# Supplementary material
Source: PubMed Central journal article supplement (PMC8536401)
Supplement: pnas.2101657118.sd01.pdf [file pnas.2101657118.sd01.pdf]

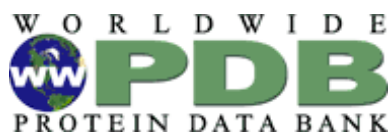

# Preliminary Full wwPDB X-ray Structure Validation Report ⓘ

Aug 9, 2020 – 11:21 AM EDT

Deposition ID : D\_1000251197

This is a Preliminary Full wwPDB X-ray Structure Validation Report.

This report is produced by the wwPDB Deposition System during initial deposition but before annotation of the structure.

We welcome your comments at [validation@mail.wwpdb.org](mailto:validation@mail.wwpdb.org)

A user guide is available at

<https://www.wwpdb.org/validation/2017/XrayValidationReportHelp>

with specific help available everywhere you see the ⓘ symbol.

---

The following versions of software and data (see [references ⓘ](#)) were used in the production of this report:

|                                |   |                                                                    |
|--------------------------------|---|--------------------------------------------------------------------|
| MolProbity                     | : | 4.02b-467                                                          |
| Mogul                          | : | 1.8.5 (274361), CSD as541be (2020)                                 |
| Xtriage (Phenix)               | : | 1.13                                                               |
| EDS                            | : | 2.13.1                                                             |
| buster-report                  | : | 1.1.7 (2018)                                                       |
| Percentile statistics          | : | 20191225.v01 (using entries in the PDB archive December 25th 2019) |
| Refmac                         | : | 5.8.0158                                                           |
| CCP4                           | : | 7.0.044 (Gargrove)                                                 |
| Ideal geometry (proteins)      | : | Engh & Huber (2001)                                                |
| Ideal geometry (DNA, RNA)      | : | Parkinson et al. (1996)                                            |
| Validation Pipeline (wwPDB-VP) | : | 2.13.1                                                             |

# 1 Overall quality at a glance i

The following experimental techniques were used to determine the structure:  
*X-RAY DIFFRACTION*

The reported resolution of this entry is 1.68 Å.

Percentile scores (ranging between 0-100) for global validation metrics of the entry are shown in the following graphic. The table shows the number of entries on which the scores are based.

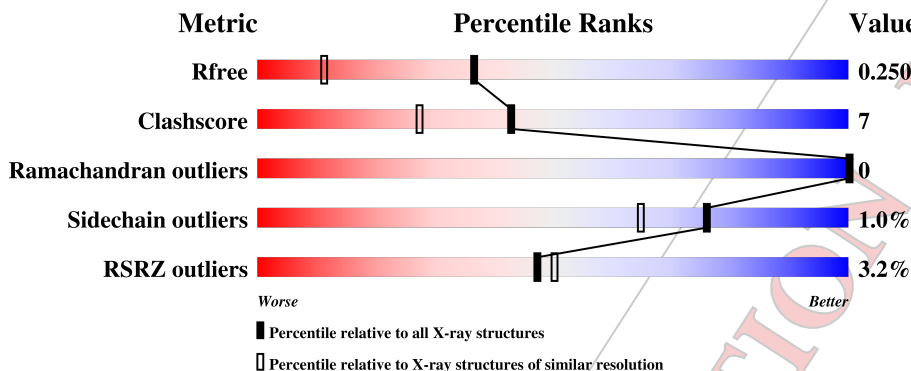

| Metric                | Whole archive<br>(#Entries) | Similar resolution<br>(#Entries, resolution range(Å)) |
|-----------------------|-----------------------------|-------------------------------------------------------|
| $R_{free}$            | 130704                      | 6780 (1.70-1.66)                                      |
| Clashscore            | 141614                      | 7310 (1.70-1.66)                                      |
| Ramachandran outliers | 138981                      | 7173 (1.70-1.66)                                      |
| Sidechain outliers    | 138945                      | 7172 (1.70-1.66)                                      |
| RSRZ outliers         | 127900                      | 6661 (1.70-1.66)                                      |

The table below summarises the geometric issues observed across the polymeric chains and their fit to the electron density. The red, orange, yellow and green segments on the lower bar indicate the fraction of residues that contain outliers for  $\geq 3$ , 2, 1 and 0 types of geometric quality criteria respectively. A grey segment represents the fraction of residues that are not modelled. The numeric value for each fraction is indicated below the corresponding segment, with a dot representing fractions  $\leq 5\%$ . The upper red bar (where present) indicates the fraction of residues that have poor fit to the electron density. The numeric value is given above the bar.

| Mol | Chain | Length | Quality of chain   |
|-----|-------|--------|--------------------|
| 1   | A     | 257    | <br>3% 78% 13% 7%  |
| 1   | B     | 257    | <br>2% 76% 10% 14% |
| 1   | C     | 257    | <br>3% 81% 12% 7%  |
| 1   | D     | 257    | <br>4% 72% 8% 18%  |

The following table lists non-polymeric compounds, carbohydrate monomers and non-standard

residues in protein, DNA, RNA chains that are outliers for geometric or electron-density-fit criteria:

| Mol | Type | Chain | Res | Chirality | Geometry | Clashes | Electron density |
|-----|------|-------|-----|-----------|----------|---------|------------------|
| 2   | LIG  | E     | 11  | -         | -        | X       | -                |

PRELIMINARY VALIDATION REPORT

## 2 Entry composition i

There are 3 unique types of molecules in this entry. The entry contains 7693 atoms, of which 0 are hydrogens and 0 are deuteriums.

In the tables below, the ZeroOcc column contains the number of atoms modelled with zero occupancy, the AltConf column contains the number of residues with at least one atom in alternate conformation and the Trace column contains the number of residues modelled with at most 2 atoms.

- Molecule 1 is a protein called Estrogen Receptor.

| Mol | Chain | Residues | Atoms         |           |          |          |         | ZeroOcc | AltConf | Trace |
|-----|-------|----------|---------------|-----------|----------|----------|---------|---------|---------|-------|
|     |       |          | Total         | C         | N        | O        | S       |         |         |       |
| 1   | A     | 239      | Total<br>1869 | C<br>1195 | N<br>320 | O<br>337 | S<br>17 | 0       | 1       | 0     |
| 1   | B     | 221      | Total<br>1733 | C<br>1112 | N<br>297 | O<br>310 | S<br>14 | 0       | 0       | 0     |
| 1   | C     | 240      | Total<br>1890 | C<br>1208 | N<br>321 | O<br>344 | S<br>17 | 0       | 1       | 0     |
| 1   | D     | 210      | Total<br>1662 | C<br>1070 | N<br>284 | O<br>294 | S<br>14 | 0       | 0       | 0     |

- Molecule 2 is a ligand with the chemical component id LIG but its atom names do not match the existing wwPDB Chemical Component Dictionary definition for LIG. Consequently no firm identification of ligand chemistry can be made. Once the structure is annotated then an identification and diagram will be given here.

| Mol | Chain | Residues | Atoms       |         |         |        |        | ZeroOcc | AltConf |   |   |
|-----|-------|----------|-------------|---------|---------|--------|--------|---------|---------|---|---|
|     |       |          | Total       | C       | Cl      | F      | N      |         |         | O | S |
| 2   | E     | 1        | Total<br>37 | C<br>26 | Cl<br>1 | F<br>3 | N<br>1 | O<br>5  | S<br>1  | 0 | 0 |
| 2   | E     | 1        | Total<br>25 | C<br>18 | N<br>1  | O<br>5 | S<br>1 | 0       | 0       | 0 |   |
| 2   | E     | 1        | Total<br>33 | C<br>25 | Cl<br>1 | N<br>1 | O<br>5 | S<br>1  | 0       | 0 |   |
| 2   | E     | 1        | Total<br>33 | C<br>25 | Cl<br>1 | N<br>1 | O<br>5 | S<br>1  | 0       | 0 |   |

- Molecule 3 is water.

| Mol | Chain | Residues | Atoms        |          | ZeroOcc | AltConf |
|-----|-------|----------|--------------|----------|---------|---------|
| 3   | S     | 411      | Total<br>411 | O<br>411 | 0       | 0       |

### 3 Residue-property plots [i](#)

These plots are drawn for all protein, RNA, DNA and oligosaccharide chains in the entry. The first graphic for a chain summarises the proportions of the various outlier classes displayed in the second graphic. The second graphic shows the sequence view annotated by issues in geometry and electron density. Residues are color-coded according to the number of geometric quality criteria for which they contain at least one outlier: green = 0, yellow = 1, orange = 2 and red = 3 or more. A red dot above a residue indicates a poor fit to the electron density ( $RSRZ > 2$ ). Stretches of 2 or more consecutive residues without any outlier are shown as a green connector. Residues present in the sample, but not in the model, are shown in grey.

- Molecule 1: Estrogen Receptor

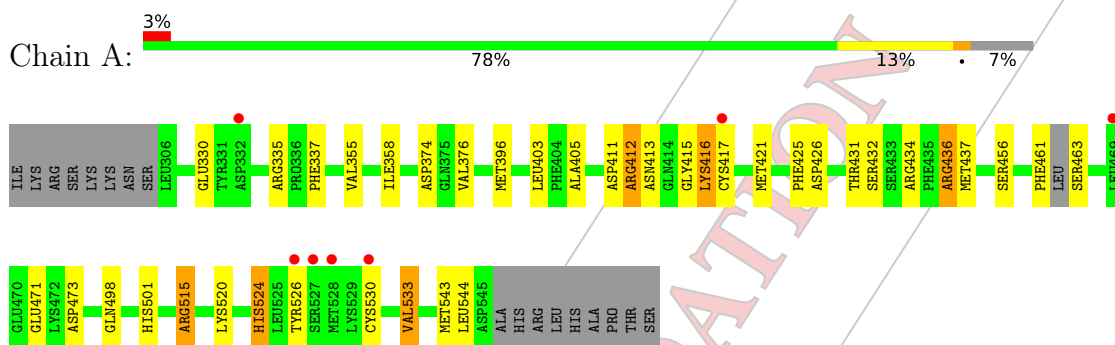

- Molecule 1: Estrogen Receptor

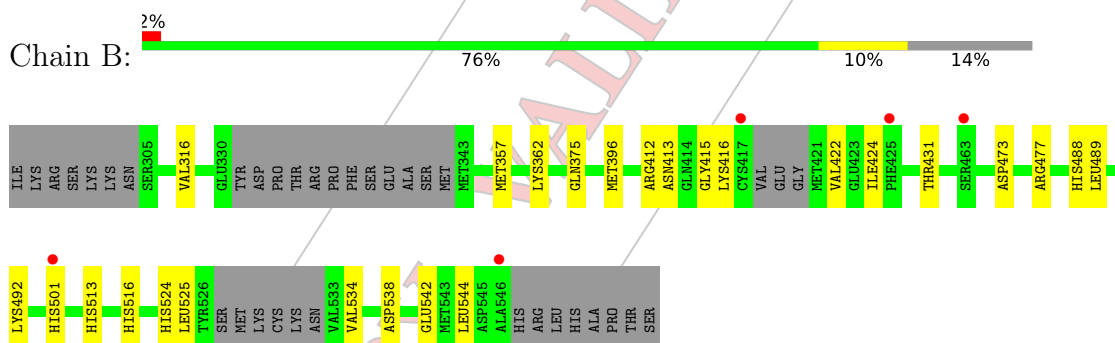

- Molecule 1: Estrogen Receptor

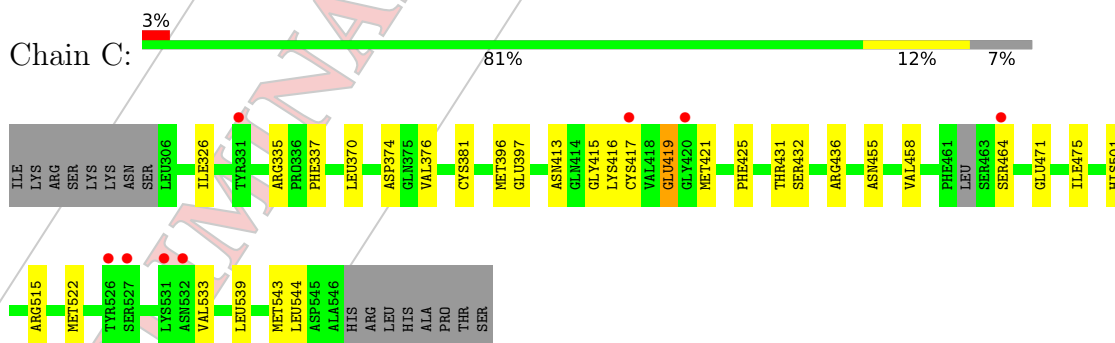

- Molecule 1: Estrogen Receptor

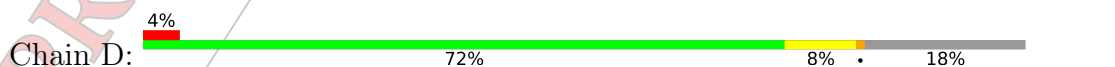

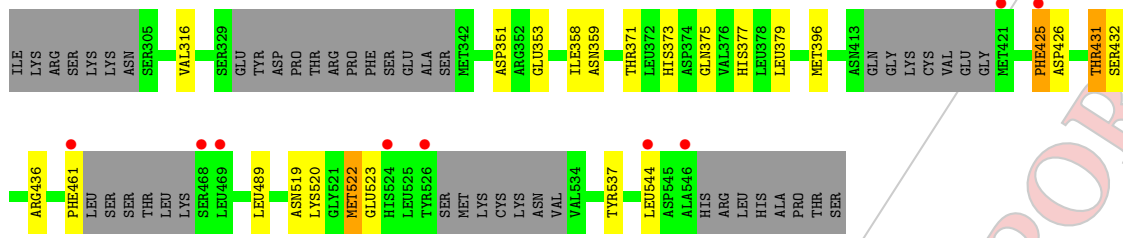

PRELIMINARY VALIDATION REPORT

## 4 Data and refinement statistics i

| Property                                                                | Value                                                       | Source           |
|-------------------------------------------------------------------------|-------------------------------------------------------------|------------------|
| Space group                                                             | P 1                                                         | Depositor        |
| Cell constants<br>a, b, c, $\alpha$ , $\beta$ , $\gamma$                | 53.49Å 58.77Å 93.21Å<br>86.61° 75.17° 62.96°                | Depositor        |
| Resolution (Å)                                                          | 89.90 – 1.68<br>89.90 – 1.68                                | Depositor<br>EDS |
| % Data completeness<br>(in resolution range)                            | 59.8 (89.90-1.68)<br>59.8 (89.90-1.68)                      | Depositor<br>EDS |
| $R_{merge}$                                                             | (Not available)                                             | Depositor        |
| $R_{sym}$                                                               | (Not available)                                             | Depositor        |
| $\langle I/\sigma(I) \rangle$ <sup>1</sup>                              | 1.57 (at 1.68Å)                                             | Xtrriage         |
| Refinement program                                                      | REFMAC 5.8.0253                                             | Depositor        |
| R, $R_{free}$                                                           | 0.199 , 0.244<br>0.211 , 0.250                              | Depositor<br>DCC |
| $R_{free}$ test set                                                     | 3267 reflections (4.93%)                                    | wwPDB-VP         |
| Wilson B-factor (Å <sup>2</sup> )                                       | 25.0                                                        | Xtrriage         |
| Anisotropy                                                              | 0.041                                                       | Xtrriage         |
| Bulk solvent $k_{sol}$ (e/Å <sup>3</sup> ), $B_{sol}$ (Å <sup>2</sup> ) | 0.36 , 48.3                                                 | EDS              |
| L-test for twinning <sup>2</sup>                                        | $\langle  L  \rangle = 0.51$ , $\langle L^2 \rangle = 0.35$ | Xtrriage         |
| Estimated twinning fraction                                             | 0.085 for h,h-k,h-l                                         | Xtrriage         |
| $F_o, F_c$ correlation                                                  | 0.94                                                        | EDS              |
| Total number of atoms                                                   | 7693                                                        | wwPDB-VP         |
| Average B, all atoms (Å <sup>2</sup> )                                  | 33.0                                                        | wwPDB-VP         |

Xtrriage's analysis on translational NCS is as follows: *The largest off-origin peak in the Patterson function is 7.44% of the height of the origin peak. No significant pseudotranslation is detected.*

<sup>1</sup> Intensities estimated from amplitudes.

<sup>2</sup> Theoretical values of  $\langle |L| \rangle$ ,  $\langle L^2 \rangle$  for acentric reflections are 0.5, 0.333 respectively for untwinned datasets, and 0.375, 0.2 for perfectly twinned datasets.

## 5 Model quality i

### 5.1 Standard geometry i

Bond lengths and bond angles in the following residue types are not validated in this section: LIG, YCM

The Z score for a bond length (or angle) is the number of standard deviations the observed value is removed from the expected value. A bond length (or angle) with  $|Z| > 5$  is considered an outlier worth inspection. RMSZ is the root-mean-square of all Z scores of the bond lengths (or angles).

| Mol | Chain | Bond lengths |                | Bond angles |                |
|-----|-------|--------------|----------------|-------------|----------------|
|     |       | RMSZ         | # Z  >5        | RMSZ        | # Z  >5        |
| 1   | A     | 1.04         | 5/1896 (0.3%)  | 0.93        | 8/2568 (0.3%)  |
| 1   | B     | 1.04         | 2/1750 (0.1%)  | 0.89        | 2/2363 (0.1%)  |
| 1   | C     | 0.95         | 2/1917 (0.1%)  | 0.93        | 3/2594 (0.1%)  |
| 1   | D     | 1.16         | 3/1679 (0.2%)  | 0.94        | 3/2267 (0.1%)  |
| All | All   | 1.05         | 12/7242 (0.2%) | 0.92        | 16/9792 (0.2%) |

Chiral center outliers are detected by calculating the chiral volume of a chiral center and verifying if the center is modelled as a planar moiety or with the opposite hand. A planarity outlier is detected by checking planarity of atoms in a peptide group, atoms in a mainchain group or atoms of a sidechain that are expected to be planar.

| Mol | Chain | #Chirality outliers | #Planarity outliers |
|-----|-------|---------------------|---------------------|
| 1   | C     | 0                   | 3                   |

All (12) bond length outliers are listed below:

| Mol | Chain | Res | Type | Atoms | Z      | Observed(Å) | Ideal(Å) |
|-----|-------|-----|------|-------|--------|-------------|----------|
| 1   | D     | 431 | THR  | C-N   | -22.69 | 0.81        | 1.34     |
| 1   | B     | 431 | THR  | C-N   | -19.98 | 0.88        | 1.34     |
| 1   | D     | 522 | MET  | C-N   | -19.33 | 0.89        | 1.34     |
| 1   | A     | 412 | ARG  | C-N   | -15.16 | 0.99        | 1.34     |
| 1   | C     | 419 | GLU  | C-N   | -13.85 | 1.08        | 1.33     |
| 1   | A     | 411 | ASP  | C-N   | -12.26 | 1.05        | 1.34     |
| 1   | A     | 415 | GLY  | C-N   | -11.12 | 1.08        | 1.34     |
| 1   | A     | 431 | THR  | C-N   | -9.47  | 1.12        | 1.34     |
| 1   | B     | 357 | MET  | C-N   | -8.44  | 1.14        | 1.34     |
| 1   | D     | 425 | PHE  | C-N   | 6.57   | 1.49        | 1.34     |
| 1   | C     | 431 | THR  | C-N   | -6.30  | 1.19        | 1.34     |
| 1   | A     | 432 | SER  | C-N   | -5.61  | 1.21        | 1.34     |

All (16) bond angle outliers are listed below:



| Mol | Chain | Res | Type | Atoms     | Z     | Observed(°) | Ideal(°) |
|-----|-------|-----|------|-----------|-------|-------------|----------|
| 1   | A     | 411 | ASP  | O-C-N     | 8.58  | 136.43      | 122.70   |
| 1   | A     | 432 | SER  | O-C-N     | -7.79 | 110.24      | 122.70   |
| 1   | B     | 396 | MET  | CG-SD-CE  | -7.69 | 87.90       | 100.20   |
| 1   | D     | 522 | MET  | O-C-N     | -6.33 | 112.56      | 122.70   |
| 1   | A     | 432 | SER  | CA-C-N    | 5.82  | 130.01      | 117.20   |
| 1   | A     | 436 | ARG  | NE-CZ-NH1 | 5.63  | 123.11      | 120.30   |
| 1   | B     | 525 | LEU  | CA-CB-CG  | 5.46  | 127.86      | 115.30   |
| 1   | A     | 411 | ASP  | CA-C-N    | -5.41 | 105.30      | 117.20   |
| 1   | C     | 522 | MET  | CG-SD-CE  | -5.34 | 91.66       | 100.20   |
| 1   | C     | 432 | SER  | O-C-N     | -5.29 | 114.23      | 122.70   |
| 1   | A     | 416 | LYS  | CA-C-N    | -5.25 | 105.66      | 117.20   |
| 1   | D     | 426 | ASP  | CB-CG-OD2 | 5.20  | 122.98      | 118.30   |
| 1   | C     | 515 | ARG  | NE-CZ-NH1 | 5.18  | 122.89      | 120.30   |
| 1   | D     | 359 | ASN  | CB-CA-C   | 5.12  | 120.64      | 110.40   |
| 1   | A     | 515 | ARG  | NE-CZ-NH1 | 5.07  | 122.83      | 120.30   |
| 1   | A     | 416 | LYS  | O-C-N     | 5.06  | 130.80      | 122.70   |

There are no chirality outliers.

All (3) planarity outliers are listed below:

| Mol | Chain | Res    | Type | Group     |
|-----|-------|--------|------|-----------|
| 1   | C     | 419    | GLU  | Mainchain |
| 1   | C     | 501[A] | HIS  | Mainchain |
| 1   | C     | 501[B] | HIS  | Mainchain |

## 5.2 Too-close contacts [i](#)

In the following table, the Non-H and H(model) columns list the number of non-hydrogen atoms and hydrogen atoms in the chain respectively. The H(added) column lists the number of hydrogen atoms added and optimized by MolProbity. The Clashes column lists the number of clashes within the asymmetric unit, whereas Symm-Clashes lists symmetry related clashes.

| Mol | Chain | Non-H | H(model) | H(added) | Clashes | Symm-Clashes |
|-----|-------|-------|----------|----------|---------|--------------|
| 1   | A     | 1869  | 0        | 1854     | 40      | 0            |
| 1   | B     | 1733  | 0        | 1761     | 17      | 0            |
| 1   | C     | 1890  | 0        | 1892     | 20      | 0            |
| 1   | D     | 1662  | 0        | 1680     | 22      | 0            |
| 2   | E     | 128   | 0        | 4        | 16      | 0            |
| 3   | S     | 411   | 0        | 0        | 6       | 0            |
| All | All   | 7693  | 0        | 7191     | 98      | 0            |

The all-atom clashscore is defined as the number of clashes found per 1000 atoms (including

hydrogen atoms). The all-atom clashscore for this structure is 7.

All (98) close contacts within the same asymmetric unit are listed below, sorted by their clash magnitude.

| Atom-1           | Atom-2           | Interatomic distance (Å) | Clash overlap (Å) |
|------------------|------------------|--------------------------|-------------------|
| 1:D:431:THR:CA   | 1:D:432:SER:N    | 2.03                     | 1.20              |
| 1:C:421:MET:CB   | 2:E:11:LIG:C24   | 2.19                     | 1.19              |
| 1:D:431:THR:C    | 1:D:432:SER:CA   | 2.12                     | 1.18              |
| 1:D:431:THR:O    | 1:D:432:SER:N    | 1.81                     | 1.11              |
| 1:D:425:PHE:HD2  | 2:E:4:LIG:CL01   | 1.72                     | 1.09              |
| 1:D:425:PHE:CD2  | 2:E:4:LIG:CL01   | 2.49                     | 1.03              |
| 1:A:413:ASN:HD22 | 1:A:416:LYS:HE2  | 1.37                     | 0.89              |
| 1:C:370:LEU:HD11 | 1:C:475:ILE:HD11 | 1.56                     | 0.88              |
| 1:A:355:VAL:HG22 | 1:A:543:MET:HE1  | 1.54                     | 0.87              |
| 1:B:416:LYS:HG3  | 1:B:422:VAL:HG21 | 1.56                     | 0.86              |
| 1:D:431:THR:C    | 1:D:432:SER:N    | 0.81                     | 0.86              |
| 1:C:421:MET:CB   | 2:E:11:LIG:C23   | 2.56                     | 0.83              |
| 1:A:355:VAL:HA   | 1:A:543:MET:CE   | 2.10                     | 0.82              |
| 1:B:416:LYS:HG3  | 1:B:422:VAL:CG2  | 2.09                     | 0.81              |
| 1:A:355:VAL:HG22 | 1:A:543:MET:CE   | 2.11                     | 0.81              |
| 1:A:413:ASN:HD22 | 1:A:416:LYS:CE   | 1.93                     | 0.80              |
| 1:D:522:MET:O    | 1:D:523:GLU:C    | 2.15                     | 0.78              |
| 1:A:355:VAL:HA   | 1:A:543:MET:HE1  | 1.68                     | 0.76              |
| 1:A:456:SER:HA   | 1:A:515:ARG:HH22 | 1.49                     | 0.76              |
| 1:D:351:ASP:OD2  | 3:S:263:HOH:O    | 2.05                     | 0.75              |
| 1:A:533:VAL:HG13 | 2:E:9:LIG:O01    | 1.86                     | 0.75              |
| 1:A:355:VAL:CA   | 1:A:543:MET:HE1  | 2.22                     | 0.69              |
| 1:A:413:ASN:ND2  | 1:A:416:LYS:HE2  | 2.06                     | 0.68              |
| 1:A:355:VAL:CG2  | 1:A:543:MET:HE1  | 2.22                     | 0.68              |
| 1:C:421:MET:CB   | 2:E:11:LIG:C25   | 2.75                     | 0.65              |
| 1:A:355:VAL:HA   | 1:A:543:MET:HE2  | 1.78                     | 0.63              |
| 1:A:456:SER:HA   | 1:A:515:ARG:NH2  | 2.15                     | 0.62              |
| 1:C:415:GLY:HA2  | 2:E:11:LIG:CL01  | 2.37                     | 0.61              |
| 1:B:416:LYS:CG   | 1:B:422:VAL:HG21 | 2.31                     | 0.61              |
| 1:A:456:SER:CB   | 1:A:515:ARG:NH2  | 2.63                     | 0.61              |
| 1:A:515:ARG:HH11 | 1:B:516:HIS:HB2  | 1.67                     | 0.60              |
| 1:C:413:ASN:O    | 1:C:416:LYS:HG3  | 2.02                     | 0.59              |
| 1:A:413:ASN:ND2  | 1:A:416:LYS:CE   | 2.65                     | 0.59              |
| 1:C:533:VAL:CG1  | 2:E:11:LIG:O01   | 2.51                     | 0.59              |
| 1:B:424:ILE:HG21 | 2:E:10:LIG:O04   | 2.03                     | 0.58              |
| 1:B:362:LYS:NZ   | 1:B:544:LEU:O    | 2.29                     | 0.58              |
| 1:C:464:SER:CB   | 3:S:329:HOH:O    | 2.51                     | 0.57              |
| 1:C:533:VAL:HG13 | 2:E:11:LIG:O01   | 2.06                     | 0.56              |

Continued on next page...

Continued from previous page...

| Atom-1           | Atom-2             | Interatomic distance (Å) | Clash overlap (Å) |
|------------------|--------------------|--------------------------|-------------------|
| 1:B:538:ASP:O    | 1:B:542:GLU:HG3    | 2.05                     | 0.56              |
| 1:D:353:GLU:OE1  | 2:E:4:LIG:O02      | 2.24                     | 0.55              |
| 1:D:375:GLN:HB3  | 1:D:544:LEU:HD21   | 1.89                     | 0.55              |
| 1:C:396:MET:O    | 1:C:436:ARG:HD3    | 2.08                     | 0.53              |
| 1:D:396:MET:O    | 1:D:436:ARG:HD3    | 2.07                     | 0.53              |
| 1:D:373:HIS:CD2  | 1:D:537:TYR:OH     | 2.62                     | 0.52              |
| 1:D:377:HIS:CD2  | 1:D:461:PHE:CE1    | 2.97                     | 0.52              |
| 1:A:335:ARG:HD3  | 1:A:337:PHE:CZ     | 2.47                     | 0.50              |
| 1:C:425:PHE:CE1  | 2:E:11:LIG:CL01    | 3.02                     | 0.50              |
| 1:A:520:LYS:O    | 1:A:524:HIS:ND1    | 2.45                     | 0.49              |
| 1:B:524:HIS:NE2  | 2:E:10:LIG:C20     | 2.76                     | 0.49              |
| 1:D:373:HIS:HD2  | 1:D:537:TYR:OH     | 1.95                     | 0.49              |
| 1:C:539:LEU:HG   | 1:C:543:MET:CE     | 2.42                     | 0.49              |
| 1:A:403:LEU:CD1  | 1:A:405:ALA:O      | 2.61                     | 0.48              |
| 1:A:533:VAL:CG1  | 2:E:9:LIG:O01      | 2.59                     | 0.48              |
| 1:A:396:MET:O    | 1:A:436:ARG:HD3    | 2.14                     | 0.47              |
| 1:D:431:THR:N    | 1:D:432:SER:N      | 2.59                     | 0.47              |
| 1:C:335:ARG:HD3  | 1:C:337:PHE:CZ     | 2.50                     | 0.47              |
| 1:A:530:CYS:O    | 1:A:533:VAL:HB     | 2.14                     | 0.46              |
| 1:A:421:MET:HB3  | 1:A:421:MET:HE3    | 1.83                     | 0.46              |
| 1:A:403:LEU:HD12 | 1:A:405:ALA:O      | 2.15                     | 0.46              |
| 1:A:456:SER:HB3  | 1:A:515:ARG:NH2    | 2.30                     | 0.46              |
| 1:A:355:VAL:HG22 | 1:A:543:MET:HE3    | 1.95                     | 0.45              |
| 1:A:456:SER:CB   | 1:A:515:ARG:HH21   | 2.30                     | 0.45              |
| 1:C:376:VAL:HG22 | 1:C:544:LEU:HD12   | 1.98                     | 0.45              |
| 1:D:358:ILE:CD1  | 1:D:379:LEU:HD13   | 2.46                     | 0.45              |
| 1:A:498:GLN:HA   | 1:A:501[B]:HIS:CE1 | 2.51                     | 0.45              |
| 1:C:533:VAL:HG11 | 2:E:11:LIG:O01     | 2.15                     | 0.45              |
| 1:D:371:THR:HG21 | 3:S:458:HOH:O      | 2.16                     | 0.45              |
| 1:A:376:VAL:HG22 | 1:A:544:LEU:HD12   | 1.99                     | 0.45              |
| 1:D:431:THR:O    | 1:D:432:SER:CA     | 2.49                     | 0.45              |
| 1:B:375:GLN:HB3  | 1:B:544:LEU:HD21   | 1.98                     | 0.45              |
| 1:A:412:ARG:NE   | 1:A:426:ASP:OD1    | 2.47                     | 0.44              |
| 1:B:316:VAL:HG21 | 1:B:489:LEU:HD21   | 1.98                     | 0.44              |
| 1:B:524:HIS:CD2  | 2:E:10:LIG:C20     | 3.01                     | 0.44              |
| 1:B:513:HIS:ND1  | 3:S:366:HOH:O      | 2.36                     | 0.44              |
| 1:B:413:ASN:HA   | 1:B:416:LYS:HD3    | 2.00                     | 0.44              |
| 1:A:355:VAL:CB   | 1:A:543:MET:HE1    | 2.48                     | 0.44              |
| 1:D:316:VAL:HG21 | 1:D:489:LEU:HD21   | 2.00                     | 0.43              |
| 1:A:374:ASP:OD2  | 1:A:471:GLU:OE1    | 2.36                     | 0.43              |
| 1:B:473:ASP:OD2  | 1:B:477:ARG:NH1    | 2.52                     | 0.43              |

Continued on next page...

Continued from previous page...

| Atom-1           | Atom-2           | Interatomic distance (Å) | Clash overlap (Å) |
|------------------|------------------|--------------------------|-------------------|
| 1:C:381:YCM:HD3  | 3:S:149:HOH:O    | 2.18                     | 0.43              |
| 1:A:358:ILE:HG23 | 1:A:544:LEU:HD23 | 2.00                     | 0.43              |
| 1:A:434:ARG:HD2  | 1:A:437:MET:HE2  | 1.99                     | 0.43              |
| 1:A:355:VAL:HG13 | 1:A:543:MET:CE   | 2.49                     | 0.42              |
| 1:A:461:PHE:O    | 1:A:463:SER:CB   | 2.67                     | 0.42              |
| 1:C:397:GLU:OE1  | 1:C:397:GLU:HA   | 2.19                     | 0.42              |
| 1:A:330:GLU:HG3  | 3:S:40:HOH:O     | 2.19                     | 0.42              |
| 1:B:375:GLN:CB   | 1:B:544:LEU:HD21 | 2.50                     | 0.42              |
| 1:B:412:ARG:O    | 1:B:415:GLY:N    | 2.52                     | 0.41              |
| 1:A:524:HIS:HD1  | 1:A:524:HIS:N    | 2.18                     | 0.41              |
| 1:B:488:HIS:CE1  | 1:B:492:LYS:HD2  | 2.56                     | 0.41              |
| 1:D:520:LYS:HE3  | 1:D:523:GLU:OE2  | 2.21                     | 0.41              |
| 1:A:524:HIS:C    | 1:A:526:TYR:N    | 2.72                     | 0.41              |
| 1:A:421:MET:HE3  | 1:A:425:PHE:CE1  | 2.56                     | 0.41              |
| 1:C:455:ASN:O    | 1:C:458:VAL:HG12 | 2.21                     | 0.40              |
| 1:D:358:ILE:HD13 | 1:D:379:LEU:HD13 | 2.03                     | 0.40              |
| 1:C:374:ASP:OD2  | 1:C:471:GLU:OE1  | 2.38                     | 0.40              |
| 1:C:370:LEU:CD1  | 1:C:475:ILE:HD11 | 2.40                     | 0.40              |
| 1:D:519:ASN:HA   | 1:D:519:ASN:HD22 | 1.77                     | 0.40              |

There are no symmetry-related clashes.

## 5.3 Torsion angles [i](#)

### 5.3.1 Protein backbone [i](#)

In the following table, the Percentiles column shows the percent Ramachandran outliers of the chain as a percentile score with respect to all X-ray entries followed by that with respect to entries of similar resolution.

The Analysed column shows the number of residues for which the backbone conformation was analysed, and the total number of residues.

| Mol | Chain | Analysed       | Favoured   | Allowed | Outliers | Percentiles |     |
|-----|-------|----------------|------------|---------|----------|-------------|-----|
| 1   | A     | 235/257 (91%)  | 229 (97%)  | 6 (3%)  | 0        | 100         | 100 |
| 1   | B     | 212/257 (82%)  | 211 (100%) | 1 (0%)  | 0        | 100         | 100 |
| 1   | C     | 236/257 (92%)  | 233 (99%)  | 3 (1%)  | 0        | 100         | 100 |
| 1   | D     | 199/257 (77%)  | 198 (100%) | 1 (0%)  | 0        | 100         | 100 |
| All | All   | 882/1028 (86%) | 871 (99%)  | 11 (1%) | 0        | 100         | 100 |

There are no Ramachandran outliers to report.

### 5.3.2 Protein sidechains [i](#)

In the following table, the Percentiles column shows the percent sidechain outliers of the chain as a percentile score with respect to all X-ray entries followed by that with respect to entries of similar resolution.

The Analysed column shows the number of residues for which the sidechain conformation was analysed, and the total number of residues.

| Mol | Chain | Analysed      | Rotameric  | Outliers | Percentiles |
|-----|-------|---------------|------------|----------|-------------|
| 1   | A     | 201/232 (87%) | 197 (98%)  | 4 (2%)   | 55 36       |
| 1   | B     | 189/232 (82%) | 187 (99%)  | 2 (1%)   | 73 61       |
| 1   | C     | 206/232 (89%) | 204 (99%)  | 2 (1%)   | 76 65       |
| 1   | D     | 180/232 (78%) | 180 (100%) | 0        | 100 100     |
| All | All   | 776/928 (84%) | 768 (99%)  | 8 (1%)   | 76 65       |

All (8) residues with a non-rotameric sidechain are listed below:

| Mol | Chain | Res | Type |
|-----|-------|-----|------|
| 1   | A     | 417 | CYS  |
| 1   | A     | 473 | ASP  |
| 1   | A     | 524 | HIS  |
| 1   | A     | 533 | VAL  |
| 1   | B     | 501 | HIS  |
| 1   | B     | 534 | VAL  |
| 1   | C     | 326 | ILE  |
| 1   | C     | 417 | CYS  |

Some sidechains can be flipped to improve hydrogen bonding and reduce clashes. All (14) such sidechains are listed below:

| Mol | Chain | Res | Type |
|-----|-------|-----|------|
| 1   | A     | 373 | HIS  |
| 1   | A     | 413 | ASN  |
| 1   | A     | 500 | GLN  |
| 1   | A     | 519 | ASN  |
| 1   | B     | 398 | HIS  |
| 1   | B     | 474 | HIS  |
| 1   | B     | 488 | HIS  |
| 1   | B     | 519 | ASN  |
| 1   | C     | 359 | ASN  |

*Continued on next page...*

*Continued from previous page...*

| Mol | Chain | Res | Type |
|-----|-------|-----|------|
| 1   | C     | 498 | GLN  |
| 1   | C     | 502 | GLN  |
| 1   | C     | 519 | ASN  |
| 1   | D     | 373 | HIS  |
| 1   | D     | 519 | ASN  |

### 5.3.3 RNA [i](#)

There are no RNA molecules in this entry.

### 5.4 Non-standard residues in protein, DNA, RNA chains [i](#)

There are no non-standard protein/DNA/RNA residues in this entry.

### 5.5 Carbohydrates [i](#)

There are no monosaccharides in this entry.

### 5.6 Ligand geometry [i](#)

Of 4 ligands modelled in this entry, 4 could not be matched to an existing wwPDB Chemical Component Dictionary definition at this stage - leaving 0 for Mogul analysis.

There are no bond length outliers.

There are no bond angle outliers.

There are no chirality outliers.

There are no torsion outliers.

There are no ring outliers.

No monomer is involved in short contacts.

The following is a two-dimensional graphical depiction of Mogul quality analysis of bond lengths, bond angles, torsion angles, and ring geometry for all instances of the Ligand of Interest. In addition, ligands with molecular weight > 250 and outliers as shown on the validation Tables will also be included. For torsion angles, if less than 5% of the Mogul distribution of torsion angles is within 10 degrees of the torsion angle in question, then that torsion angle is considered an outlier. Any bond that is central to one or more torsion angles identified as an outlier by Mogul will be highlighted in the graph. For rings, the root-mean-square deviation (RMSD) between the ring in question and similar rings identified by Mogul is calculated over all ring torsion angles. If the average RMSD is greater than 60 degrees and the minimal RMSD between the ring in question and

any Mogul-identified rings is also greater than 60 degrees, then that ring is considered an outlier. The outliers are highlighted in purple. The color gray indicates Mogul did not find sufficient equivalents in the CSD to analyse the geometry.

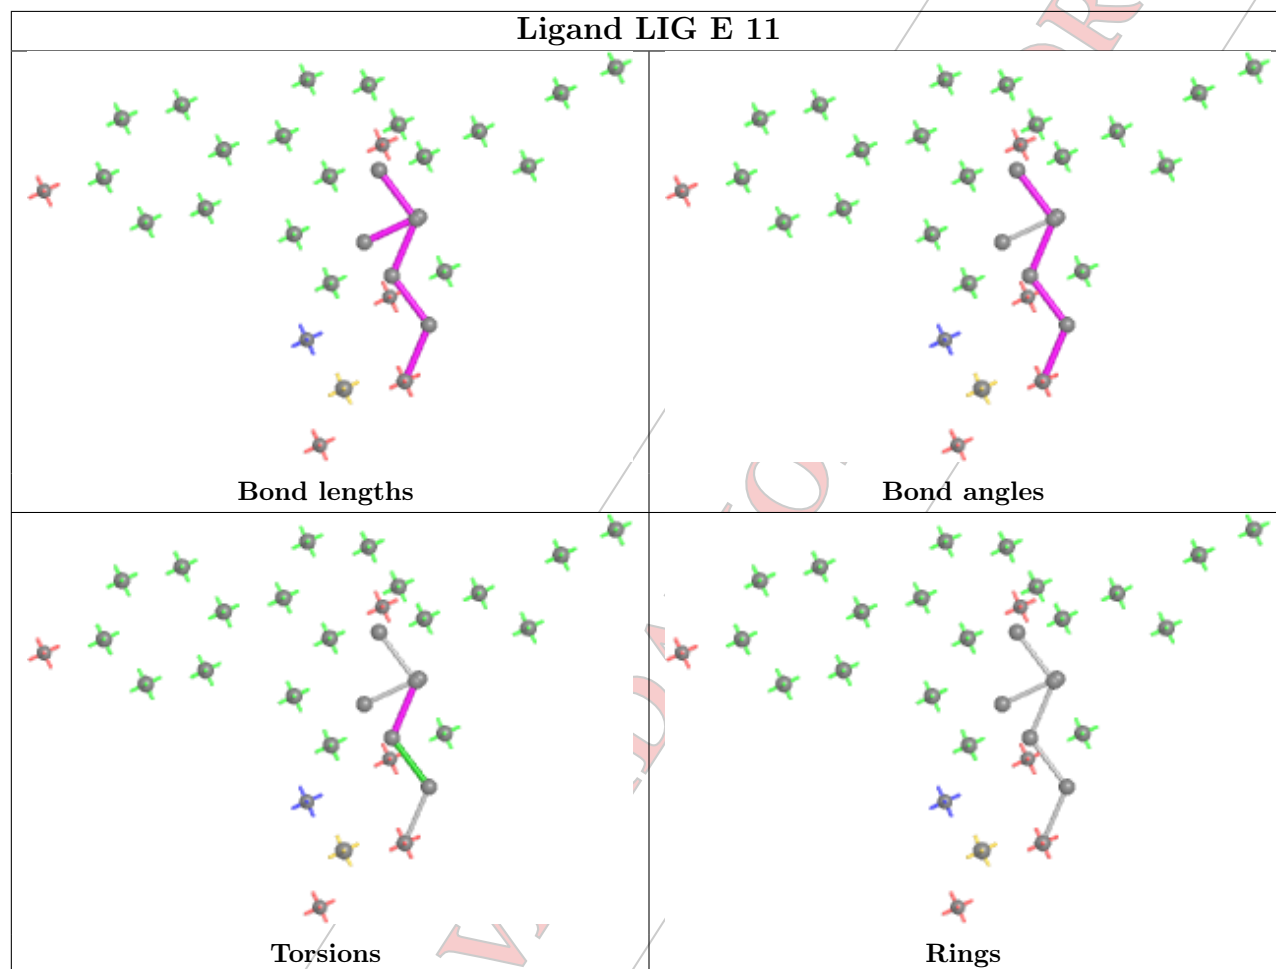

PRELIMINARY

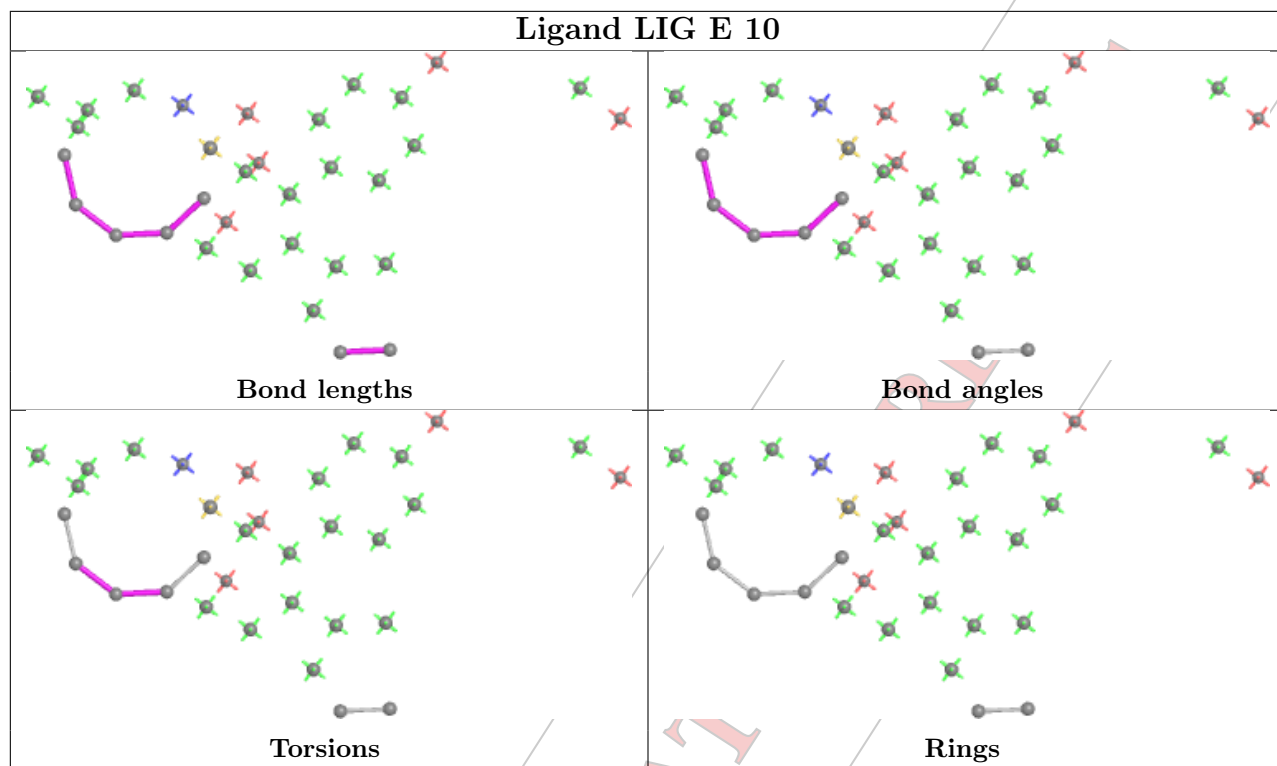

**PRELIMINARY VALIDATION**



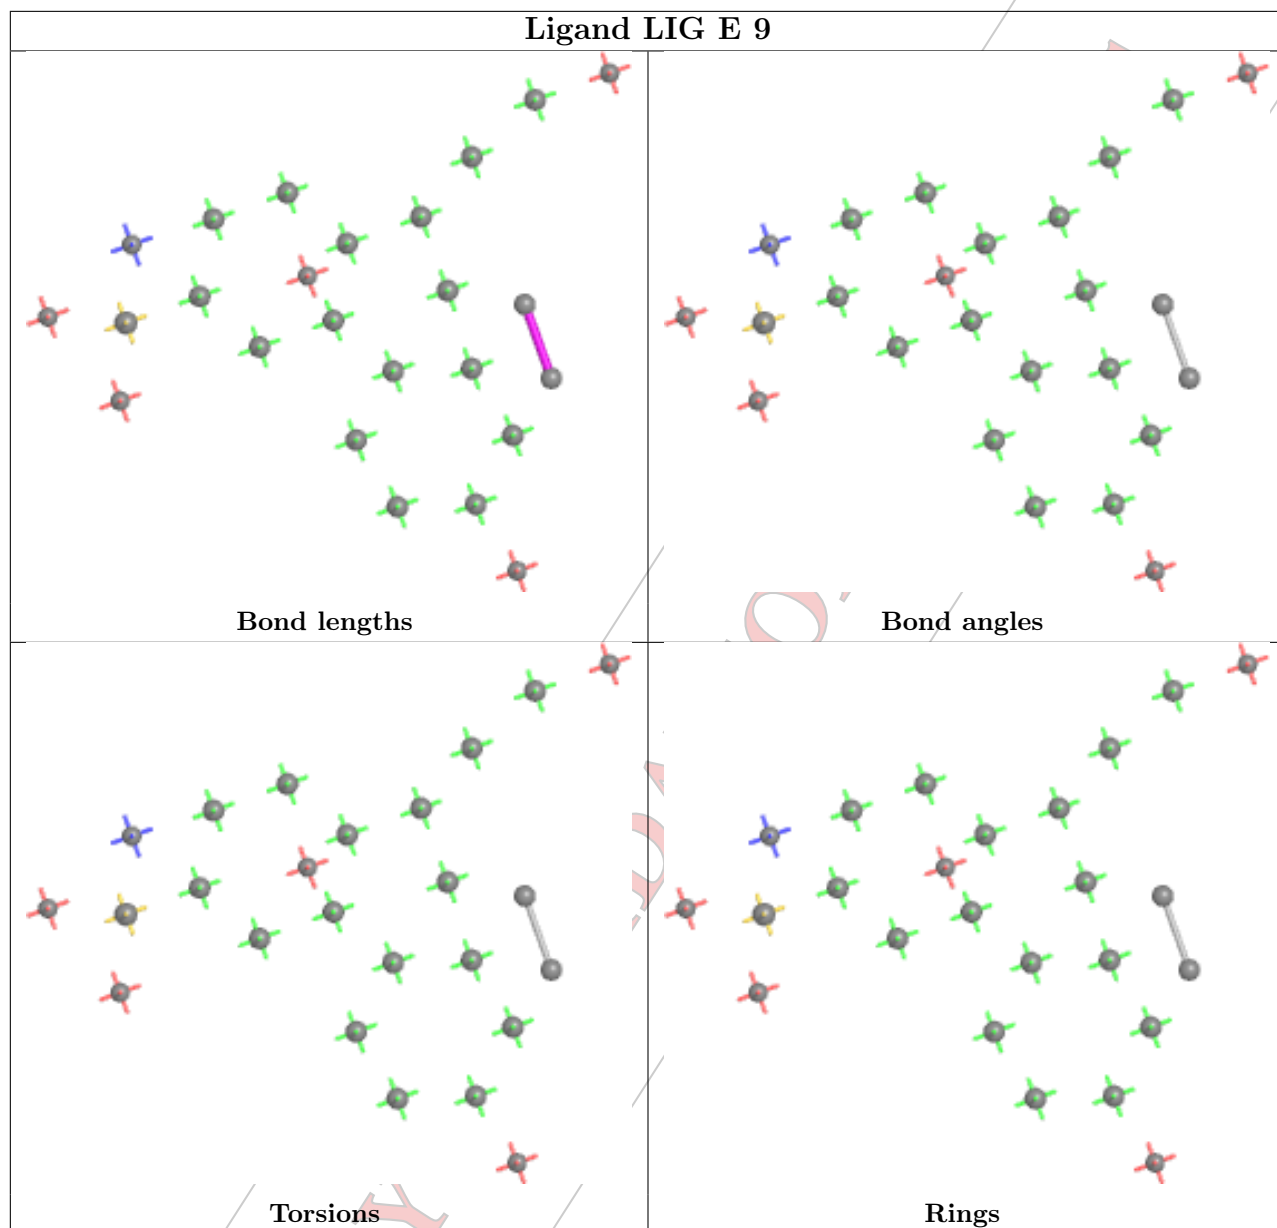

PRELIMINARY

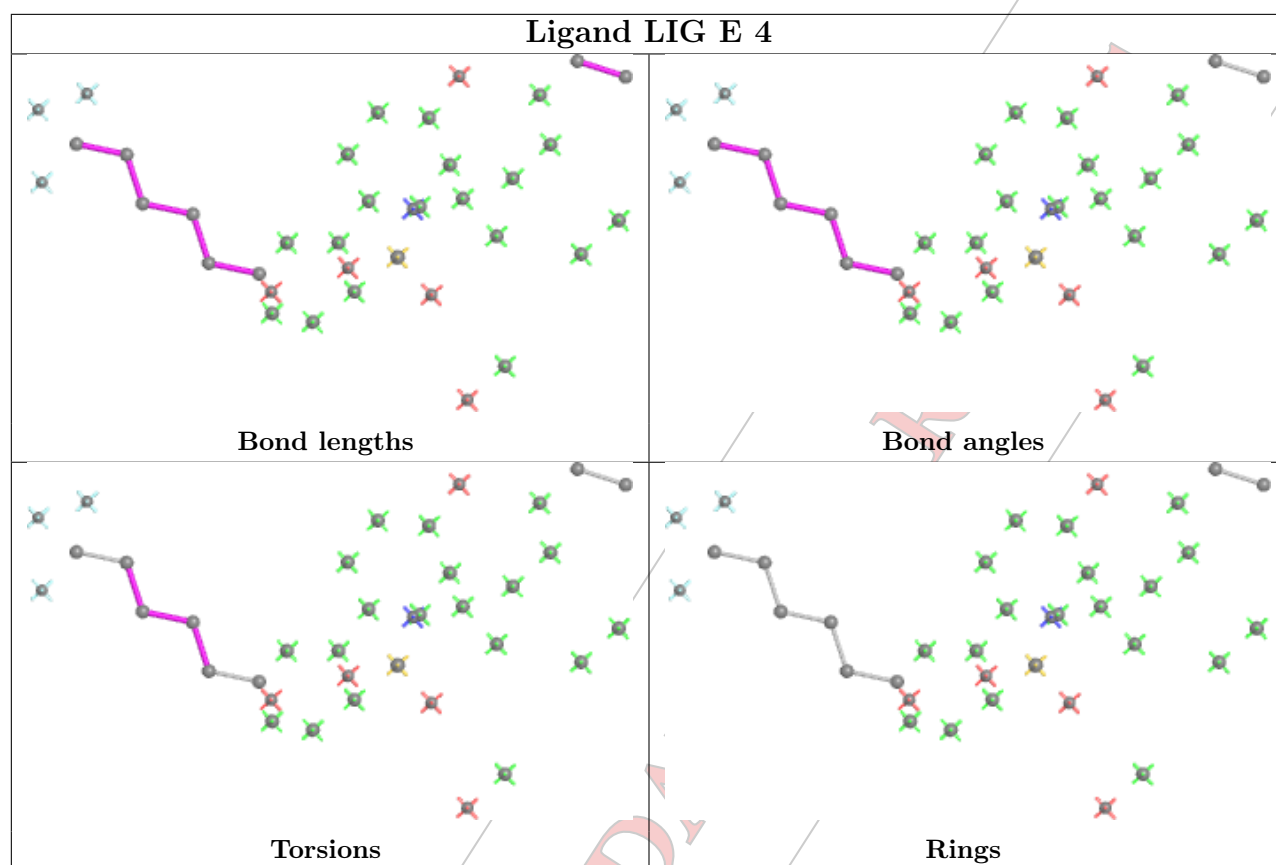

## 5.7 Other polymers (i)

There are no such residues in this entry.

## 5.8 Polymer linkage issues (i)

The following chains have linkage breaks:

| Mol | Chain | Number of breaks |
|-----|-------|------------------|
| 1   | A     | 4                |
| 1   | B     | 2                |
| 1   | D     | 2                |
| 1   | C     | 2                |

All chain breaks are listed below:

| Model | Chain | Residue-1 | Atom-1 | Residue-2 | Atom-2 | Distance (Å) |
|-------|-------|-----------|--------|-----------|--------|--------------|
| 1     | C     | 431:THR   | C      | 432:SER   | N      | 1.19         |
| 1     | B     | 357:MET   | C      | 358:ILE   | N      | 1.14         |
| 1     | A     | 431:THR   | C      | 432:SER   | N      | 1.12         |
| 1     | A     | 415:GLY   | C      | 416:LYS   | N      | 1.08         |

*Continued on next page...*

*Continued from previous page...*

| Model | Chain | Residue-1 | Atom-1 | Residue-2 | Atom-2 | Distance (Å) |
|-------|-------|-----------|--------|-----------|--------|--------------|
| 1     | C     | 419:GLU   | C      | 420:GLY   | N      | 1.08         |
| 1     | A     | 411:ASP   | C      | 412:ARG   | N      | 1.05         |
| 1     | A     | 412:ARG   | C      | 413:ASN   | N      | 0.99         |
| 1     | D     | 522:MET   | C      | 523:GLU   | N      | 0.89         |
| 1     | B     | 431:THR   | C      | 432:SER   | N      | 0.88         |
| 1     | D     | 431:THR   | C      | 432:SER   | N      | 0.81         |

PRELIMINARY VALIDATION REPORT

## 6 Fit of model and data [i](#)

### 6.1 Protein, DNA and RNA chains [i](#)

In the following table, the column labelled '#RSRZ > 2' contains the number (and percentage) of RSRZ outliers, followed by percent RSRZ outliers for the chain as percentile scores relative to all X-ray entries and entries of similar resolution. The OWAB column contains the minimum, median, 95<sup>th</sup> percentile and maximum values of the occupancy-weighted average B-factor per residue. The column labelled 'Q < 0.9' lists the number of (and percentage) of residues with an average occupancy less than 0.9.

| Mol | Chain | Analysed       | <RSRZ> | #RSRZ>2       | OWAB(Å <sup>2</sup> ) | Q<0.9 |
|-----|-------|----------------|--------|---------------|-----------------------|-------|
| 1   | A     | 238/257 (92%)  | 0.24   | 7 (2%) 51 54  | 16, 32, 63, 79        | 0     |
| 1   | B     | 220/257 (85%)  | 0.16   | 5 (2%) 60 64  | 15, 29, 59, 97        | 0     |
| 1   | C     | 239/257 (92%)  | 0.18   | 8 (3%) 46 49  | 15, 29, 59, 83        | 0     |
| 1   | D     | 209/257 (81%)  | 0.18   | 9 (4%) 35 37  | 16, 29, 60, 77        | 0     |
| All | All   | 906/1028 (88%) | 0.19   | 29 (3%) 47 50 | 15, 30, 61, 97        | 0     |

All (29) RSRZ outliers are listed below:

| Mol | Chain | Res | Type | RSRZ |
|-----|-------|-----|------|------|
| 1   | D     | 546 | ALA  | 4.6  |
| 1   | A     | 530 | CYS  | 4.4  |
| 1   | A     | 417 | CYS  | 3.8  |
| 1   | D     | 468 | SER  | 3.6  |
| 1   | D     | 469 | LEU  | 3.6  |
| 1   | A     | 526 | TYR  | 3.6  |
| 1   | A     | 469 | LEU  | 3.5  |
| 1   | B     | 417 | CYS  | 3.1  |
| 1   | D     | 425 | PHE  | 3.0  |
| 1   | C     | 417 | CYS  | 3.0  |
| 1   | B     | 425 | PHE  | 3.0  |
| 1   | D     | 421 | MET  | 2.9  |
| 1   | C     | 464 | SER  | 2.7  |
| 1   | C     | 527 | SER  | 2.7  |
| 1   | C     | 331 | TYR  | 2.5  |
| 1   | C     | 420 | GLY  | 2.5  |
| 1   | A     | 527 | SER  | 2.5  |
| 1   | C     | 531 | LYS  | 2.4  |
| 1   | D     | 544 | LEU  | 2.4  |
| 1   | C     | 526 | TYR  | 2.3  |
| 1   | A     | 528 | MET  | 2.3  |

*Continued on next page...*

Continued from previous page...

| Mol | Chain | Res | Type | RSRZ |
|-----|-------|-----|------|------|
| 1   | B     | 546 | ALA  | 2.2  |
| 1   | D     | 526 | TYR  | 2.2  |
| 1   | D     | 524 | HIS  | 2.2  |
| 1   | A     | 332 | ASP  | 2.2  |
| 1   | B     | 501 | HIS  | 2.1  |
| 1   | B     | 463 | SER  | 2.1  |
| 1   | D     | 461 | PHE  | 2.1  |
| 1   | C     | 532 | ASN  | 2.0  |

## 6.2 Non-standard residues in protein, DNA, RNA chains [i](#)

There are no non-standard protein/DNA/RNA residues in this entry.

## 6.3 Carbohydrates [i](#)

There are no monosaccharides in this entry.

## 6.4 Ligands [i](#)

In the following table, the Atoms column lists the number of modelled atoms in the group and the number defined in the chemical component dictionary. The B-factors column lists the minimum, median, 95<sup>th</sup> percentile and maximum values of B factors of atoms in the group. The column labelled 'Q< 0.9' lists the number of atoms with occupancy less than 0.9.

| Mol | Type | Chain | Res | Atoms | RSCC | RSR  | B-factors(Å <sup>2</sup> ) | Q<0.9 |
|-----|------|-------|-----|-------|------|------|----------------------------|-------|
| 2   | LIG  | E     | 4   | 37/?  | 0.78 | 0.19 | 36,60,105,107              | 0     |
| 2   | LIG  | E     | 10  | 33/?  | 0.82 | 0.20 | 33,60,139,170              | 0     |
| 2   | LIG  | E     | 9   | 25/?  | 0.85 | 0.17 | 28,41,61,94                | 0     |
| 2   | LIG  | E     | 11  | 33/?  | 0.87 | 0.19 | 28,47,103,106              | 0     |

The following is a graphical depiction of the model fit to experimental electron density of all instances of the Ligand of Interest. In addition, ligands with molecular weight > 250 and outliers as shown on the geometry validation Tables will also be included. Each fit is shown from different orientation to approximate a three-dimensional view.

**Electron density around LIG E 4:**

$2mF_o-DF_c$  (at 0.7 rmsd) in gray  
 $mF_o-DF_c$  (at 3 rmsd) in purple (negative)  
and green (positive)

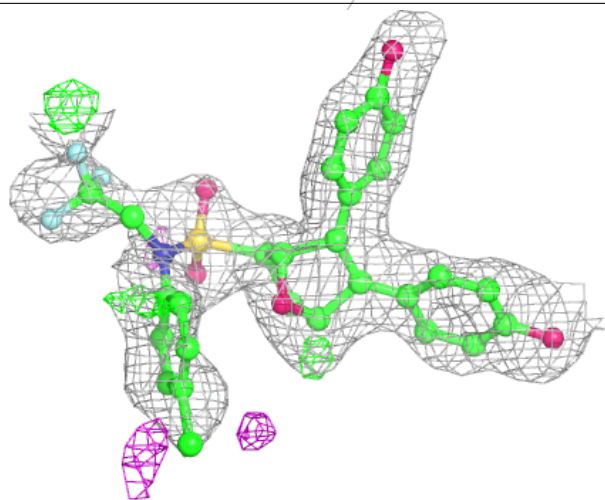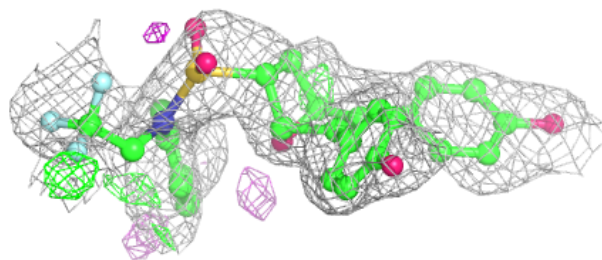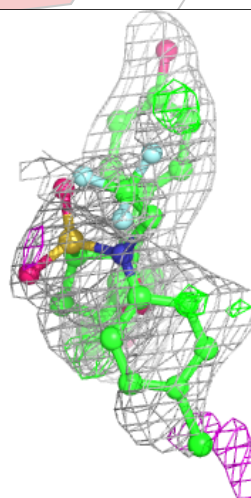

PRELIMINARY

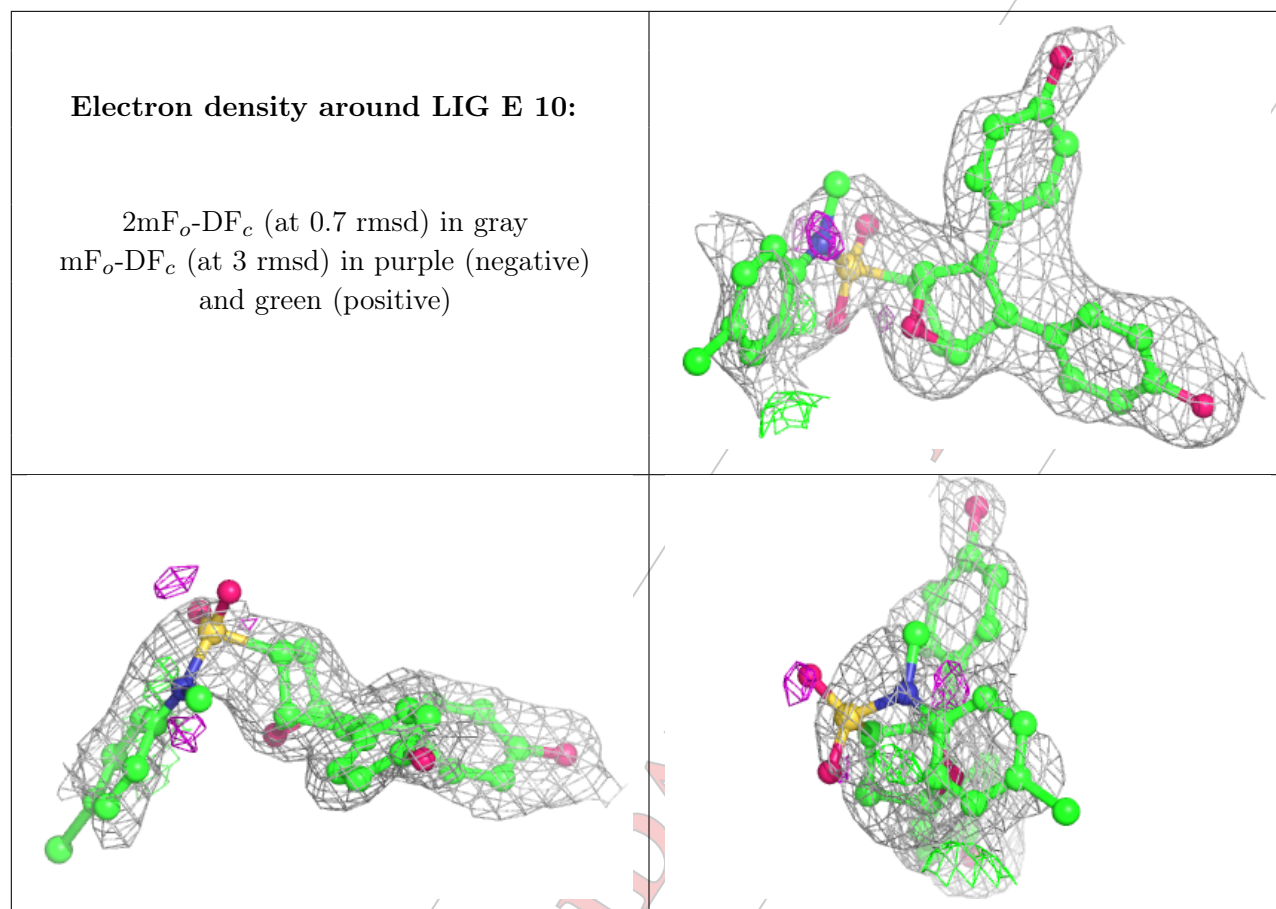

PRELIMINARY VALIDATION

**Electron density around LIG E 9:**

$2mF_o-DF_c$  (at 0.7 rmsd) in gray  
 $mF_o-DF_c$  (at 3 rmsd) in purple (negative)  
and green (positive)

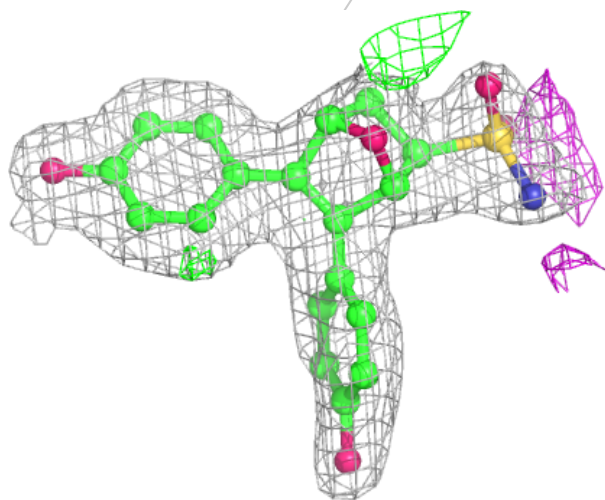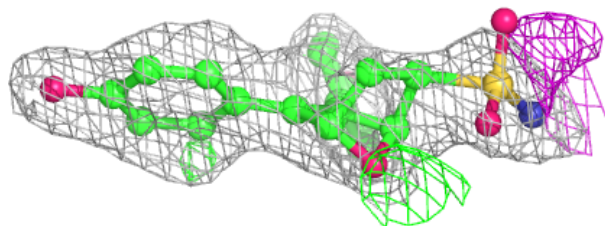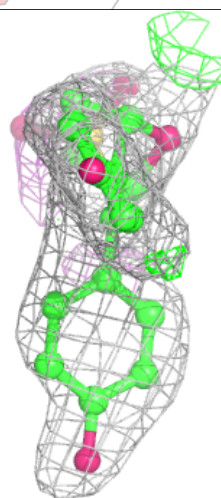

PRELIMINARY



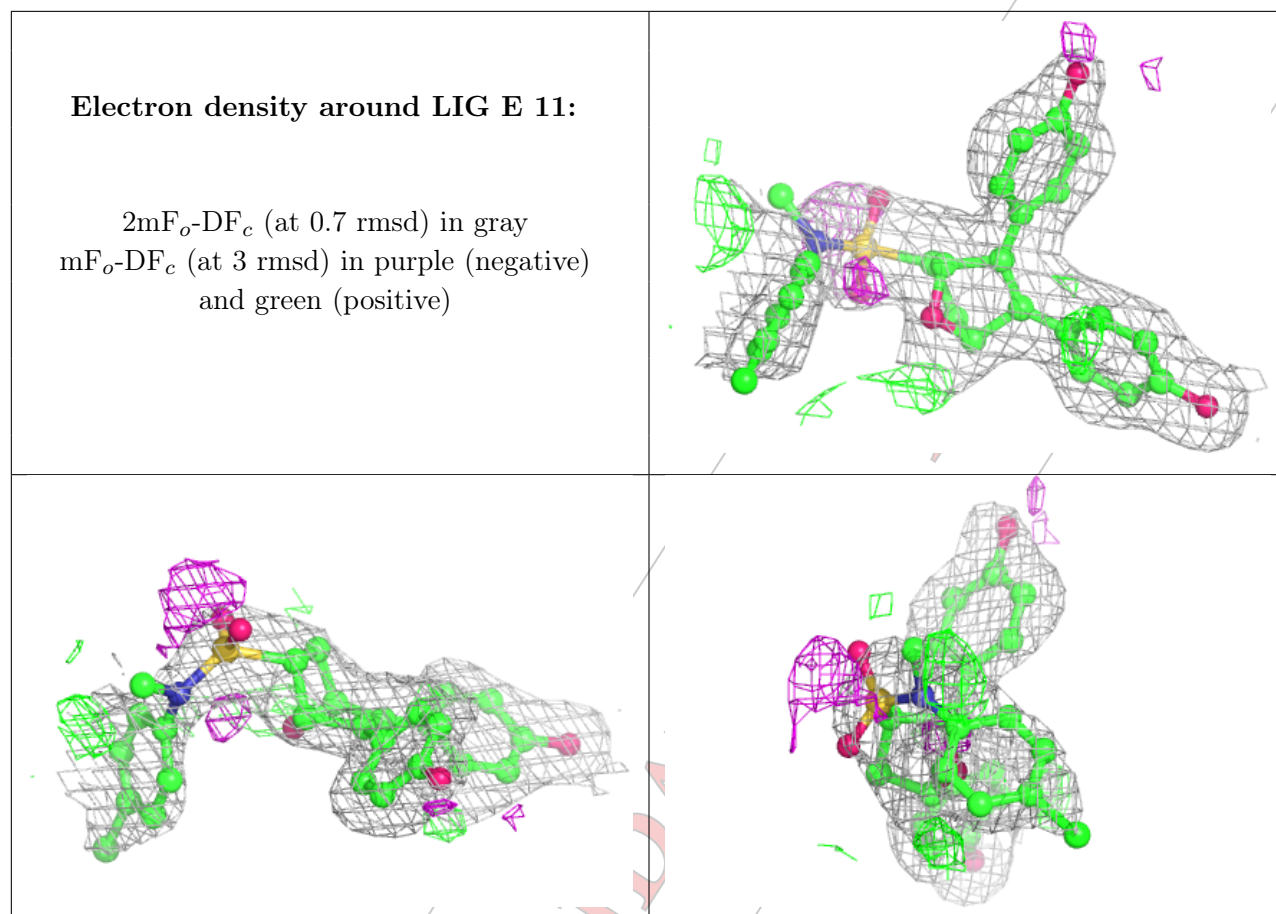

## 6.5 Other polymers [i](#)

There are no such residues in this entry.

PRELIMINARY

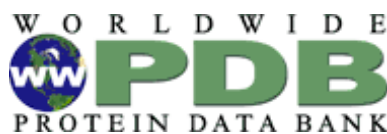

# Preliminary Full wwPDB X-ray Structure Validation Report ⓘ

Aug 9, 2020 – 04:50 PM EDT

Deposition ID : D\_1000251198

This is a Preliminary Full wwPDB X-ray Structure Validation Report.

This report is produced by the wwPDB Deposition System during initial deposition but before annotation of the structure.

We welcome your comments at [validation@mail.wwpdb.org](mailto:validation@mail.wwpdb.org)

A user guide is available at

<https://www.wwpdb.org/validation/2017/XrayValidationReportHelp>

with specific help available everywhere you see the ⓘ symbol.

---

The following versions of software and data (see [references ⓘ](#)) were used in the production of this report:

|                                |   |                                                                    |
|--------------------------------|---|--------------------------------------------------------------------|
| MolProbity                     | : | 4.02b-467                                                          |
| Mogul                          | : | 1.8.5 (274361), CSD as541be (2020)                                 |
| Xtriage (Phenix)               | : | 1.13                                                               |
| EDS                            | : | 2.13.1                                                             |
| buster-report                  | : | 1.1.7 (2018)                                                       |
| Percentile statistics          | : | 20191225.v01 (using entries in the PDB archive December 25th 2019) |
| Refmac                         | : | 5.8.0158                                                           |
| CCP4                           | : | 7.0.044 (Gargrove)                                                 |
| Ideal geometry (proteins)      | : | Engh & Huber (2001)                                                |
| Ideal geometry (DNA, RNA)      | : | Parkinson et al. (1996)                                            |
| Validation Pipeline (wwPDB-VP) | : | 2.13.1                                                             |

# 1 Overall quality at a glance i

The following experimental techniques were used to determine the structure:  
*X-RAY DIFFRACTION*

The reported resolution of this entry is 1.78 Å.

Percentile scores (ranging between 0-100) for global validation metrics of the entry are shown in the following graphic. The table shows the number of entries on which the scores are based.

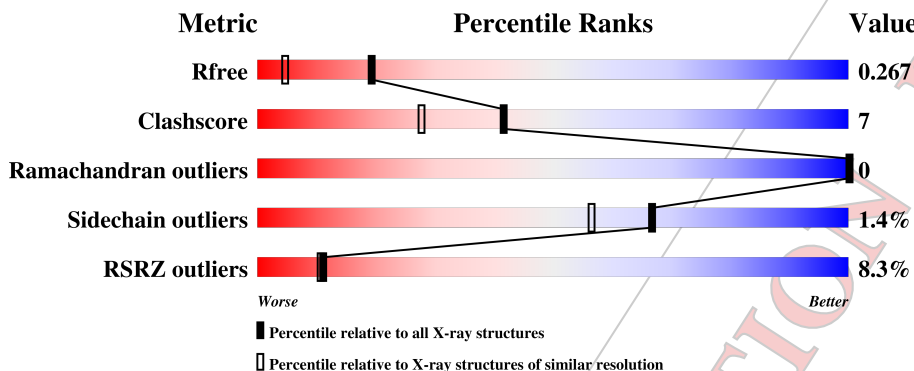

| Metric                | Whole archive<br>(#Entries) | Similar resolution<br>(#Entries, resolution range(Å)) |
|-----------------------|-----------------------------|-------------------------------------------------------|
| $R_{free}$            | 130704                      | 9185 (1.80-1.76)                                      |
| Clashscore            | 141614                      | 10184 (1.80-1.76)                                     |
| Ramachandran outliers | 138981                      | 10051 (1.80-1.76)                                     |
| Sidechain outliers    | 138945                      | 10050 (1.80-1.76)                                     |
| RSRZ outliers         | 127900                      | 9032 (1.80-1.76)                                      |

The table below summarises the geometric issues observed across the polymeric chains and their fit to the electron density. The red, orange, yellow and green segments on the lower bar indicate the fraction of residues that contain outliers for  $\geq 3$ , 2, 1 and 0 types of geometric quality criteria respectively. A grey segment represents the fraction of residues that are not modelled. The numeric value for each fraction is indicated below the corresponding segment, with a dot representing fractions  $\leq 5\%$ . The upper red bar (where present) indicates the fraction of residues that have poor fit to the electron density. The numeric value is given above the bar.

| Mol | Chain | Length | Quality of chain                                                                                                                                                                                                                                                                                                                                                                                            |
|-----|-------|--------|-------------------------------------------------------------------------------------------------------------------------------------------------------------------------------------------------------------------------------------------------------------------------------------------------------------------------------------------------------------------------------------------------------------|
| 1   | A     | 257    | <div style="display: flex; align-items: center;"> <div style="width: 8%; height: 10px; background-color: red; margin-right: 5px;"></div> <div style="width: 77%; height: 10px; background-color: green; margin-right: 5px;"></div> <div style="width: 13%; height: 10px; background-color: yellow; margin-right: 5px;"></div> <div style="width: 9%; height: 10px; background-color: grey;"></div> </div>   |
| 1   | B     | 257    | <div style="display: flex; align-items: center;"> <div style="width: 11%; height: 10px; background-color: red; margin-right: 5px;"></div> <div style="width: 74%; height: 10px; background-color: green; margin-right: 5px;"></div> <div style="width: 12%; height: 10px; background-color: yellow; margin-right: 5px;"></div> <div style="width: 14%; height: 10px; background-color: grey;"></div> </div> |
| 1   | C     | 257    | <div style="display: flex; align-items: center;"> <div style="width: 6%; height: 10px; background-color: red; margin-right: 5px;"></div> <div style="width: 76%; height: 10px; background-color: green; margin-right: 5px;"></div> <div style="width: 14%; height: 10px; background-color: yellow; margin-right: 5px;"></div> <div style="width: 9%; height: 10px; background-color: grey;"></div> </div>   |
| 1   | D     | 257    | <div style="display: flex; align-items: center;"> <div style="width: 5%; height: 10px; background-color: red; margin-right: 5px;"></div> <div style="width: 75%; height: 10px; background-color: green; margin-right: 5px;"></div> <div style="width: 9%; height: 10px; background-color: yellow; margin-right: 5px;"></div> <div style="width: 16%; height: 10px; background-color: grey;"></div> </div>   |

The following table lists non-polymeric compounds, carbohydrate monomers and non-standard

residues in protein, DNA, RNA chains that are outliers for geometric or electron-density-fit criteria:

| Mol | Type | Chain | Res | Chirality | Geometry | Clashes | Electron density |
|-----|------|-------|-----|-----------|----------|---------|------------------|
| 2   | LIG  | E     | 1   | -         | -        | X       | -                |
| 2   | LIG  | E     | 3   | -         | -        | X       | -                |

PRELIMINARY VALIDATION REPORT

## 2 Entry composition i

There are 4 unique types of molecules in this entry. The entry contains 7846 atoms, of which 0 are hydrogens and 0 are deuteriums.

In the tables below, the ZeroOcc column contains the number of atoms modelled with zero occupancy, the AltConf column contains the number of residues with at least one atom in alternate conformation and the Trace column contains the number of residues modelled with at most 2 atoms.

- Molecule 1 is a protein called Estrogen Receptor.

| Mol | Chain | Residues | Atoms |      |     |     |    | ZeroOcc | AltConf | Trace |
|-----|-------|----------|-------|------|-----|-----|----|---------|---------|-------|
|     |       |          | Total | C    | N   | O   | S  |         |         |       |
| 1   | A     | 235      | Total | C    | N   | O   | S  | 0       | 0       | 0     |
|     |       |          | 1873  | 1199 | 316 | 341 | 17 |         |         |       |
| 1   | B     | 220      | Total | C    | N   | O   | S  | 0       | 0       | 0     |
|     |       |          | 1767  | 1137 | 297 | 318 | 15 |         |         |       |
| 1   | C     | 234      | Total | C    | N   | O   | S  | 0       | 1       | 0     |
|     |       |          | 1877  | 1198 | 319 | 341 | 19 |         |         |       |
| 1   | D     | 216      | Total | C    | N   | O   | S  | 0       | 0       | 0     |
|     |       |          | 1726  | 1108 | 293 | 309 | 16 |         |         |       |

- Molecule 2 is a ligand with the chemical component id LIG but its atom names do not match the existing wwPDB Chemical Component Dictionary definition for LIG. Consequently no firm identification of ligand chemistry can be made. Once the structure is annotated then an identification and diagram will be given here.

| Mol | Chain | Residues | Atoms |    |   |   |   | ZeroOcc | AltConf |   |
|-----|-------|----------|-------|----|---|---|---|---------|---------|---|
|     |       |          | Total | C  | F | N | O |         |         | S |
| 2   | E     | 1        | Total | C  | F | N | O | S       | 0       | 0 |
|     |       |          | 45    | 33 | 3 | 2 | 6 | 1       |         |   |
| 2   | E     | 1        | Total | C  | F | N | O | S       | 0       | 0 |
|     |       |          | 37    | 26 | 3 | 1 | 6 | 1       |         |   |
| 2   | E     | 1        | Total | C  | F | N | O | S       | 0       | 0 |
|     |       |          | 45    | 33 | 3 | 2 | 6 | 1       |         |   |
| 2   | E     | 1        | Total | C  | F | N | O | S       | 0       | 0 |
|     |       |          | 37    | 26 | 3 | 1 | 6 | 1       |         |   |

- Molecule 3 is CHLORIDE ION (three-letter code: CL) (formula: Cl).

| Mol | Chain | Residues | Atoms | ZeroOcc | AltConf |   |
|-----|-------|----------|-------|---------|---------|---|
| 3   | F     | 1        | Total | Cl      | 0       | 0 |
|     |       |          | 1     | 1       |         |   |
| 3   | F     | 1        | Total | Cl      | 0       | 0 |
|     |       |          | 1     | 1       |         |   |

- Molecule 4 is water.

| Mol | Chain | Residues | Atoms        |          | ZeroOcc | AltConf |
|-----|-------|----------|--------------|----------|---------|---------|
| 4   | S     | 437      | Total<br>437 | O<br>437 | 0       | 0       |

**PRELIMINARY VALIDATION REPORT**

### 3 Residue-property plots

These plots are drawn for all protein, RNA, DNA and oligosaccharide chains in the entry. The first graphic for a chain summarises the proportions of the various outlier classes displayed in the second graphic. The second graphic shows the sequence view annotated by issues in geometry and electron density. Residues are color-coded according to the number of geometric quality criteria for which they contain at least one outlier: green = 0, yellow = 1, orange = 2 and red = 3 or more. A red dot above a residue indicates a poor fit to the electron density ( $RSRZ > 2$ ). Stretches of 2 or more consecutive residues without any outlier are shown as a green connector. Residues present in the sample, but not in the model, are shown in grey.

- Molecule 1: Estrogen Receptor

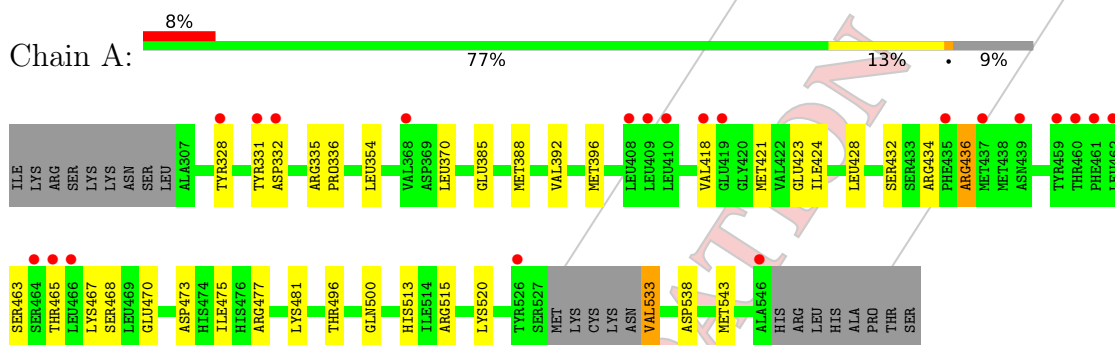

- Molecule 1: Estrogen Receptor

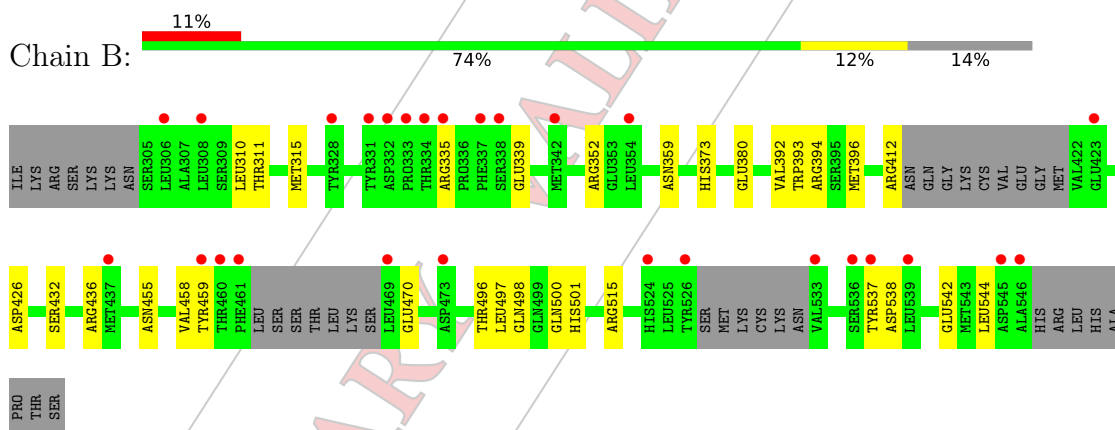

- Molecule 1: Estrogen Receptor

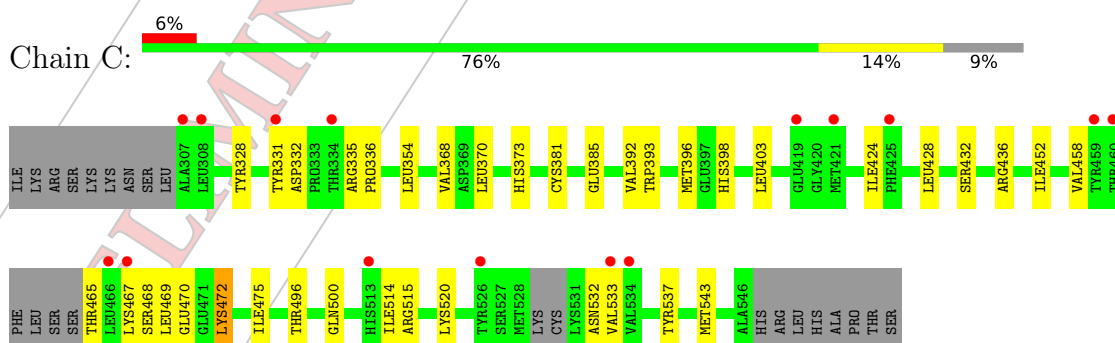

- Molecule 1: Estrogen Receptor

Chain D:  5% 75% 9% 16%

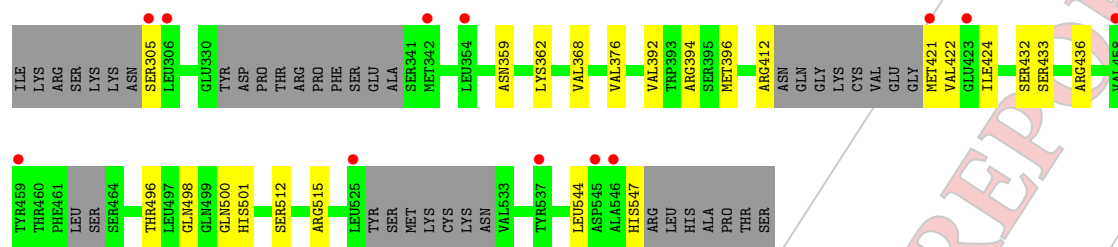

PRELIMINARY VALIDATION REPORT



## 4 Data and refinement statistics i

| Property                                                                | Value                                                       | Source           |
|-------------------------------------------------------------------------|-------------------------------------------------------------|------------------|
| Space group                                                             | P 1                                                         | Depositor        |
| Cell constants<br>a, b, c, $\alpha$ , $\beta$ , $\gamma$                | 53.78Å 58.75Å 94.44Å<br>86.91° 74.81° 62.77°                | Depositor        |
| Resolution (Å)                                                          | 52.14 – 1.78<br>52.08 – 1.78                                | Depositor<br>EDS |
| % Data completeness<br>(in resolution range)                            | 87.0 (52.14-1.78)<br>81.2 (52.08-1.78)                      | Depositor<br>EDS |
| $R_{merge}$                                                             | (Not available)                                             | Depositor        |
| $R_{sym}$                                                               | (Not available)                                             | Depositor        |
| $\langle I/\sigma(I) \rangle$ <sup>1</sup>                              | 2.18 (at 1.78Å)                                             | Xtrriage         |
| Refinement program                                                      | REFMAC 5.8.0258                                             | Depositor        |
| R, $R_{free}$                                                           | 0.236 , 0.265<br>0.243 , 0.267                              | Depositor<br>DCC |
| $R_{free}$ test set                                                     | 3961 reflections (4.81%)                                    | wwPDB-VP         |
| Wilson B-factor (Å <sup>2</sup> )                                       | 25.5                                                        | Xtrriage         |
| Anisotropy                                                              | 0.211                                                       | Xtrriage         |
| Bulk solvent $k_{sol}$ (e/Å <sup>3</sup> ), $B_{sol}$ (Å <sup>2</sup> ) | 0.32 , 29.6                                                 | EDS              |
| L-test for twinning <sup>2</sup>                                        | $\langle  L  \rangle = 0.47$ , $\langle L^2 \rangle = 0.29$ | Xtrriage         |
| Estimated twinning fraction                                             | 0.197 for h,h-k,h-l                                         | Xtrriage         |
| $F_o, F_c$ correlation                                                  | 0.94                                                        | EDS              |
| Total number of atoms                                                   | 7846                                                        | wwPDB-VP         |
| Average B, all atoms (Å <sup>2</sup> )                                  | 36.0                                                        | wwPDB-VP         |

Xtrriage's analysis on translational NCS is as follows: *The largest off-origin peak in the Patterson function is 7.40% of the height of the origin peak. No significant pseudotranslation is detected.*

<sup>1</sup>Intensities estimated from amplitudes.

<sup>2</sup>Theoretical values of  $\langle |L| \rangle$ ,  $\langle L^2 \rangle$  for acentric reflections are 0.5, 0.333 respectively for untwinned datasets, and 0.375, 0.2 for perfectly twinned datasets.

## 5 Model quality [i](#)

### 5.1 Standard geometry [i](#)

Bond lengths and bond angles in the following residue types are not validated in this section: LIG, YCM, CL

The Z score for a bond length (or angle) is the number of standard deviations the observed value is removed from the expected value. A bond length (or angle) with  $|Z| > 5$  is considered an outlier worth inspection. RMSZ is the root-mean-square of all Z scores of the bond lengths (or angles).

| Mol | Chain | Bond lengths |         | Bond angles |                |
|-----|-------|--------------|---------|-------------|----------------|
|     |       | RMSZ         | # Z  >5 | RMSZ        | # Z  >5        |
| 1   | A     | 0.58         | 0/1897  | 0.74        | 4/2564 (0.2%)  |
| 1   | B     | 0.58         | 0/1789  | 0.82        | 5/2418 (0.2%)  |
| 1   | C     | 0.57         | 0/1889  | 0.73        | 0/2550         |
| 1   | D     | 0.57         | 0/1743  | 0.76        | 4/2350 (0.2%)  |
| All | All   | 0.57         | 0/7318  | 0.76        | 13/9882 (0.1%) |

There are no bond length outliers.

All (13) bond angle outliers are listed below:

| Mol | Chain | Res | Type | Atoms     | Z     | Observed(°) | Ideal(°) |
|-----|-------|-----|------|-----------|-------|-------------|----------|
| 1   | D     | 394 | ARG  | NE-CZ-NH1 | 7.60  | 124.10      | 120.30   |
| 1   | B     | 515 | ARG  | NE-CZ-NH2 | -7.43 | 116.58      | 120.30   |
| 1   | D     | 515 | ARG  | NE-CZ-NH2 | -7.43 | 116.58      | 120.30   |
| 1   | D     | 515 | ARG  | NE-CZ-NH1 | 6.81  | 123.70      | 120.30   |
| 1   | B     | 515 | ARG  | NE-CZ-NH1 | 6.76  | 123.68      | 120.30   |
| 1   | B     | 394 | ARG  | NE-CZ-NH1 | 6.45  | 123.53      | 120.30   |
| 1   | A     | 515 | ARG  | NE-CZ-NH1 | 5.74  | 123.17      | 120.30   |
| 1   | A     | 515 | ARG  | NE-CZ-NH2 | -5.73 | 117.44      | 120.30   |
| 1   | B     | 352 | ARG  | NE-CZ-NH1 | 5.67  | 123.13      | 120.30   |
| 1   | A     | 538 | ASP  | CB-CG-OD1 | -5.59 | 113.26      | 118.30   |
| 1   | B     | 426 | ASP  | CB-CG-OD2 | 5.40  | 123.16      | 118.30   |
| 1   | A     | 436 | ARG  | NE-CZ-NH2 | -5.29 | 117.65      | 120.30   |
| 1   | D     | 394 | ARG  | NE-CZ-NH2 | -5.03 | 117.79      | 120.30   |

There are no chirality outliers.

There are no planarity outliers.

## 5.2 Too-close contacts [i](#)

In the following table, the Non-H and H(model) columns list the number of non-hydrogen atoms and hydrogen atoms in the chain respectively. The H(added) column lists the number of hydrogen atoms added and optimized by MolProbity. The Clashes column lists the number of clashes within the asymmetric unit, whereas Symm-Clashes lists symmetry related clashes.

| Mol | Chain | Non-H | H(model) | H(added) | Clashes | Symm-Clashes |
|-----|-------|-------|----------|----------|---------|--------------|
| 1   | A     | 1873  | 0        | 1909     | 40      | 2            |
| 1   | B     | 1767  | 0        | 1799     | 25      | 2            |
| 1   | C     | 1877  | 0        | 1913     | 33      | 1            |
| 1   | D     | 1726  | 0        | 1774     | 12      | 1            |
| 2   | E     | 164   | 0        | 4        | 16      | 0            |
| 3   | F     | 2     | 0        | 0        | 0       | 0            |
| 4   | S     | 437   | 0        | 0        | 11      | 0            |
| All | All   | 7846  | 0        | 7399     | 104     | 3            |

The all-atom clashscore is defined as the number of clashes found per 1000 atoms (including hydrogen atoms). The all-atom clashscore for this structure is 7.

All (104) close contacts within the same asymmetric unit are listed below, sorted by their clash magnitude.

| Atom-1           | Atom-2           | Interatomic distance (Å) | Clash overlap (Å) |
|------------------|------------------|--------------------------|-------------------|
| 1:B:310:LEU:HB3  | 4:S:394:HOH:O    | 1.58                     | 1.01              |
| 1:C:385:GLU:HG3  | 1:C:514:ILE:HG22 | 1.41                     | 1.00              |
| 1:A:428:LEU:HD12 | 2:E:1:LIG:F02    | 1.59                     | 0.90              |
| 1:B:311:THR:O    | 4:S:394:HOH:O    | 1.89                     | 0.89              |
| 1:C:428:LEU:HD12 | 2:E:3:LIG:F02    | 1.68                     | 0.83              |
| 1:C:385:GLU:HG3  | 1:C:514:ILE:CG2  | 2.09                     | 0.83              |
| 1:A:513:HIS:CD2  | 1:B:459:TYR:CD2  | 2.69                     | 0.81              |
| 1:B:335:ARG:HB3  | 1:B:339:GLU:OE1  | 1.86                     | 0.76              |
| 1:A:418:VAL:HG11 | 1:A:421:MET:CE   | 2.16                     | 0.75              |
| 1:C:458:VAL:HG22 | 1:C:472:LYS:HE3  | 1.69                     | 0.75              |
| 1:A:424:ILE:HB   | 2:E:1:LIG:HC22   | 1.69                     | 0.74              |
| 1:C:370:LEU:HD21 | 1:C:475:ILE:HD11 | 1.69                     | 0.73              |
| 1:A:513:HIS:NE2  | 1:B:459:TYR:CD2  | 2.58                     | 0.72              |
| 1:A:424:ILE:HD11 | 1:A:520:LYS:HB3  | 1.75                     | 0.68              |
| 1:A:370:LEU:HD21 | 1:A:475:ILE:HD11 | 1.74                     | 0.68              |
| 1:C:465:THR:HG23 | 1:C:468:SER:H    | 1.58                     | 0.67              |
| 1:C:424:ILE:HD11 | 1:C:520:LYS:HB3  | 1.76                     | 0.67              |
| 1:A:428:LEU:CD1  | 2:E:1:LIG:F02    | 2.32                     | 0.67              |
| 1:B:542:GLU:OE2  | 4:S:401:HOH:O    | 2.13                     | 0.67              |
| 1:C:424:ILE:HB   | 2:E:3:LIG:HC22   | 1.76                     | 0.66              |

*Continued on next page...*

Continued from previous page...

| Atom-1           | Atom-2           | Interatomic distance (Å) | Clash overlap (Å) |
|------------------|------------------|--------------------------|-------------------|
| 1:C:385:GLU:HG2  | 1:C:452:ILE:HD13 | 1.76                     | 0.66              |
| 1:A:370:LEU:HD11 | 1:A:475:ILE:HD11 | 1.77                     | 0.65              |
| 1:A:465:THR:HG23 | 1:A:468:SER:H    | 1.61                     | 0.65              |
| 1:C:385:GLU:CG   | 1:C:514:ILE:HG22 | 2.21                     | 0.64              |
| 1:A:513:HIS:NE2  | 1:B:459:TYR:HD2  | 1.95                     | 0.64              |
| 1:A:473:ASP:OD1  | 1:A:477:ARG:NH1  | 2.31                     | 0.63              |
| 1:C:370:LEU:HD11 | 1:C:475:ILE:HD11 | 1.80                     | 0.63              |
| 1:C:396:MET:O    | 1:C:436:ARG:HD3  | 1.99                     | 0.62              |
| 1:D:359:ASN:OD1  | 1:D:547:HIS:ND1  | 2.33                     | 0.61              |
| 1:A:388:MET:HE2  | 2:E:1:LIG:S01    | 2.41                     | 0.61              |
| 1:C:428:LEU:CD1  | 2:E:3:LIG:F02    | 2.39                     | 0.61              |
| 1:D:376:VAL:HG22 | 1:D:544:LEU:HD12 | 1.83                     | 0.61              |
| 1:A:396:MET:O    | 1:A:436:ARG:HD3  | 2.01                     | 0.61              |
| 1:C:467:LYS:O    | 1:C:470:GLU:HG2  | 2.01                     | 0.60              |
| 1:A:467:LYS:O    | 1:A:470:GLU:HG2  | 2.01                     | 0.60              |
| 1:B:396:MET:O    | 1:B:436:ARG:HD3  | 2.02                     | 0.59              |
| 1:A:533:VAL:HG23 | 2:E:1:LIG:O06    | 2.03                     | 0.59              |
| 1:A:388:MET:HE2  | 2:E:1:LIG:O05    | 2.04                     | 0.58              |
| 1:A:418:VAL:HG13 | 1:A:421:MET:CB   | 2.33                     | 0.58              |
| 1:C:370:LEU:HD21 | 1:C:475:ILE:CD1  | 2.33                     | 0.58              |
| 1:A:418:VAL:CG1  | 1:A:421:MET:SD   | 2.92                     | 0.58              |
| 1:C:424:ILE:HD12 | 2:E:3:LIG:C23    | 2.36                     | 0.56              |
| 1:A:513:HIS:CD2  | 1:B:459:TYR:CE2  | 2.94                     | 0.56              |
| 1:B:380:GLU:OE1  | 4:S:289:HOH:O    | 2.18                     | 0.55              |
| 1:A:385:GLU:OE1  | 4:S:211:HOH:O    | 2.18                     | 0.55              |
| 1:A:428:LEU:HD11 | 2:E:1:LIG:O04    | 2.05                     | 0.55              |
| 1:A:424:ILE:CB   | 2:E:1:LIG:HC22   | 2.36                     | 0.53              |
| 1:A:424:ILE:HD12 | 2:E:1:LIG:C23    | 2.38                     | 0.53              |
| 1:C:373:HIS:HD2  | 1:C:537:TYR:OH   | 1.92                     | 0.53              |
| 1:B:393:TRP:HE3  | 1:B:396:MET:HE1  | 1.74                     | 0.53              |
| 1:D:368:VAL:HG22 | 4:S:5:HOH:O      | 2.08                     | 0.53              |
| 1:B:393:TRP:CE3  | 1:B:396:MET:CE   | 2.93                     | 0.51              |
| 1:C:424:ILE:CB   | 2:E:3:LIG:HC22   | 2.41                     | 0.51              |
| 1:B:315:MET:N    | 4:S:394:HOH:O    | 2.42                     | 0.51              |
| 1:C:370:LEU:CD2  | 1:C:475:ILE:HD11 | 2.39                     | 0.50              |
| 1:C:515:ARG:HD3  | 1:D:512:SER:O    | 2.12                     | 0.50              |
| 1:B:393:TRP:CE3  | 1:B:396:MET:HE1  | 2.47                     | 0.49              |
| 1:A:434:ARG:NH1  | 4:S:242:HOH:O    | 2.40                     | 0.49              |
| 1:A:331:TYR:CE2  | 1:A:332:ASP:HB2  | 2.47                     | 0.49              |
| 1:A:467:LYS:HA   | 1:A:470:GLU:OE2  | 2.12                     | 0.48              |
| 1:A:418:VAL:HG13 | 1:A:421:MET:HB2  | 1.94                     | 0.48              |

Continued on next page...

Continued from previous page...

| Atom-1             | Atom-2            | Interatomic distance (Å) | Clash overlap (Å) |
|--------------------|-------------------|--------------------------|-------------------|
| 1:D:305:SER:N      | 4:S:314:HOH:O     | 2.46                     | 0.48              |
| 1:C:331:TYR:CE2    | 1:C:332:ASP:HB2   | 2.48                     | 0.48              |
| 1:B:373:HIS:NE2    | 1:B:537:TYR:OH    | 2.43                     | 0.47              |
| 1:D:392:VAL:HG13   | 1:D:432:SER:HA    | 1.97                     | 0.47              |
| 1:A:418:VAL:HG11   | 1:A:421:MET:SD    | 2.54                     | 0.47              |
| 1:C:381[B]:YCM:NZ2 | 1:C:381[B]:YCM:HA | 2.30                     | 0.47              |
| 1:C:496:THR:O      | 1:C:500:GLN:HG3   | 2.15                     | 0.46              |
| 1:B:310:LEU:CB     | 4:S:394:HOH:O     | 2.38                     | 0.46              |
| 1:D:498:GLN:HA     | 1:D:501:HIS:CE1   | 2.51                     | 0.46              |
| 1:C:424:ILE:HD11   | 1:C:520:LYS:CB    | 2.45                     | 0.46              |
| 1:A:370:LEU:HD21   | 1:A:475:ILE:CD1   | 2.42                     | 0.46              |
| 1:B:392:VAL:HG13   | 1:B:432:SER:HA    | 1.98                     | 0.45              |
| 1:B:498:GLN:HA     | 1:B:501:HIS:CE1   | 2.51                     | 0.45              |
| 1:D:421:MET:SD     | 1:D:424:ILE:HG13  | 2.56                     | 0.45              |
| 1:A:496:THR:O      | 1:A:500:GLN:HG3   | 2.16                     | 0.45              |
| 1:A:513:HIS:HE1    | 1:B:455:ASN:O     | 1.99                     | 0.45              |
| 1:B:496:THR:O      | 1:B:500:GLN:HG3   | 2.16                     | 0.45              |
| 1:A:423:GLU:N      | 1:A:423:GLU:OE1   | 2.49                     | 0.45              |
| 2:E:1:LIG:C12      | 2:E:1:LIG:C07     | 2.94                     | 0.44              |
| 1:C:398:HIS:CE1    | 1:C:403:LEU:HD12  | 2.51                     | 0.44              |
| 1:C:370:LEU:CD1    | 1:C:475:ILE:HD11  | 2.46                     | 0.44              |
| 1:C:354:LEU:HD23   | 1:C:543:MET:HE1   | 1.99                     | 0.44              |
| 2:E:3:LIG:C13      | 2:E:3:LIG:C07     | 2.95                     | 0.44              |
| 1:A:513:HIS:CE1    | 1:B:459:TYR:HD2   | 2.37                     | 0.43              |
| 1:A:513:HIS:NE2    | 1:B:459:TYR:CE2   | 2.86                     | 0.43              |
| 1:D:496:THR:O      | 1:D:500:GLN:HG3   | 2.19                     | 0.42              |
| 1:B:458:VAL:HG13   | 1:B:459:TYR:CD2   | 2.55                     | 0.42              |
| 1:D:396:MET:O      | 1:D:436:ARG:NE    | 2.48                     | 0.42              |
| 1:D:362:LYS:HG3    | 1:D:547:HIS:CD2   | 2.55                     | 0.41              |
| 1:A:392:VAL:HG13   | 1:A:432:SER:HA    | 2.01                     | 0.41              |
| 1:A:335:ARG:HA     | 1:A:336:PRO:C     | 2.39                     | 0.41              |
| 1:C:335:ARG:HA     | 1:C:336:PRO:C     | 2.40                     | 0.41              |
| 1:C:465:THR:CG2    | 1:C:468:SER:HB3   | 2.51                     | 0.41              |
| 1:C:458:VAL:CG2    | 1:C:472:LYS:HE3   | 2.46                     | 0.41              |
| 1:B:393:TRP:CE3    | 1:B:396:MET:HE3   | 2.56                     | 0.41              |
| 1:C:393:TRP:CE3    | 1:C:396:MET:SD    | 3.14                     | 0.41              |
| 1:A:354:LEU:HD23   | 1:A:543:MET:HE1   | 2.02                     | 0.41              |
| 1:C:368:VAL:HG22   | 4:S:405:HOH:O     | 2.21                     | 0.41              |
| 1:D:362:LYS:HE2    | 1:D:544:LEU:HD22  | 2.04                     | 0.41              |
| 1:A:463:SER:HA     | 1:A:468:SER:OG    | 2.21                     | 0.40              |
| 1:A:370:LEU:CD1    | 1:A:475:ILE:HD11  | 2.48                     | 0.40              |

Continued on next page...

Continued from previous page...

| Atom-1           | Atom-2           | Interatomic distance (Å) | Clash overlap (Å) |
|------------------|------------------|--------------------------|-------------------|
| 1:B:497:LEU:HA   | 1:B:497:LEU:HD23 | 1.92                     | 0.40              |
| 1:C:392:VAL:HG13 | 1:C:432:SER:HA   | 2.02                     | 0.40              |

All (3) symmetry-related close contacts are listed below. The label for Atom-2 includes the symmetry operator and encoded unit-cell translations to be applied.

| Atom-1         | Atom-2                 | Interatomic distance (Å) | Clash overlap (Å) |
|----------------|------------------------|--------------------------|-------------------|
| 1:A:481:LYS:NZ | 1:B:538:ASP:OD2[1_655] | 1.76                     | 0.44              |
| 1:A:328:TYR:OH | 1:B:359:ASN:ND2[1_565] | 1.85                     | 0.35              |
| 1:C:328:TYR:OH | 1:D:359:ASN:ND2[1_645] | 2.04                     | 0.16              |

### 5.3 Torsion angles [i](#)

#### 5.3.1 Protein backbone [i](#)

In the following table, the Percentiles column shows the percent Ramachandran outliers of the chain as a percentile score with respect to all X-ray entries followed by that with respect to entries of similar resolution.

The Analysed column shows the number of residues for which the backbone conformation was analysed, and the total number of residues.

| Mol | Chain | Analysed       | Favoured   | Allowed | Outliers | Percentiles |     |
|-----|-------|----------------|------------|---------|----------|-------------|-----|
| 1   | A     | 230/257 (90%)  | 226 (98%)  | 4 (2%)  | 0        | 100         | 100 |
| 1   | B     | 211/257 (82%)  | 210 (100%) | 1 (0%)  | 0        | 100         | 100 |
| 1   | C     | 227/257 (88%)  | 225 (99%)  | 2 (1%)  | 0        | 100         | 100 |
| 1   | D     | 205/257 (80%)  | 204 (100%) | 1 (0%)  | 0        | 100         | 100 |
| All | All   | 873/1028 (85%) | 865 (99%)  | 8 (1%)  | 0        | 100         | 100 |

There are no Ramachandran outliers to report.

#### 5.3.2 Protein sidechains [i](#)

In the following table, the Percentiles column shows the percent sidechain outliers of the chain as a percentile score with respect to all X-ray entries followed by that with respect to entries of similar resolution.

The Analysed column shows the number of residues for which the sidechain conformation was analysed, and the total number of residues.

| Mol | Chain | Analysed      | Rotameric  | Outliers | Percentiles |    |
|-----|-------|---------------|------------|----------|-------------|----|
| 1   | A     | 210/232 (90%) | 209 (100%) | 1 (0%)   | 88          | 86 |
| 1   | B     | 197/232 (85%) | 194 (98%)  | 3 (2%)   | 65          | 53 |
| 1   | C     | 209/232 (90%) | 205 (98%)  | 4 (2%)   | 57          | 43 |
| 1   | D     | 194/232 (84%) | 191 (98%)  | 3 (2%)   | 65          | 53 |
| All | All   | 810/928 (87%) | 799 (99%)  | 11 (1%)  | 67          | 56 |

All (11) residues with a non-rotameric sidechain are listed below:

| Mol | Chain | Res | Type |
|-----|-------|-----|------|
| 1   | A     | 533 | VAL  |
| 1   | B     | 412 | ARG  |
| 1   | B     | 470 | GLU  |
| 1   | B     | 544 | LEU  |
| 1   | C     | 469 | LEU  |
| 1   | C     | 472 | LYS  |
| 1   | C     | 532 | ASN  |
| 1   | C     | 533 | VAL  |
| 1   | D     | 412 | ARG  |
| 1   | D     | 422 | VAL  |
| 1   | D     | 433 | SER  |

Some sidechains can be flipped to improve hydrogen bonding and reduce clashes. All (16) such sidechains are listed below:

| Mol | Chain | Res | Type |
|-----|-------|-----|------|
| 1   | A     | 398 | HIS  |
| 1   | A     | 455 | ASN  |
| 1   | A     | 519 | ASN  |
| 1   | B     | 398 | HIS  |
| 1   | B     | 476 | HIS  |
| 1   | B     | 519 | ASN  |
| 1   | C     | 373 | HIS  |
| 1   | C     | 398 | HIS  |
| 1   | C     | 498 | GLN  |
| 1   | C     | 519 | ASN  |
| 1   | D     | 373 | HIS  |
| 1   | D     | 439 | ASN  |
| 1   | D     | 488 | HIS  |
| 1   | D     | 498 | GLN  |
| 1   | D     | 519 | ASN  |
| 1   | D     | 524 | HIS  |

### 5.3.3 RNA [i](#)

There are no RNA molecules in this entry.

### 5.4 Non-standard residues in protein, DNA, RNA chains [i](#)

There are no non-standard protein/DNA/RNA residues in this entry.

### 5.5 Carbohydrates [i](#)

There are no monosaccharides in this entry.

### 5.6 Ligand geometry [i](#)

Of 6 ligands modelled in this entry, 4 could not be matched to an existing wwPDB Chemical Component Dictionary definition at this stage and 2 are monoatomic - leaving 0 for Mogul analysis.

There are no bond length outliers.

There are no bond angle outliers.

There are no chirality outliers.

There are no torsion outliers.

There are no ring outliers.

No monomer is involved in short contacts.

The following is a two-dimensional graphical depiction of Mogul quality analysis of bond lengths, bond angles, torsion angles, and ring geometry for all instances of the Ligand of Interest. In addition, ligands with molecular weight  $> 250$  and outliers as shown on the validation Tables will also be included. For torsion angles, if less than 5% of the Mogul distribution of torsion angles is within 10 degrees of the torsion angle in question, then that torsion angle is considered an outlier. Any bond that is central to one or more torsion angles identified as an outlier by Mogul will be highlighted in the graph. For rings, the root-mean-square deviation (RMSD) between the ring in question and similar rings identified by Mogul is calculated over all ring torsion angles. If the average RMSD is greater than 60 degrees and the minimal RMSD between the ring in question and any Mogul-identified rings is also greater than 60 degrees, then that ring is considered an outlier. The outliers are highlighted in purple. The color gray indicates Mogul did not find sufficient equivalents in the CSD to analyse the geometry.



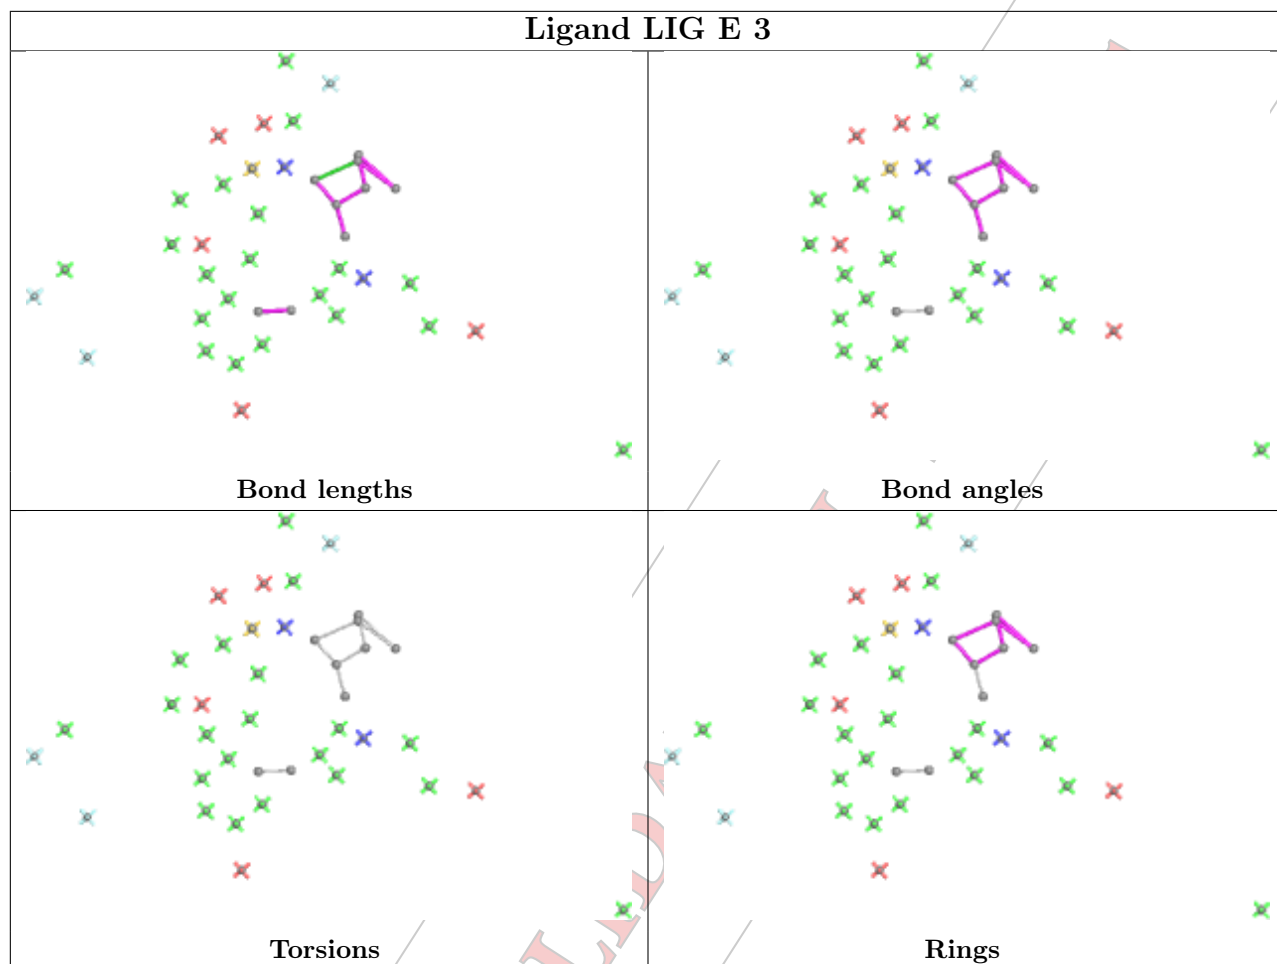

PRELIMINARY VALIDATION

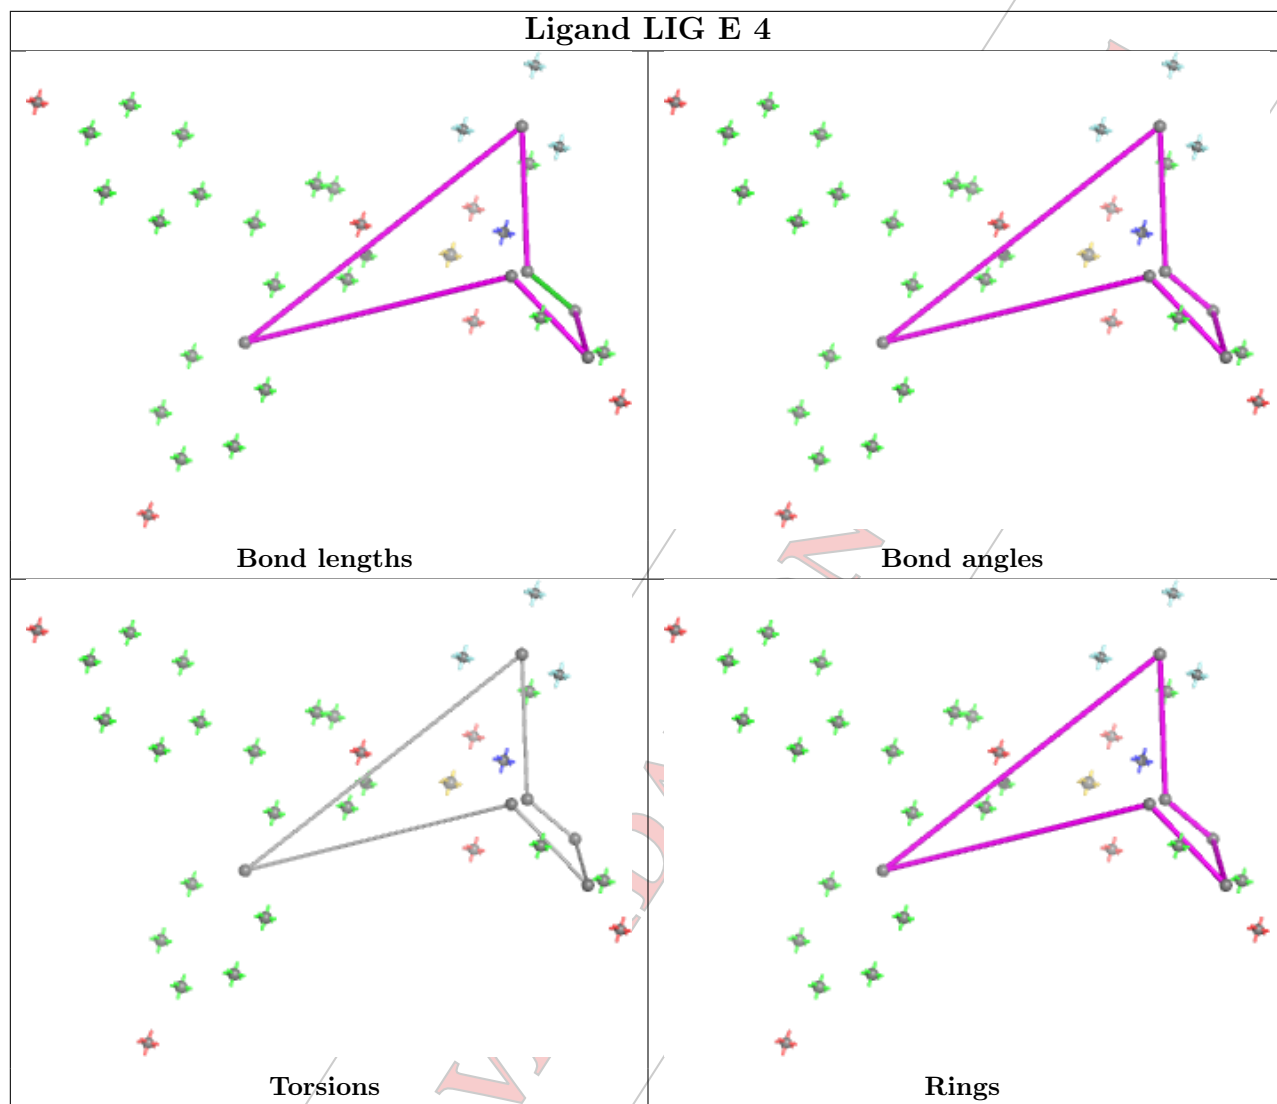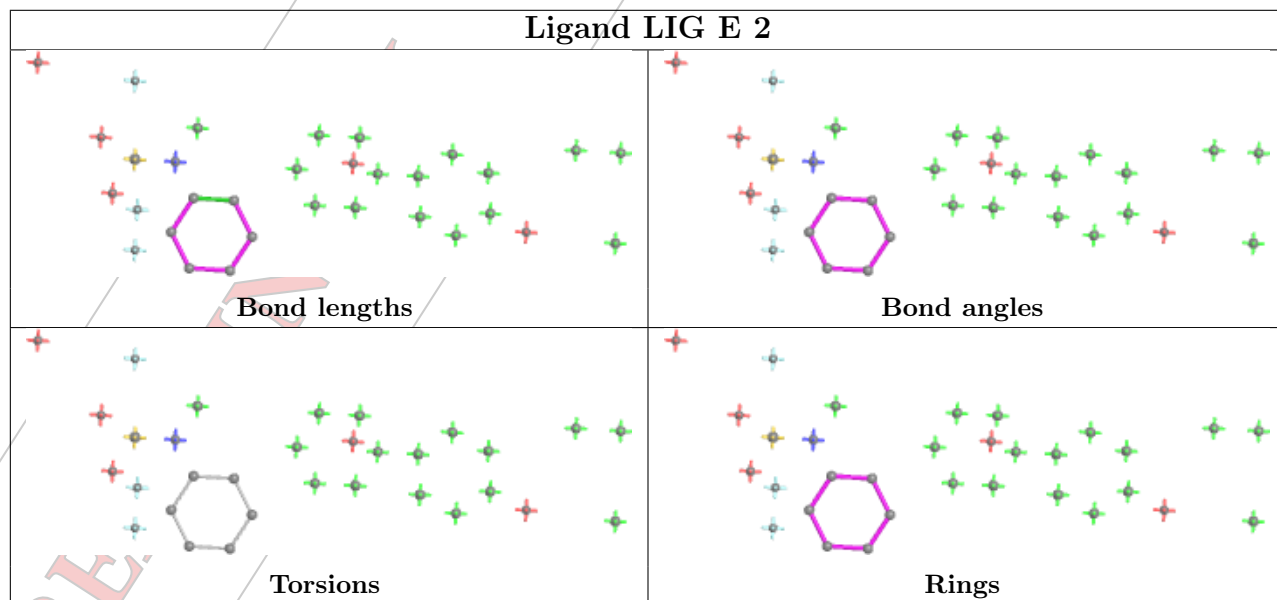

PRE

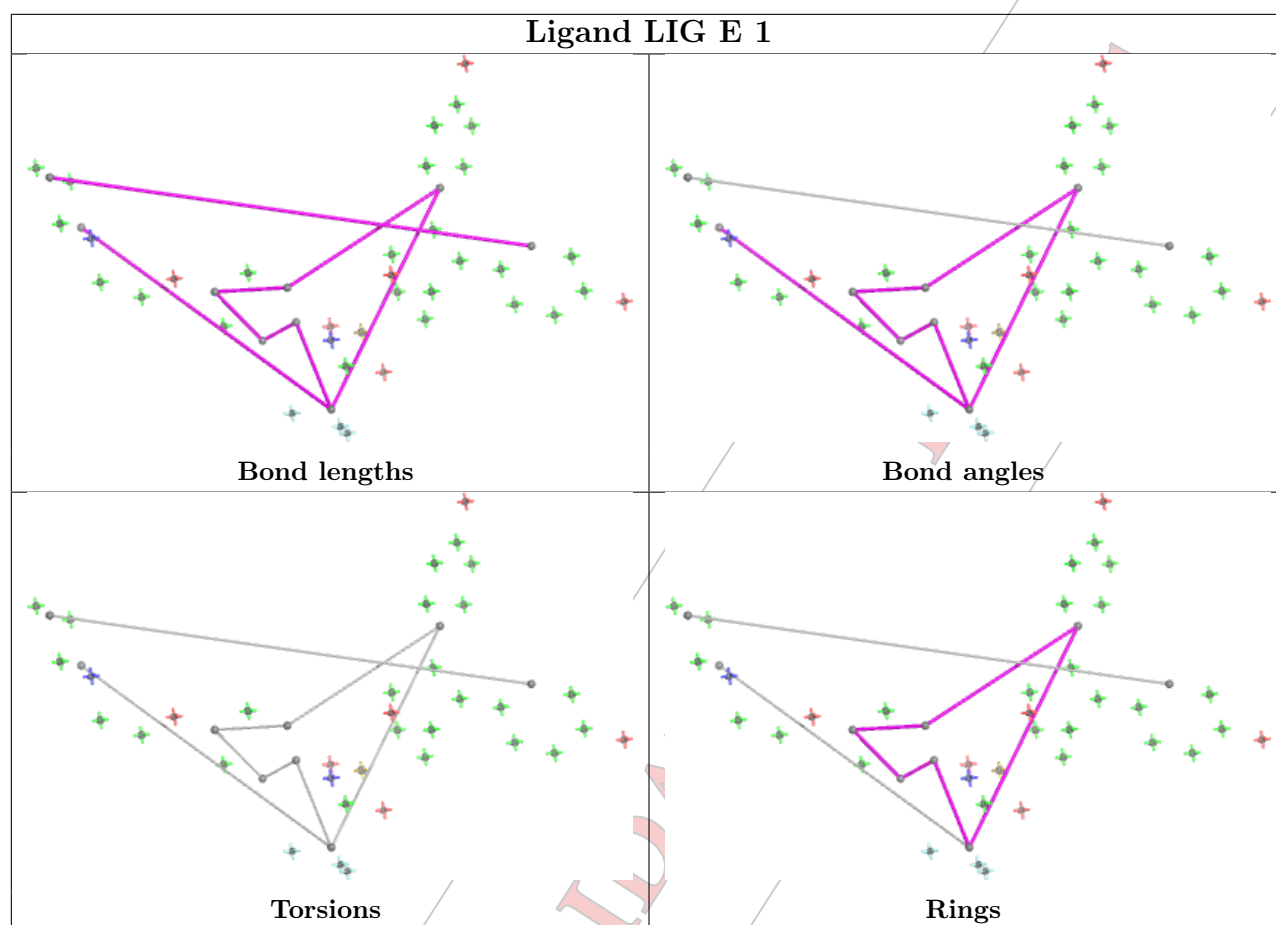

## 5.7 Other polymers [\(i\)](#)

There are no such residues in this entry.

## 5.8 Polymer linkage issues [\(i\)](#)

There are no chain breaks in this entry.

## 6 Fit of model and data i

### 6.1 Protein, DNA and RNA chains i

In the following table, the column labelled '#RSRZ > 2' contains the number (and percentage) of RSRZ outliers, followed by percent RSRZ outliers for the chain as percentile scores relative to all X-ray entries and entries of similar resolution. The OWAB column contains the minimum, median, 95<sup>th</sup> percentile and maximum values of the occupancy-weighted average B-factor per residue. The column labelled 'Q < 0.9' lists the number of (and percentage) of residues with an average occupancy less than 0.9.

| Mol | Chain | Analysed       | <RSRZ> | #RSRZ>2       | OWAB(Å <sup>2</sup> ) | Q<0.9 |
|-----|-------|----------------|--------|---------------|-----------------------|-------|
| 1   | A     | 234/257 (91%)  | 0.78   | 21 (8%) 9 9   | 19, 33, 64, 83        | 0     |
| 1   | B     | 219/257 (85%)  | 0.98   | 27 (12%) 4 4  | 19, 35, 56, 68        | 0     |
| 1   | C     | 233/257 (90%)  | 0.72   | 15 (6%) 19 18 | 20, 35, 58, 82        | 0     |
| 1   | D     | 215/257 (83%)  | 0.65   | 12 (5%) 24 23 | 20, 34, 53, 71        | 0     |
| All | All   | 901/1028 (87%) | 0.78   | 75 (8%) 11 11 | 19, 34, 57, 83        | 0     |

All (75) RSRZ outliers are listed below:

| Mol | Chain | Res | Type | RSRZ |
|-----|-------|-----|------|------|
| 1   | B     | 334 | THR  | 6.3  |
| 1   | C     | 466 | LEU  | 6.2  |
| 1   | B     | 337 | PHE  | 6.0  |
| 1   | A     | 462 | LEU  | 6.0  |
| 1   | B     | 333 | PRO  | 6.0  |
| 1   | B     | 331 | TYR  | 5.8  |
| 1   | B     | 461 | PHE  | 5.6  |
| 1   | B     | 459 | TYR  | 5.3  |
| 1   | A     | 526 | TYR  | 5.2  |
| 1   | B     | 524 | HIS  | 4.8  |
| 1   | A     | 460 | THR  | 4.6  |
| 1   | B     | 546 | ALA  | 4.6  |
| 1   | D     | 306 | LEU  | 4.5  |
| 1   | C     | 526 | TYR  | 4.4  |
| 1   | A     | 461 | PHE  | 4.4  |
| 1   | B     | 533 | VAL  | 4.1  |
| 1   | B     | 537 | TYR  | 4.1  |
| 1   | A     | 464 | SER  | 3.9  |
| 1   | D     | 342 | MET  | 3.9  |
| 1   | A     | 459 | TYR  | 3.8  |
| 1   | B     | 332 | ASP  | 3.8  |

*Continued on next page...*

*Continued from previous page...*

| Mol | Chain | Res | Type | RSRZ |
|-----|-------|-----|------|------|
| 1   | D     | 421 | MET  | 3.8  |
| 1   | C     | 331 | TYR  | 3.5  |
| 1   | A     | 331 | TYR  | 3.5  |
| 1   | A     | 418 | VAL  | 3.4  |
| 1   | B     | 536 | SER  | 3.4  |
| 1   | D     | 354 | LEU  | 3.4  |
| 1   | C     | 460 | THR  | 3.2  |
| 1   | C     | 425 | PHE  | 3.2  |
| 1   | B     | 342 | MET  | 3.2  |
| 1   | B     | 335 | ARG  | 3.2  |
| 1   | B     | 460 | THR  | 3.2  |
| 1   | A     | 332 | ASP  | 3.1  |
| 1   | C     | 307 | ALA  | 3.1  |
| 1   | A     | 408 | LEU  | 3.1  |
| 1   | B     | 545 | ASP  | 3.1  |
| 1   | B     | 338 | SER  | 3.1  |
| 1   | C     | 459 | TYR  | 3.0  |
| 1   | D     | 459 | TYR  | 2.9  |
| 1   | D     | 546 | ALA  | 2.9  |
| 1   | A     | 546 | ALA  | 2.8  |
| 1   | C     | 419 | GLU  | 2.7  |
| 1   | D     | 458 | VAL  | 2.6  |
| 1   | B     | 306 | LEU  | 2.6  |
| 1   | B     | 423 | GLU  | 2.5  |
| 1   | A     | 437 | MET  | 2.5  |
| 1   | C     | 334 | THR  | 2.5  |
| 1   | B     | 469 | LEU  | 2.5  |
| 1   | A     | 409 | LEU  | 2.5  |
| 1   | C     | 421 | MET  | 2.4  |
| 1   | D     | 545 | ASP  | 2.4  |
| 1   | A     | 435 | PHE  | 2.4  |
| 1   | B     | 437 | MET  | 2.4  |
| 1   | B     | 308 | LEU  | 2.3  |
| 1   | B     | 526 | TYR  | 2.3  |
| 1   | B     | 473 | ASP  | 2.3  |
| 1   | B     | 539 | LEU  | 2.3  |
| 1   | A     | 419 | GLU  | 2.3  |
| 1   | C     | 467 | LYS  | 2.3  |
| 1   | A     | 410 | LEU  | 2.2  |
| 1   | C     | 513 | HIS  | 2.2  |
| 1   | B     | 328 | TYR  | 2.2  |
| 1   | C     | 308 | LEU  | 2.2  |

*Continued on next page...*

Continued from previous page...

| Mol | Chain | Res | Type | RSRZ |
|-----|-------|-----|------|------|
| 1   | C     | 533 | VAL  | 2.2  |
| 1   | C     | 534 | VAL  | 2.2  |
| 1   | B     | 354 | LEU  | 2.2  |
| 1   | D     | 537 | TYR  | 2.1  |
| 1   | A     | 466 | LEU  | 2.1  |
| 1   | A     | 439 | ASN  | 2.1  |
| 1   | A     | 465 | THR  | 2.1  |
| 1   | D     | 423 | GLU  | 2.1  |
| 1   | D     | 525 | LEU  | 2.1  |
| 1   | A     | 328 | TYR  | 2.1  |
| 1   | D     | 305 | SER  | 2.1  |
| 1   | A     | 368 | VAL  | 2.0  |

## 6.2 Non-standard residues in protein, DNA, RNA chains [i](#)

There are no non-standard protein/DNA/RNA residues in this entry.

## 6.3 Carbohydrates [i](#)

There are no monosaccharides in this entry.

## 6.4 Ligands [i](#)

In the following table, the Atoms column lists the number of modelled atoms in the group and the number defined in the chemical component dictionary. The B-factors column lists the minimum, median, 95<sup>th</sup> percentile and maximum values of B factors of atoms in the group. The column labelled 'Q< 0.9' lists the number of atoms with occupancy less than 0.9.

| Mol | Type | Chain | Res | Atoms | RSCC | RSR  | B-factors(Å <sup>2</sup> ) | Q<0.9 |
|-----|------|-------|-----|-------|------|------|----------------------------|-------|
| 2   | LIG  | E     | 1   | 45/?  | 0.82 | 0.20 | 20,31,38,39                | 0     |
| 2   | LIG  | E     | 4   | 37/?  | 0.83 | 0.17 | 21,34,51,54                | 0     |
| 2   | LIG  | E     | 2   | 37/?  | 0.87 | 0.16 | 22,35,55,59                | 0     |
| 2   | LIG  | E     | 3   | 45/?  | 0.88 | 0.17 | 20,33,38,38                | 0     |
| 3   | CL   | F     | 1   | 1/?   | 0.96 | 0.05 | 26,26,26,26                | 0     |
| 3   | CL   | F     | 2   | 1/?   | 0.97 | 0.06 | 24,24,24,24                | 0     |

The following is a graphical depiction of the model fit to experimental electron density of all instances of the Ligand of Interest. In addition, ligands with molecular weight > 250 and outliers as shown on the geometry validation Tables will also be included. Each fit is shown from different orientation to approximate a three-dimensional view.

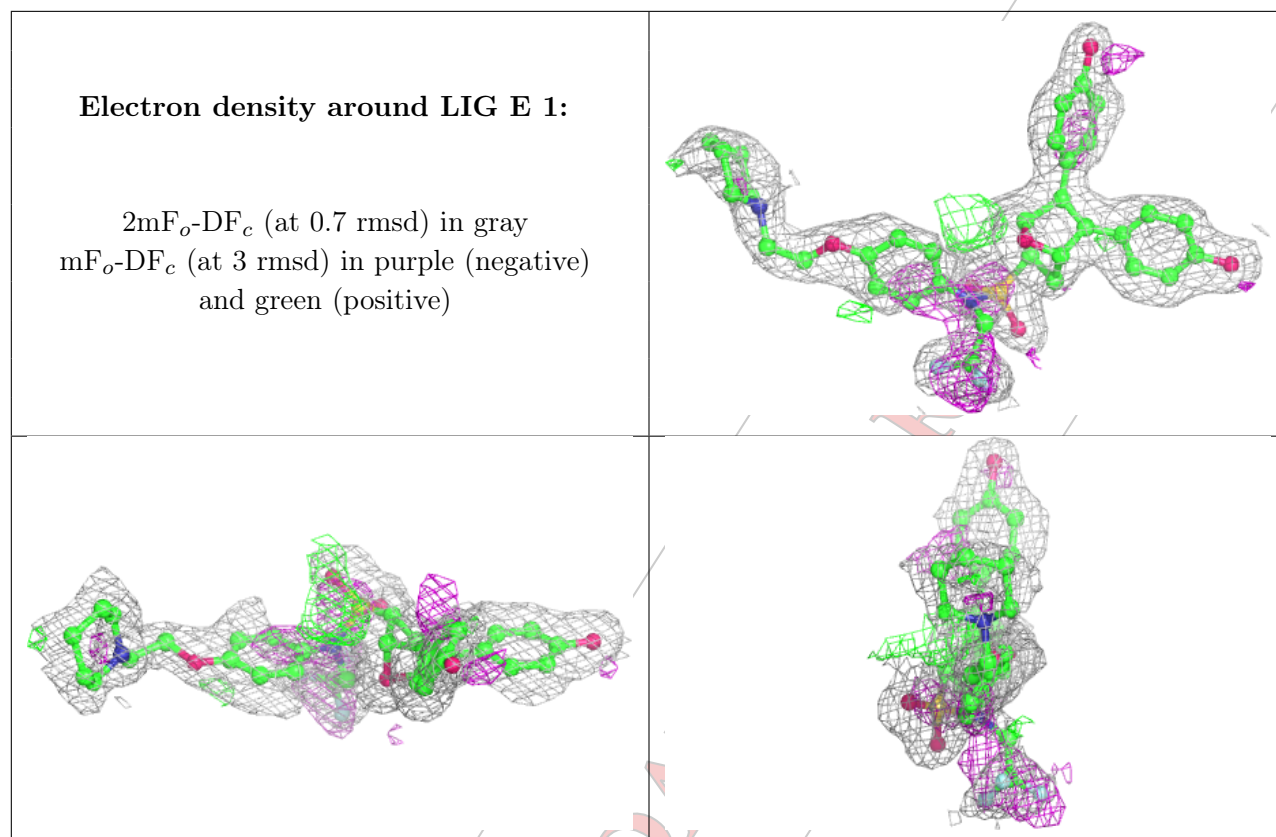

PRELIMINARY VALID

**Electron density around LIG E 4:**

$2mF_o-DF_c$  (at 0.7 rmsd) in gray  
 $mF_o-DF_c$  (at 3 rmsd) in purple (negative)  
and green (positive)

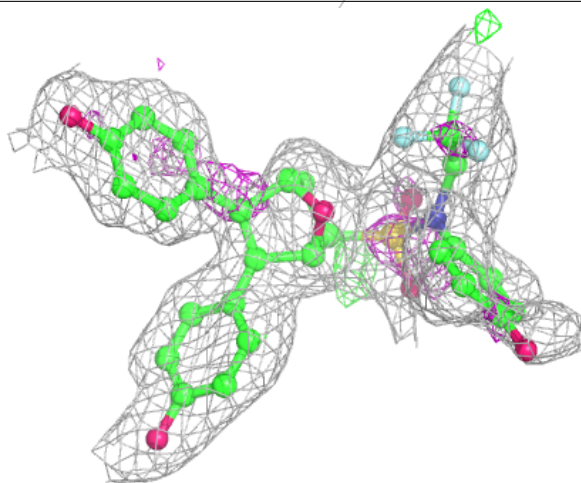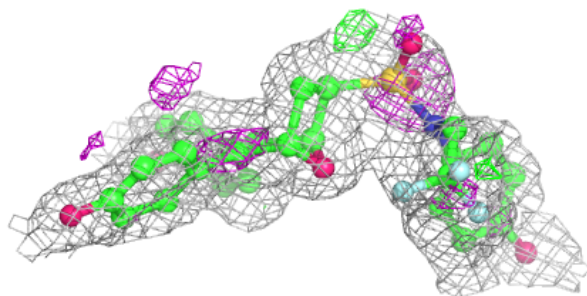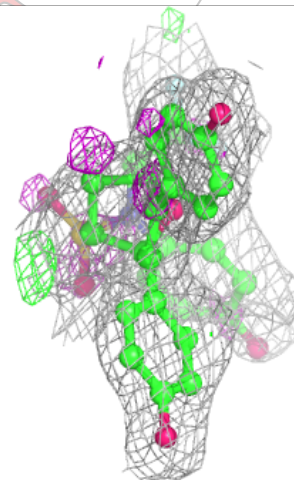

PRELIMINARY VALIDATION



**Electron density around LIG E 2:**

$2mF_o-DF_c$  (at 0.7 rmsd) in gray  
 $mF_o-DF_c$  (at 3 rmsd) in purple (negative)  
and green (positive)

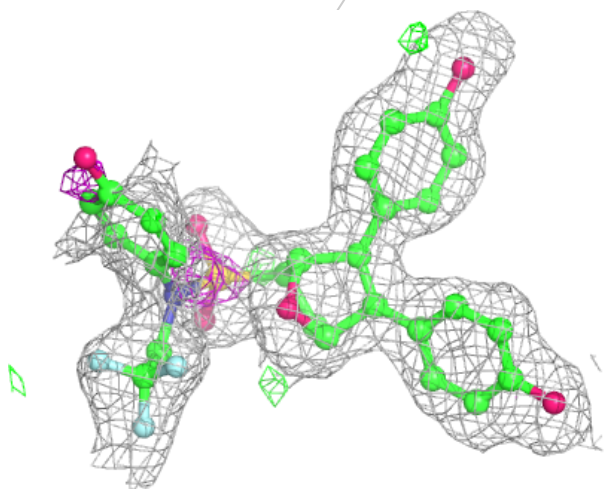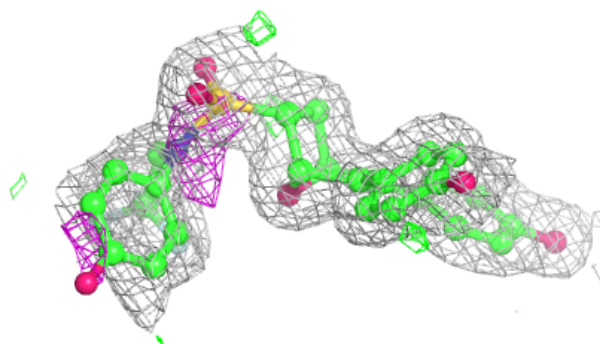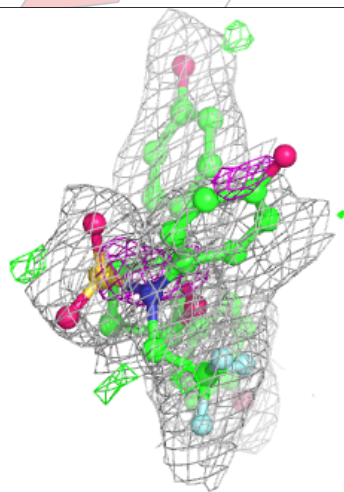

PRELIMINARY VIEW

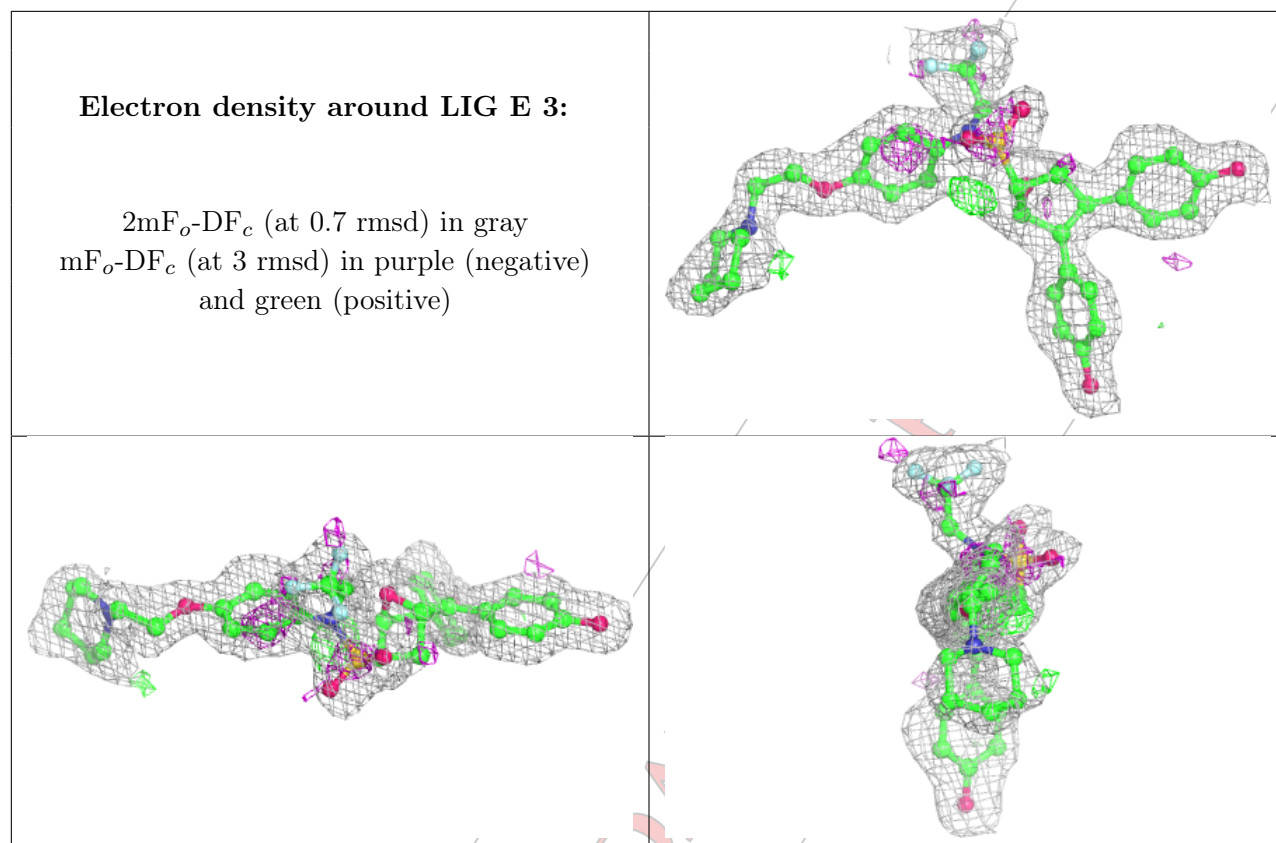

## 6.5 Other polymers [i](#)

There are no such residues in this entry.

PRELIMINARY VALID



# Preliminary Full wwPDB X-ray Structure Validation Report ⓘ

Aug 9, 2020 – 06:37 PM EDT

Deposition ID : D\_1000251211

This is a Preliminary Full wwPDB X-ray Structure Validation Report.

This report is produced by the wwPDB Deposition System during initial deposition but before annotation of the structure.

We welcome your comments at [validation@mail.wwpdb.org](mailto:validation@mail.wwpdb.org)

A user guide is available at

<https://www.wwpdb.org/validation/2017/XrayValidationReportHelp>

with specific help available everywhere you see the ⓘ symbol.

---

The following versions of software and data (see [references ⓘ](#)) were used in the production of this report:

|                                |   |                                                                    |
|--------------------------------|---|--------------------------------------------------------------------|
| MolProbity                     | : | 4.02b-467                                                          |
| Mogul                          | : | 1.8.5 (274361), CSD as541be (2020)                                 |
| Xtriage (Phenix)               | : | 1.13                                                               |
| EDS                            | : | 2.13.1                                                             |
| buster-report                  | : | 1.1.7 (2018)                                                       |
| Percentile statistics          | : | 20191225.v01 (using entries in the PDB archive December 25th 2019) |
| Refmac                         | : | 5.8.0158                                                           |
| CCP4                           | : | 7.0.044 (Gargrove)                                                 |
| Ideal geometry (proteins)      | : | Engh & Huber (2001)                                                |
| Ideal geometry (DNA, RNA)      | : | Parkinson et al. (1996)                                            |
| Validation Pipeline (wwPDB-VP) | : | 2.13.1                                                             |

# 1 Overall quality at a glance i

The following experimental techniques were used to determine the structure:  
*X-RAY DIFFRACTION*

The reported resolution of this entry is 1.87 Å.

Percentile scores (ranging between 0-100) for global validation metrics of the entry are shown in the following graphic. The table shows the number of entries on which the scores are based.

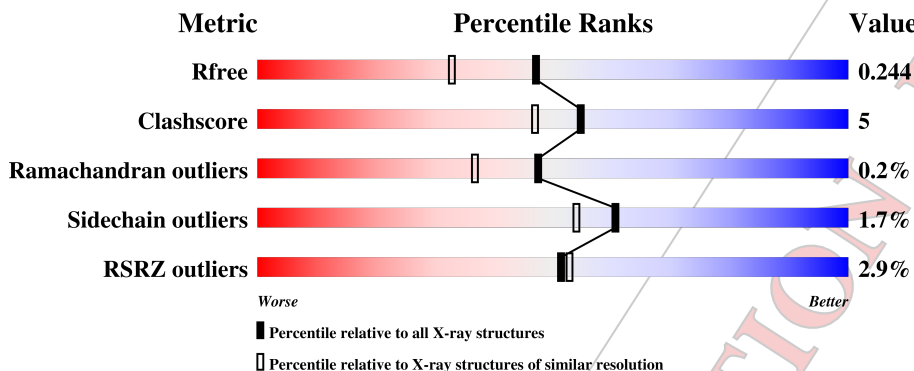

| Metric                | Whole archive<br>(#Entries) | Similar resolution<br>(#Entries, resolution range(Å)) |
|-----------------------|-----------------------------|-------------------------------------------------------|
| $R_{free}$            | 130704                      | 9470 (1.90-1.86)                                      |
| Clashscore            | 141614                      | 10282 (1.90-1.86)                                     |
| Ramachandran outliers | 138981                      | 10152 (1.90-1.86)                                     |
| Sidechain outliers    | 138945                      | 10152 (1.90-1.86)                                     |
| RSRZ outliers         | 127900                      | 9303 (1.90-1.86)                                      |

The table below summarises the geometric issues observed across the polymeric chains and their fit to the electron density. The red, orange, yellow and green segments on the lower bar indicate the fraction of residues that contain outliers for  $\geq 3$ , 2, 1 and 0 types of geometric quality criteria respectively. A grey segment represents the fraction of residues that are not modelled. The numeric value for each fraction is indicated below the corresponding segment, with a dot representing fractions  $\leq 5\%$ . The upper red bar (where present) indicates the fraction of residues that have poor fit to the electron density. The numeric value is given above the bar.

| Mol | Chain | Length | Quality of chain  |
|-----|-------|--------|-------------------|
| 1   | A     | 257    | <br>2% 84% 7% 9%  |
| 1   | B     | 257    | <br>3% 79% 5% 14% |
| 1   | C     | 257    | <br>2% 79% 9% 12% |
| 1   | D     | 257    | <br>4% 73% 8% 19% |

## 2 Entry composition i

There are 4 unique types of molecules in this entry. The entry contains 7470 atoms, of which 0 are hydrogens and 0 are deuteriums.

In the tables below, the ZeroOcc column contains the number of atoms modelled with zero occupancy, the AltConf column contains the number of residues with at least one atom in alternate conformation and the Trace column contains the number of residues modelled with at most 2 atoms.

- Molecule 1 is a protein called Estrogen Receptor.

| Mol | Chain | Residues | Atoms         |           |          |          |         | ZeroOcc | AltConf | Trace |
|-----|-------|----------|---------------|-----------|----------|----------|---------|---------|---------|-------|
|     |       |          | Total         | C         | N        | O        | S       |         |         |       |
| 1   | A     | 233      | Total<br>1843 | C<br>1176 | N<br>321 | O<br>329 | S<br>17 | 0       | 2       | 0     |
| 1   | B     | 221      | Total<br>1758 | C<br>1128 | N<br>304 | O<br>310 | S<br>16 | 0       | 2       | 0     |
| 1   | C     | 227      | Total<br>1834 | C<br>1173 | N<br>321 | O<br>323 | S<br>17 | 0       | 4       | 0     |
| 1   | D     | 209      | Total<br>1639 | C<br>1050 | N<br>280 | O<br>293 | S<br>16 | 0       | 0       | 0     |

- Molecule 2 is a ligand with the chemical component id LIG but its atom names do not match the existing wwPDB Chemical Component Dictionary definition for LIG. Consequently no firm identification of ligand chemistry can be made. Once the structure is annotated then an identification and diagram will be given here.

| Mol | Chain | Residues | Atoms       |         |        |        |        | ZeroOcc | AltConf |   |
|-----|-------|----------|-------------|---------|--------|--------|--------|---------|---------|---|
|     |       |          | Total       | C       | F      | N      | O      |         |         | S |
| 2   | E     | 1        | Total<br>46 | C<br>34 | F<br>3 | N<br>2 | O<br>6 | S<br>1  | 0       | 0 |
| 2   | E     | 1        | Total<br>37 | C<br>26 | F<br>3 | N<br>1 | O<br>6 | S<br>1  | 0       | 0 |
| 2   | E     | 1        | Total<br>46 | C<br>34 | F<br>3 | N<br>2 | O<br>6 | S<br>1  | 0       | 0 |
| 2   | E     | 1        | Total<br>46 | C<br>34 | F<br>3 | N<br>2 | O<br>6 | S<br>1  | 0       | 0 |

- Molecule 3 is CHLORIDE ION (three-letter code: CL) (formula: Cl).

| Mol | Chain | Residues | Atoms                 | ZeroOcc | AltConf |
|-----|-------|----------|-----------------------|---------|---------|
| 3   | F     | 1        | Total<br>1<br>Cl<br>1 | 0       | 0       |
| 3   | F     | 1        | Total<br>1<br>Cl<br>1 | 0       | 0       |

- Molecule 4 is water.

| Mol | Chain | Residues | Atoms        |          | ZeroOcc | AltConf |
|-----|-------|----------|--------------|----------|---------|---------|
| 4   | S     | 219      | Total<br>219 | O<br>219 | 0       | 0       |

**PRELIMINARY VALIDATION REPORT**

### 3 Residue-property plots [i](#)

These plots are drawn for all protein, RNA, DNA and oligosaccharide chains in the entry. The first graphic for a chain summarises the proportions of the various outlier classes displayed in the second graphic. The second graphic shows the sequence view annotated by issues in geometry and electron density. Residues are color-coded according to the number of geometric quality criteria for which they contain at least one outlier: green = 0, yellow = 1, orange = 2 and red = 3 or more. A red dot above a residue indicates a poor fit to the electron density ( $RSRZ > 2$ ). Stretches of 2 or more consecutive residues without any outlier are shown as a green connector. Residues present in the sample, but not in the model, are shown in grey.

- Molecule 1: Estrogen Receptor

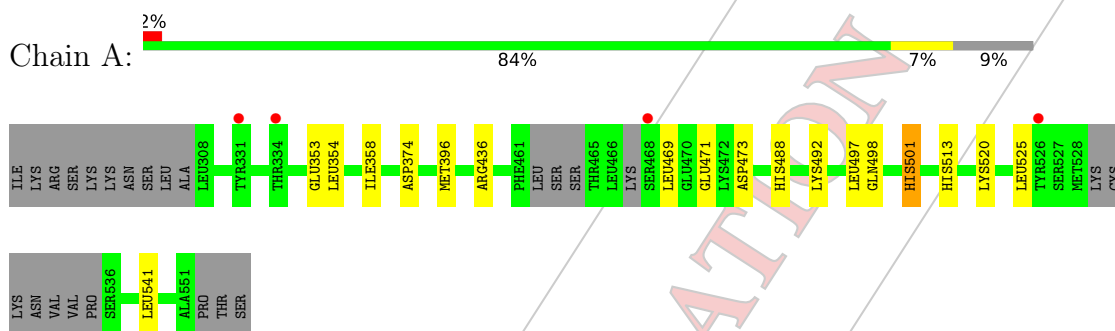

- Molecule 1: Estrogen Receptor

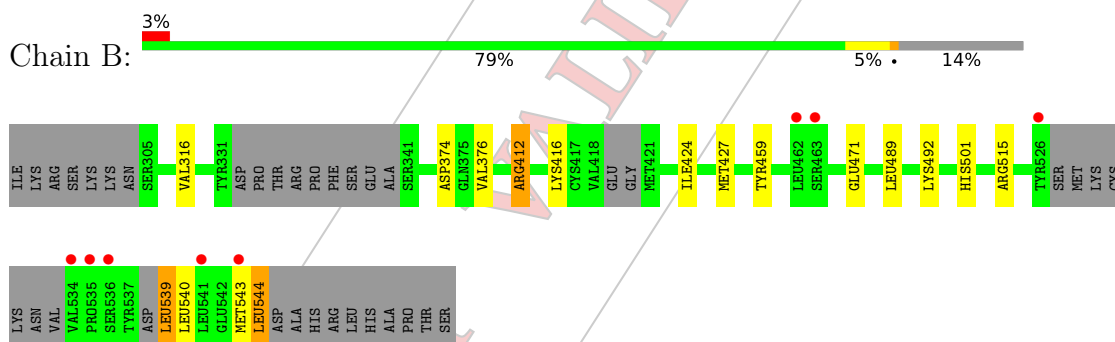

- Molecule 1: Estrogen Receptor

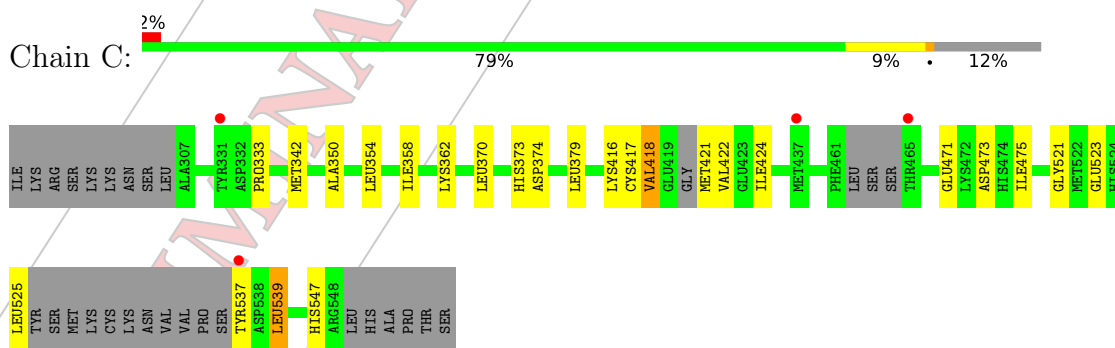

- Molecule 1: Estrogen Receptor

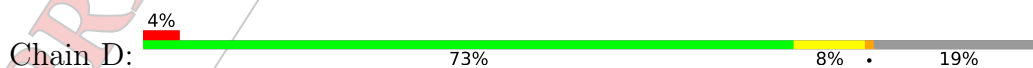

|        |        |
|--------|--------|
| ILE    | GLN498 |
| LYS    | HIS501 |
| ARG    | HIS516 |
| SER    | LYS520 |
| LYS    | HIS524 |
| ASN    | LEU525 |
| SER    | TYR526 |
| LEU306 | SER    |
| GLU330 | MET    |
| TYR    | LYS    |
| ASP    | CYS    |
| PRO    | LYS    |
| THR    | ASN    |
| ARG    | VAL    |
| PRO    | VAL    |
| PHE    | PRO535 |
| SER    | SER536 |
| GLU    | TYR537 |
| ALA    | ASP538 |
| SER341 | LEU    |
| HIS356 | LEU539 |
| ASP374 | LEU540 |
| GLN375 | GLU542 |
| VAL376 | MET543 |
| GLM414 | LEU544 |
| GLY    | ASP    |
| LYS    | ALA    |
| CYS    | HIS    |
| VAL    | ARG    |
| GLU    | LEU    |
| GLY420 | HIS    |
| MET421 | ALA    |
| VAL422 | PRO    |
| GLU423 | THR    |
| ILE424 | SER    |
| PHE425 |        |
| ASP426 |        |
| MET427 |        |
| MET437 |        |
| THR460 |        |
| PHE461 |        |
| LEU    |        |
| SER    |        |
| SER    |        |
| THR    |        |
| LEU    |        |
| LYS    |        |
| SER468 |        |
| GLU471 |        |
| HIS476 |        |

PRELIMINARY VALIDATION REPORT



## 4 Data and refinement statistics i

| Property                                                                | Value                                                       | Source           |
|-------------------------------------------------------------------------|-------------------------------------------------------------|------------------|
| Space group                                                             | P 1                                                         | Depositor        |
| Cell constants<br>a, b, c, $\alpha$ , $\beta$ , $\gamma$                | 53.42Å 59.12Å 93.52Å<br>86.54° 74.98° 63.19°                | Depositor        |
| Resolution (Å)                                                          | 90.13 – 1.87<br>90.13 – 1.87                                | Depositor<br>EDS |
| % Data completeness<br>(in resolution range)                            | 76.0 (90.13-1.87)<br>76.0 (90.13-1.87)                      | Depositor<br>EDS |
| $R_{merge}$                                                             | (Not available)                                             | Depositor        |
| $R_{sym}$                                                               | (Not available)                                             | Depositor        |
| $\langle I/\sigma(I) \rangle$ <sup>1</sup>                              | 2.04 (at 1.87Å)                                             | Xtrriage         |
| Refinement program                                                      | REFMAC 5.8.0253                                             | Depositor        |
| R, $R_{free}$                                                           | 0.207 , 0.236<br>0.218 , 0.244                              | Depositor<br>DCC |
| $R_{free}$ test set                                                     | 3095 reflections (5.00%)                                    | wwPDB-VP         |
| Wilson B-factor (Å <sup>2</sup> )                                       | 34.2                                                        | Xtrriage         |
| Anisotropy                                                              | 0.009                                                       | Xtrriage         |
| Bulk solvent $k_{sol}$ (e/Å <sup>3</sup> ), $B_{sol}$ (Å <sup>2</sup> ) | 0.37 , 42.4                                                 | EDS              |
| L-test for twinning <sup>2</sup>                                        | $\langle  L  \rangle = 0.50$ , $\langle L^2 \rangle = 0.34$ | Xtrriage         |
| Estimated twinning fraction                                             | 0.109 for h,h-k,h-l                                         | Xtrriage         |
| $F_o, F_c$ correlation                                                  | 0.94                                                        | EDS              |
| Total number of atoms                                                   | 7470                                                        | wwPDB-VP         |
| Average B, all atoms (Å <sup>2</sup> )                                  | 44.0                                                        | wwPDB-VP         |

Xtrriage's analysis on translational NCS is as follows: *The largest off-origin peak in the Patterson function is 7.16% of the height of the origin peak. No significant pseudotranslation is detected.*

<sup>1</sup>Intensities estimated from amplitudes.

<sup>2</sup>Theoretical values of  $\langle |L| \rangle$ ,  $\langle L^2 \rangle$  for acentric reflections are 0.5, 0.333 respectively for untwinned datasets, and 0.375, 0.2 for perfectly twinned datasets.

## 5 Model quality [i](#)

### 5.1 Standard geometry [i](#)

Bond lengths and bond angles in the following residue types are not validated in this section: LIG, YCM, CL

The Z score for a bond length (or angle) is the number of standard deviations the observed value is removed from the expected value. A bond length (or angle) with  $|Z| > 5$  is considered an outlier worth inspection. RMSZ is the root-mean-square of all Z scores of the bond lengths (or angles).

| Mol | Chain | Bond lengths |         | Bond angles |         |
|-----|-------|--------------|---------|-------------|---------|
|     |       | RMSZ         | # Z  >5 | RMSZ        | # Z  >5 |
| 1   | A     | 0.71         | 0/1854  | 0.75        | 0/2502  |
| 1   | B     | 0.72         | 0/1770  | 0.77        | 0/2385  |
| 1   | C     | 0.71         | 0/1846  | 0.76        | 0/2490  |
| 1   | D     | 0.75         | 0/1652  | 0.76        | 0/2227  |
| All | All   | 0.72         | 0/7122  | 0.76        | 0/9604  |

There are no bond length outliers.

There are no bond angle outliers.

There are no chirality outliers.

There are no planarity outliers.

### 5.2 Too-close contacts [i](#)

In the following table, the Non-H and H(model) columns list the number of non-hydrogen atoms and hydrogen atoms in the chain respectively. The H(added) column lists the number of hydrogen atoms added and optimized by MolProbity. The Clashes column lists the number of clashes within the asymmetric unit, whereas Symm-Clashes lists symmetry related clashes.

| Mol | Chain | Non-H | H(model) | H(added) | Clashes | Symm-Clashes |
|-----|-------|-------|----------|----------|---------|--------------|
| 1   | A     | 1843  | 0        | 1833     | 19      | 0            |
| 1   | B     | 1758  | 0        | 1780     | 17      | 0            |
| 1   | C     | 1834  | 0        | 1831     | 29      | 0            |
| 1   | D     | 1639  | 0        | 1657     | 18      | 0            |
| 2   | E     | 175   | 0        | 8        | 3       | 0            |
| 3   | F     | 2     | 0        | 0        | 0       | 0            |
| 4   | S     | 219   | 0        | 0        | 5       | 0            |
| All | All   | 7470  | 0        | 7109     | 74      | 0            |

The all-atom clashscore is defined as the number of clashes found per 1000 atoms (including

hydrogen atoms). The all-atom clashscore for this structure is 5.

All (74) close contacts within the same asymmetric unit are listed below, sorted by their clash magnitude.

| Atom-1             | Atom-2             | Interatomic distance (Å) | Clash overlap (Å) |
|--------------------|--------------------|--------------------------|-------------------|
| 1:C:539:LEU:HD12   | 1:C:539:LEU:H      | 1.23                     | 1.04              |
| 1:D:374:ASP:OD2    | 1:D:471:GLU:OE1    | 1.78                     | 1.01              |
| 1:A:501[A]:HIS:NE2 | 1:B:501:HIS:HE1    | 1.65                     | 0.94              |
| 1:C:539:LEU:CD1    | 1:C:539:LEU:H      | 1.93                     | 0.82              |
| 1:A:501[A]:HIS:CD2 | 1:B:501:HIS:CE1    | 2.69                     | 0.80              |
| 1:A:488:HIS:ND1    | 4:S:139:HOH:O      | 2.15                     | 0.80              |
| 1:A:501[A]:HIS:CD2 | 1:B:501:HIS:HE1    | 2.03                     | 0.76              |
| 1:C:333:PRO:HD2    | 4:S:227:HOH:O      | 1.91                     | 0.71              |
| 1:A:497:LEU:O      | 1:A:501[A]:HIS:CD2 | 2.43                     | 0.70              |
| 1:D:421:MET:SD     | 2:E:4:LIG:O05      | 2.49                     | 0.70              |
| 1:A:354:LEU:O      | 1:A:358:ILE:HD13   | 1.91                     | 0.70              |
| 1:B:412:ARG:HH11   | 1:B:412:ARG:HG3    | 1.60                     | 0.67              |
| 1:B:412:ARG:NH1    | 1:B:412:ARG:HG3    | 2.08                     | 0.67              |
| 1:A:396:MET:O      | 1:A:436:ARG:HD3    | 1.95                     | 0.66              |
| 1:A:501[A]:HIS:NE2 | 1:B:501:HIS:CE1    | 2.56                     | 0.65              |
| 1:C:539:LEU:HD12   | 1:C:539:LEU:N      | 2.05                     | 0.64              |
| 1:B:412:ARG:CG     | 1:B:412:ARG:HH11   | 2.12                     | 0.63              |
| 1:B:376:VAL:CG2    | 1:B:544:LEU:HD23   | 2.30                     | 0.61              |
| 1:C:418:VAL:O      | 1:C:421:MET:HB3    | 2.02                     | 0.58              |
| 1:A:541:LEU:HD21   | 1:C:373:HIS:CG     | 2.40                     | 0.57              |
| 1:D:376:VAL:HG13   | 1:D:540:LEU:HB2    | 1.87                     | 0.57              |
| 1:D:356:HIS:HD2    | 4:S:198:HOH:O      | 1.88                     | 0.56              |
| 1:D:421:MET:SD     | 2:E:4:LIG:C19      | 2.96                     | 0.54              |
| 1:C:416:LYS:HG2    | 1:C:422:VAL:HG21   | 1.90                     | 0.53              |
| 1:B:376:VAL:HG22   | 1:B:544:LEU:HD23   | 1.92                     | 0.52              |
| 1:A:525:LEU:HD13   | 1:A:525:LEU:C      | 2.30                     | 0.52              |
| 1:C:525:LEU:C      | 1:C:525:LEU:HD13   | 2.29                     | 0.52              |
| 1:C:370:LEU:HD11   | 1:C:475:ILE:HD11   | 1.92                     | 0.51              |
| 1:A:520:LYS:NZ     | 4:S:134:HOH:O      | 2.43                     | 0.50              |
| 1:B:376:VAL:HG23   | 1:B:544:LEU:HD23   | 1.93                     | 0.50              |
| 1:D:423:GLU:CD     | 1:D:524:HIS:HE1    | 2.14                     | 0.50              |
| 1:C:537:TYR:CD1    | 1:C:537:TYR:C      | 2.85                     | 0.50              |
| 1:D:375:GLN:HB3    | 1:D:544:LEU:HD11   | 1.94                     | 0.50              |
| 1:A:374:ASP:OD2    | 1:A:471:GLU:OE1    | 2.30                     | 0.50              |
| 1:A:541:LEU:CD2    | 1:C:373:HIS:ND1    | 2.76                     | 0.49              |
| 1:C:374:ASP:OD2    | 1:C:471:GLU:OE2    | 2.31                     | 0.49              |
| 1:A:541:LEU:HD23   | 1:C:373:HIS:CE1    | 2.49                     | 0.48              |
| 1:B:374:ASP:OD2    | 1:B:471:GLU:OE1    | 2.32                     | 0.47              |

Continued on next page...

Continued from previous page...

| Atom-1             | Atom-2             | Interatomic distance (Å) | Clash overlap (Å) |
|--------------------|--------------------|--------------------------|-------------------|
| 1:C:416:LYS:C      | 1:C:418:VAL:H      | 2.17                     | 0.47              |
| 1:C:350:ALA:O      | 1:C:354:LEU:HD23   | 2.16                     | 0.46              |
| 1:C:539:LEU:CD1    | 1:C:539:LEU:N      | 2.71                     | 0.46              |
| 1:D:538:ASP:O      | 1:D:542:GLU:CB     | 2.63                     | 0.46              |
| 1:B:515[B]:ARG:HD3 | 1:B:515[B]:ARG:HA  | 1.74                     | 0.45              |
| 1:A:501[A]:HIS:CD2 | 1:A:501[A]:HIS:N   | 2.85                     | 0.45              |
| 1:C:358:ILE:CD1    | 1:C:379:LEU:HD13   | 2.46                     | 0.45              |
| 1:D:427:MET:CE     | 1:D:516:HIS:CD2    | 3.00                     | 0.45              |
| 1:B:424:ILE:HD13   | 1:B:427:MET:CE     | 2.48                     | 0.44              |
| 1:D:356:HIS:HE1    | 4:S:10:HOH:O       | 1.99                     | 0.44              |
| 1:C:537:TYR:CD1    | 1:C:537:TYR:O      | 2.70                     | 0.44              |
| 1:C:537:TYR:O      | 1:C:537:TYR:CG     | 2.71                     | 0.44              |
| 1:D:423:GLU:OE2    | 1:D:520:LYS:HE3    | 2.17                     | 0.44              |
| 1:B:376:VAL:HG13   | 1:B:540:LEU:HB2    | 1.99                     | 0.43              |
| 1:D:427:MET:HE3    | 1:D:516:HIS:CD2    | 2.53                     | 0.43              |
| 1:C:416:LYS:C      | 1:C:418:VAL:N      | 2.70                     | 0.43              |
| 1:B:539:LEU:CD1    | 1:B:543:MET:SD     | 3.07                     | 0.43              |
| 1:D:535:PRO:HB3    | 1:D:539:LEU:HD23   | 2.01                     | 0.43              |
| 1:D:427:MET:CE     | 1:D:516:HIS:HD2    | 2.32                     | 0.43              |
| 1:D:423:GLU:HG3    | 1:D:424:ILE:N      | 2.34                     | 0.43              |
| 1:B:316:VAL:HG21   | 1:B:489:LEU:HD21   | 2.01                     | 0.42              |
| 1:C:416:LYS:HA     | 1:C:422:VAL:CG2    | 2.50                     | 0.42              |
| 1:C:362:LYS:HG3    | 1:C:547:HIS:CE1    | 2.55                     | 0.41              |
| 1:D:539:LEU:HD12   | 1:D:539:LEU:O      | 2.20                     | 0.41              |
| 1:C:424:ILE:HD13   | 1:C:521:GLY:HA2    | 2.02                     | 0.41              |
| 1:C:342:MET:HE1    | 1:C:417:YCM:HB3    | 2.02                     | 0.41              |
| 1:A:513:HIS:HB2    | 1:B:459:TYR:CD2    | 2.55                     | 0.41              |
| 1:C:350:ALA:O      | 1:C:354:LEU:CD2    | 2.69                     | 0.41              |
| 1:C:475:ILE:HD13   | 1:C:475:ILE:HA     | 1.92                     | 0.41              |
| 1:C:523:GLU:OE1    | 1:C:523:GLU:HA     | 2.20                     | 0.41              |
| 1:D:476:HIS:CD2    | 1:D:476:HIS:C      | 2.94                     | 0.41              |
| 1:A:353:GLU:OE1    | 2:E:1:LIG:O03      | 2.39                     | 0.40              |
| 1:A:541:LEU:HD21   | 1:C:373:HIS:ND1    | 2.36                     | 0.40              |
| 1:D:498:GLN:HA     | 1:D:501:HIS:CE1    | 2.56                     | 0.40              |
| 1:A:498:GLN:HA     | 1:A:501[B]:HIS:CE1 | 2.57                     | 0.40              |
| 1:C:418:VAL:O      | 1:C:421:MET:CB     | 2.68                     | 0.40              |

There are no symmetry-related clashes.

### 5.3 Torsion angles [i](#)

#### 5.3.1 Protein backbone [i](#)

In the following table, the Percentiles column shows the percent Ramachandran outliers of the chain as a percentile score with respect to all X-ray entries followed by that with respect to entries of similar resolution.

The Analysed column shows the number of residues for which the backbone conformation was analysed, and the total number of residues.

| Mol | Chain | Analysed       | Favoured   | Allowed | Outliers | Percentiles |     |
|-----|-------|----------------|------------|---------|----------|-------------|-----|
| 1   | A     | 225/257 (88%)  | 223 (99%)  | 2 (1%)  | 0        | 100         | 100 |
| 1   | B     | 211/257 (82%)  | 209 (99%)  | 1 (0%)  | 1 (0%)   | 29          | 17  |
| 1   | C     | 221/257 (86%)  | 218 (99%)  | 2 (1%)  | 1 (0%)   | 29          | 17  |
| 1   | D     | 196/257 (76%)  | 195 (100%) | 1 (0%)  | 0        | 100         | 100 |
| All | All   | 853/1028 (83%) | 845 (99%)  | 6 (1%)  | 2 (0%)   | 47          | 37  |

All (2) Ramachandran outliers are listed below:

| Mol | Chain | Res | Type |
|-----|-------|-----|------|
| 1   | B     | 416 | LYS  |
| 1   | C     | 418 | VAL  |

#### 5.3.2 Protein sidechains [i](#)

In the following table, the Percentiles column shows the percent sidechain outliers of the chain as a percentile score with respect to all X-ray entries followed by that with respect to entries of similar resolution.

The Analysed column shows the number of residues for which the sidechain conformation was analysed, and the total number of residues.

| Mol | Chain | Analysed      | Rotameric | Outliers | Percentiles |    |
|-----|-------|---------------|-----------|----------|-------------|----|
| 1   | A     | 196/232 (84%) | 191 (97%) | 5 (3%)   | 46          | 36 |
| 1   | B     | 191/232 (82%) | 187 (98%) | 4 (2%)   | 53          | 45 |
| 1   | C     | 195/232 (84%) | 193 (99%) | 2 (1%)   | 76          | 73 |
| 1   | D     | 178/232 (77%) | 175 (98%) | 3 (2%)   | 60          | 54 |
| All | All   | 760/928 (82%) | 746 (98%) | 14 (2%)  | 60          | 52 |

All (14) residues with a non-rotameric sidechain are listed below:

| Mol | Chain | Res    | Type |
|-----|-------|--------|------|
| 1   | A     | 469    | LEU  |
| 1   | A     | 473    | ASP  |
| 1   | A     | 492    | LYS  |
| 1   | A     | 501[A] | HIS  |
| 1   | A     | 501[B] | HIS  |
| 1   | B     | 412    | ARG  |
| 1   | B     | 492    | LYS  |
| 1   | B     | 539    | LEU  |
| 1   | B     | 544    | LEU  |
| 1   | C     | 473    | ASP  |
| 1   | C     | 539    | LEU  |
| 1   | D     | 423    | GLU  |
| 1   | D     | 437    | MET  |
| 1   | D     | 501    | HIS  |

Some sidechains can be flipped to improve hydrogen bonding and reduce clashes. All (14) such sidechains are listed below:

| Mol | Chain | Res | Type |
|-----|-------|-----|------|
| 1   | B     | 398 | HIS  |
| 1   | B     | 439 | ASN  |
| 1   | B     | 488 | HIS  |
| 1   | B     | 501 | HIS  |
| 1   | C     | 398 | HIS  |
| 1   | C     | 519 | ASN  |
| 1   | C     | 547 | HIS  |
| 1   | D     | 356 | HIS  |
| 1   | D     | 398 | HIS  |
| 1   | D     | 476 | HIS  |
| 1   | D     | 513 | HIS  |
| 1   | D     | 516 | HIS  |
| 1   | D     | 519 | ASN  |
| 1   | D     | 524 | HIS  |

### 5.3.3 RNA [i](#)

There are no RNA molecules in this entry.

### 5.4 Non-standard residues in protein, DNA, RNA chains [i](#)

There are no non-standard protein/DNA/RNA residues in this entry.

## 5.5 Carbohydrates [i](#)

There are no monosaccharides in this entry.

## 5.6 Ligand geometry [i](#)

Of 6 ligands modelled in this entry, 4 could not be matched to an existing wwPDB Chemical Component Dictionary definition at this stage and 2 are monoatomic - leaving 0 for Mogul analysis.

There are no bond length outliers.

There are no bond angle outliers.

There are no chirality outliers.

There are no torsion outliers.

There are no ring outliers.

No monomer is involved in short contacts.

The following is a two-dimensional graphical depiction of Mogul quality analysis of bond lengths, bond angles, torsion angles, and ring geometry for all instances of the Ligand of Interest. In addition, ligands with molecular weight > 250 and outliers as shown on the validation Tables will also be included. For torsion angles, if less than 5% of the Mogul distribution of torsion angles is within 10 degrees of the torsion angle in question, then that torsion angle is considered an outlier. Any bond that is central to one or more torsion angles identified as an outlier by Mogul will be highlighted in the graph. For rings, the root-mean-square deviation (RMSD) between the ring in question and similar rings identified by Mogul is calculated over all ring torsion angles. If the average RMSD is greater than 60 degrees and the minimal RMSD between the ring in question and any Mogul-identified rings is also greater than 60 degrees, then that ring is considered an outlier. The outliers are highlighted in purple. The color gray indicates Mogul did not find sufficient equivalents in the CSD to analyse the geometry.

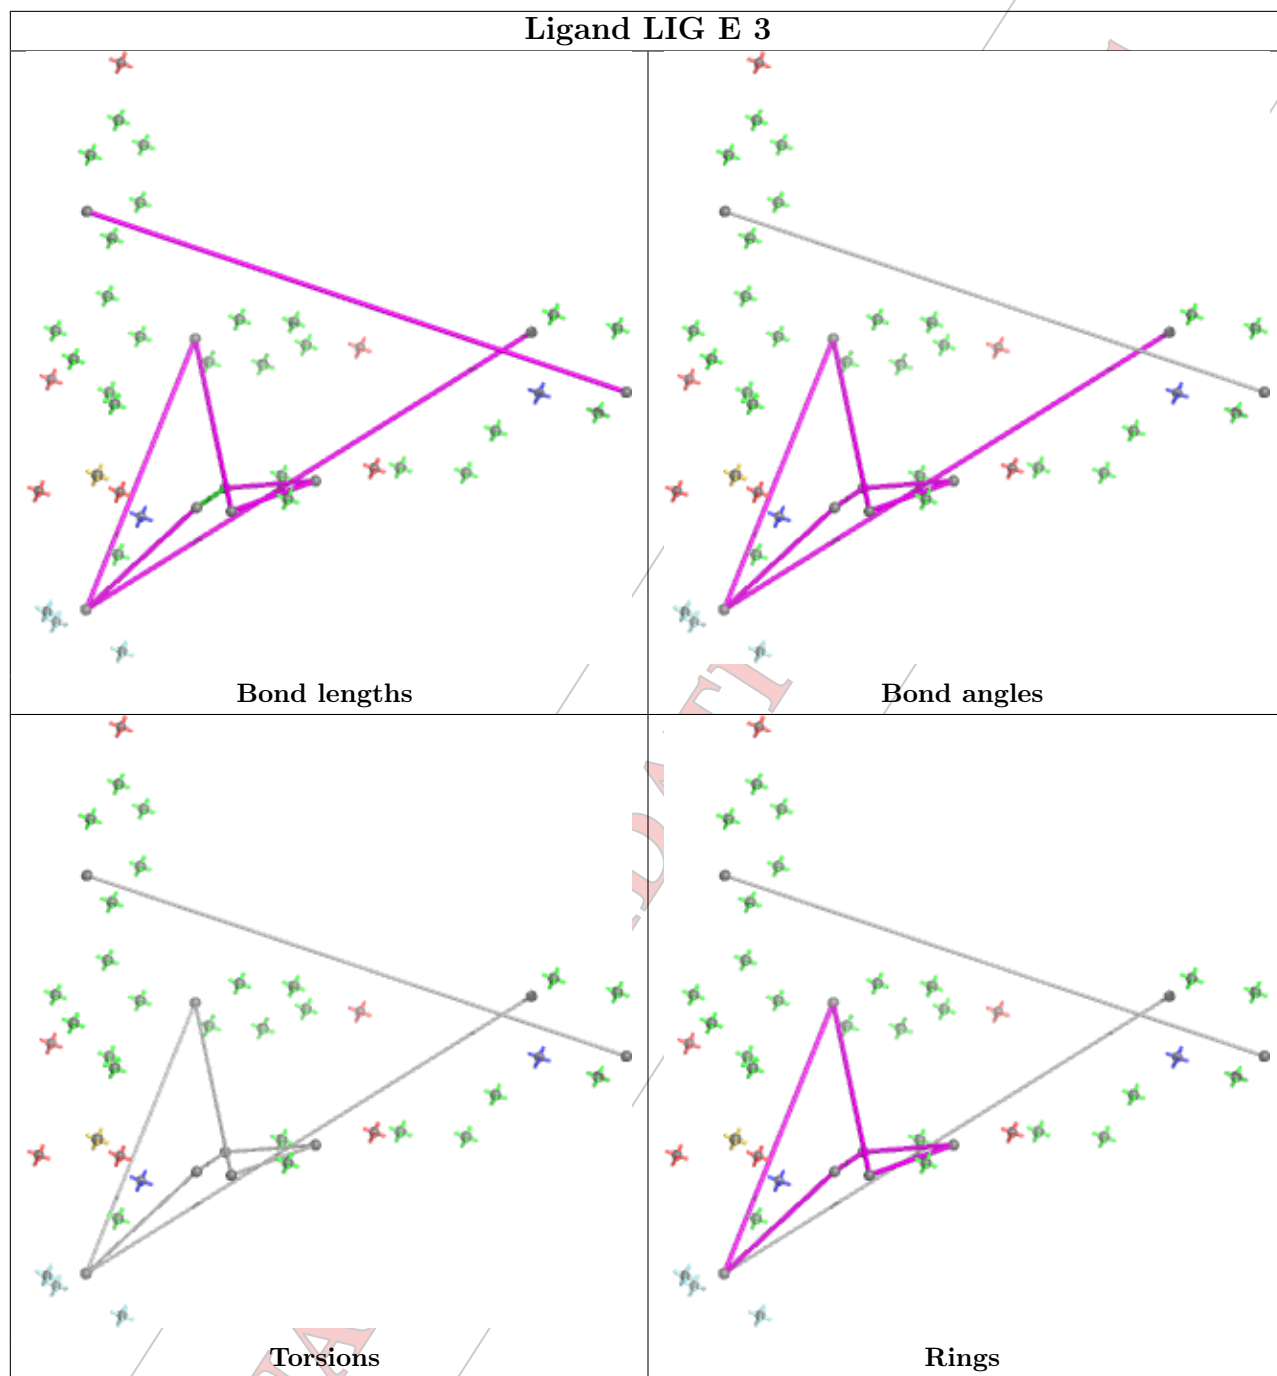

PRELIMINARY



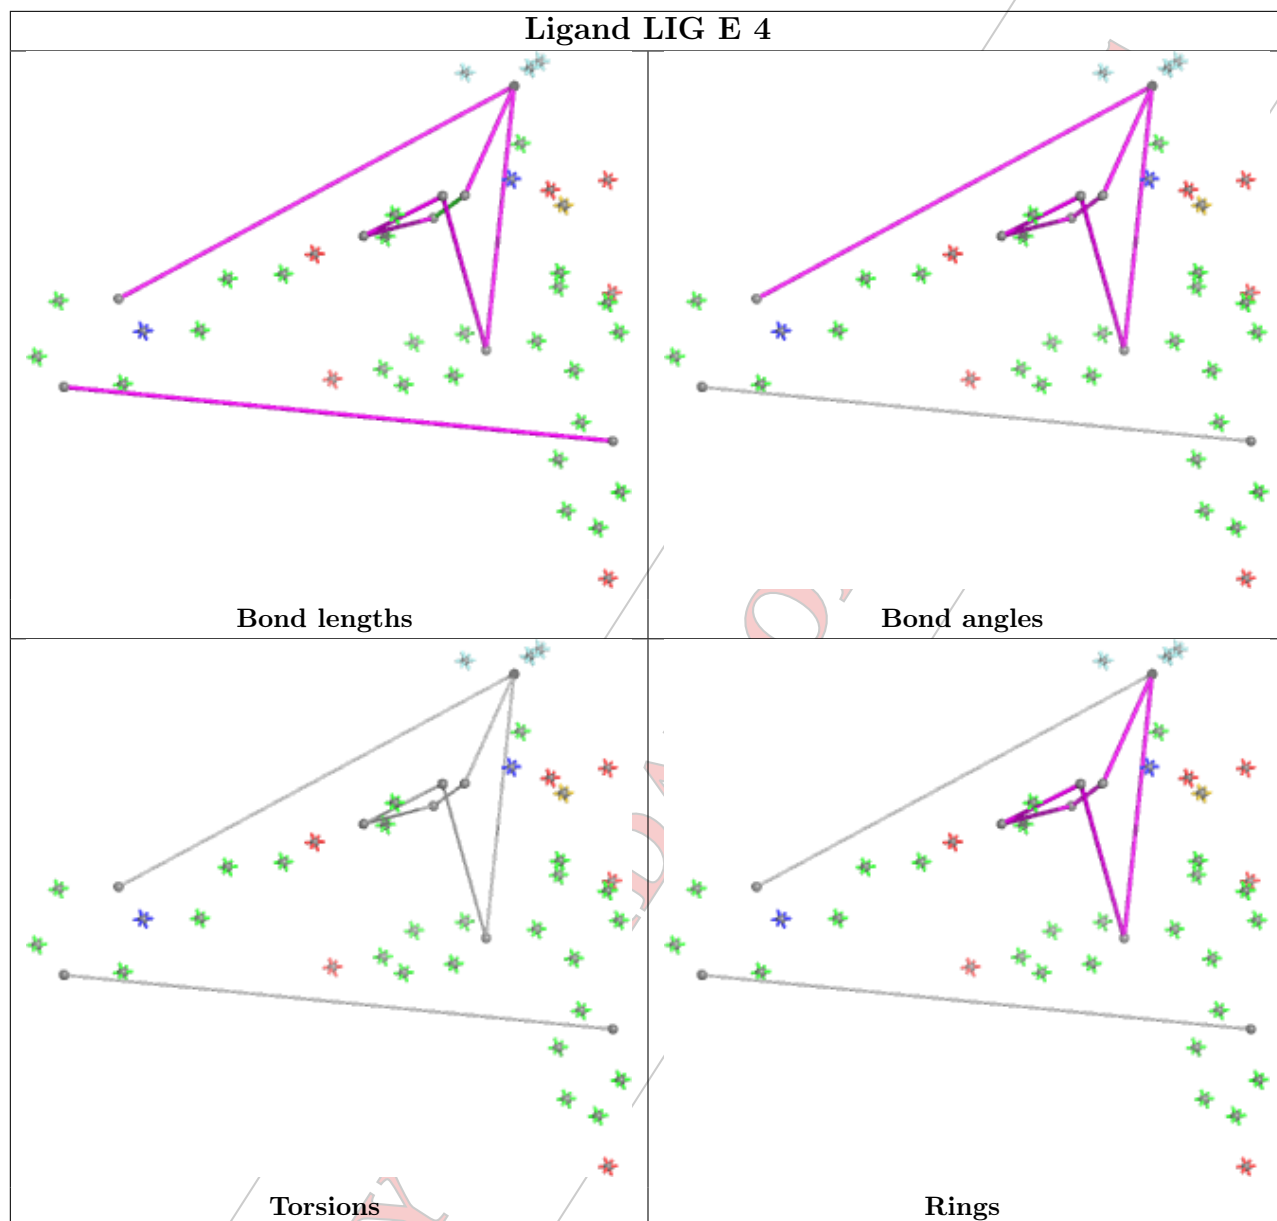

PRELIMINARY

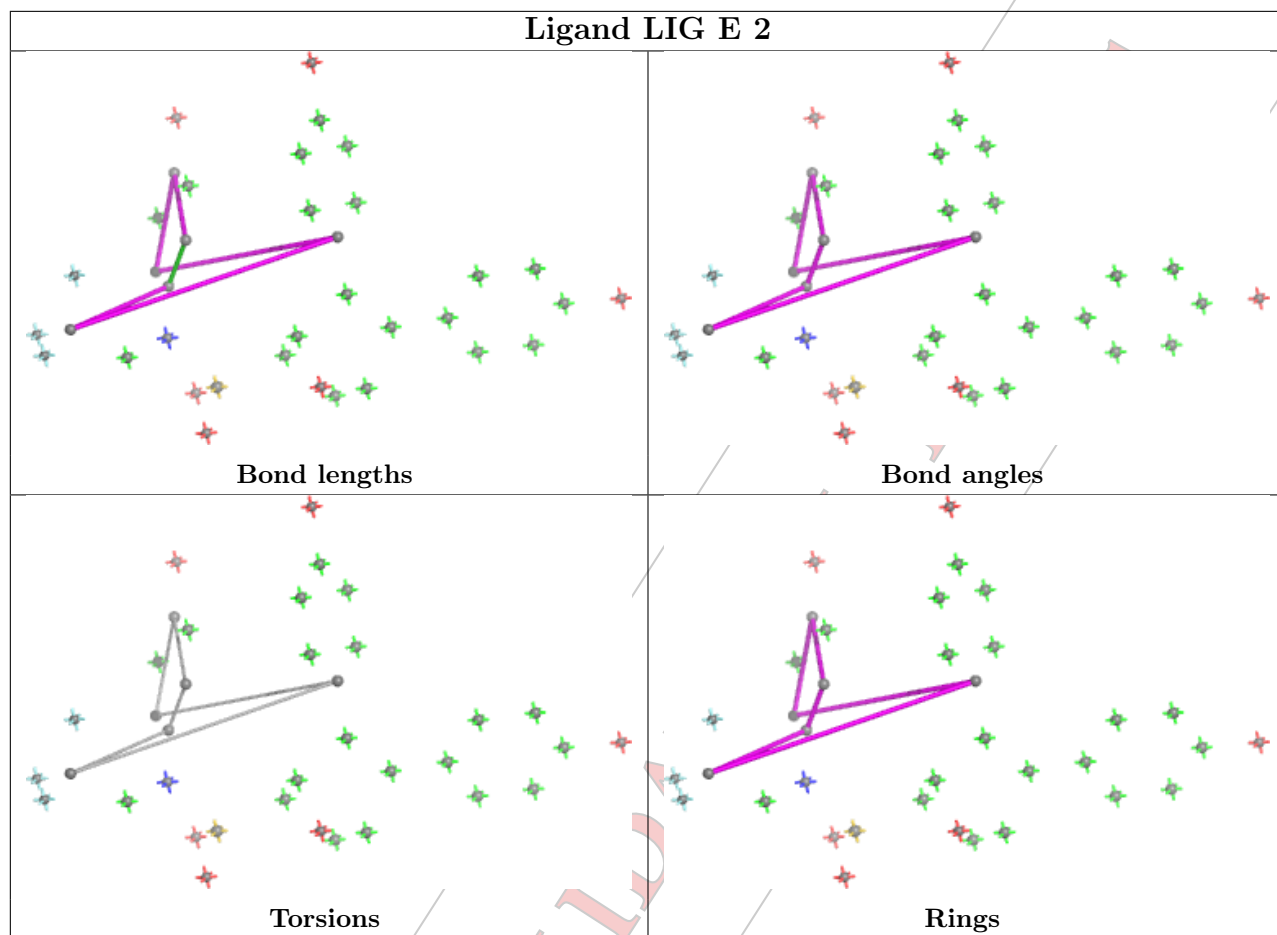

PRELIMINARY VALIDATION

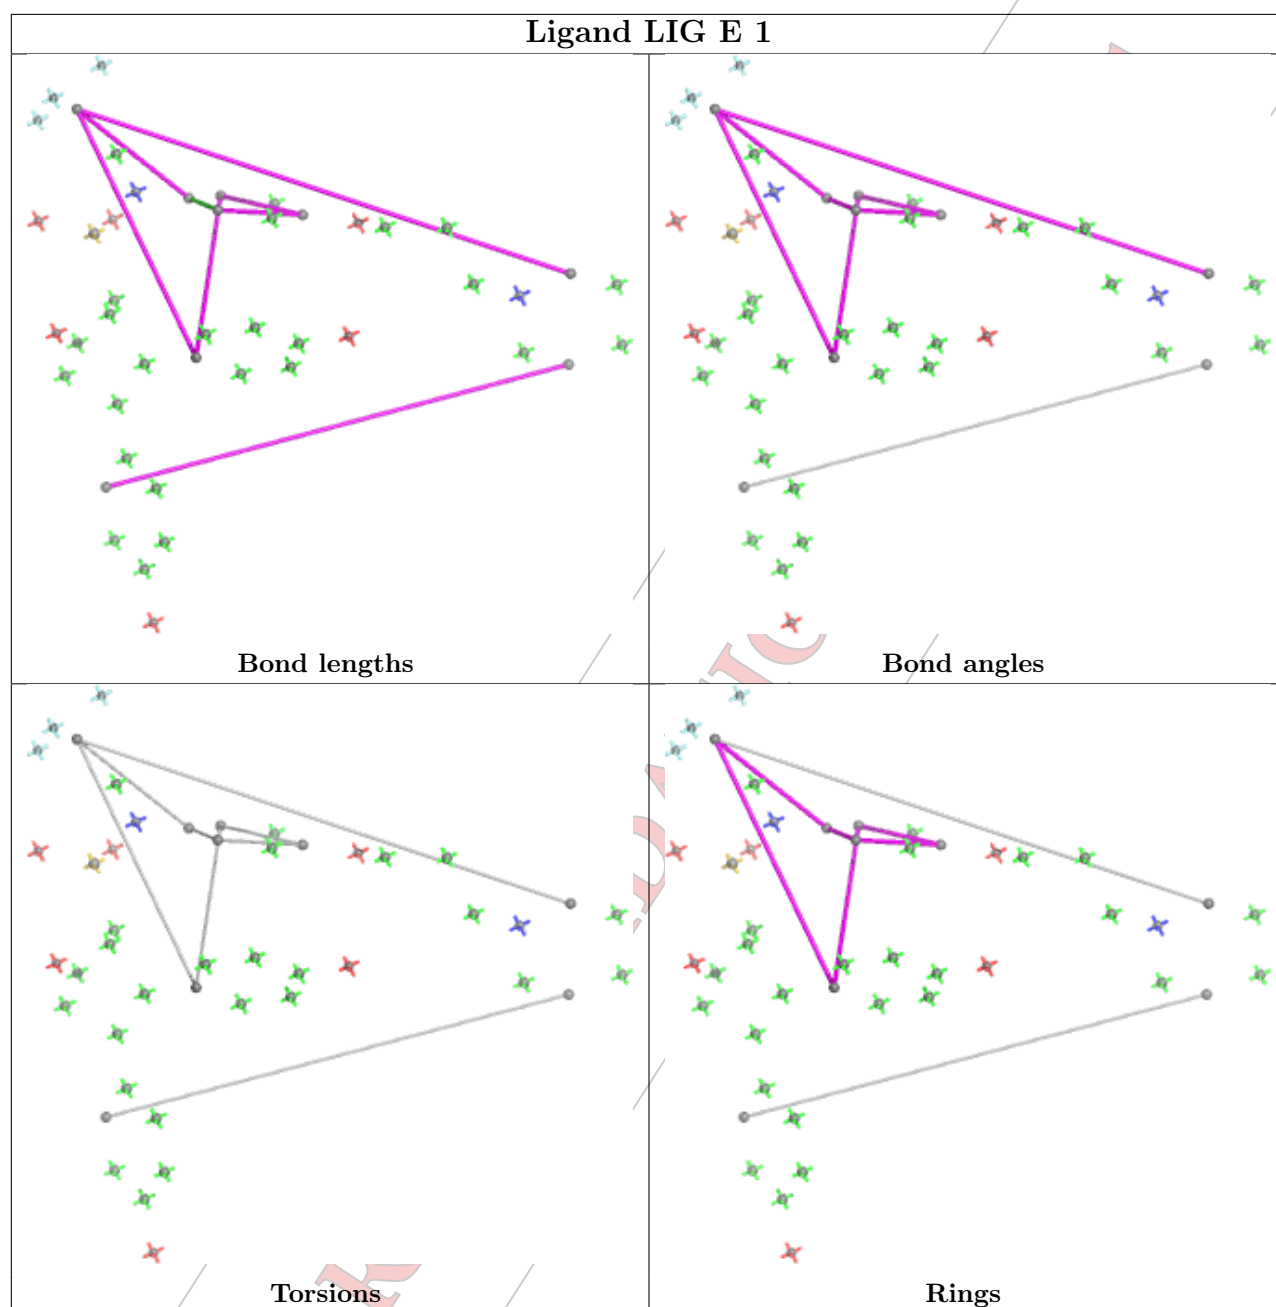

## 5.7 Other polymers [\(i\)](#)

There are no such residues in this entry.

## 5.8 Polymer linkage issues [\(i\)](#)

The following chains have linkage breaks:

| Mol | Chain | Number of breaks |
|-----|-------|------------------|
| 1   | D     | 1                |

All chain breaks are listed below:

| Model | Chain | Residue-1 | Atom-1 | Residue-2 | Atom-2 | Distance (Å) |
|-------|-------|-----------|--------|-----------|--------|--------------|
| 1     | D     | 540:LEU   | C      | 542:GLU   | N      | 3.32         |

PRELIMINARY VALIDATION REPORT

## 6 Fit of model and data [i](#)

### 6.1 Protein, DNA and RNA chains [i](#)

In the following table, the column labelled '#RSRZ > 2' contains the number (and percentage) of RSRZ outliers, followed by percent RSRZ outliers for the chain as percentile scores relative to all X-ray entries and entries of similar resolution. The OWAB column contains the minimum, median, 95<sup>th</sup> percentile and maximum values of the occupancy-weighted average B-factor per residue. The column labelled 'Q < 0.9' lists the number of (and percentage) of residues with an average occupancy less than 0.9.

| Mol | Chain | Analysed       | <RSRZ> | #RSRZ>2       | OWAB(Å <sup>2</sup> ) | Q<0.9 |
|-----|-------|----------------|--------|---------------|-----------------------|-------|
| 1   | A     | 231/257 (89%)  | 0.13   | 4 (1%) 70 72  | 24, 44, 75, 110       | 0     |
| 1   | B     | 219/257 (85%)  | 0.08   | 8 (3%) 41 43  | 23, 40, 78, 97        | 0     |
| 1   | C     | 225/257 (87%)  | 0.04   | 4 (1%) 68 70  | 23, 39, 70, 97        | 0     |
| 1   | D     | 208/257 (80%)  | 0.10   | 10 (4%) 30 32 | 24, 39, 75, 94        | 0     |
| All | All   | 883/1028 (85%) | 0.09   | 26 (2%) 51 53 | 23, 41, 75, 110       | 0     |

All (26) RSRZ outliers are listed below:

| Mol | Chain | Res | Type | RSRZ |
|-----|-------|-----|------|------|
| 1   | D     | 544 | LEU  | 6.2  |
| 1   | B     | 536 | SER  | 3.7  |
| 1   | B     | 535 | PRO  | 3.4  |
| 1   | D     | 536 | SER  | 3.0  |
| 1   | D     | 460 | THR  | 3.0  |
| 1   | D     | 535 | PRO  | 2.9  |
| 1   | C     | 331 | TYR  | 2.8  |
| 1   | B     | 534 | VAL  | 2.7  |
| 1   | A     | 526 | TYR  | 2.6  |
| 1   | C     | 465 | THR  | 2.5  |
| 1   | C     | 537 | TYR  | 2.5  |
| 1   | D     | 537 | TYR  | 2.5  |
| 1   | D     | 420 | GLY  | 2.5  |
| 1   | A     | 331 | TYR  | 2.4  |
| 1   | A     | 468 | SER  | 2.4  |
| 1   | A     | 334 | THR  | 2.4  |
| 1   | B     | 541 | LEU  | 2.3  |
| 1   | D     | 425 | PHE  | 2.2  |
| 1   | B     | 463 | SER  | 2.2  |
| 1   | B     | 526 | TYR  | 2.2  |
| 1   | B     | 462 | LEU  | 2.2  |

*Continued on next page...*

Continued from previous page...

| Mol | Chain | Res | Type | RSRZ |
|-----|-------|-----|------|------|
| 1   | D     | 538 | ASP  | 2.2  |
| 1   | B     | 543 | MET  | 2.1  |
| 1   | C     | 437 | MET  | 2.0  |
| 1   | D     | 526 | TYR  | 2.0  |
| 1   | D     | 543 | MET  | 2.0  |

## 6.2 Non-standard residues in protein, DNA, RNA chains [i](#)

There are no non-standard protein/DNA/RNA residues in this entry.

## 6.3 Carbohydrates [i](#)

There are no monosaccharides in this entry.

## 6.4 Ligands [i](#)

In the following table, the Atoms column lists the number of modelled atoms in the group and the number defined in the chemical component dictionary. The B-factors column lists the minimum, median, 95<sup>th</sup> percentile and maximum values of B factors of atoms in the group. The column labelled 'Q< 0.9' lists the number of atoms with occupancy less than 0.9.

| Mol | Type | Chain | Res | Atoms | RSCC | RSR  | B-factors(Å <sup>2</sup> ) | Q<0.9 |
|-----|------|-------|-----|-------|------|------|----------------------------|-------|
| 2   | LIG  | E     | 1   | 46/?  | 0.91 | 0.13 | 23,46,84,92                | 0     |
| 2   | LIG  | E     | 2   | 37/?  | 0.92 | 0.13 | 30,39,77,85                | 0     |
| 2   | LIG  | E     | 3   | 46/?  | 0.93 | 0.15 | 24,49,81,88                | 0     |
| 2   | LIG  | E     | 4   | 46/?  | 0.94 | 0.15 | 27,50,91,101               | 0     |
| 3   | CL   | F     | 2   | 1/?   | 0.98 | 0.09 | 34,34,34,34                | 0     |
| 3   | CL   | F     | 1   | 1/?   | 0.99 | 0.10 | 34,34,34,34                | 0     |

The following is a graphical depiction of the model fit to experimental electron density of all instances of the Ligand of Interest. In addition, ligands with molecular weight > 250 and outliers as shown on the geometry validation Tables will also be included. Each fit is shown from different orientation to approximate a three-dimensional view.

**Electron density around LIG E 1:**

$2mF_o-DF_c$  (at 0.7 rmsd) in gray  
 $mF_o-DF_c$  (at 3 rmsd) in purple (negative)  
and green (positive)

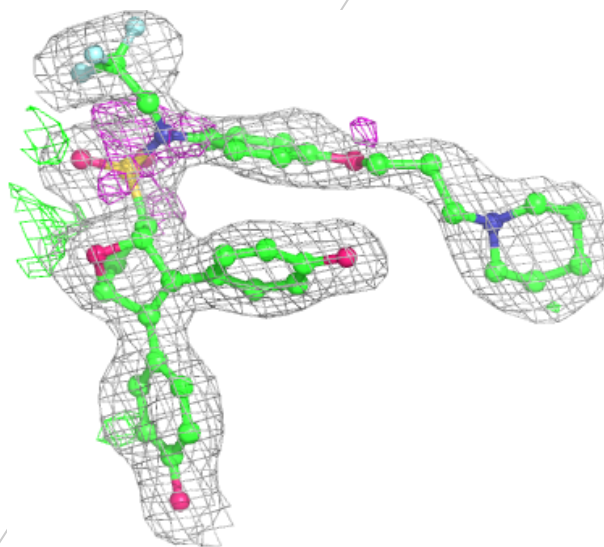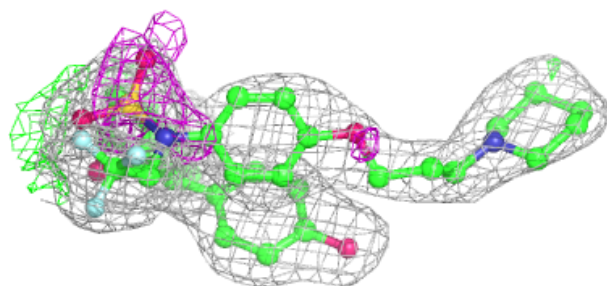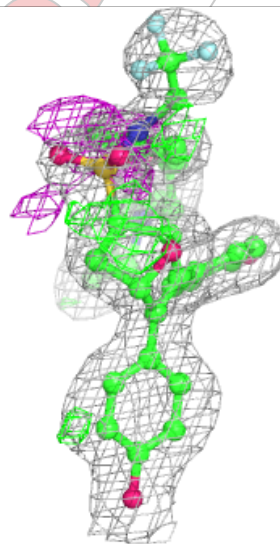

PRELIMINARY

**Electron density around LIG E 2:**

$2mF_o-DF_c$  (at 0.7 rmsd) in gray  
 $mF_o-DF_c$  (at 3 rmsd) in purple (negative)  
and green (positive)

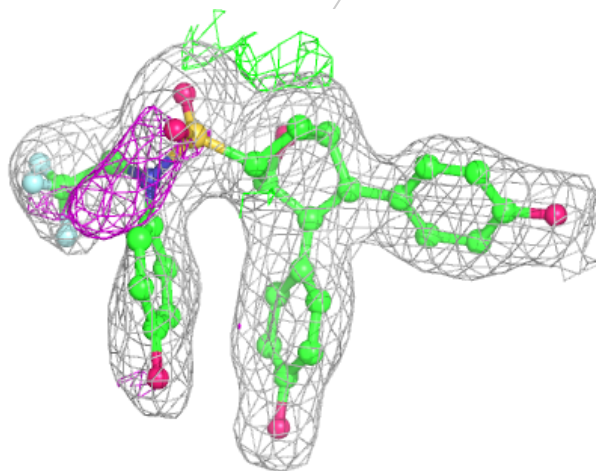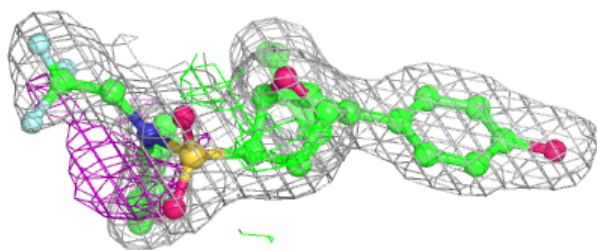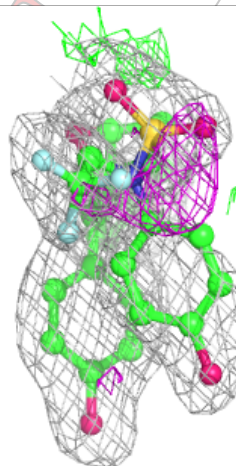

PRELIMINARY VALIDATION



**Electron density around LIG E 3:**

$2mF_o-DF_c$  (at 0.7 rmsd) in gray  
 $mF_o-DF_c$  (at 3 rmsd) in purple (negative)  
and green (positive)

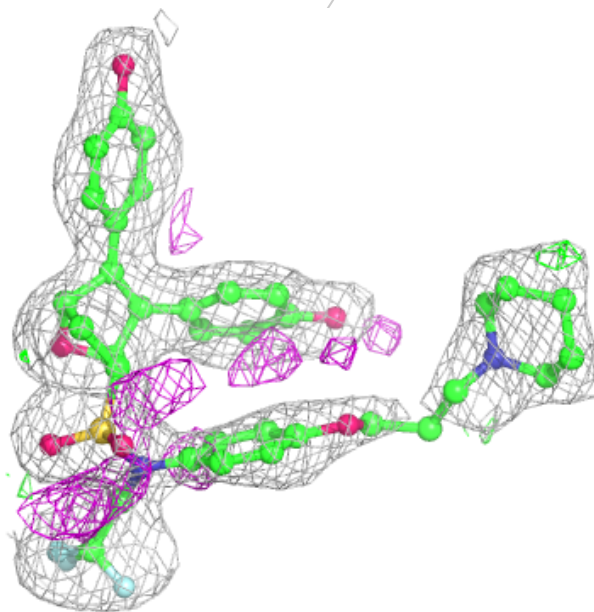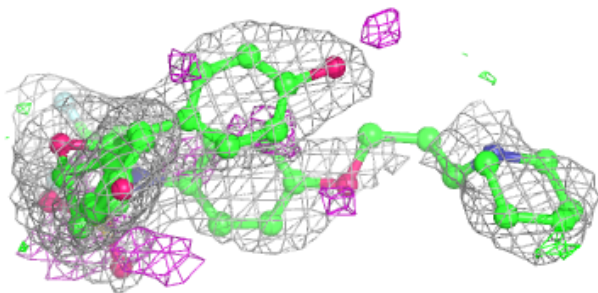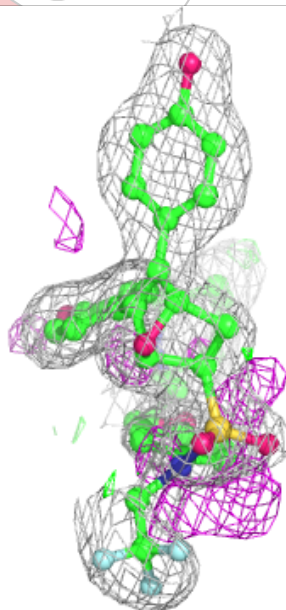

PRELIMINARY

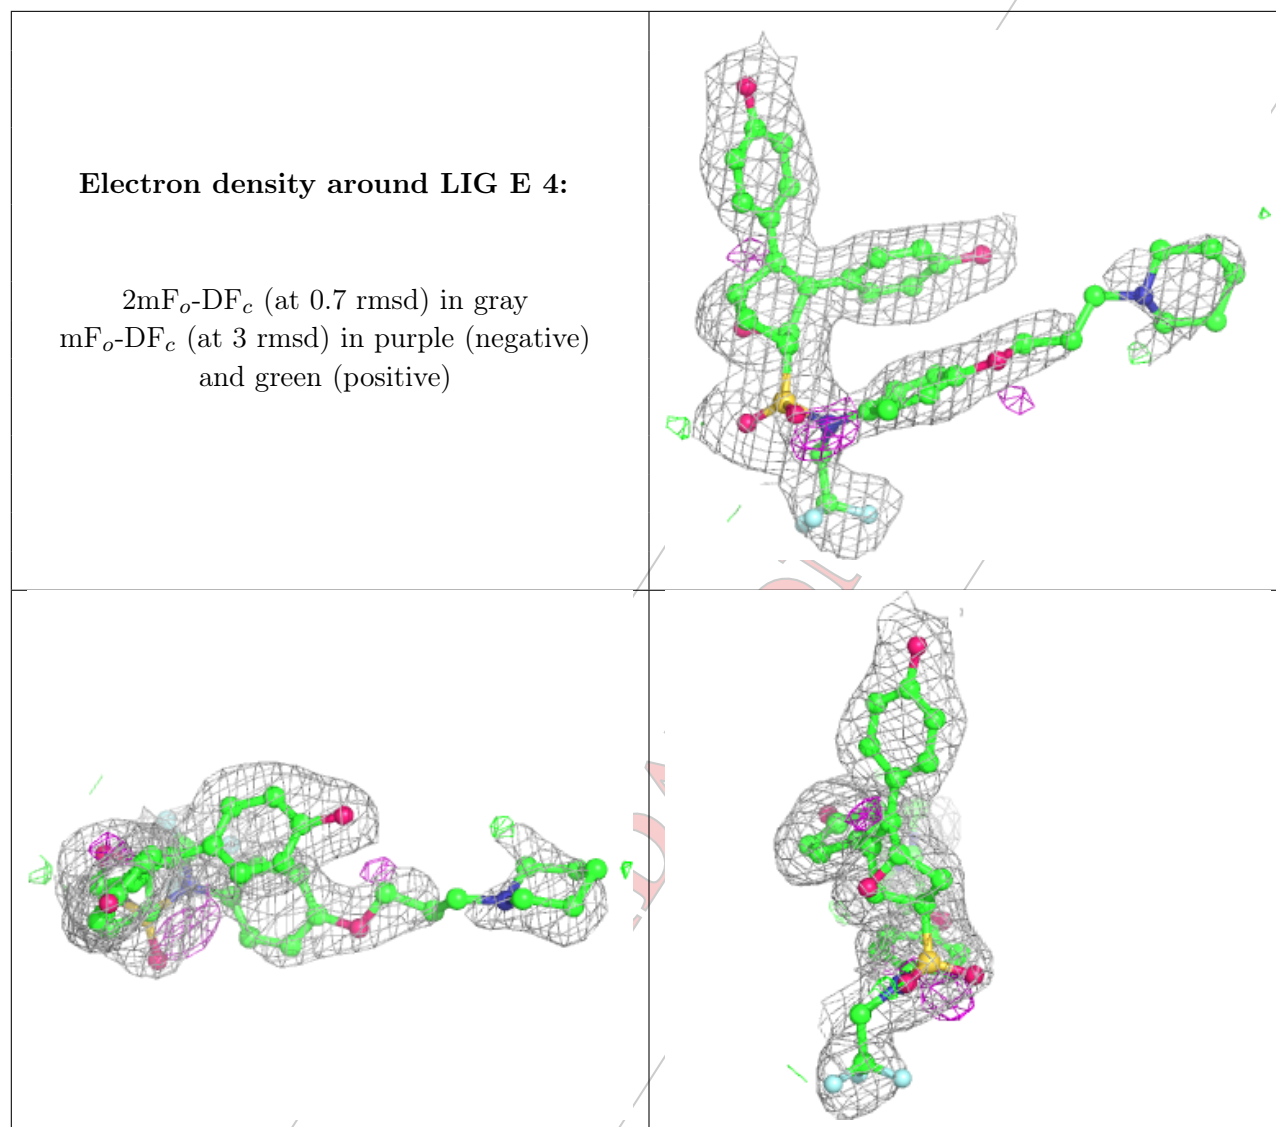

## 6.5 Other polymers [i](#)

There are no such residues in this entry.

PRELIMINARY



# Preliminary Full wwPDB X-ray Structure Validation Report ⓘ

Aug 9, 2020 – 07:25 PM EDT

Deposition ID : D\_1000251213

This is a Preliminary Full wwPDB X-ray Structure Validation Report.

This report is produced by the wwPDB Deposition System during initial deposition but before annotation of the structure.

We welcome your comments at [validation@mail.wwpdb.org](mailto:validation@mail.wwpdb.org)

A user guide is available at

<https://www.wwpdb.org/validation/2017/XrayValidationReportHelp>

with specific help available everywhere you see the ⓘ symbol.

---

The following versions of software and data (see [references ⓘ](#)) were used in the production of this report:

|                                |   |                                                                    |
|--------------------------------|---|--------------------------------------------------------------------|
| MolProbity                     | : | 4.02b-467                                                          |
| Mogul                          | : | 1.8.5 (274361), CSD as541be (2020)                                 |
| Xtriage (Phenix)               | : | 1.13                                                               |
| EDS                            | : | 2.13.1                                                             |
| buster-report                  | : | 1.1.7 (2018)                                                       |
| Percentile statistics          | : | 20191225.v01 (using entries in the PDB archive December 25th 2019) |
| Refmac                         | : | 5.8.0158                                                           |
| CCP4                           | : | 7.0.044 (Gargrove)                                                 |
| Ideal geometry (proteins)      | : | Engh & Huber (2001)                                                |
| Ideal geometry (DNA, RNA)      | : | Parkinson et al. (1996)                                            |
| Validation Pipeline (wwPDB-VP) | : | 2.13.1                                                             |

# 1 Overall quality at a glance i

The following experimental techniques were used to determine the structure:  
*X-RAY DIFFRACTION*

The reported resolution of this entry is 1.64 Å.

Percentile scores (ranging between 0-100) for global validation metrics of the entry are shown in the following graphic. The table shows the number of entries on which the scores are based.

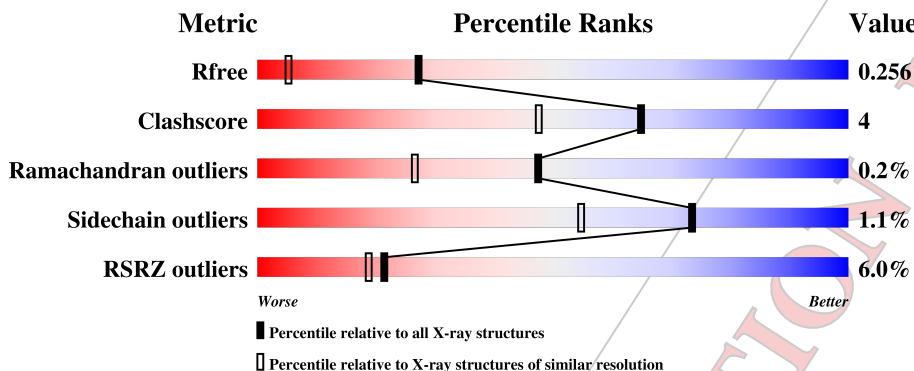

| Metric                | Whole archive<br>(#Entries) | Similar resolution<br>(#Entries, resolution range(Å)) |
|-----------------------|-----------------------------|-------------------------------------------------------|
| $R_{free}$            | 130704                      | 3122 (1.66-1.62)                                      |
| Clashscore            | 141614                      | 3268 (1.66-1.62)                                      |
| Ramachandran outliers | 138981                      | 3215 (1.66-1.62)                                      |
| Sidechain outliers    | 138945                      | 3215 (1.66-1.62)                                      |
| RSRZ outliers         | 127900                      | 3079 (1.66-1.62)                                      |

The table below summarises the geometric issues observed across the polymeric chains and their fit to the electron density. The red, orange, yellow and green segments on the lower bar indicate the fraction of residues that contain outliers for  $\geq 3$ , 2, 1 and 0 types of geometric quality criteria respectively. A grey segment represents the fraction of residues that are not modelled. The numeric value for each fraction is indicated below the corresponding segment, with a dot representing fractions  $\leq 5\%$ . The upper red bar (where present) indicates the fraction of residues that have poor fit to the electron density. The numeric value is given above the bar.

| Mol | Chain | Length | Quality of chain                                         |
|-----|-------|--------|----------------------------------------------------------|
| 1   | A     | 257    | <br>5% (upper red), 80% (green), 8% (yellow), 11% (grey) |
| 1   | B     | 257    | <br>7% (upper red), 81% (green), 7% (yellow), 12% (grey) |
| 1   | C     | 257    | <br>4% (upper red), 81% (green), 7% (yellow), 11% (grey) |
| 1   | D     | 257    | <br>5% (upper red), 75% (green), 9% (yellow), 16% (grey) |

## 2 Entry composition i

There are 3 unique types of molecules in this entry. The entry contains 8188 atoms, of which 0 are hydrogens and 0 are deuteriums.

In the tables below, the ZeroOcc column contains the number of atoms modelled with zero occupancy, the AltConf column contains the number of residues with at least one atom in alternate conformation and the Trace column contains the number of residues modelled with at most 2 atoms.

- Molecule 1 is a protein called Estrogen Receptor.

| Mol | Chain | Residues | Atoms         |           |          |          |         | ZeroOcc | AltConf | Trace |
|-----|-------|----------|---------------|-----------|----------|----------|---------|---------|---------|-------|
|     |       |          | Total         | C         | N        | O        | S       |         |         |       |
| 1   | A     | 228      | Total<br>1836 | C<br>1178 | N<br>310 | O<br>332 | S<br>16 | 0       | 1       | 0     |
| 1   | B     | 227      | Total<br>1831 | C<br>1172 | N<br>309 | O<br>334 | S<br>16 | 0       | 2       | 0     |
| 1   | C     | 229      | Total<br>1843 | C<br>1181 | N<br>310 | O<br>336 | S<br>16 | 0       | 1       | 0     |
| 1   | D     | 217      | Total<br>1739 | C<br>1118 | N<br>291 | O<br>313 | S<br>17 | 0       | 0       | 0     |

- Molecule 2 is a ligand with the chemical component id LIG but its atom names do not match the existing wwPDB Chemical Component Dictionary definition for LIG. Consequently no firm identification of ligand chemistry can be made. Once the structure is annotated then an identification and diagram will be given here.

| Mol | Chain | Residues | Atoms       |         |        |        |         | ZeroOcc | AltConf |   |
|-----|-------|----------|-------------|---------|--------|--------|---------|---------|---------|---|
|     |       |          | Total       | C       | F      | N      | O       |         |         | S |
| 2   | E     | 1        | Total<br>46 | C<br>34 | F<br>3 | N<br>2 | O<br>6  | S<br>1  | 0       | 0 |
| 2   | E     | 1        | Total<br>88 | C<br>67 | F<br>3 | N<br>4 | O<br>12 | S<br>2  | 0       | 1 |
| 2   | E     | 1        | Total<br>46 | C<br>34 | F<br>3 | N<br>2 | O<br>6  | S<br>1  | 0       | 0 |
| 2   | E     | 1        | Total<br>46 | C<br>34 | F<br>3 | N<br>2 | O<br>6  | S<br>1  | 0       | 0 |

- Molecule 3 is water.

| Mol | Chain | Residues | Atoms        |          | ZeroOcc | AltConf |
|-----|-------|----------|--------------|----------|---------|---------|
| 3   | S     | 713      | Total<br>713 | O<br>713 | 0       | 0       |

### 3 Residue-property plots

These plots are drawn for all protein, RNA, DNA and oligosaccharide chains in the entry. The first graphic for a chain summarises the proportions of the various outlier classes displayed in the second graphic. The second graphic shows the sequence view annotated by issues in geometry and electron density. Residues are color-coded according to the number of geometric quality criteria for which they contain at least one outlier: green = 0, yellow = 1, orange = 2 and red = 3 or more. A red dot above a residue indicates a poor fit to the electron density ( $RSRZ > 2$ ). Stretches of 2 or more consecutive residues without any outlier are shown as a green connector. Residues present in the sample, but not in the model, are shown in grey.

- Molecule 1: Estrogen Receptor

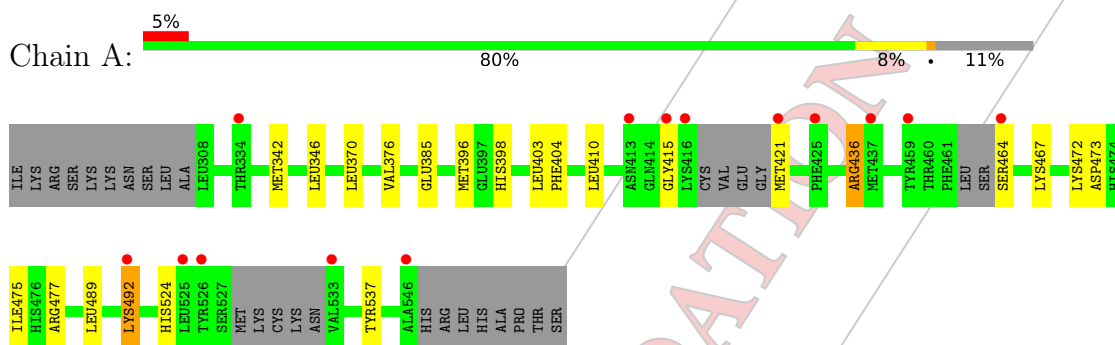

- Molecule 1: Estrogen Receptor

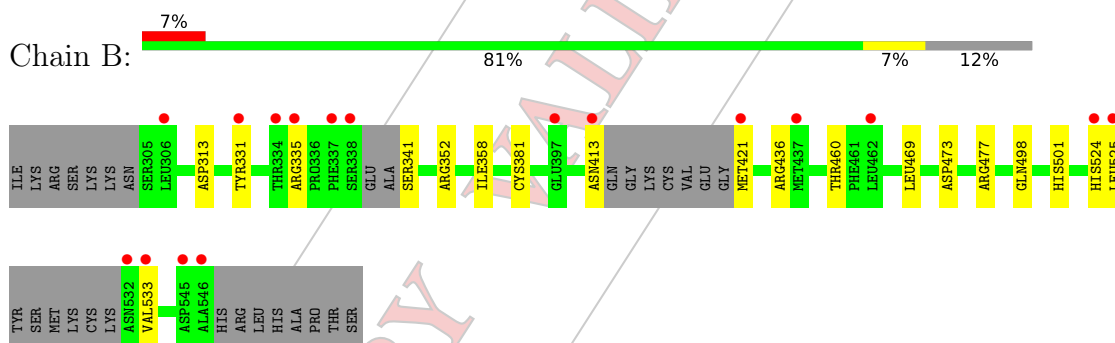

- Molecule 1: Estrogen Receptor

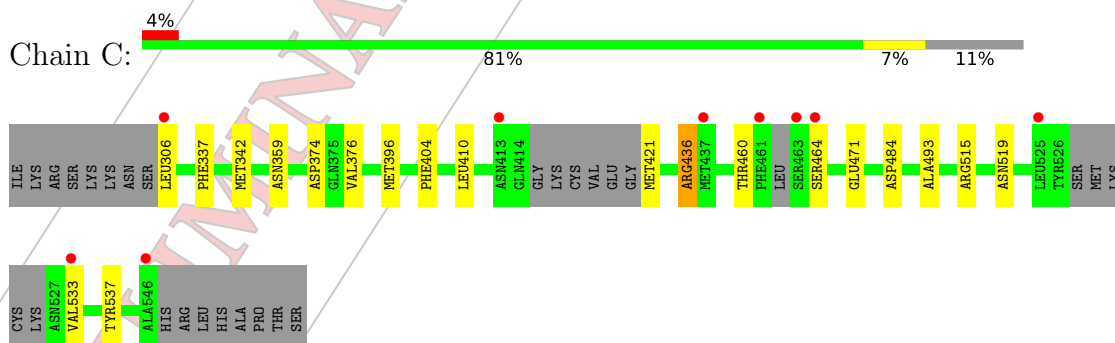

- Molecule 1: Estrogen Receptor

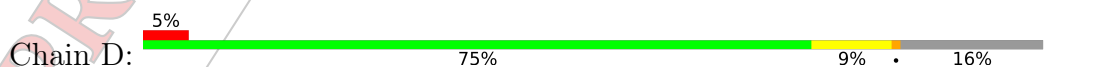

|     |        |        |        |        |        |        |        |        |        |        |        |        |        |        |        |        |        |        |        |        |        |        |        |        |        |     |     |     |     |     |     |     |     |        |        |        |        |        |     |     |     |     |     |        |
|-----|--------|--------|--------|--------|--------|--------|--------|--------|--------|--------|--------|--------|--------|--------|--------|--------|--------|--------|--------|--------|--------|--------|--------|--------|--------|-----|-----|-----|-----|-----|-----|-----|-----|--------|--------|--------|--------|--------|-----|-----|-----|-----|-----|--------|
| ILE | SER468 | LEU469 | ARG477 | HIS488 | LYS492 | HIS501 | LEU509 | HIS516 | HIS524 | LEU525 | TYR526 | SER527 | MET528 | LYS    | CYS    | LYS    | ASN    | VAL533 | ASP545 | ALA    | HIS    | ARG    | LEU    | HIS    | ALA    | PRO | THR | SER |     |     |     |     |     |        |        |        |        |        |     |     |     |     |     |        |
| LYS | LEU306 | ALA307 | LEU308 | TYR331 | ASP332 | PRO333 | THR334 | ARG    | PRO    | PHE    | SER    | GLU    | ALA    | SER341 | MET342 | LEU346 | ILE368 | ASN369 | CYS381 | PHE404 | LEU408 | LEU409 | LEU410 | ASP411 | ARG412 | ASN | GLN | GLY | LYS | CYS | VAL | GLU | GLY | MET421 | ARG436 | TYR459 | THR460 | PHE461 | LEU | SER | SER | THR | LEU | LYS467 |

PRELIMINARY VALIDATION REPORT

## 4 Data and refinement statistics i

| Property                                                                | Value                                                       | Source           |
|-------------------------------------------------------------------------|-------------------------------------------------------------|------------------|
| Space group                                                             | P 1                                                         | Depositor        |
| Cell constants<br>a, b, c, $\alpha$ , $\beta$ , $\gamma$                | 53.53Å 58.62Å 93.90Å<br>86.94° 75.26° 62.85°                | Depositor        |
| Resolution (Å)                                                          | 90.57 – 1.64<br>90.57 – 1.64                                | Depositor<br>EDS |
| % Data completeness<br>(in resolution range)                            | 69.0 (90.57-1.64)<br>69.0 (90.57-1.64)                      | Depositor<br>EDS |
| $R_{merge}$                                                             | (Not available)                                             | Depositor        |
| $R_{sym}$                                                               | (Not available)                                             | Depositor        |
| $\langle I/\sigma(I) \rangle$ <sup>1</sup>                              | 1.47 (at 1.63Å)                                             | Xtrriage         |
| Refinement program                                                      | REFMAC 5.8.0258                                             | Depositor        |
| R, $R_{free}$                                                           | 0.210 , 0.250<br>0.220 , 0.256                              | Depositor<br>DCC |
| $R_{free}$ test set                                                     | 4122 reflections (4.95%)                                    | wwPDB-VP         |
| Wilson B-factor (Å <sup>2</sup> )                                       | 19.9                                                        | Xtrriage         |
| Anisotropy                                                              | 0.027                                                       | Xtrriage         |
| Bulk solvent $k_{sol}$ (e/Å <sup>3</sup> ), $B_{sol}$ (Å <sup>2</sup> ) | 0.39 , 56.4                                                 | EDS              |
| L-test for twinning <sup>2</sup>                                        | $\langle  L  \rangle = 0.50$ , $\langle L^2 \rangle = 0.34$ | Xtrriage         |
| Estimated twinning fraction                                             | 0.107 for h,h-k,h-l                                         | Xtrriage         |
| $F_o, F_c$ correlation                                                  | 0.94                                                        | EDS              |
| Total number of atoms                                                   | 8188                                                        | wwPDB-VP         |
| Average B, all atoms (Å <sup>2</sup> )                                  | 29.0                                                        | wwPDB-VP         |

Xtrriage's analysis on translational NCS is as follows: *The largest off-origin peak in the Patterson function is 6.66% of the height of the origin peak. No significant pseudotranslation is detected.*

<sup>1</sup>Intensities estimated from amplitudes.

<sup>2</sup>Theoretical values of  $\langle |L| \rangle$ ,  $\langle L^2 \rangle$  for acentric reflections are 0.5, 0.333 respectively for untwinned datasets, and 0.375, 0.2 for perfectly twinned datasets.



## 5 Model quality i

### 5.1 Standard geometry i

Bond lengths and bond angles in the following residue types are not validated in this section: LIG, YCM

The Z score for a bond length (or angle) is the number of standard deviations the observed value is removed from the expected value. A bond length (or angle) with  $|Z| > 5$  is considered an outlier worth inspection. RMSZ is the root-mean-square of all Z scores of the bond lengths (or angles).

| Mol | Chain | Bond lengths |         | Bond angles |               |
|-----|-------|--------------|---------|-------------|---------------|
|     |       | RMSZ         | # Z  >5 | RMSZ        | # Z  >5       |
| 1   | A     | 0.62         | 0/1858  | 0.76        | 1/2508 (0.0%) |
| 1   | B     | 0.62         | 0/1852  | 0.81        | 3/2502 (0.1%) |
| 1   | C     | 0.64         | 0/1865  | 0.77        | 2/2518 (0.1%) |
| 1   | D     | 0.64         | 0/1769  | 0.81        | 3/2386 (0.1%) |
| All | All   | 0.63         | 0/7344  | 0.79        | 9/9914 (0.1%) |

Chiral center outliers are detected by calculating the chiral volume of a chiral center and verifying if the center is modelled as a planar moiety or with the opposite hand. A planarity outlier is detected by checking planarity of atoms in a peptide group, atoms in a mainchain group or atoms of a sidechain that are expected to be planar.

| Mol | Chain | #Chirality outliers | #Planarity outliers |
|-----|-------|---------------------|---------------------|
| 1   | D     | 1                   | 0                   |

There are no bond length outliers.

All (9) bond angle outliers are listed below:

| Mol | Chain | Res | Type | Atoms     | Z     | Observed(°) | Ideal(°) |
|-----|-------|-----|------|-----------|-------|-------------|----------|
| 1   | C     | 436 | ARG  | NE-CZ-NH1 | 9.65  | 125.12      | 120.30   |
| 1   | A     | 436 | ARG  | NE-CZ-NH1 | 9.04  | 124.82      | 120.30   |
| 1   | B     | 436 | ARG  | NE-CZ-NH2 | -8.29 | 116.16      | 120.30   |
| 1   | D     | 436 | ARG  | NE-CZ-NH2 | -7.40 | 116.60      | 120.30   |
| 1   | C     | 515 | ARG  | NE-CZ-NH2 | -6.16 | 117.22      | 120.30   |
| 1   | B     | 313 | ASP  | CB-CG-OD1 | 5.79  | 123.51      | 118.30   |
| 1   | D     | 334 | THR  | N-CA-CB   | 5.59  | 120.91      | 110.30   |
| 1   | B     | 352 | ARG  | NE-CZ-NH1 | 5.26  | 122.93      | 120.30   |
| 1   | D     | 359 | ASN  | CB-CA-C   | 5.15  | 120.70      | 110.40   |

All (1) chirality outliers are listed below:

| Mol | Chain | Res | Type | Atom |
|-----|-------|-----|------|------|
| 1   | D     | 334 | THR  | CA   |

There are no planarity outliers.

## 5.2 Too-close contacts [i](#)

In the following table, the Non-H and H(model) columns list the number of non-hydrogen atoms and hydrogen atoms in the chain respectively. The H(added) column lists the number of hydrogen atoms added and optimized by MolProbity. The Clashes column lists the number of clashes within the asymmetric unit, whereas Symm-Clashes lists symmetry related clashes.

| Mol | Chain | Non-H | H(model) | H(added) | Clashes | Symm-Clashes |
|-----|-------|-------|----------|----------|---------|--------------|
| 1   | A     | 1836  | 0        | 1873     | 18      | 1            |
| 1   | B     | 1831  | 0        | 1863     | 15      | 1            |
| 1   | C     | 1843  | 0        | 1873     | 14      | 1            |
| 1   | D     | 1739  | 0        | 1777     | 16      | 1            |
| 2   | E     | 226   | 0        | 1        | 3       | 0            |
| 3   | S     | 713   | 0        | 0        | 15      | 0            |
| All | All   | 8188  | 0        | 7387     | 61      | 2            |

The all-atom clashscore is defined as the number of clashes found per 1000 atoms (including hydrogen atoms). The all-atom clashscore for this structure is 4.

All (61) close contacts within the same asymmetric unit are listed below, sorted by their clash magnitude.

| Atom-1           | Atom-2           | Interatomic distance (Å) | Clash overlap (Å) |
|------------------|------------------|--------------------------|-------------------|
| 1:A:370:LEU:HD11 | 1:A:475:ILE:HD11 | 1.33                     | 1.06              |
| 1:D:381:CYS:SG   | 3:S:380:HOH:O    | 2.20                     | 0.97              |
| 2:E:2[B]:LIG:C12 | 2:E:2[B]:LIG:O04 | 2.19                     | 0.85              |
| 1:B:525:LEU:HD11 | 1:B:533:VAL:HG11 | 1.63                     | 0.80              |
| 1:B:381:YCM:NZ2  | 3:S:410:HOH:O    | 2.17                     | 0.77              |
| 1:D:342:MET:O    | 1:D:346:LEU:HD23 | 1.87                     | 0.75              |
| 1:C:533:VAL:N    | 3:S:553:HOH:O    | 2.20                     | 0.73              |
| 1:A:473:ASP:OD2  | 1:A:477:ARG:CZ   | 2.38                     | 0.72              |
| 1:A:421:MET:HG3  | 1:A:524:HIS:NE2  | 2.04                     | 0.72              |
| 1:A:467:LYS:NZ   | 3:S:642:HOH:O    | 2.26                     | 0.67              |
| 1:B:524:HIS:ND1  | 2:E:2[B]:LIG:C06 | 2.58                     | 0.67              |
| 1:A:489:LEU:O    | 1:A:492:LYS:HG3  | 1.94                     | 0.66              |
| 1:B:477:ARG:NH2  | 3:S:429:HOH:O    | 2.26                     | 0.65              |
| 1:A:385:GLU:OE1  | 3:S:147:HOH:O    | 2.14                     | 0.64              |
| 1:B:341:SER:N    | 3:S:381:HOH:O    | 2.30                     | 0.64              |

*Continued on next page...*

Continued from previous page...

| Atom-1             | Atom-2           | Interatomic distance (Å) | Clash overlap (Å) |
|--------------------|------------------|--------------------------|-------------------|
| 1:C:484:ASP:OD1    | 1:D:501:HIS:HE1  | 1.80                     | 0.63              |
| 1:B:525:LEU:HD21   | 1:B:533:VAL:HG11 | 1.84                     | 0.60              |
| 1:D:346:LEU:CD2    | 1:D:408:LEU:HD21 | 2.33                     | 0.58              |
| 1:A:472:LYS:NZ     | 3:S:614:HOH:O    | 2.33                     | 0.58              |
| 1:D:346:LEU:HD11   | 1:D:404:PHE:CD2  | 2.39                     | 0.58              |
| 1:B:524:HIS:CE1    | 2:E:2[B]:LIG:C06 | 2.89                     | 0.56              |
| 1:D:341:SER:N      | 3:S:629:HOH:O    | 2.38                     | 0.56              |
| 1:D:346:LEU:HD22   | 1:D:408:LEU:HD21 | 1.89                     | 0.55              |
| 1:A:489:LEU:O      | 1:A:492:LYS:HE3  | 2.07                     | 0.54              |
| 1:C:460:THR:HG21   | 3:S:139:HOH:O    | 2.07                     | 0.54              |
| 1:D:308:LEU:HD11   | 1:D:477:ARG:HE   | 1.73                     | 0.54              |
| 1:A:370:LEU:CD1    | 1:A:475:ILE:HD11 | 2.23                     | 0.53              |
| 1:C:396:MET:O      | 1:C:436:ARG:HD3  | 2.09                     | 0.53              |
| 1:C:306:LEU:N      | 3:S:766:HOH:O    | 2.42                     | 0.52              |
| 1:A:396:MET:O      | 1:A:436:ARG:HD3  | 2.11                     | 0.51              |
| 1:D:404:PHE:CE1    | 1:D:410:LEU:HD12 | 2.46                     | 0.51              |
| 1:B:525:LEU:HB3    | 3:S:412:HOH:O    | 2.11                     | 0.51              |
| 1:D:525:LEU:O      | 1:D:526:TYR:HB2  | 2.12                     | 0.49              |
| 1:A:473:ASP:OD2    | 1:A:477:ARG:NH2  | 2.47                     | 0.48              |
| 1:A:421:MET:CG     | 1:A:524:HIS:NE2  | 2.77                     | 0.47              |
| 1:A:342:MET:CE     | 1:A:346:LEU:HG   | 2.44                     | 0.47              |
| 1:B:413:ASN:C      | 1:B:413:ASN:OD1  | 2.52                     | 0.47              |
| 1:C:359:ASN:OD1    | 3:S:570:HOH:O    | 2.20                     | 0.46              |
| 1:C:337:PHE:CD2    | 1:C:342:MET:CE   | 2.99                     | 0.45              |
| 1:B:335:ARG:HB3    | 1:B:335:ARG:CZ   | 2.47                     | 0.45              |
| 1:C:337:PHE:CD2    | 1:C:342:MET:HE2  | 2.52                     | 0.45              |
| 1:A:342:MET:CE     | 1:A:346:LEU:HD21 | 2.47                     | 0.44              |
| 1:C:306:LEU:CA     | 3:S:766:HOH:O    | 2.66                     | 0.44              |
| 1:A:404:PHE:CE2    | 1:A:410:LEU:HD12 | 2.53                     | 0.44              |
| 1:C:404:PHE:CE2    | 1:C:410:LEU:HD12 | 2.53                     | 0.44              |
| 1:D:346:LEU:CD1    | 1:D:404:PHE:CD2  | 3.01                     | 0.43              |
| 1:C:519:ASN:HD21   | 1:D:516:HIS:HA   | 1.83                     | 0.43              |
| 1:A:342:MET:HE3    | 1:A:346:LEU:HG   | 2.00                     | 0.43              |
| 1:B:473[A]:ASP:OD2 | 1:B:477:ARG:NH2  | 2.52                     | 0.42              |
| 1:B:469:LEU:HD13   | 1:C:493:ALA:O    | 2.20                     | 0.42              |
| 1:B:498:GLN:HA     | 1:B:501:HIS:CE1  | 2.55                     | 0.42              |
| 1:D:527:SER:OG     | 1:D:533:ALA:HB3  | 2.20                     | 0.42              |
| 1:C:376:VAL:HG11   | 1:C:537:TYR:CD2  | 2.55                     | 0.42              |
| 1:D:488:HIS:NE2    | 1:D:492:LYS:HD2  | 2.35                     | 0.41              |
| 1:A:398:HIS:CE1    | 1:A:403:LEU:HD12 | 2.55                     | 0.41              |
| 1:D:509:LEU:HD23   | 1:D:509:LEU:HA   | 1.97                     | 0.41              |

Continued on next page...

Continued from previous page...

| Atom-1           | Atom-2           | Interatomic distance (Å) | Clash overlap (Å) |
|------------------|------------------|--------------------------|-------------------|
| 1:D:346:LEU:HD21 | 1:D:408:LEU:HD21 | 2.02                     | 0.41              |
| 1:A:376:VAL:HG11 | 1:A:537:TYR:CD2  | 2.57                     | 0.40              |
| 1:B:460:THR:HG23 | 3:S:116:HOH:O    | 2.22                     | 0.40              |
| 1:B:525:LEU:CD1  | 1:B:533:VAL:HG11 | 2.43                     | 0.40              |
| 1:C:374:ASP:OD2  | 1:C:471:GLU:OE1  | 2.40                     | 0.40              |

All (2) symmetry-related close contacts are listed below. The label for Atom-2 includes the symmetry operator and encoded unit-cell translations to be applied.

| Atom-1         | Atom-2                | Interatomic distance (Å) | Clash overlap (Å) |
|----------------|-----------------------|--------------------------|-------------------|
| 1:A:464:SER:OG | 1:D:333:PRO:O[1_566]  | 1.99                     | 0.21              |
| 1:B:335:ARG:O  | 1:C:464:SER:OG[1_466] | 2.17                     | 0.03              |

## 5.3 Torsion angles [i](#)

### 5.3.1 Protein backbone [i](#)

In the following table, the Percentiles column shows the percent Ramachandran outliers of the chain as a percentile score with respect to all X-ray entries followed by that with respect to entries of similar resolution.

The Analysed column shows the number of residues for which the backbone conformation was analysed, and the total number of residues.

| Mol | Chain | Analysed       | Favoured   | Allowed | Outliers | Percentiles |     |
|-----|-------|----------------|------------|---------|----------|-------------|-----|
| 1   | A     | 220/257 (86%)  | 218 (99%)  | 1 (0%)  | 1 (0%)   | 29          | 11  |
| 1   | B     | 220/257 (86%)  | 216 (98%)  | 4 (2%)  | 0        | 100         | 100 |
| 1   | C     | 221/257 (86%)  | 220 (100%) | 1 (0%)  | 0        | 100         | 100 |
| 1   | D     | 207/257 (80%)  | 203 (98%)  | 3 (1%)  | 1 (0%)   | 29          | 11  |
| All | All   | 868/1028 (84%) | 857 (99%)  | 9 (1%)  | 2 (0%)   | 47          | 26  |

All (2) Ramachandran outliers are listed below:

| Mol | Chain | Res | Type |
|-----|-------|-----|------|
| 1   | D     | 526 | TYR  |
| 1   | A     | 415 | GLY  |

### 5.3.2 Protein sidechains [i](#)

In the following table, the Percentiles column shows the percent sidechain outliers of the chain as a percentile score with respect to all X-ray entries followed by that with respect to entries of similar resolution.

The Analysed column shows the number of residues for which the sidechain conformation was analysed, and the total number of residues.

| Mol | Chain | Analysed      | Rotameric  | Outliers | Percentiles |    |
|-----|-------|---------------|------------|----------|-------------|----|
| 1   | A     | 206/232 (89%) | 205 (100%) | 1 (0%)   | 88          | 80 |
| 1   | B     | 207/232 (89%) | 204 (99%)  | 3 (1%)   | 67          | 45 |
| 1   | C     | 206/232 (89%) | 205 (100%) | 1 (0%)   | 88          | 80 |
| 1   | D     | 196/232 (84%) | 192 (98%)  | 4 (2%)   | 55          | 29 |
| All | All   | 815/928 (88%) | 806 (99%)  | 9 (1%)   | 73          | 55 |

All (9) residues with a non-rotameric sidechain are listed below:

| Mol | Chain | Res | Type |
|-----|-------|-----|------|
| 1   | A     | 492 | LYS  |
| 1   | B     | 331 | TYR  |
| 1   | B     | 358 | ILE  |
| 1   | B     | 421 | MET  |
| 1   | C     | 421 | MET  |
| 1   | D     | 306 | LEU  |
| 1   | D     | 331 | TYR  |
| 1   | D     | 346 | LEU  |
| 1   | D     | 358 | ILE  |

Some sidechains can be flipped to improve hydrogen bonding and reduce clashes. All (9) such sidechains are listed below:

| Mol | Chain | Res | Type |
|-----|-------|-----|------|
| 1   | A     | 398 | HIS  |
| 1   | A     | 519 | ASN  |
| 1   | B     | 398 | HIS  |
| 1   | B     | 498 | GLN  |
| 1   | B     | 519 | ASN  |
| 1   | C     | 519 | ASN  |
| 1   | D     | 501 | HIS  |
| 1   | D     | 513 | HIS  |
| 1   | D     | 519 | ASN  |

### 5.3.3 RNA [i](#)

There are no RNA molecules in this entry.

### 5.4 Non-standard residues in protein, DNA, RNA chains [i](#)

There are no non-standard protein/DNA/RNA residues in this entry.

### 5.5 Carbohydrates [i](#)

There are no monosaccharides in this entry.

### 5.6 Ligand geometry [i](#)

Of 5 ligands modelled in this entry, 5 could not be matched to an existing wwPDB Chemical Component Dictionary definition at this stage - leaving 0 for Mogul analysis.

There are no bond length outliers.

There are no bond angle outliers.

There are no chirality outliers.

There are no torsion outliers.

There are no ring outliers.

No monomer is involved in short contacts.

The following is a two-dimensional graphical depiction of Mogul quality analysis of bond lengths, bond angles, torsion angles, and ring geometry for all instances of the Ligand of Interest. In addition, ligands with molecular weight > 250 and outliers as shown on the validation Tables will also be included. For torsion angles, if less than 5% of the Mogul distribution of torsion angles is within 10 degrees of the torsion angle in question, then that torsion angle is considered an outlier. Any bond that is central to one or more torsion angles identified as an outlier by Mogul will be highlighted in the graph. For rings, the root-mean-square deviation (RMSD) between the ring in question and similar rings identified by Mogul is calculated over all ring torsion angles. If the average RMSD is greater than 60 degrees and the minimal RMSD between the ring in question and any Mogul-identified rings is also greater than 60 degrees, then that ring is considered an outlier. The outliers are highlighted in purple. The color gray indicates Mogul did not find sufficient equivalents in the CSD to analyse the geometry.

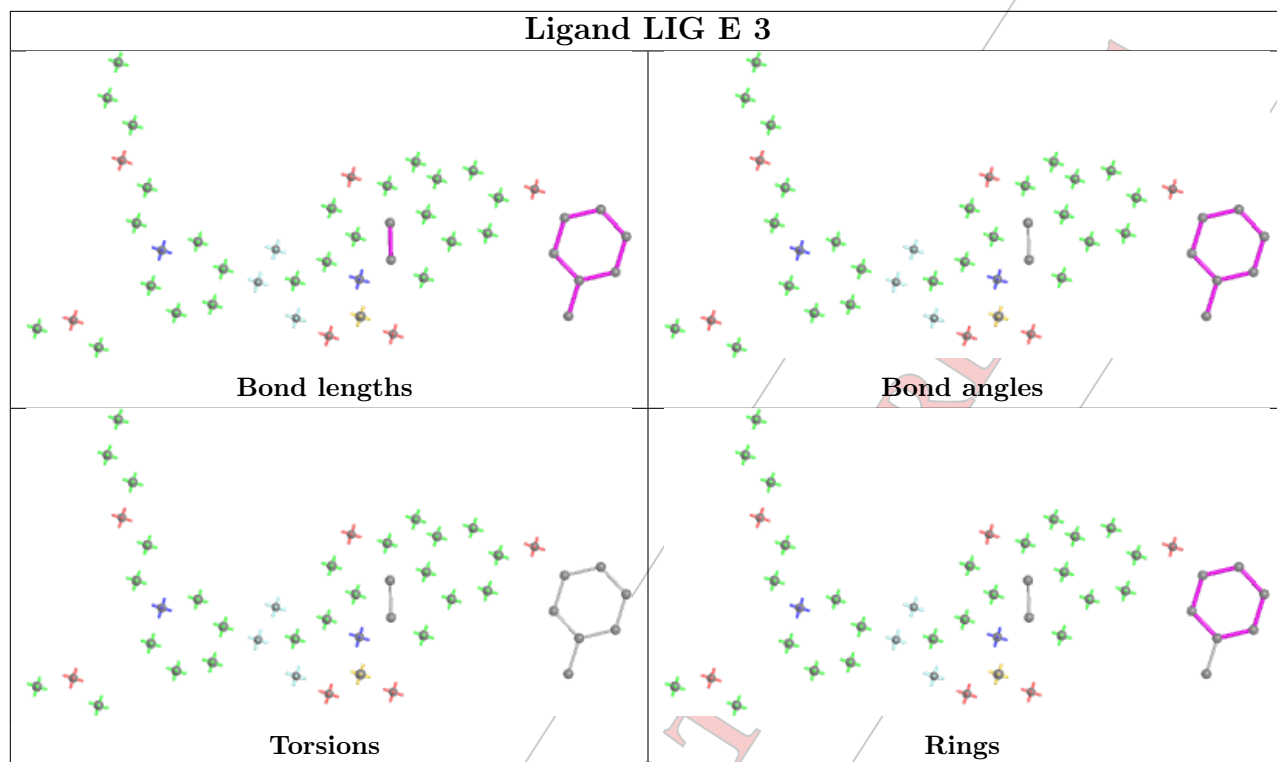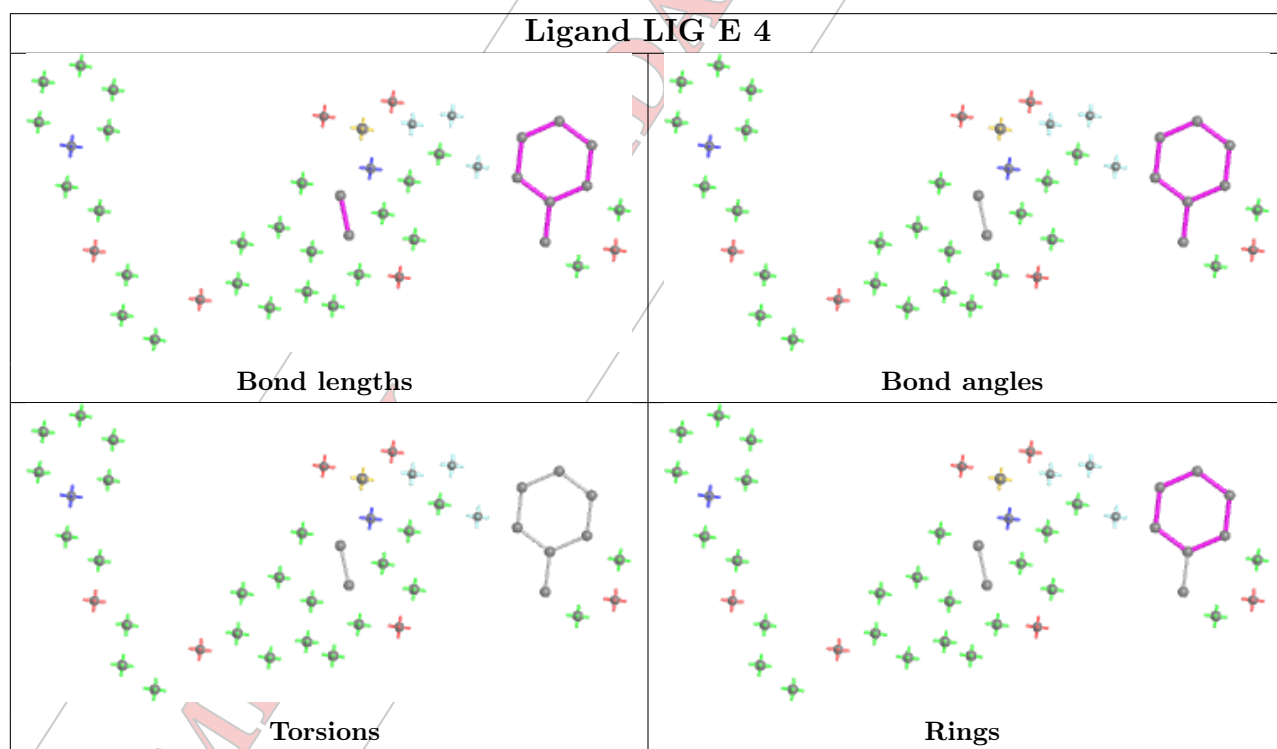

PRELIM

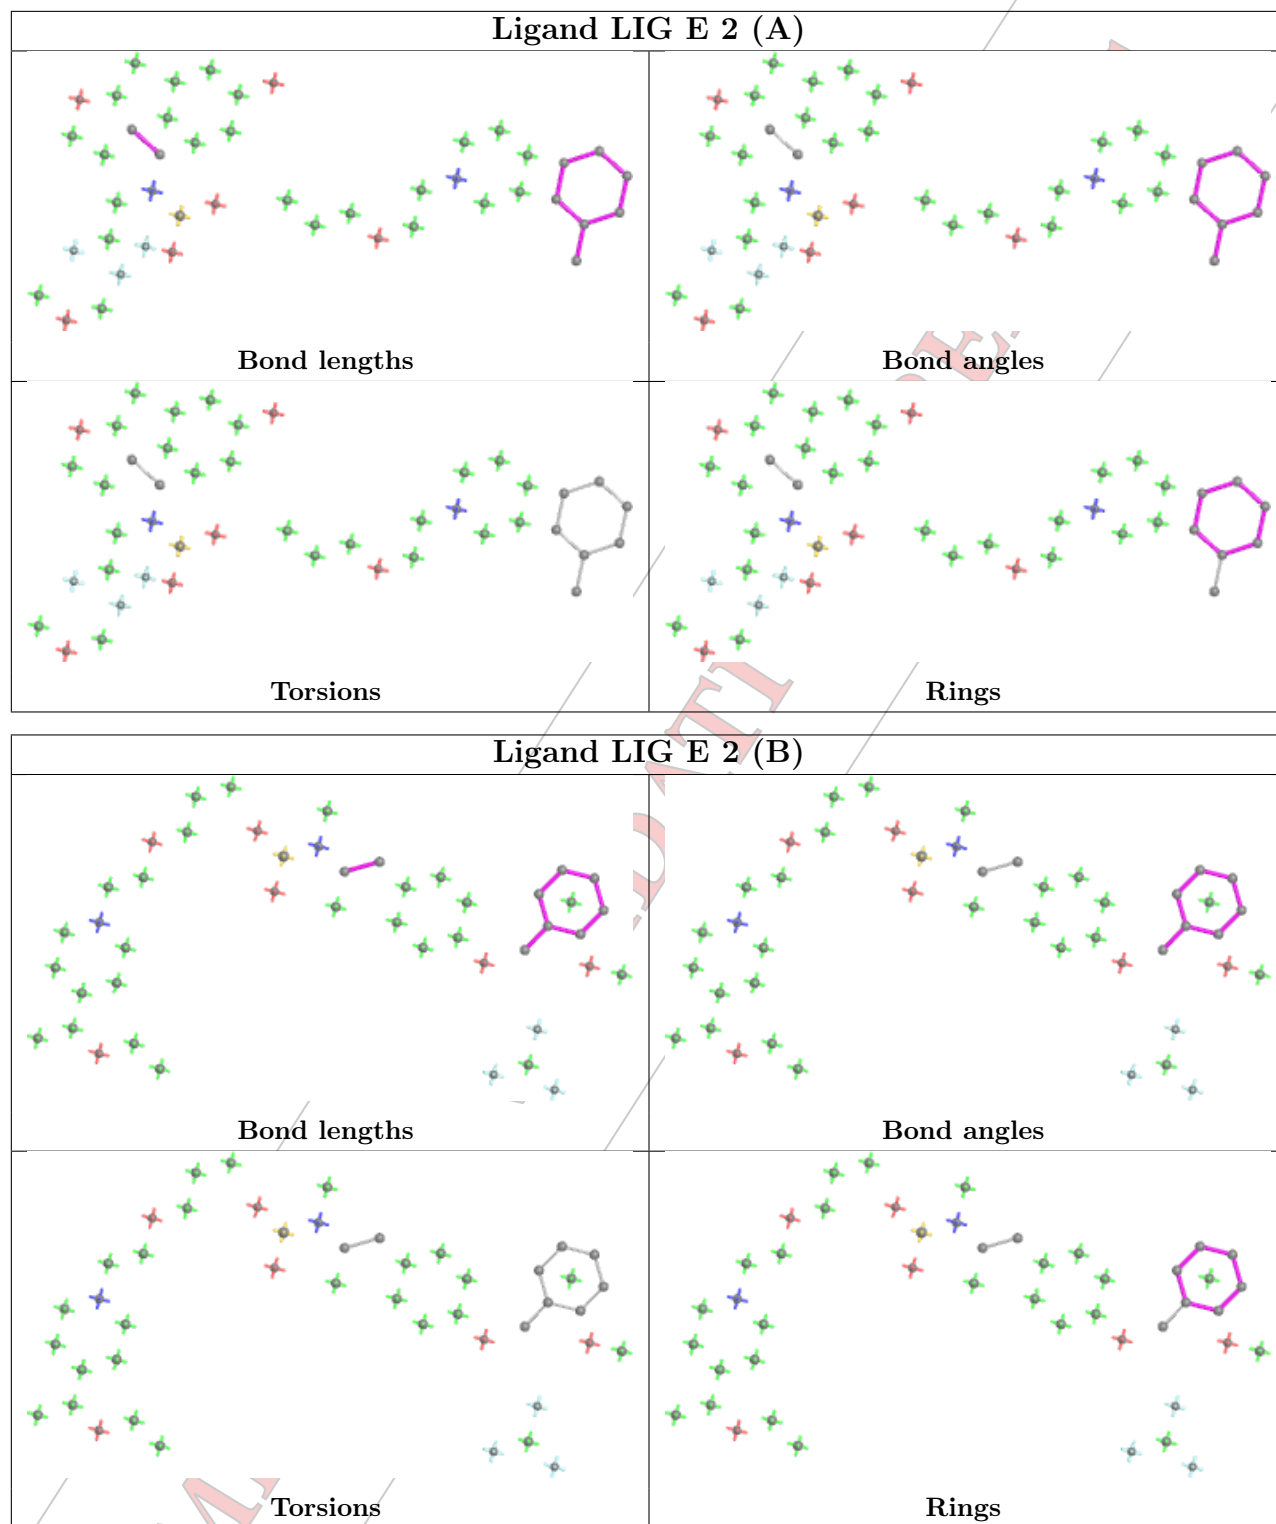

PRELIM



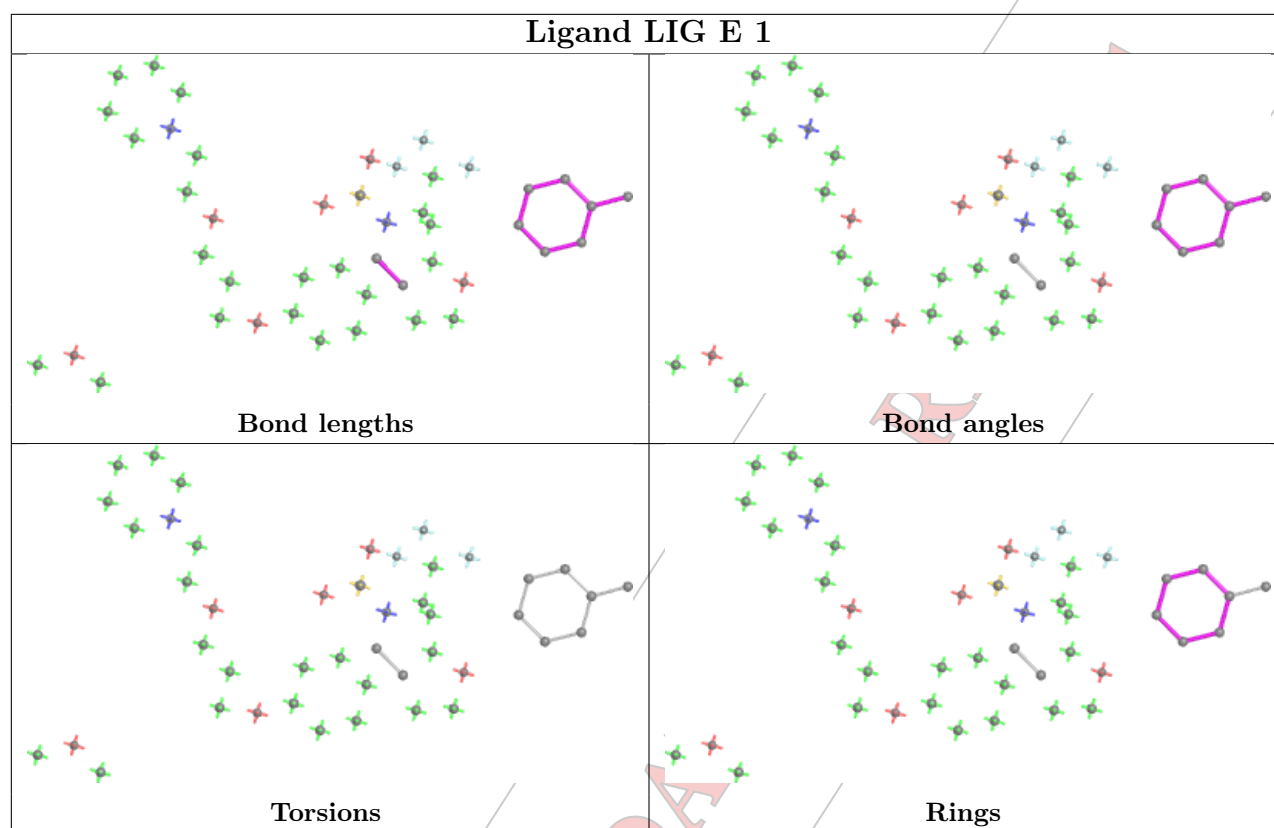

## 5.7 Other polymers [\(i\)](#)

There are no such residues in this entry.

## 5.8 Polymer linkage issues [\(i\)](#)

The following chains have linkage breaks:

| Mol | Chain | Number of breaks |
|-----|-------|------------------|
| 1   | C     | 1                |

All chain breaks are listed below:

| Model | Chain | Residue-1 | Atom-1 | Residue-2 | Atom-2 | Distance (Å) |
|-------|-------|-----------|--------|-----------|--------|--------------|
| 1     | C     | 527:ALA   | C      | 533:VAL   | N      | 10.52        |

## 6 Fit of model and data i

### 6.1 Protein, DNA and RNA chains i

In the following table, the column labelled '#RSRZ > 2' contains the number (and percentage) of RSRZ outliers, followed by percent RSRZ outliers for the chain as percentile scores relative to all X-ray entries and entries of similar resolution. The OWAB column contains the minimum, median, 95<sup>th</sup> percentile and maximum values of the occupancy-weighted average B-factor per residue. The column labelled 'Q < 0.9' lists the number of (and percentage) of residues with an average occupancy less than 0.9.

| Mol | Chain | Analysed       | <RSRZ> | #RSRZ>2       | OWAB(Å <sup>2</sup> ) | Q<0.9 |
|-----|-------|----------------|--------|---------------|-----------------------|-------|
| 1   | A     | 227/257 (88%)  | 0.25   | 14 (6%) 20 17 | 14, 26, 50, 76        | 0     |
| 1   | B     | 226/257 (87%)  | 0.27   | 17 (7%) 14 12 | 12, 24, 61, 74        | 0     |
| 1   | C     | 228/257 (88%)  | 0.15   | 9 (3%) 39 37  | 12, 24, 48, 66        | 0     |
| 1   | D     | 217/257 (84%)  | 0.25   | 14 (6%) 18 16 | 13, 24, 57, 85        | 0     |
| All | All   | 898/1028 (87%) | 0.23   | 54 (6%) 21 19 | 12, 25, 55, 85        | 0     |

All (54) RSRZ outliers are listed below:

| Mol | Chain | Res | Type | RSRZ |
|-----|-------|-----|------|------|
| 1   | A     | 533 | VAL  | 7.2  |
| 1   | B     | 546 | ALA  | 5.6  |
| 1   | B     | 306 | LEU  | 5.5  |
| 1   | A     | 546 | ALA  | 5.5  |
| 1   | B     | 532 | ASN  | 5.4  |
| 1   | C     | 533 | VAL  | 5.0  |
| 1   | D     | 533 | ALA  | 4.7  |
| 1   | B     | 337 | PHE  | 4.6  |
| 1   | D     | 421 | MET  | 4.5  |
| 1   | C     | 546 | ALA  | 4.4  |
| 1   | A     | 415 | GLY  | 4.3  |
| 1   | B     | 462 | LEU  | 4.2  |
| 1   | C     | 306 | LEU  | 4.1  |
| 1   | B     | 533 | VAL  | 3.8  |
| 1   | D     | 527 | SER  | 3.8  |
| 1   | B     | 413 | ASN  | 3.8  |
| 1   | D     | 468 | SER  | 3.6  |
| 1   | A     | 413 | ASN  | 3.6  |
| 1   | B     | 525 | LEU  | 3.6  |
| 1   | A     | 421 | MET  | 3.5  |
| 1   | D     | 526 | TYR  | 3.5  |

*Continued on next page...*

Continued from previous page...

| Mol | Chain | Res | Type | RSRZ |
|-----|-------|-----|------|------|
| 1   | C     | 461 | PHE  | 3.4  |
| 1   | D     | 524 | HIS  | 3.3  |
| 1   | C     | 413 | ASN  | 3.3  |
| 1   | D     | 525 | LEU  | 3.3  |
| 1   | D     | 459 | TYR  | 3.2  |
| 1   | D     | 469 | LEU  | 3.1  |
| 1   | D     | 306 | LEU  | 3.1  |
| 1   | B     | 524 | HIS  | 3.1  |
| 1   | B     | 331 | TYR  | 3.0  |
| 1   | D     | 467 | LYS  | 3.0  |
| 1   | A     | 492 | LYS  | 2.8  |
| 1   | A     | 464 | SER  | 2.8  |
| 1   | D     | 528 | MET  | 2.8  |
| 1   | B     | 421 | MET  | 2.7  |
| 1   | D     | 331 | TYR  | 2.7  |
| 1   | C     | 463 | SER  | 2.7  |
| 1   | B     | 335 | ARG  | 2.6  |
| 1   | C     | 464 | SER  | 2.6  |
| 1   | A     | 459 | TYR  | 2.5  |
| 1   | C     | 525 | LEU  | 2.5  |
| 1   | B     | 397 | GLU  | 2.4  |
| 1   | A     | 416 | LYS  | 2.4  |
| 1   | B     | 338 | SER  | 2.3  |
| 1   | A     | 525 | LEU  | 2.3  |
| 1   | A     | 437 | MET  | 2.2  |
| 1   | A     | 334 | THR  | 2.2  |
| 1   | B     | 545 | ASP  | 2.2  |
| 1   | D     | 461 | PHE  | 2.2  |
| 1   | A     | 425 | PHE  | 2.0  |
| 1   | B     | 437 | MET  | 2.0  |
| 1   | C     | 437 | MET  | 2.0  |
| 1   | A     | 526 | TYR  | 2.0  |
| 1   | B     | 334 | THR  | 2.0  |

## 6.2 Non-standard residues in protein, DNA, RNA chains [i](#)

There are no non-standard protein/DNA/RNA residues in this entry.

## 6.3 Carbohydrates [i](#)

There are no monosaccharides in this entry.

## 6.4 Ligands [i](#)

In the following table, the Atoms column lists the number of modelled atoms in the group and the number defined in the chemical component dictionary. The B-factors column lists the minimum, median, 95<sup>th</sup> percentile and maximum values of B factors of atoms in the group. The column labelled 'Q<0.9' lists the number of atoms with occupancy less than 0.9.

| Mol | Type | Chain | Res  | Atoms | RSCC | RSR  | B-factors(Å <sup>2</sup> ) | Q<0.9 |
|-----|------|-------|------|-------|------|------|----------------------------|-------|
| 2   | LIG  | E     | 4    | 46/?  | 0.88 | 0.13 | 23,33,45,47                | 0     |
| 2   | LIG  | E     | 2[A] | 46/?  | 0.88 | 0.16 | 18,25,30,30                | 46    |
| 2   | LIG  | E     | 2[B] | 42/?  | 0.88 | 0.16 | 24,32,36,37                | 42    |
| 2   | LIG  | E     | 3    | 46/?  | 0.90 | 0.12 | 19,31,42,45                | 0     |
| 2   | LIG  | E     | 1    | 46/?  | 0.90 | 0.12 | 21,31,39,41                | 0     |

The following is a graphical depiction of the model fit to experimental electron density of all instances of the Ligand of Interest. In addition, ligands with molecular weight > 250 and outliers as shown on the geometry validation Tables will also be included. Each fit is shown from different orientation to approximate a three-dimensional view.

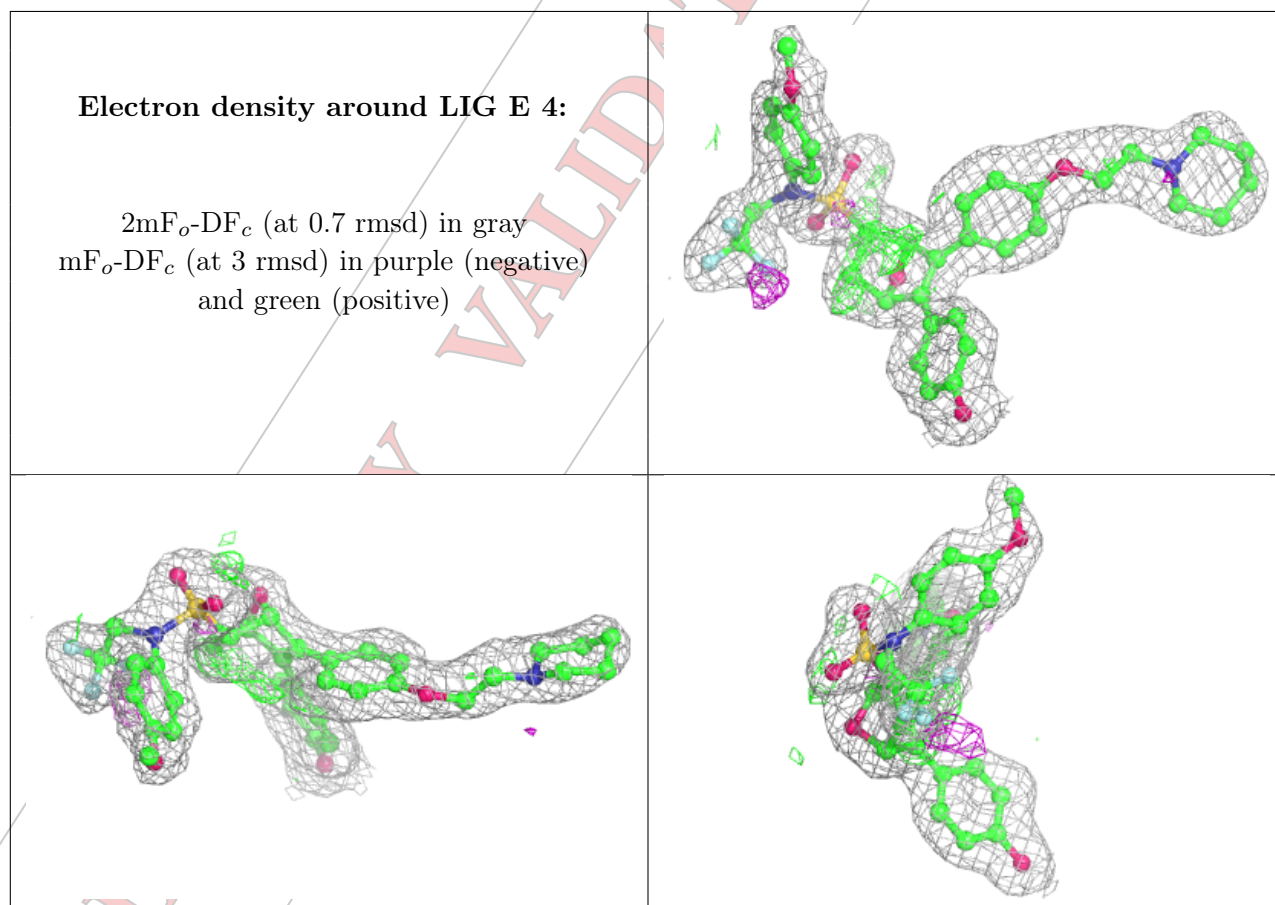

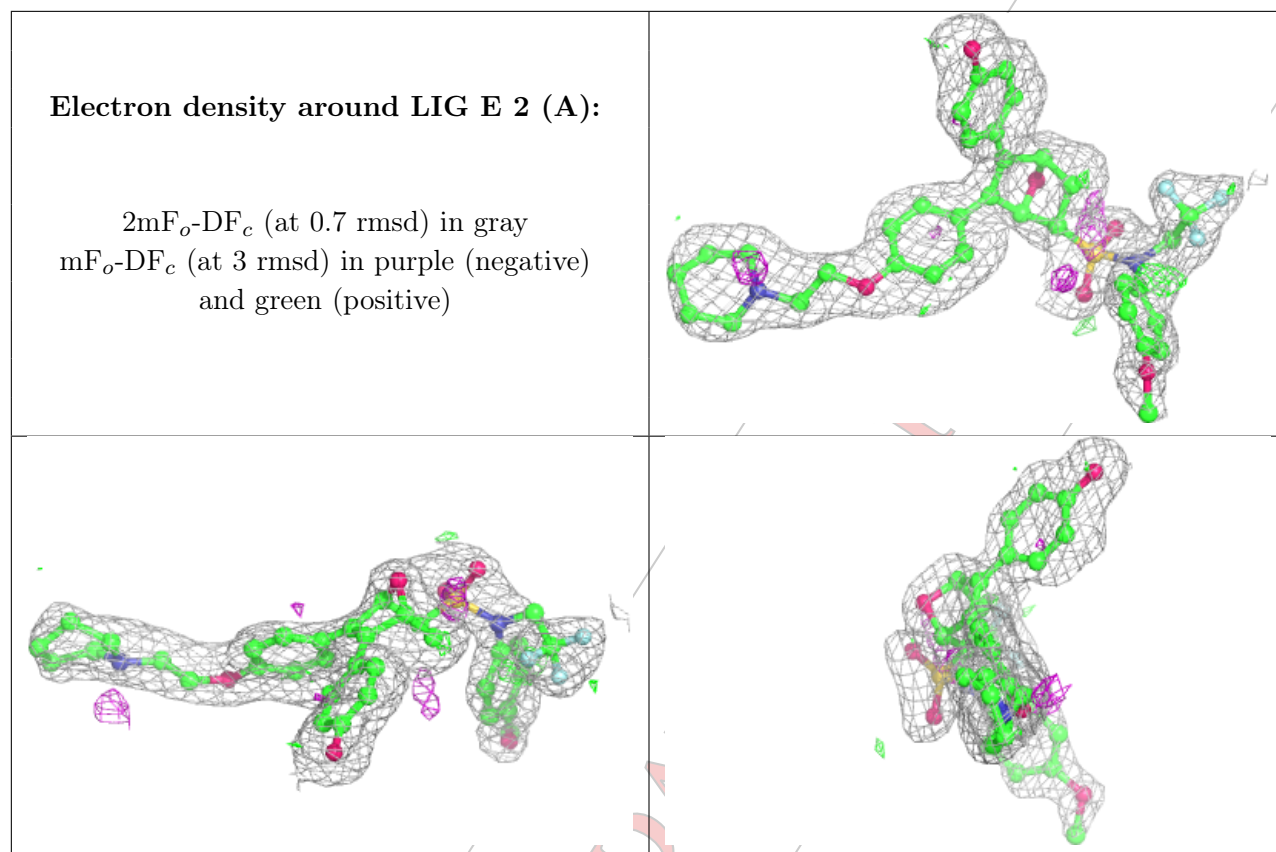

PRELIMINARY VALIDATION

**Electron density around LIG E 2 (B):**

$2mF_o-DF_c$  (at 0.7 rmsd) in gray  
 $mF_o-DF_c$  (at 3 rmsd) in purple (negative)  
and green (positive)

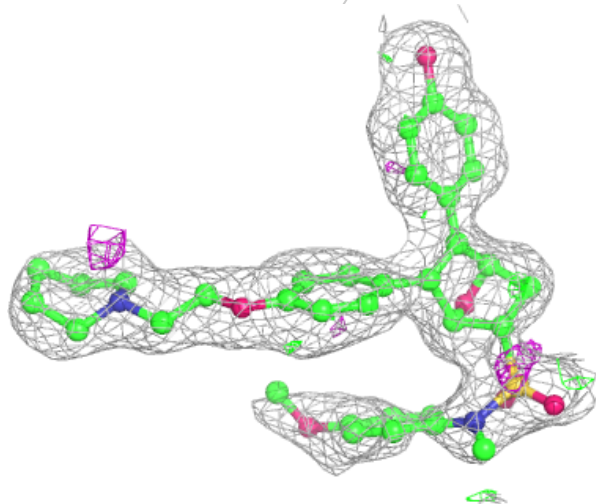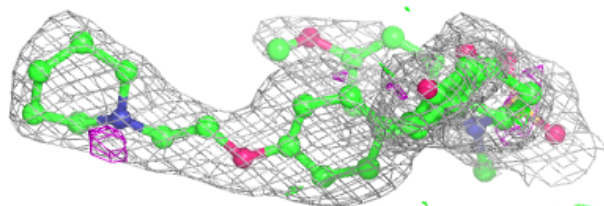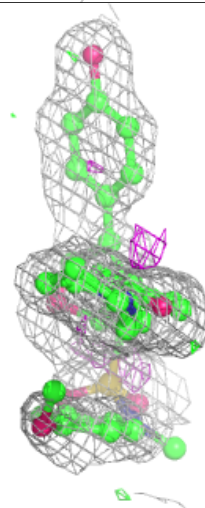

PRELIMINARY

**Electron density around LIG E 3:**

$2mF_o-DF_c$  (at 0.7 rmsd) in gray  
 $mF_o-DF_c$  (at 3 rmsd) in purple (negative)  
and green (positive)

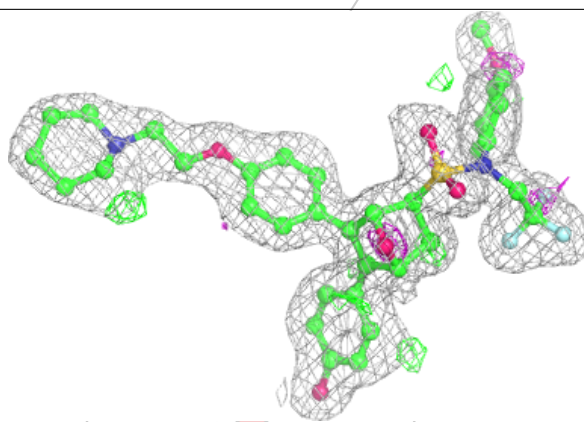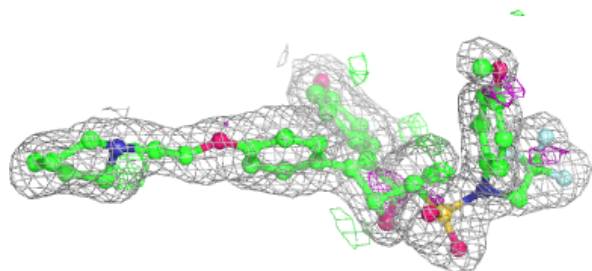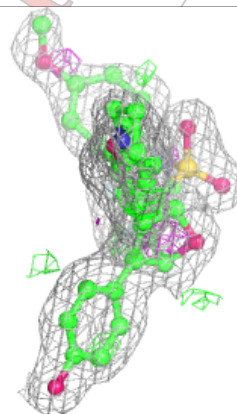**Electron density around LIG E 1:**

$2mF_o-DF_c$  (at 0.7 rmsd) in gray  
 $mF_o-DF_c$  (at 3 rmsd) in purple (negative)  
and green (positive)

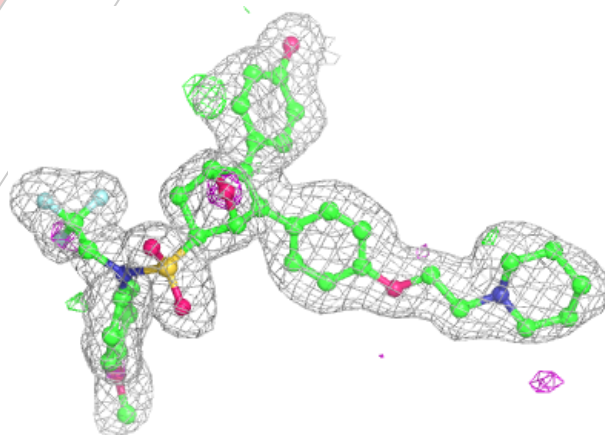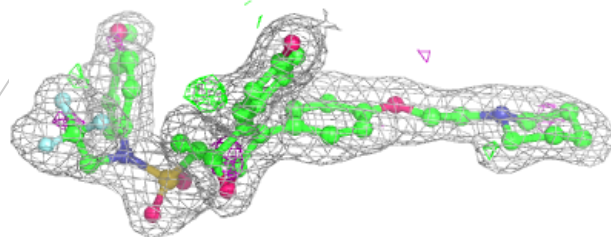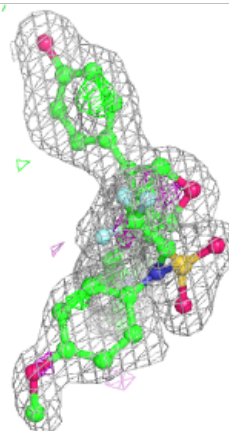

## 6.5 Other polymers [i](#)

There are no such residues in this entry.

**PRELIMINARY VALIDATION REPORT**





# Preliminary Full wwPDB X-ray Structure Validation Report ⓘ

Aug 9, 2020 – 09:16 PM EDT

Deposition ID : D\_1000251214

This is a Preliminary Full wwPDB X-ray Structure Validation Report.

This report is produced by the wwPDB Deposition System during initial deposition but before annotation of the structure.

We welcome your comments at [validation@mail.wwpdb.org](mailto:validation@mail.wwpdb.org)

A user guide is available at

<https://www.wwpdb.org/validation/2017/XrayValidationReportHelp>

with specific help available everywhere you see the ⓘ symbol.

---

The following versions of software and data (see [references ⓘ](#)) were used in the production of this report:

|                                |   |                                                                    |
|--------------------------------|---|--------------------------------------------------------------------|
| MolProbity                     | : | 4.02b-467                                                          |
| Mogul                          | : | 1.8.5 (274361), CSD as541be (2020)                                 |
| Xtriage (Phenix)               | : | 1.13                                                               |
| EDS                            | : | 2.13.1                                                             |
| buster-report                  | : | 1.1.7 (2018)                                                       |
| Percentile statistics          | : | 20191225.v01 (using entries in the PDB archive December 25th 2019) |
| Refmac                         | : | 5.8.0158                                                           |
| CCP4                           | : | 7.0.044 (Gargrove)                                                 |
| Ideal geometry (proteins)      | : | Engh & Huber (2001)                                                |
| Ideal geometry (DNA, RNA)      | : | Parkinson et al. (1996)                                            |
| Validation Pipeline (wwPDB-VP) | : | 2.13.1                                                             |

# 1 Overall quality at a glance i

The following experimental techniques were used to determine the structure:  
*X-RAY DIFFRACTION*

The reported resolution of this entry is 1.97 Å.

Percentile scores (ranging between 0-100) for global validation metrics of the entry are shown in the following graphic. The table shows the number of entries on which the scores are based.

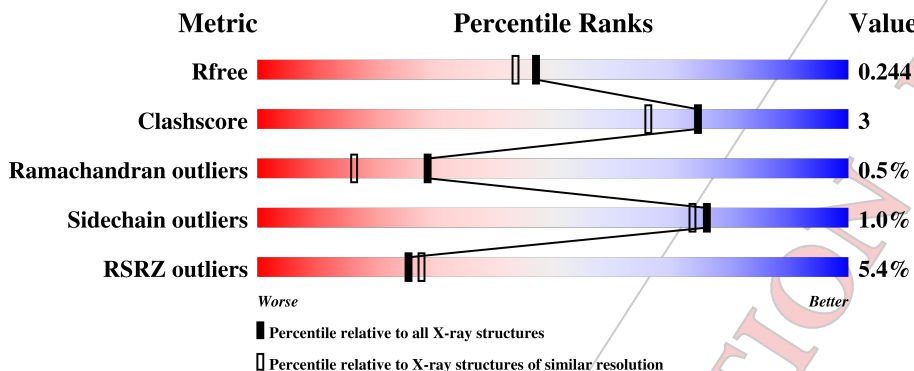

| Metric                | Whole archive (#Entries) | Similar resolution (#Entries, resolution range(Å)) |
|-----------------------|--------------------------|----------------------------------------------------|
| $R_{free}$            | 130704                   | 11647 (2.00-1.96)                                  |
| Clashscore            | 141614                   | 1014 (1.98-1.98)                                   |
| Ramachandran outliers | 138981                   | 1006 (1.98-1.98)                                   |
| Sidechain outliers    | 138945                   | 1006 (1.98-1.98)                                   |
| RSRZ outliers         | 127900                   | 11410 (2.00-1.96)                                  |

The table below summarises the geometric issues observed across the polymeric chains and their fit to the electron density. The red, orange, yellow and green segments on the lower bar indicate the fraction of residues that contain outliers for  $\geq 3$ , 2, 1 and 0 types of geometric quality criteria respectively. A grey segment represents the fraction of residues that are not modelled. The numeric value for each fraction is indicated below the corresponding segment, with a dot representing fractions  $\leq 5\%$ . The upper red bar (where present) indicates the fraction of residues that have poor fit to the electron density. The numeric value is given above the bar.

| Mol | Chain | Length | Quality of chain                                                                                                                                                                                                                                                                                                                                                                                                                                                          |
|-----|-------|--------|---------------------------------------------------------------------------------------------------------------------------------------------------------------------------------------------------------------------------------------------------------------------------------------------------------------------------------------------------------------------------------------------------------------------------------------------------------------------------|
| 1   | A     | 257    | <div style="display: flex; align-items: center;"> <div style="width: 5%; height: 10px; background-color: red; margin-right: 5px;"></div> <div style="width: 86%; height: 10px; background-color: green; margin-right: 5px;"></div> <div style="width: 5%; height: 10px; background-color: yellow; margin-right: 5px;"></div> <div style="width: 9%; height: 10px; background-color: grey;"></div> </div> <p style="text-align: center;">5%      86%      5%      9%</p>   |
| 1   | B     | 257    | <div style="display: flex; align-items: center;"> <div style="width: 4%; height: 10px; background-color: red; margin-right: 5px;"></div> <div style="width: 84%; height: 10px; background-color: green; margin-right: 5px;"></div> <div style="width: 5%; height: 10px; background-color: yellow; margin-right: 5px;"></div> <div style="width: 11%; height: 10px; background-color: grey;"></div> </div> <p style="text-align: center;">4%      84%      5%      11%</p> |
| 1   | C     | 257    | <div style="display: flex; align-items: center;"> <div style="width: 5%; height: 10px; background-color: red; margin-right: 5px;"></div> <div style="width: 82%; height: 10px; background-color: green; margin-right: 5px;"></div> <div style="width: 7%; height: 10px; background-color: yellow; margin-right: 5px;"></div> <div style="width: 11%; height: 10px; background-color: grey;"></div> </div> <p style="text-align: center;">5%      82%      7%      11%</p> |
| 1   | D     | 257    | <div style="display: flex; align-items: center;"> <div style="width: 5%; height: 10px; background-color: red; margin-right: 5px;"></div> <div style="width: 76%; height: 10px; background-color: green; margin-right: 5px;"></div> <div style="width: 8%; height: 10px; background-color: yellow; margin-right: 5px;"></div> <div style="width: 15%; height: 10px; background-color: grey;"></div> </div> <p style="text-align: center;">5%      76%      8%      15%</p> |

## 2 Entry composition i

There are 3 unique types of molecules in this entry. The entry contains 7785 atoms, of which 0 are hydrogens and 0 are deuteriums.

In the tables below, the ZeroOcc column contains the number of atoms modelled with zero occupancy, the AltConf column contains the number of residues with at least one atom in alternate conformation and the Trace column contains the number of residues modelled with at most 2 atoms.

- Molecule 1 is a protein called Estrogen Receptor.

| Mol | Chain | Residues | Atoms         |           |          |          |         | ZeroOcc | AltConf | Trace |
|-----|-------|----------|---------------|-----------|----------|----------|---------|---------|---------|-------|
|     |       |          | Total         | C         | N        | O        | S       |         |         |       |
| 1   | A     | 234      | Total<br>1870 | C<br>1198 | N<br>315 | O<br>340 | S<br>17 | 0       | 0       | 0     |
| 1   | B     | 229      | Total<br>1836 | C<br>1177 | N<br>311 | O<br>331 | S<br>17 | 0       | 1       | 0     |
| 1   | C     | 229      | Total<br>1838 | C<br>1178 | N<br>311 | O<br>334 | S<br>15 | 0       | 1       | 0     |
| 1   | D     | 218      | Total<br>1755 | C<br>1127 | N<br>297 | O<br>315 | S<br>16 | 0       | 1       | 0     |

- Molecule 2 is a ligand with the chemical component id LIG but its atom names do not match the existing wwPDB Chemical Component Dictionary definition for LIG. Consequently no firm identification of ligand chemistry can be made. Once the structure is annotated then an identification and diagram will be given here.

| Mol | Chain | Residues | Atoms       |         |        |        |         | ZeroOcc | AltConf |   |
|-----|-------|----------|-------------|---------|--------|--------|---------|---------|---------|---|
|     |       |          | Total       | C       | F      | N      | O       |         |         | S |
| 2   | A     | 1        | Total<br>94 | C<br>70 | F<br>6 | N<br>4 | O<br>12 | S<br>2  | 0       | 1 |
| 2   | B     | 1        | Total<br>47 | C<br>35 | F<br>3 | N<br>2 | O<br>6  | S<br>1  | 0       | 0 |
| 2   | C     | 1        | Total<br>44 | C<br>35 | N<br>2 | O<br>6 | S<br>1  | 0       | 0       |   |
| 2   | D     | 1        | Total<br>47 | C<br>35 | F<br>3 | N<br>2 | O<br>6  | S<br>1  | 0       | 0 |

- Molecule 3 is water.

| Mol | Chain | Residues | Atoms        |          | ZeroOcc | AltConf |
|-----|-------|----------|--------------|----------|---------|---------|
| 3   | S     | 254      | Total<br>254 | O<br>254 | 0       | 0       |

### 3 Residue-property plots [i](#)

These plots are drawn for all protein, RNA, DNA and oligosaccharide chains in the entry. The first graphic for a chain summarises the proportions of the various outlier classes displayed in the second graphic. The second graphic shows the sequence view annotated by issues in geometry and electron density. Residues are color-coded according to the number of geometric quality criteria for which they contain at least one outlier: green = 0, yellow = 1, orange = 2 and red = 3 or more. A red dot above a residue indicates a poor fit to the electron density ( $RSRZ > 2$ ). Stretches of 2 or more consecutive residues without any outlier are shown as a green connector. Residues present in the sample, but not in the model, are shown in grey.

- Molecule 1: Estrogen Receptor

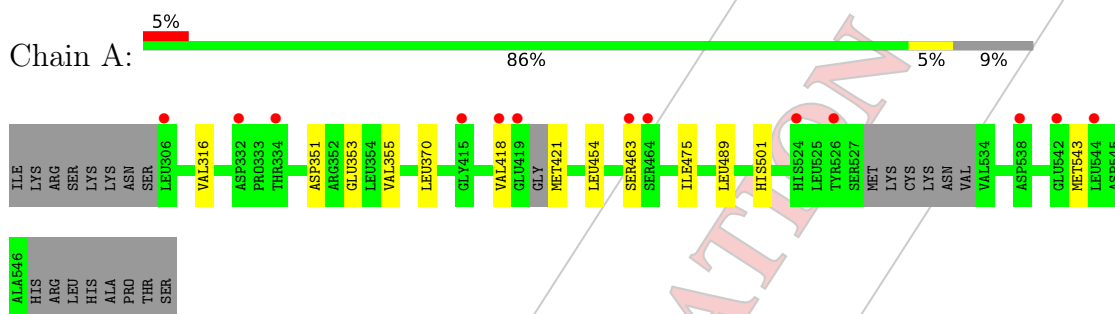

- Molecule 1: Estrogen Receptor

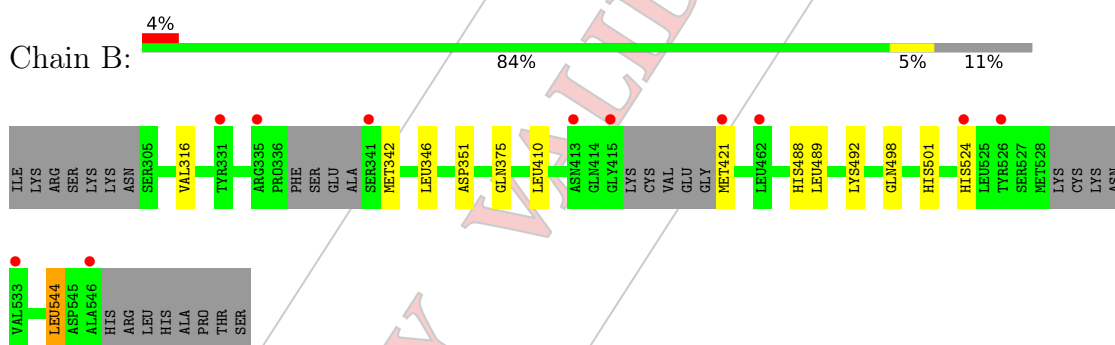

- Molecule 1: Estrogen Receptor

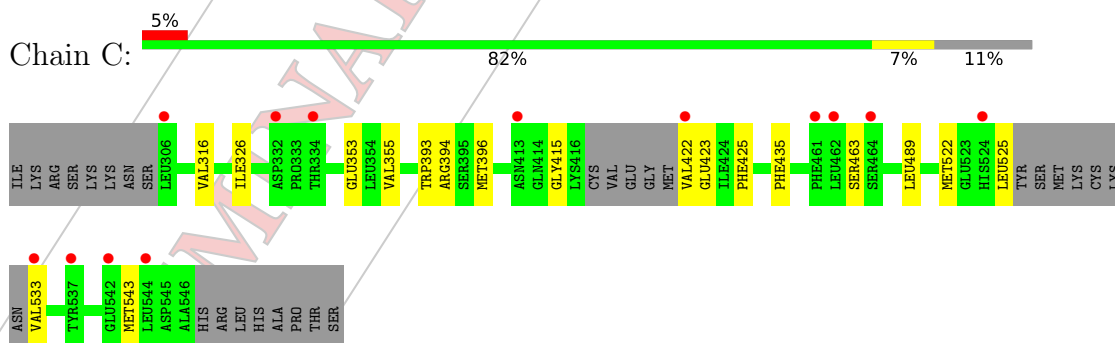

- Molecule 1: Estrogen Receptor

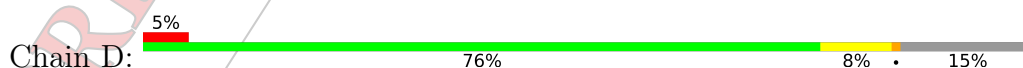

|        |        |
|--------|--------|
| ILE    | GLN498 |
| LYS    | HIS501 |
| ARG    | MET522 |
| SER    | GLI523 |
| LYS    | HIS524 |
| LYS    | LEU525 |
| ASN    | TYR526 |
| SER306 | SER    |
| LEU306 | MET    |
| VAL316 | LYS    |
| TYR331 | CYS    |
| ASP332 | LYS    |
| PRO    | ASN    |
| THR    | VAL533 |
| ARG    | LEU544 |
| PRO    | ASP545 |
| PHE    | ALA546 |
| SER    | HIS    |
| GLU    | ARG    |
| ALA    | LEU    |
| SER341 | HIS    |
| MET342 | ALA    |
| LEU346 | PRO    |
| LEU346 | THR    |
| ASP351 | SER    |
| VAL376 |        |
| LEU410 |        |
| ASP411 |        |
| ARG412 |        |
| ASN413 |        |
| GLM414 |        |
| GLY415 |        |
| LYS    |        |
| CYS    |        |
| VAL    |        |
| GLU    |        |
| GLY    |        |
| MET421 |        |
| ILE424 |        |
| MET427 |        |
| TYR459 |        |
| THR460 |        |
| PHE461 |        |
| LEU    |        |
| SER    |        |
| SER    |        |
| THR    |        |
| LEU    |        |
| LYS467 |        |
| LEU489 |        |

PRELIMINARY VALIDATION REPORT

## 4 Data and refinement statistics i

| Property                                                                | Value                                                       | Source           |
|-------------------------------------------------------------------------|-------------------------------------------------------------|------------------|
| Space group                                                             | P 1                                                         | Depositor        |
| Cell constants<br>a, b, c, $\alpha$ , $\beta$ , $\gamma$                | 53.55Å 58.91Å 93.46Å<br>87.24° 75.18° 62.93°                | Depositor        |
| Resolution (Å)                                                          | 90.06 – 1.97<br>90.06 – 1.83                                | Depositor<br>EDS |
| % Data completeness<br>(in resolution range)                            | 76.7 (90.06-1.97)<br>63.4 (90.06-1.83)                      | Depositor<br>EDS |
| $R_{merge}$                                                             | (Not available)                                             | Depositor        |
| $R_{sym}$                                                               | (Not available)                                             | Depositor        |
| $\langle I/\sigma(I) \rangle$ <sup>1</sup>                              | 1.70 (at 1.83Å)                                             | Xtrriage         |
| Refinement program                                                      | REFMAC 5.8.0258                                             | Depositor        |
| R, $R_{free}$                                                           | 0.202 , 0.235<br>0.211 , 0.244                              | Depositor<br>DCC |
| $R_{free}$ test set                                                     | 2677 reflections (4.92%)                                    | wwPDB-VP         |
| Wilson B-factor (Å <sup>2</sup> )                                       | 26.7                                                        | Xtrriage         |
| Anisotropy                                                              | 0.047                                                       | Xtrriage         |
| Bulk solvent $k_{sol}$ (e/Å <sup>3</sup> ), $B_{sol}$ (Å <sup>2</sup> ) | 0.36 , 46.8                                                 | EDS              |
| L-test for twinning <sup>2</sup>                                        | $\langle  L  \rangle = 0.50$ , $\langle L^2 \rangle = 0.33$ | Xtrriage         |
| Estimated twinning fraction                                             | 0.108 for h,h-k,h-l                                         | Xtrriage         |
| $F_o, F_c$ correlation                                                  | 0.94                                                        | EDS              |
| Total number of atoms                                                   | 7785                                                        | wwPDB-VP         |
| Average B, all atoms (Å <sup>2</sup> )                                  | 40.0                                                        | wwPDB-VP         |

Xtrriage's analysis on translational NCS is as follows: *The largest off-origin peak in the Patterson function is 5.55% of the height of the origin peak. No significant pseudotranslation is detected.*

<sup>1</sup>Intensities estimated from amplitudes.

<sup>2</sup>Theoretical values of  $\langle |L| \rangle$ ,  $\langle L^2 \rangle$  for acentric reflections are 0.5, 0.333 respectively for untwinned datasets, and 0.375, 0.2 for perfectly twinned datasets.

## 5 Model quality [i](#)

### 5.1 Standard geometry [i](#)

Bond lengths and bond angles in the following residue types are not validated in this section: LIG, YCM

The Z score for a bond length (or angle) is the number of standard deviations the observed value is removed from the expected value. A bond length (or angle) with  $|Z| > 5$  is considered an outlier worth inspection. RMSZ is the root-mean-square of all Z scores of the bond lengths (or angles).

| Mol | Chain | Bond lengths |         | Bond angles |         |
|-----|-------|--------------|---------|-------------|---------|
|     |       | RMSZ         | # Z  >5 | RMSZ        | # Z  >5 |
| 1   | A     | 0.30         | 0/1893  | 0.53        | 0/2557  |
| 1   | B     | 0.31         | 0/1861  | 0.55        | 0/2513  |
| 1   | C     | 0.30         | 0/1860  | 0.53        | 0/2513  |
| 1   | D     | 0.30         | 0/1777  | 0.53        | 0/2396  |
| All | All   | 0.30         | 0/7391  | 0.53        | 0/9979  |

There are no bond length outliers.

There are no bond angle outliers.

There are no chirality outliers.

There are no planarity outliers.

### 5.2 Too-close contacts [i](#)

In the following table, the Non-H and H(model) columns list the number of non-hydrogen atoms and hydrogen atoms in the chain respectively. The H(added) column lists the number of hydrogen atoms added and optimized by MolProbity. The Clashes column lists the number of clashes within the asymmetric unit, whereas Symm-Clashes lists symmetry related clashes.

| Mol | Chain | Non-H | H(model) | H(added) | Clashes | Symm-Clashes |
|-----|-------|-------|----------|----------|---------|--------------|
| 1   | A     | 1870  | 0        | 1907     | 10      | 0            |
| 1   | B     | 1836  | 0        | 1878     | 9       | 0            |
| 1   | C     | 1838  | 0        | 1878     | 13      | 0            |
| 1   | D     | 1755  | 0        | 1790     | 14      | 0            |
| 2   | A     | 94    | 0        | 6        | 5       | 0            |
| 2   | B     | 47    | 0        | 3        | 1       | 0            |
| 2   | C     | 44    | 0        | 2        | 2       | 0            |
| 2   | D     | 47    | 0        | 3        | 2       | 0            |
| 3   | S     | 254   | 0        | 0        | 0       | 0            |
| All | All   | 7785  | 0        | 7467     | 48      | 0            |

The all-atom clashscore is defined as the number of clashes found per 1000 atoms (including hydrogen atoms). The all-atom clashscore for this structure is 3.

All (48) close contacts within the same asymmetric unit are listed below, sorted by their clash magnitude.

| Atom-1             | Atom-2             | Interatomic distance (Å) | Clash overlap (Å) |
|--------------------|--------------------|--------------------------|-------------------|
| 1:A:370:LEU:HD11   | 1:A:475:ILE:HD11   | 1.38                     | 1.02              |
| 1:A:501:HIS:CE1    | 1:B:501[B]:HIS:CE1 | 2.65                     | 0.84              |
| 1:C:393:TRP:CE3    | 1:C:396:MET:HE3    | 2.24                     | 0.72              |
| 1:C:326:ILE:HD12   | 1:C:394:ARG:HD3    | 1.74                     | 0.69              |
| 1:A:355:VAL:HA     | 1:A:543:MET:CE     | 2.21                     | 0.69              |
| 1:C:355:VAL:HG22   | 1:C:543:MET:CE     | 2.30                     | 0.62              |
| 1:C:422:VAL:HG12   | 1:C:425:PHE:H      | 1.65                     | 0.61              |
| 2:A:601[A]:LIG:C30 | 2:A:601[A]:LIG:F01 | 2.39                     | 0.60              |
| 2:A:601[A]:LIG:C15 | 2:A:601[A]:LIG:F02 | 2.40                     | 0.60              |
| 1:C:393:TRP:CE3    | 1:C:396:MET:CE     | 2.87                     | 0.58              |
| 1:B:488:HIS:NE2    | 1:B:492:LYS:HD2    | 2.20                     | 0.57              |
| 1:B:498:GLN:HA     | 1:B:501[A]:HIS:CE1 | 2.40                     | 0.56              |
| 1:D:498:GLN:HA     | 1:D:501:HIS:CE1    | 2.41                     | 0.56              |
| 1:A:418:VAL:HG13   | 1:A:421:MET:N      | 2.23                     | 0.53              |
| 1:A:355:VAL:HA     | 1:A:543:MET:HE3    | 1.91                     | 0.52              |
| 1:C:525:LEU:HD11   | 1:C:533:VAL:N      | 2.24                     | 0.52              |
| 1:A:454:LEU:HD22   | 1:A:475:ILE:HD12   | 1.92                     | 0.51              |
| 1:D:413:ASN:O      | 1:D:414:GLN:HB2    | 2.11                     | 0.50              |
| 1:D:376:VAL:HG22   | 1:D:544:LEU:HD12   | 1.92                     | 0.50              |
| 1:A:370:LEU:CD1    | 1:A:475:ILE:HD11   | 2.28                     | 0.49              |
| 1:D:331:TYR:O      | 1:D:332:ASP:C      | 2.51                     | 0.49              |
| 2:A:601[A]:LIG:O06 | 2:A:601[A]:LIG:F01 | 2.21                     | 0.49              |
| 1:B:342:MET:HE3    | 1:B:346:LEU:HD11   | 1.94                     | 0.49              |
| 1:D:424:ILE:HD13   | 1:D:427:MET:CE     | 2.43                     | 0.48              |
| 1:C:415:GLY:O      | 1:C:422:VAL:HG23   | 2.13                     | 0.47              |
| 1:C:525:LEU:HD12   | 2:C:601:LIG:O03    | 2.15                     | 0.47              |
| 1:C:355:VAL:HG22   | 1:C:543:MET:HE2    | 1.97                     | 0.47              |
| 1:D:351:ASP:OD1    | 2:D:601:LIG:N01    | 2.48                     | 0.47              |
| 1:B:316:VAL:HG21   | 1:B:489:LEU:HD21   | 1.97                     | 0.47              |
| 1:A:353:GLU:OE1    | 2:A:601[B]:LIG:O05 | 2.35                     | 0.45              |
| 1:D:316:VAL:HG21   | 1:D:489:LEU:HD21   | 1.99                     | 0.45              |
| 1:D:413:ASN:O      | 1:D:414:GLN:CB     | 2.65                     | 0.44              |
| 1:D:545:ASP:O      | 1:D:546:ALA:HB3    | 2.19                     | 0.43              |
| 1:A:351:ASP:OD1    | 2:A:601[A]:LIG:N01 | 2.52                     | 0.43              |
| 1:D:533:VAL:HG12   | 2:D:601:LIG:C10    | 2.49                     | 0.43              |
| 1:D:342:MET:HE3    | 1:D:346:LEU:HG     | 2.01                     | 0.42              |
| 1:D:342:MET:HE3    | 1:D:346:LEU:HD11   | 2.02                     | 0.42              |

Continued on next page...



Continued from previous page...

| Atom-1           | Atom-2           | Interatomic distance (Å) | Clash overlap (Å) |
|------------------|------------------|--------------------------|-------------------|
| 1:B:342:MET:CE   | 1:B:410:LEU:HD11 | 2.50                     | 0.42              |
| 1:A:316:VAL:HG21 | 1:A:489:LEU:HD21 | 2.02                     | 0.42              |
| 1:C:396:MET:CE   | 1:C:435:PHE:HB3  | 2.50                     | 0.42              |
| 1:C:393:TRP:HE3  | 1:C:396:MET:CE   | 2.33                     | 0.42              |
| 1:C:316:VAL:HG21 | 1:C:489:LEU:HD21 | 2.02                     | 0.41              |
| 1:D:424:ILE:HD13 | 1:D:427:MET:HE2  | 2.02                     | 0.41              |
| 1:C:353:GLU:OE1  | 2:C:601:LIG:O05  | 2.38                     | 0.41              |
| 1:B:375:GLN:HB3  | 1:B:544:LEU:HD21 | 2.02                     | 0.41              |
| 1:B:421:MET:HG2  | 1:B:524:HIS:CD2  | 2.57                     | 0.40              |
| 1:B:351:ASP:OD1  | 2:B:601:LIG:N01  | 2.55                     | 0.40              |
| 1:D:342:MET:CE   | 1:D:410:LEU:HD11 | 2.52                     | 0.40              |

There are no symmetry-related clashes.

## 5.3 Torsion angles [i](#)

### 5.3.1 Protein backbone [i](#)

In the following table, the Percentiles column shows the percent Ramachandran outliers of the chain as a percentile score with respect to all X-ray entries followed by that with respect to entries of similar resolution.

The Analysed column shows the number of residues for which the backbone conformation was analysed, and the total number of residues.

| Mol | Chain | Analysed       | Favoured  | Allowed | Outliers | Percentiles |     |
|-----|-------|----------------|-----------|---------|----------|-------------|-----|
| 1   | A     | 227/257 (88%)  | 222 (98%) | 4 (2%)  | 1 (0%)   | 34          | 22  |
| 1   | B     | 221/257 (86%)  | 217 (98%) | 4 (2%)  | 0        | 100         | 100 |
| 1   | C     | 223/257 (87%)  | 221 (99%) | 1 (0%)  | 1 (0%)   | 34          | 22  |
| 1   | D     | 208/257 (81%)  | 204 (98%) | 2 (1%)  | 2 (1%)   | 15          | 6   |
| All | All   | 879/1028 (86%) | 864 (98%) | 11 (1%) | 4 (0%)   | 29          | 16  |

All (4) Ramachandran outliers are listed below:

| Mol | Chain | Res | Type |
|-----|-------|-----|------|
| 1   | A     | 463 | SER  |
| 1   | C     | 463 | SER  |
| 1   | D     | 545 | ASP  |
| 1   | D     | 414 | GLN  |

### 5.3.2 Protein sidechains [i](#)

In the following table, the Percentiles column shows the percent sidechain outliers of the chain as a percentile score with respect to all X-ray entries followed by that with respect to entries of similar resolution.

The Analysed column shows the number of residues for which the sidechain conformation was analysed, and the total number of residues.

| Mol | Chain | Analysed      | Rotameric  | Outliers | Percentiles |     |
|-----|-------|---------------|------------|----------|-------------|-----|
| 1   | A     | 210/232 (90%) | 210 (100%) | 0        | 100         | 100 |
| 1   | B     | 207/232 (89%) | 206 (100%) | 1 (0%)   | 88          | 87  |
| 1   | C     | 206/232 (89%) | 204 (99%)  | 2 (1%)   | 76          | 73  |
| 1   | D     | 196/232 (84%) | 191 (97%)  | 5 (3%)   | 46          | 37  |
| All | All   | 819/928 (88%) | 811 (99%)  | 8 (1%)   | 76          | 73  |

All (8) residues with a non-rotameric sidechain are listed below:

| Mol | Chain | Res | Type |
|-----|-------|-----|------|
| 1   | B     | 544 | LEU  |
| 1   | C     | 423 | GLU  |
| 1   | C     | 522 | MET  |
| 1   | D     | 306 | LEU  |
| 1   | D     | 331 | TYR  |
| 1   | D     | 412 | ARG  |
| 1   | D     | 421 | MET  |
| 1   | D     | 522 | MET  |

Some sidechains can be flipped to improve hydrogen bonding and reduce clashes. All (6) such sidechains are listed below:

| Mol | Chain | Res | Type |
|-----|-------|-----|------|
| 1   | A     | 356 | HIS  |
| 1   | A     | 501 | HIS  |
| 1   | C     | 519 | ASN  |
| 1   | C     | 524 | HIS  |
| 1   | D     | 439 | ASN  |
| 1   | D     | 519 | ASN  |

### 5.3.3 RNA [i](#)

There are no RNA molecules in this entry.

## 5.4 Non-standard residues in protein, DNA, RNA chains [i](#)

There are no non-standard protein/DNA/RNA residues in this entry.

## 5.5 Carbohydrates [i](#)

There are no monosaccharides in this entry.

## 5.6 Ligand geometry [i](#)

Of 5 ligands modelled in this entry, 5 could not be matched to an existing wwPDB Chemical Component Dictionary definition at this stage - leaving 0 for Mogul analysis.

There are no bond length outliers.

There are no bond angle outliers.

There are no chirality outliers.

There are no torsion outliers.

There are no ring outliers.

No monomer is involved in short contacts.

The following is a two-dimensional graphical depiction of Mogul quality analysis of bond lengths, bond angles, torsion angles, and ring geometry for all instances of the Ligand of Interest. In addition, ligands with molecular weight > 250 and outliers as shown on the validation Tables will also be included. For torsion angles, if less than 5% of the Mogul distribution of torsion angles is within 10 degrees of the torsion angle in question, then that torsion angle is considered an outlier. Any bond that is central to one or more torsion angles identified as an outlier by Mogul will be highlighted in the graph. For rings, the root-mean-square deviation (RMSD) between the ring in question and similar rings identified by Mogul is calculated over all ring torsion angles. If the average RMSD is greater than 60 degrees and the minimal RMSD between the ring in question and any Mogul-identified rings is also greater than 60 degrees, then that ring is considered an outlier. The outliers are highlighted in purple. The color gray indicates Mogul did not find sufficient equivalents in the CSD to analyse the geometry.

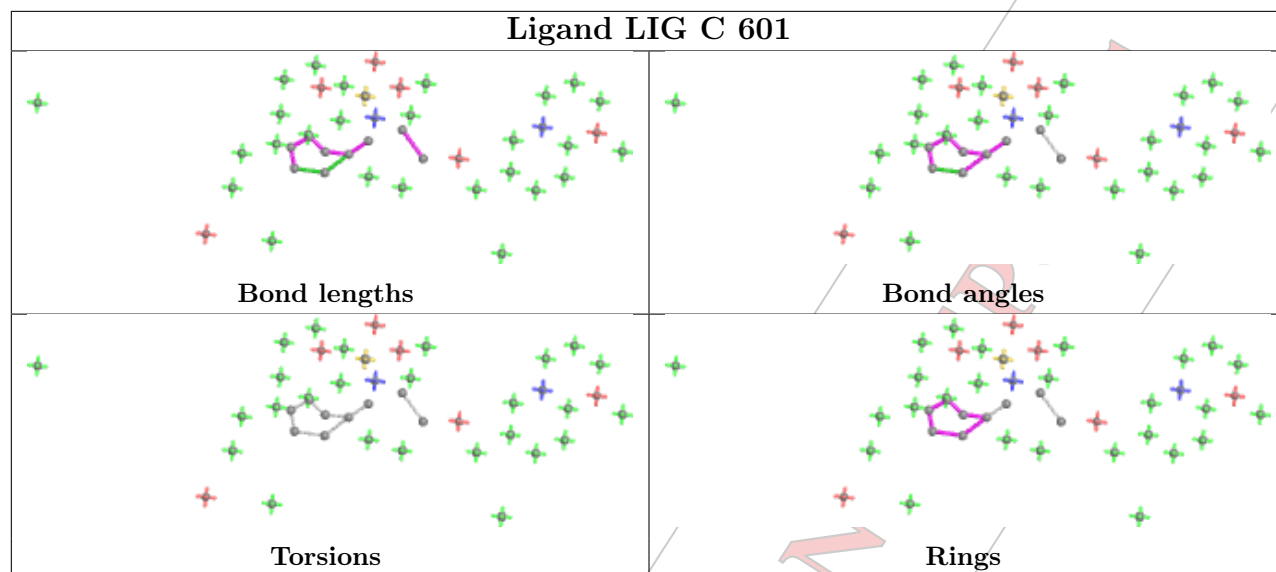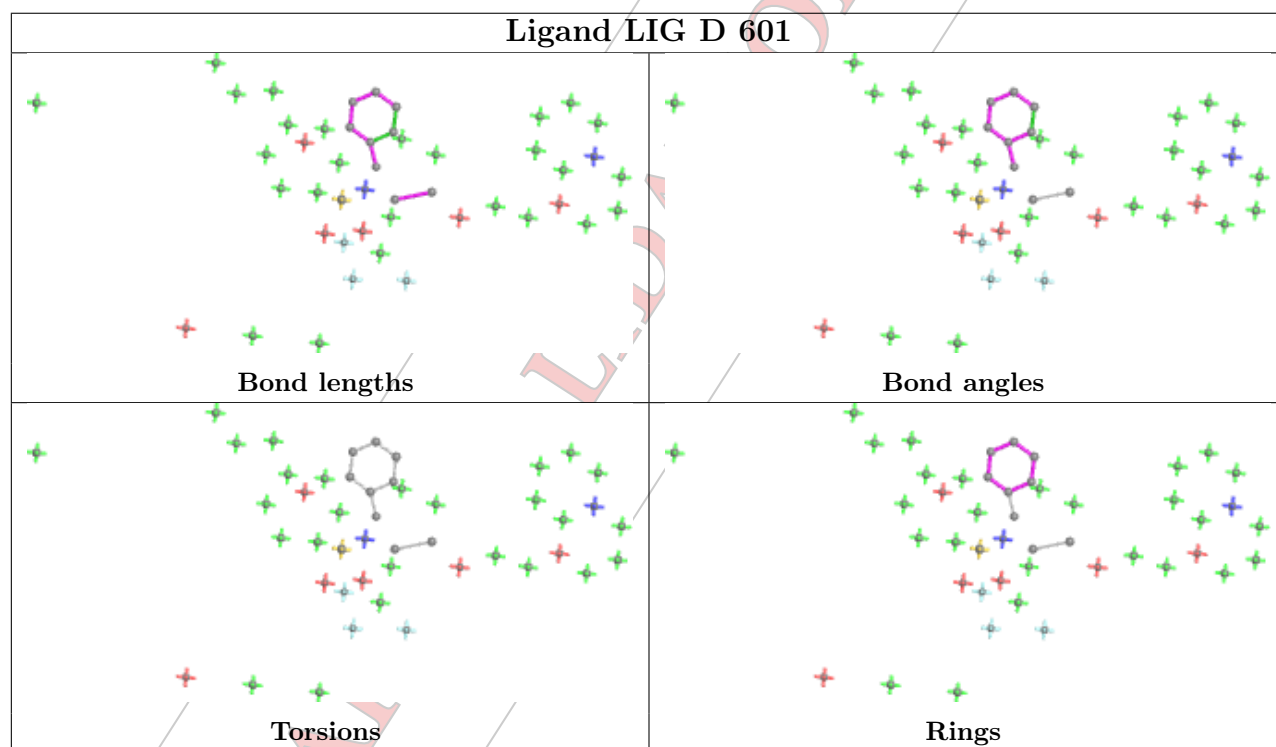

PRELIMINARY

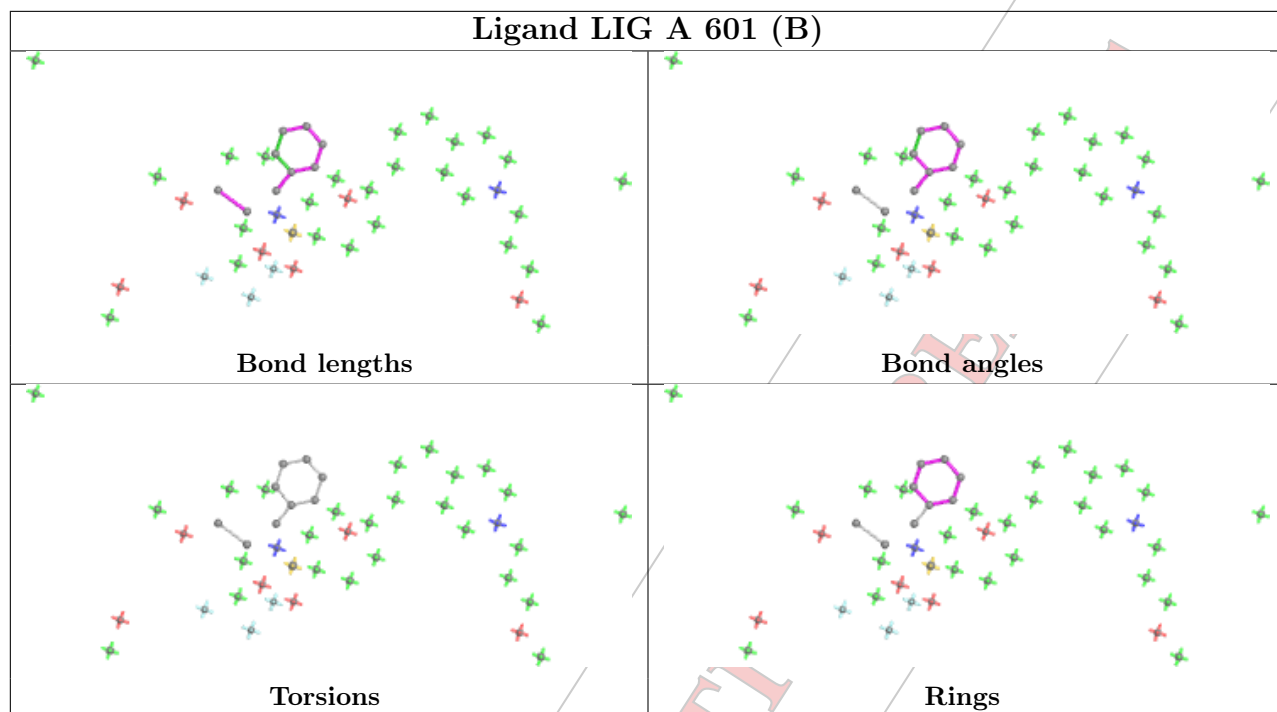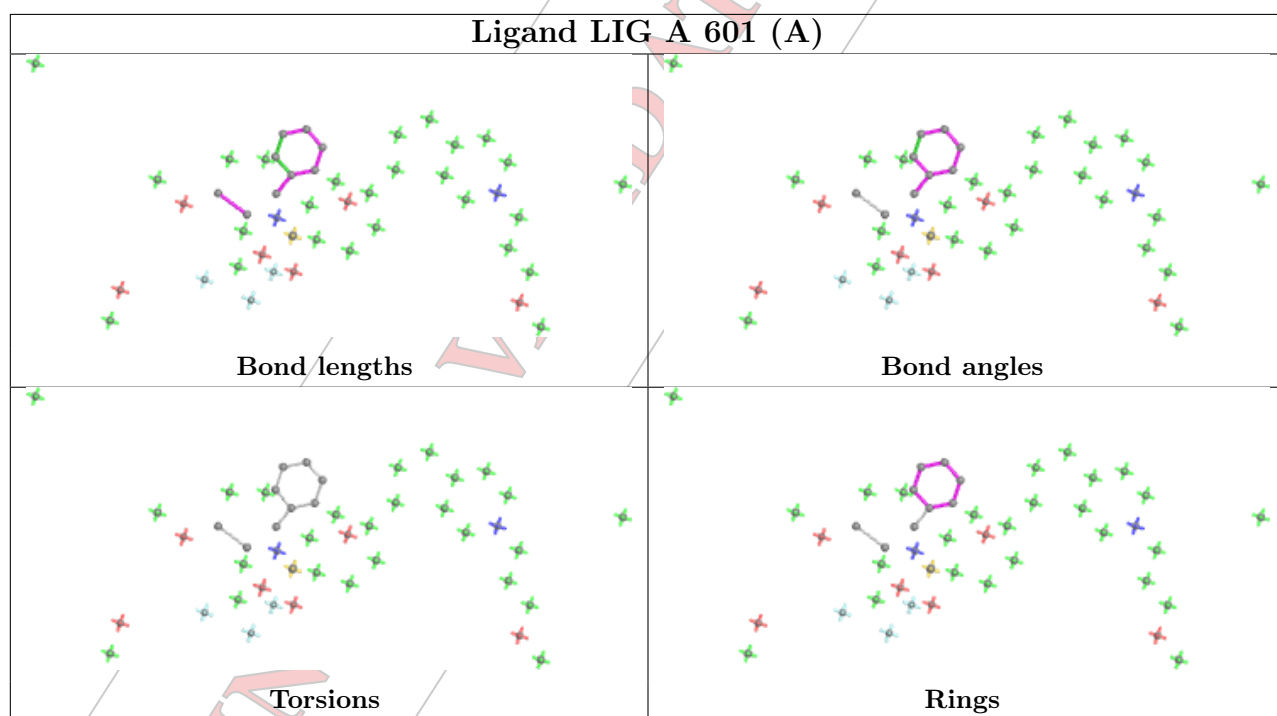

PRELIMINARY

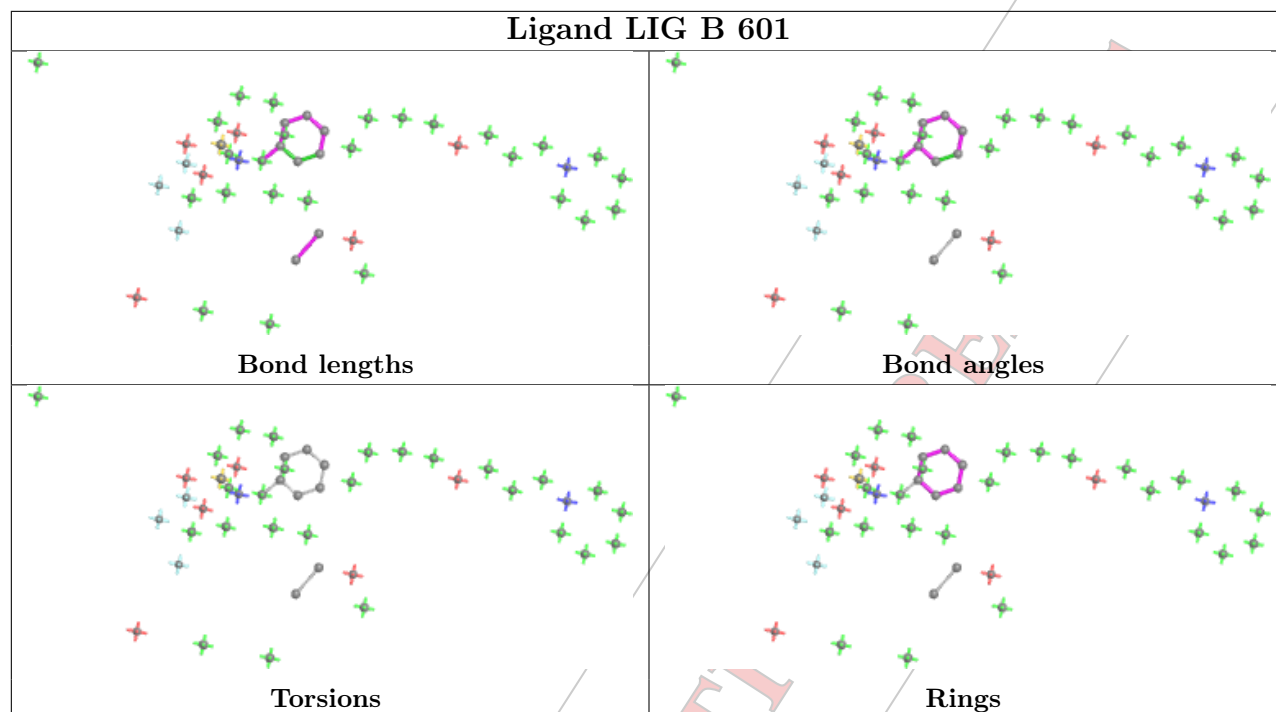

## 5.7 Other polymers [\(i\)](#)

There are no such residues in this entry.

## 5.8 Polymer linkage issues [\(i\)](#)

There are no chain breaks in this entry.

## 6 Fit of model and data i

### 6.1 Protein, DNA and RNA chains i

In the following table, the column labelled '#RSRZ > 2' contains the number (and percentage) of RSRZ outliers, followed by percent RSRZ outliers for the chain as percentile scores relative to all X-ray entries and entries of similar resolution. The OWAB column contains the minimum, median, 95<sup>th</sup> percentile and maximum values of the occupancy-weighted average B-factor per residue. The column labelled 'Q < 0.9' lists the number of (and percentage) of residues with an average occupancy less than 0.9.

| Mol | Chain | Analysed       | <RSRZ> | #RSRZ>2       | OWAB(Å <sup>2</sup> ) | Q<0.9 |
|-----|-------|----------------|--------|---------------|-----------------------|-------|
| 1   | A     | 233/257 (90%)  | 0.40   | 13 (5%) 24 26 | 18, 39, 82, 132       | 0     |
| 1   | B     | 228/257 (88%)  | 0.25   | 11 (4%) 30 32 | 18, 33, 81, 106       | 0     |
| 1   | C     | 228/257 (88%)  | 0.28   | 13 (5%) 23 25 | 17, 34, 68, 101       | 0     |
| 1   | D     | 217/257 (84%)  | 0.26   | 12 (5%) 25 27 | 18, 33, 82, 118       | 0     |
| All | All   | 906/1028 (88%) | 0.30   | 49 (5%) 25 28 | 17, 35, 79, 132       | 0     |

All (49) RSRZ outliers are listed below:

| Mol | Chain | Res | Type | RSRZ |
|-----|-------|-----|------|------|
| 1   | A     | 419 | GLU  | 10.5 |
| 1   | A     | 418 | VAL  | 8.6  |
| 1   | C     | 462 | LEU  | 4.3  |
| 1   | B     | 331 | TYR  | 4.3  |
| 1   | A     | 463 | SER  | 4.0  |
| 1   | A     | 526 | TYR  | 3.9  |
| 1   | A     | 464 | SER  | 3.8  |
| 1   | D     | 332 | ASP  | 3.7  |
| 1   | A     | 306 | LEU  | 3.6  |
| 1   | D     | 413 | ASN  | 3.5  |
| 1   | B     | 415 | GLY  | 3.2  |
| 1   | C     | 537 | TYR  | 3.1  |
| 1   | D     | 546 | ALA  | 3.1  |
| 1   | A     | 334 | THR  | 3.1  |
| 1   | D     | 461 | PHE  | 3.1  |
| 1   | C     | 524 | HIS  | 3.1  |
| 1   | B     | 526 | TYR  | 3.0  |
| 1   | D     | 459 | TYR  | 2.9  |
| 1   | D     | 306 | LEU  | 2.9  |
| 1   | D     | 526 | TYR  | 2.9  |
| 1   | A     | 544 | LEU  | 2.9  |

*Continued on next page...*

Continued from previous page...

| Mol | Chain | Res | Type | RSRZ |
|-----|-------|-----|------|------|
| 1   | B     | 533 | VAL  | 2.8  |
| 1   | D     | 467 | LYS  | 2.8  |
| 1   | B     | 413 | ASN  | 2.7  |
| 1   | B     | 524 | HIS  | 2.7  |
| 1   | A     | 415 | GLY  | 2.6  |
| 1   | B     | 341 | SER  | 2.6  |
| 1   | C     | 413 | ASN  | 2.6  |
| 1   | B     | 335 | ARG  | 2.6  |
| 1   | B     | 462 | LEU  | 2.5  |
| 1   | D     | 524 | HIS  | 2.5  |
| 1   | C     | 464 | SER  | 2.4  |
| 1   | B     | 546 | ALA  | 2.4  |
| 1   | C     | 542 | GLU  | 2.4  |
| 1   | A     | 538 | ASP  | 2.3  |
| 1   | C     | 544 | LEU  | 2.3  |
| 1   | C     | 306 | LEU  | 2.2  |
| 1   | A     | 332 | ASP  | 2.2  |
| 1   | D     | 414 | GLN  | 2.2  |
| 1   | C     | 533 | VAL  | 2.1  |
| 1   | C     | 332 | ASP  | 2.1  |
| 1   | A     | 524 | HIS  | 2.1  |
| 1   | D     | 331 | TYR  | 2.1  |
| 1   | C     | 461 | PHE  | 2.1  |
| 1   | C     | 334 | THR  | 2.1  |
| 1   | D     | 342 | MET  | 2.1  |
| 1   | C     | 422 | VAL  | 2.0  |
| 1   | A     | 542 | GLU  | 2.0  |
| 1   | B     | 421 | MET  | 2.0  |

## 6.2 Non-standard residues in protein, DNA, RNA chains [i](#)

There are no non-standard protein/DNA/RNA residues in this entry.

## 6.3 Carbohydrates [i](#)

There are no monosaccharides in this entry.

## 6.4 Ligands [i](#)

In the following table, the Atoms column lists the number of modelled atoms in the group and the number defined in the chemical component dictionary. The B-factors column lists the minimum,



median, 95<sup>th</sup> percentile and maximum values of B factors of atoms in the group. The column labelled 'Q< 0.9' lists the number of atoms with occupancy less than 0.9.

| Mol | Type | Chain | Res    | Atoms | RSCC | RSR  | B-factors(Å <sup>2</sup> ) | Q<0.9 |
|-----|------|-------|--------|-------|------|------|----------------------------|-------|
| 2   | LIG  | D     | 601    | 47/?  | 0.92 | 0.13 | 21,40,78,108               | 0     |
| 2   | LIG  | A     | 601[B] | 47/?  | 0.92 | 0.17 | 16,28,44,62                | 47    |
| 2   | LIG  | A     | 601[A] | 47/?  | 0.92 | 0.17 | 22,35,62,79                | 47    |
| 2   | LIG  | B     | 601    | 47/?  | 0.92 | 0.14 | 21,36,74,86                | 0     |
| 2   | LIG  | C     | 601    | 44/?  | 0.94 | 0.13 | 17,34,71,81                | 0     |

The following is a graphical depiction of the model fit to experimental electron density of all instances of the Ligand of Interest. In addition, ligands with molecular weight > 250 and outliers as shown on the geometry validation Tables will also be included. Each fit is shown from different orientation to approximate a three-dimensional view.

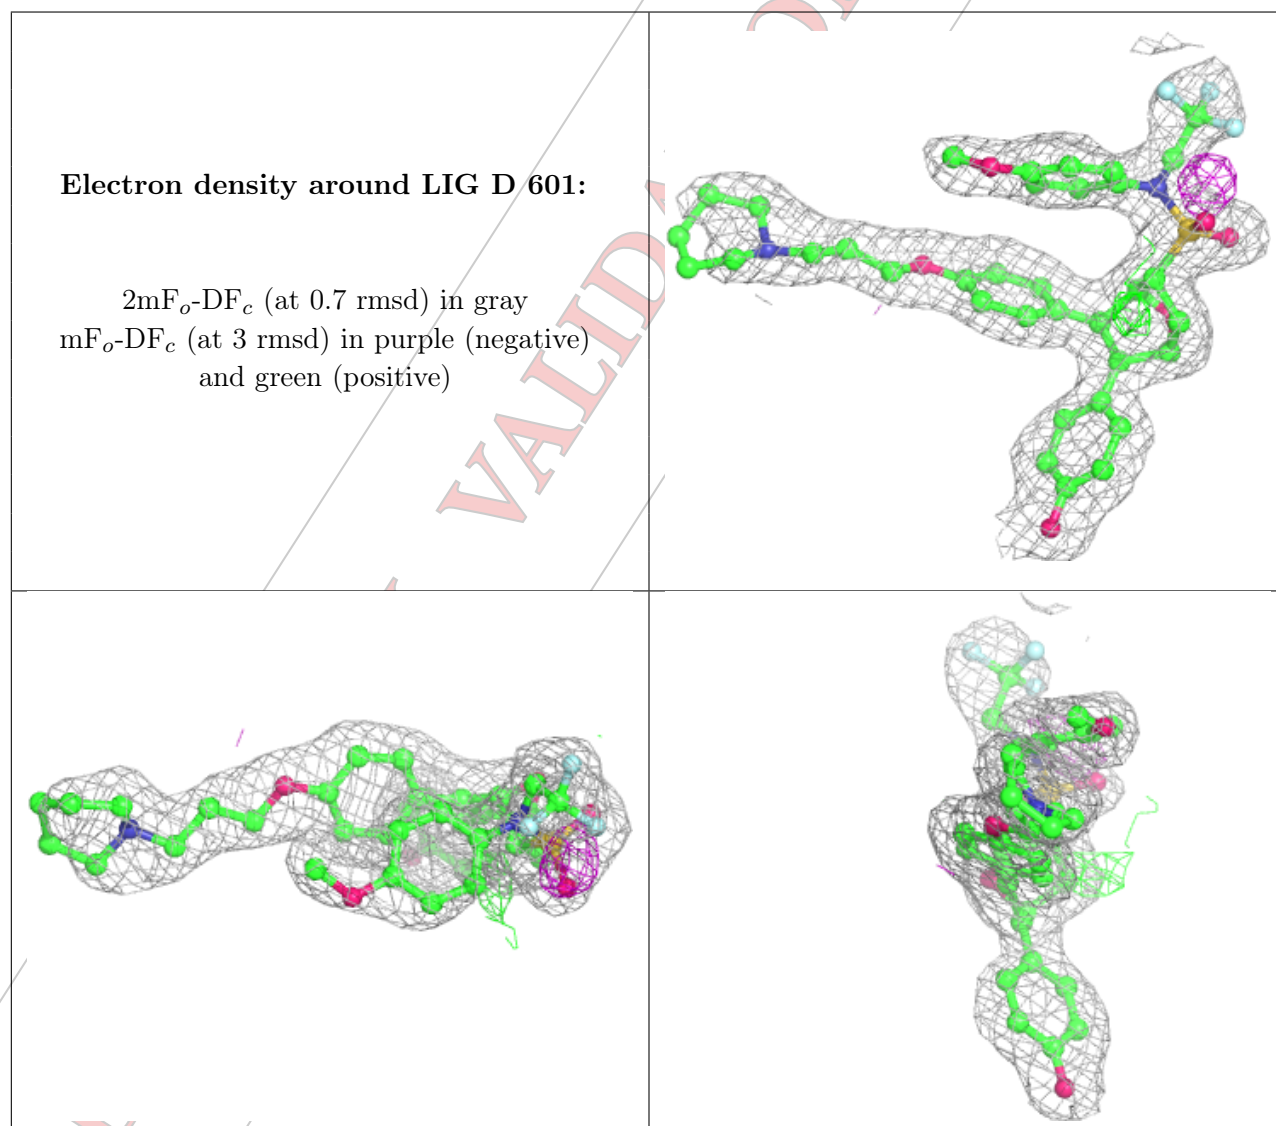

**Electron density around LIG A 601 (B):**

$2mF_o-DF_c$  (at 0.7 rmsd) in gray  
 $mF_o-DF_c$  (at 3 rmsd) in purple (negative)  
and green (positive)

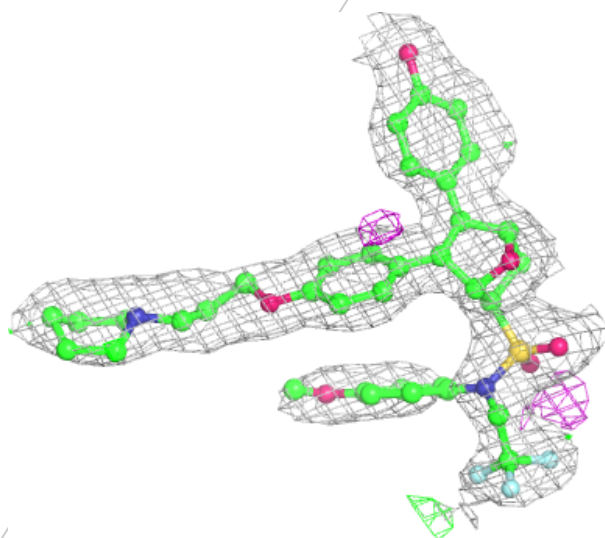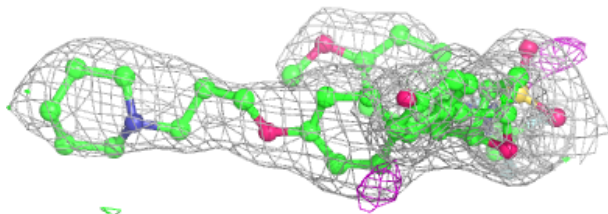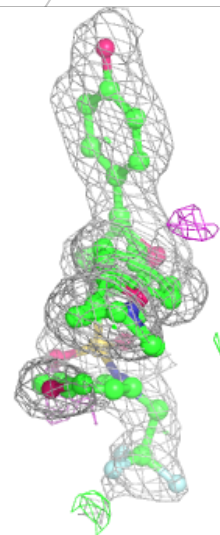

PRELIMINARY

**Electron density around LIG A 601 (A):**

$2mF_o-DF_c$  (at 0.7 rmsd) in gray  
 $mF_o-DF_c$  (at 3 rmsd) in purple (negative)  
and green (positive)

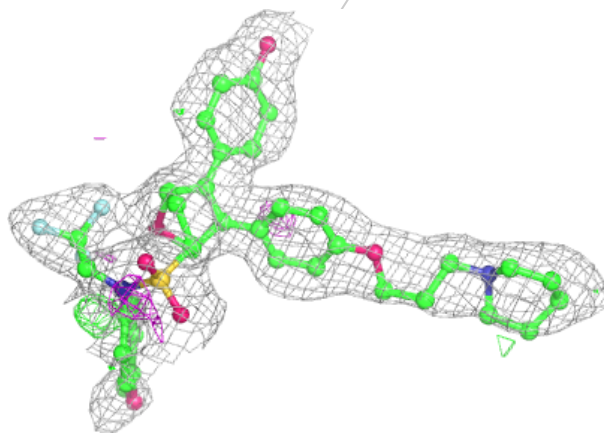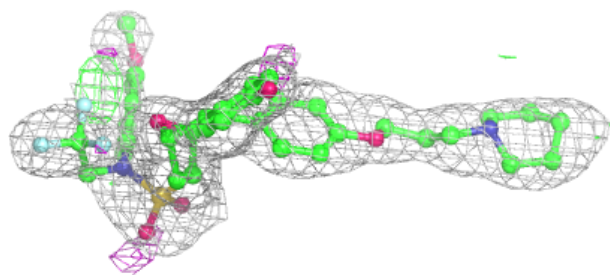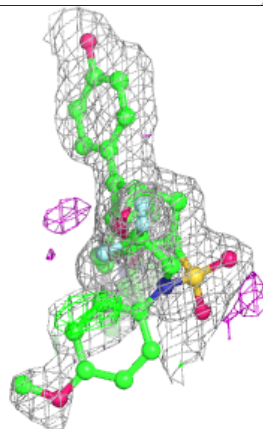

PRELIMINARY VALIDATION

**Electron density around LIG B 601:**

$2mF_o-DF_c$  (at 0.7 rmsd) in gray  
 $mF_o-DF_c$  (at 3 rmsd) in purple (negative)  
and green (positive)

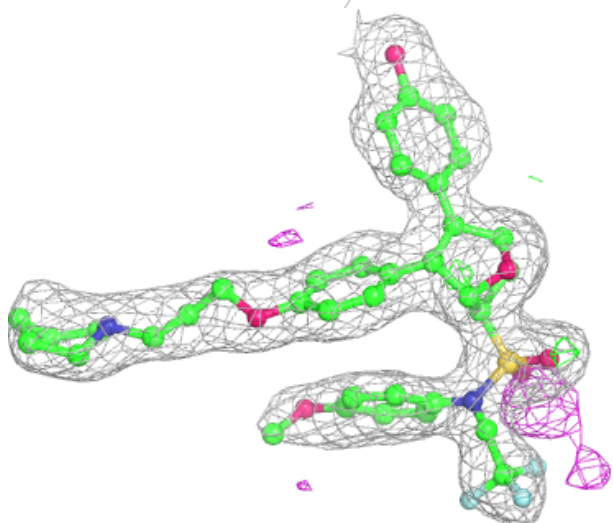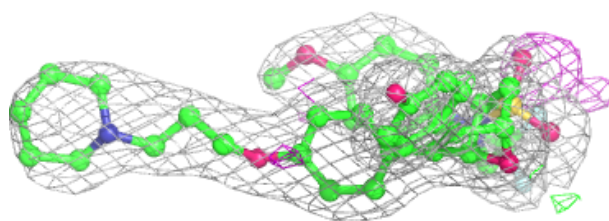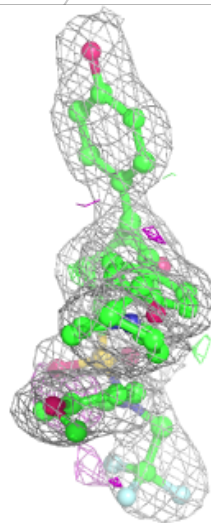

PRELIMINARY

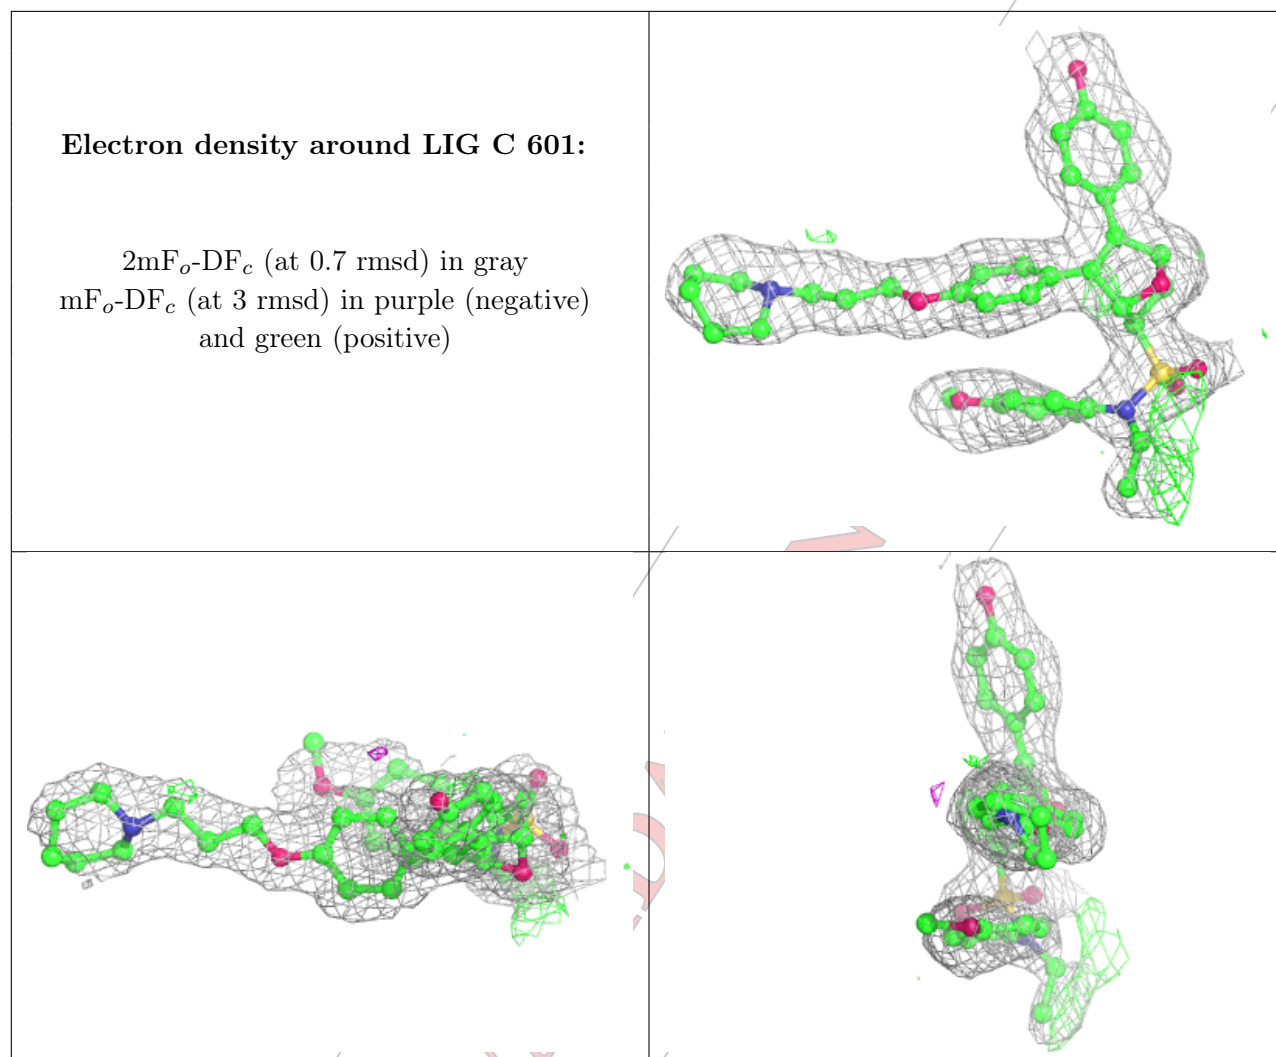

## 6.5 Other polymers [i](#)

There are no such residues in this entry.

PRELIMINARY



# Preliminary Full wwPDB X-ray Structure Validation Report ⓘ

Aug 9, 2020 – 09:51 PM EDT

Deposition ID : D\_1000251196

This is a Preliminary Full wwPDB X-ray Structure Validation Report.

This report is produced by the wwPDB Deposition System during initial deposition but before annotation of the structure.

We welcome your comments at [validation@mail.wwpdb.org](mailto:validation@mail.wwpdb.org)

A user guide is available at

<https://www.wwpdb.org/validation/2017/XrayValidationReportHelp>

with specific help available everywhere you see the ⓘ symbol.

---

The following versions of software and data (see [references ⓘ](#)) were used in the production of this report:

|                                |   |                                                                    |
|--------------------------------|---|--------------------------------------------------------------------|
| MolProbity                     | : | 4.02b-467                                                          |
| Mogul                          | : | 1.8.5 (274361), CSD as541be (2020)                                 |
| Xtriage (Phenix)               | : | 1.13                                                               |
| EDS                            | : | 2.13.1                                                             |
| buster-report                  | : | 1.1.7 (2018)                                                       |
| Percentile statistics          | : | 20191225.v01 (using entries in the PDB archive December 25th 2019) |
| Refmac                         | : | 5.8.0158                                                           |
| CCP4                           | : | 7.0.044 (Gargrove)                                                 |
| Ideal geometry (proteins)      | : | Engh & Huber (2001)                                                |
| Ideal geometry (DNA, RNA)      | : | Parkinson et al. (1996)                                            |
| Validation Pipeline (wwPDB-VP) | : | 2.13.1                                                             |

# 1 Overall quality at a glance i

The following experimental techniques were used to determine the structure:  
*X-RAY DIFFRACTION*

The reported resolution of this entry is 1.67 Å.

Percentile scores (ranging between 0-100) for global validation metrics of the entry are shown in the following graphic. The table shows the number of entries on which the scores are based.

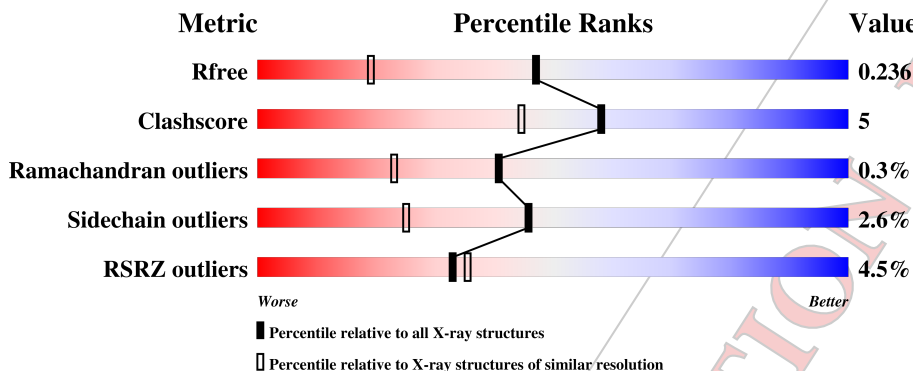

| Metric                | Whole archive<br>(#Entries) | Similar resolution<br>(#Entries, resolution range(Å)) |
|-----------------------|-----------------------------|-------------------------------------------------------|
| $R_{free}$            | 130704                      | 6780 (1.70-1.66)                                      |
| Clashscore            | 141614                      | 7310 (1.70-1.66)                                      |
| Ramachandran outliers | 138981                      | 7173 (1.70-1.66)                                      |
| Sidechain outliers    | 138945                      | 7172 (1.70-1.66)                                      |
| RSRZ outliers         | 127900                      | 6661 (1.70-1.66)                                      |

The table below summarises the geometric issues observed across the polymeric chains and their fit to the electron density. The red, orange, yellow and green segments on the lower bar indicate the fraction of residues that contain outliers for  $\geq 3$ , 2, 1 and 0 types of geometric quality criteria respectively. A grey segment represents the fraction of residues that are not modelled. The numeric value for each fraction is indicated below the corresponding segment, with a dot representing fractions  $\leq 5\%$ . The upper red bar (where present) indicates the fraction of residues that have poor fit to the electron density. The numeric value is given above the bar.

| Mol | Chain | Length | Quality of chain                                                                                                                                                                                                                                                                                                                                                                                                                                                                                     |
|-----|-------|--------|------------------------------------------------------------------------------------------------------------------------------------------------------------------------------------------------------------------------------------------------------------------------------------------------------------------------------------------------------------------------------------------------------------------------------------------------------------------------------------------------------|
| 1   | A     | 257    | <div style="display: flex; align-items: center;"> <div style="width: 7%; height: 10px; background-color: red; margin-right: 5px;"></div> <div style="width: 81%; height: 10px; background-color: green; margin-right: 5px;"></div> <div style="width: 11%; height: 10px; background-color: yellow; margin-right: 5px;"></div> <div style="width: 6%; height: 10px; background-color: orange; margin-right: 5px;"></div> <div style="width: 15%; height: 10px; background-color: grey;"></div> </div> |
| 1   | B     | 257    | <div style="display: flex; align-items: center;"> <div style="width: 2%; height: 10px; background-color: red; margin-right: 5px;"></div> <div style="width: 77%; height: 10px; background-color: green; margin-right: 5px;"></div> <div style="width: 9%; height: 10px; background-color: yellow; margin-right: 5px;"></div> <div style="width: 14%; height: 10px; background-color: grey;"></div> </div>                                                                                            |
| 1   | C     | 257    | <div style="display: flex; align-items: center;"> <div style="width: 5%; height: 10px; background-color: red; margin-right: 5px;"></div> <div style="width: 84%; height: 10px; background-color: green; margin-right: 5px;"></div> <div style="width: 7%; height: 10px; background-color: yellow; margin-right: 5px;"></div> <div style="width: 8%; height: 10px; background-color: orange; margin-right: 5px;"></div> <div style="width: 16%; height: 10px; background-color: grey;"></div> </div>  |
| 1   | D     | 257    | <div style="display: flex; align-items: center;"> <div style="width: 2%; height: 10px; background-color: red; margin-right: 5px;"></div> <div style="width: 77%; height: 10px; background-color: green; margin-right: 5px;"></div> <div style="width: 5%; height: 10px; background-color: yellow; margin-right: 5px;"></div> <div style="width: 18%; height: 10px; background-color: grey;"></div> </div>                                                                                            |

The following table lists non-polymeric compounds, carbohydrate monomers and non-standard

residues in protein, DNA, RNA chains that are outliers for geometric or electron-density-fit criteria:

| Mol | Type | Chain | Res | Chirality | Geometry | Clashes | Electron density |
|-----|------|-------|-----|-----------|----------|---------|------------------|
| 2   | LIG  | A     | 601 | -         | -        | X       | -                |
| 2   | LIG  | B     | 601 | -         | -        | X       | -                |
| 2   | LIG  | C     | 601 | -         | -        | X       | -                |

PRELIMINARY VALIDATION REPORT



## 2 Entry composition i

There are 3 unique types of molecules in this entry. The entry contains 7689 atoms, of which 0 are hydrogens and 0 are deuteriums.

In the tables below, the ZeroOcc column contains the number of atoms modelled with zero occupancy, the AltConf column contains the number of residues with at least one atom in alternate conformation and the Trace column contains the number of residues modelled with at most 2 atoms.

- Molecule 1 is a protein called Estrogen Receptor.

| Mol | Chain | Residues | Atoms |      |     |     |    | ZeroOcc | AltConf | Trace |
|-----|-------|----------|-------|------|-----|-----|----|---------|---------|-------|
|     |       |          | Total | C    | N   | O   | S  |         |         |       |
| 1   | A     | 242      | Total | C    | N   | O   | S  | 0       | 1       | 0     |
|     |       |          | 1937  | 1237 | 327 | 354 | 19 |         |         |       |
| 1   | B     | 221      | Total | C    | N   | O   | S  | 0       | 0       | 0     |
|     |       |          | 1755  | 1123 | 299 | 316 | 17 |         |         |       |
| 1   | C     | 236      | Total | C    | N   | O   | S  | 0       | 1       | 0     |
|     |       |          | 1890  | 1208 | 318 | 347 | 17 |         |         |       |
| 1   | D     | 210      | Total | C    | N   | O   | S  | 0       | 0       | 0     |
|     |       |          | 1678  | 1076 | 286 | 301 | 15 |         |         |       |

- Molecule 2 is a ligand with the chemical component id LIG but its atom names do not match the existing wwPDB Chemical Component Dictionary definition for LIG. Consequently no firm identification of ligand chemistry can be made. Once the structure is annotated then an identification and diagram will be given here.

| Mol | Chain | Residues | Atoms |    |   |   |   | ZeroOcc | AltConf |   |
|-----|-------|----------|-------|----|---|---|---|---------|---------|---|
|     |       |          | Total | C  | N | O | S |         |         |   |
| 2   | A     | 1        | Total | C  | N | O | S | 0       | 0       |   |
|     |       |          | 26    | 19 | 1 | 5 | 1 |         |         |   |
| 2   | B     | 1        | Total | C  | F | N | O | S       | 0       | 0 |
|     |       |          | 34    | 24 | 3 | 1 | 5 | 1       |         |   |
| 2   | C     | 1        | Total | C  | N | O | S | 0       | 0       |   |
|     |       |          | 28    | 21 | 1 | 5 | 1 |         |         |   |
| 2   | D     | 1        | Total | C  | F | N | O | S       | 0       | 0 |
|     |       |          | 33    | 23 | 3 | 1 | 5 | 1       |         |   |

- Molecule 3 is water.

| Mol | Chain | Residues | Atoms | ZeroOcc | AltConf |   |
|-----|-------|----------|-------|---------|---------|---|
| 3   | S     | 308      | Total | O       | 0       | 0 |
|     |       |          | 308   | 308     |         |   |

### 3 Residue-property plots [\(i\)](#)

These plots are drawn for all protein, RNA, DNA and oligosaccharide chains in the entry. The first graphic for a chain summarises the proportions of the various outlier classes displayed in the second graphic. The second graphic shows the sequence view annotated by issues in geometry and electron density. Residues are color-coded according to the number of geometric quality criteria for which they contain at least one outlier: green = 0, yellow = 1, orange = 2 and red = 3 or more. A red dot above a residue indicates a poor fit to the electron density ( $RSRZ > 2$ ). Stretches of 2 or more consecutive residues without any outlier are shown as a green connector. Residues present in the sample, but not in the model, are shown in grey.

- Molecule 1: Estrogen Receptor

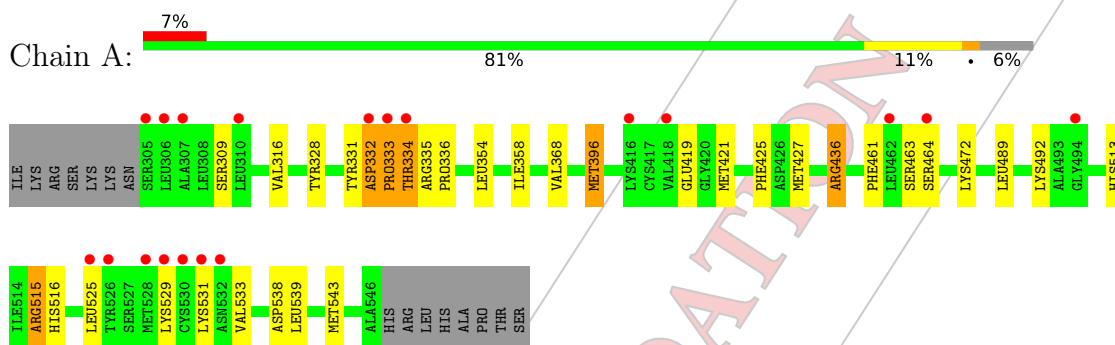

- Molecule 1: Estrogen Receptor

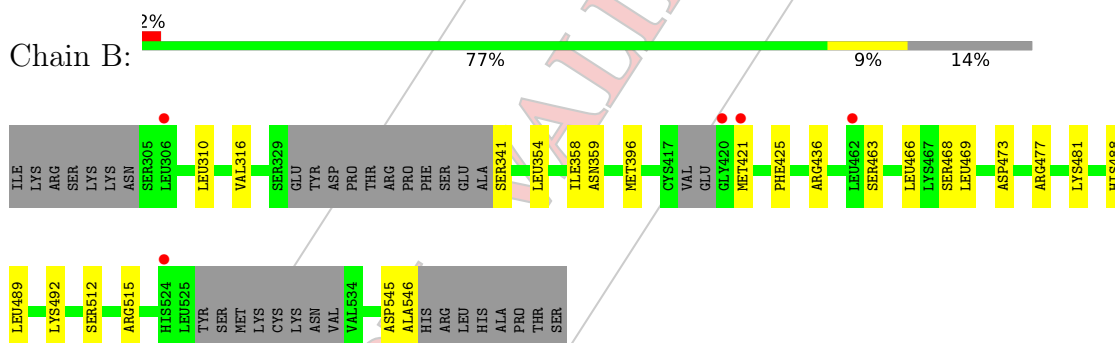

- Molecule 1: Estrogen Receptor

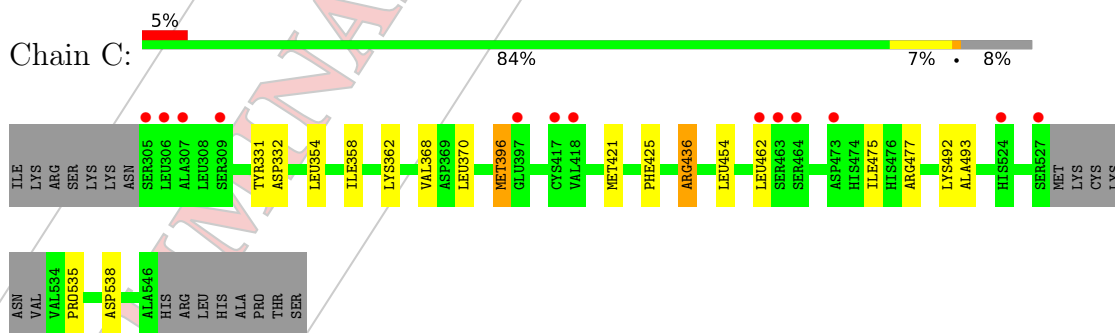

- Molecule 1: Estrogen Receptor

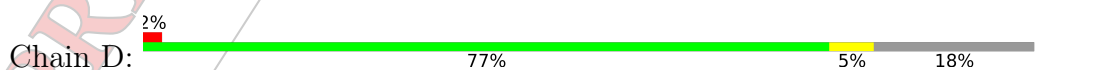

|     |     |     |     |     |     |     |        |        |        |        |     |     |     |     |     |     |     |     |     |     |     |        |        |        |        |        |     |     |     |     |     |     |        |        |        |     |     |     |     |     |     |     |        |        |        |        |        |        |     |     |     |     |     |     |     |     |        |        |        |        |     |     |     |     |     |     |     |     |
|-----|-----|-----|-----|-----|-----|-----|--------|--------|--------|--------|-----|-----|-----|-----|-----|-----|-----|-----|-----|-----|-----|--------|--------|--------|--------|--------|-----|-----|-----|-----|-----|-----|--------|--------|--------|-----|-----|-----|-----|-----|-----|-----|--------|--------|--------|--------|--------|--------|-----|-----|-----|-----|-----|-----|-----|-----|--------|--------|--------|--------|-----|-----|-----|-----|-----|-----|-----|-----|
| ILE | LYS | ARG | SER | LYS | LYS | ASN | SER306 | LEU306 | VAL316 | SER329 | GLU | TYR | ASP | PRO | THR | ARG | PRO | PHE | SER | GLU | ALA | SER341 | GLU353 | VAL376 | MET396 | GLY415 | LYS | CYS | VAL | GLU | GLY | MET | VAL422 | ALA430 | PHE461 | LEU | SER | SER | THR | LEU | LYS | SER | LEU469 | ASP473 | LEU489 | GLN498 | HIS501 | LEU526 | TYR | SER | MET | LYS | CYS | LYS | ASN | VAL | VAL534 | LEU544 | ASP545 | ALA546 | HIS | ARG | LEU | HIS | ALA | PRO | THR | SER |
|-----|-----|-----|-----|-----|-----|-----|--------|--------|--------|--------|-----|-----|-----|-----|-----|-----|-----|-----|-----|-----|-----|--------|--------|--------|--------|--------|-----|-----|-----|-----|-----|-----|--------|--------|--------|-----|-----|-----|-----|-----|-----|-----|--------|--------|--------|--------|--------|--------|-----|-----|-----|-----|-----|-----|-----|-----|--------|--------|--------|--------|-----|-----|-----|-----|-----|-----|-----|-----|

PRELIMINARY VALIDATION REPORT

## 4 Data and refinement statistics i

| Property                                                                | Value                                                       | Source           |
|-------------------------------------------------------------------------|-------------------------------------------------------------|------------------|
| Space group                                                             | P 1                                                         | Depositor        |
| Cell constants<br>a, b, c, $\alpha$ , $\beta$ , $\gamma$                | 53.27Å 58.80Å 92.67Å<br>79.95° 75.46° 63.10°                | Depositor        |
| Resolution (Å)                                                          | 89.48 – 1.67<br>89.48 – 1.67                                | Depositor<br>EDS |
| % Data completeness<br>(in resolution range)                            | 57.1 (89.48-1.67)<br>57.1 (89.48-1.67)                      | Depositor<br>EDS |
| $R_{merge}$                                                             | (Not available)                                             | Depositor        |
| $R_{sym}$                                                               | (Not available)                                             | Depositor        |
| $\langle I/\sigma(I) \rangle$ <sup>1</sup>                              | 1.07 (at 1.67Å)                                             | Xtrriage         |
| Refinement program                                                      | REFMAC 5.8.0258                                             | Depositor        |
| R, $R_{free}$                                                           | 0.192 , 0.227<br>0.202 , 0.236                              | Depositor<br>DCC |
| $R_{free}$ test set                                                     | 3158 reflections (4.95%)                                    | wwPDB-VP         |
| Wilson B-factor (Å <sup>2</sup> )                                       | 28.8                                                        | Xtrriage         |
| Anisotropy                                                              | 0.048                                                       | Xtrriage         |
| Bulk solvent $k_{sol}$ (e/Å <sup>3</sup> ), $B_{sol}$ (Å <sup>2</sup> ) | 0.36 , 44.8                                                 | EDS              |
| L-test for twinning <sup>2</sup>                                        | $\langle  L  \rangle = 0.50$ , $\langle L^2 \rangle = 0.33$ | Xtrriage         |
| Estimated twinning fraction                                             | 0.084 for h,h-k,h-l                                         | Xtrriage         |
| $F_o, F_c$ correlation                                                  | 0.95                                                        | EDS              |
| Total number of atoms                                                   | 7689                                                        | wwPDB-VP         |
| Average B, all atoms (Å <sup>2</sup> )                                  | 42.0                                                        | wwPDB-VP         |

Xtrriage's analysis on translational NCS is as follows: *The largest off-origin peak in the Patterson function is 5.72% of the height of the origin peak. No significant pseudotranslation is detected.*

<sup>1</sup>Intensities estimated from amplitudes.

<sup>2</sup>Theoretical values of  $\langle |L| \rangle$ ,  $\langle L^2 \rangle$  for acentric reflections are 0.5, 0.333 respectively for untwinned datasets, and 0.375, 0.2 for perfectly twinned datasets.

## 5 Model quality i

### 5.1 Standard geometry i

Bond lengths and bond angles in the following residue types are not validated in this section: LIG, YCM

The Z score for a bond length (or angle) is the number of standard deviations the observed value is removed from the expected value. A bond length (or angle) with  $|Z| > 5$  is considered an outlier worth inspection. RMSZ is the root-mean-square of all Z scores of the bond lengths (or angles).

| Mol | Chain | Bond lengths |         | Bond angles |               |
|-----|-------|--------------|---------|-------------|---------------|
|     |       | RMSZ         | # Z  >5 | RMSZ        | # Z  >5       |
| 1   | A     | 0.44         | 0/1962  | 0.64        | 1/2649 (0.0%) |
| 1   | B     | 0.44         | 0/1772  | 0.66        | 1/2387 (0.0%) |
| 1   | C     | 0.47         | 0/1914  | 0.66        | 1/2585 (0.0%) |
| 1   | D     | 0.48         | 0/1694  | 0.65        | 0/2283        |
| All | All   | 0.46         | 0/7342  | 0.65        | 3/9904 (0.0%) |

Chiral center outliers are detected by calculating the chiral volume of a chiral center and verifying if the center is modelled as a planar moiety or with the opposite hand. A planarity outlier is detected by checking planarity of atoms in a peptide group, atoms in a mainchain group or atoms of a sidechain that are expected to be planar.

| Mol | Chain | #Chirality outliers | #Planarity outliers |
|-----|-------|---------------------|---------------------|
| 1   | A     | 0                   | 2                   |

There are no bond length outliers.

All (3) bond angle outliers are listed below:

| Mol | Chain | Res | Type | Atoms     | Z     | Observed( $^{\circ}$ ) | Ideal( $^{\circ}$ ) |
|-----|-------|-----|------|-----------|-------|------------------------|---------------------|
| 1   | C     | 436 | ARG  | NE-CZ-NH1 | 5.73  | 123.17                 | 120.30              |
| 1   | A     | 436 | ARG  | NE-CZ-NH1 | 5.46  | 123.03                 | 120.30              |
| 1   | B     | 436 | ARG  | NE-CZ-NH2 | -5.12 | 117.74                 | 120.30              |

There are no chirality outliers.

All (2) planarity outliers are listed below:

| Mol | Chain | Res | Type | Group   |
|-----|-------|-----|------|---------|
| 1   | A     | 331 | TYR  | Peptide |
| 1   | A     | 333 | PRO  | Peptide |

## 5.2 Too-close contacts [i](#)

In the following table, the Non-H and H(model) columns list the number of non-hydrogen atoms and hydrogen atoms in the chain respectively. The H(added) column lists the number of hydrogen atoms added and optimized by MolProbity. The Clashes column lists the number of clashes within the asymmetric unit, whereas Symm-Clashes lists symmetry related clashes.

| Mol | Chain | Non-H | H(model) | H(added) | Clashes | Symm-Clashes |
|-----|-------|-------|----------|----------|---------|--------------|
| 1   | A     | 1937  | 0        | 1977     | 22      | 1            |
| 1   | B     | 1755  | 0        | 1807     | 14      | 1            |
| 1   | C     | 1890  | 0        | 1921     | 13      | 0            |
| 1   | D     | 1678  | 0        | 1719     | 8       | 0            |
| 2   | A     | 26    | 0        | 0        | 6       | 0            |
| 2   | B     | 34    | 0        | 0        | 7       | 0            |
| 2   | C     | 28    | 0        | 0        | 6       | 0            |
| 2   | D     | 33    | 0        | 0        | 5       | 0            |
| 3   | S     | 308   | 0        | 0        | 7       | 0            |
| All | All   | 7689  | 0        | 7424     | 71      | 1            |

The all-atom clashscore is defined as the number of clashes found per 1000 atoms (including hydrogen atoms). The all-atom clashscore for this structure is 5.

All (71) close contacts within the same asymmetric unit are listed below, sorted by their clash magnitude.

| Atom-1           | Atom-2           | Interatomic distance (Å) | Clash overlap (Å) |
|------------------|------------------|--------------------------|-------------------|
| 2:C:601:LIG:C01  | 2:C:601:LIG:C05  | 1.75                     | 1.42              |
| 2:B:601:LIG:C05  | 2:B:601:LIG:C01  | 1.75                     | 1.41              |
| 2:A:601:LIG:C01  | 2:A:601:LIG:C05  | 1.75                     | 1.38              |
| 2:C:601:LIG:S42  | 2:C:601:LIG:C03  | 2.11                     | 1.38              |
| 2:D:601:LIG:C05  | 2:D:601:LIG:C01  | 1.75                     | 1.37              |
| 2:D:601:LIG:S42  | 2:D:601:LIG:C03  | 2.12                     | 1.36              |
| 2:B:601:LIG:S42  | 2:B:601:LIG:C03  | 2.12                     | 1.36              |
| 2:A:601:LIG:C03  | 2:A:601:LIG:S42  | 2.12                     | 1.35              |
| 1:C:370:LEU:HD11 | 1:C:475:ILE:HD11 | 1.57                     | 0.84              |
| 1:A:515:ARG:NH1  | 1:B:512:SER:OG   | 2.15                     | 0.80              |
| 1:B:473:ASP:OD2  | 1:B:477:ARG:NH1  | 2.17                     | 0.78              |
| 2:A:601:LIG:C02  | 2:A:601:LIG:S42  | 2.75                     | 0.74              |
| 2:D:601:LIG:S42  | 2:D:601:LIG:C04  | 2.75                     | 0.74              |
| 1:B:546:ALA:O    | 3:S:34:HOH:O     | 2.08                     | 0.71              |
| 2:B:601:LIG:S42  | 2:B:601:LIG:C04  | 2.77                     | 0.70              |
| 2:C:601:LIG:S42  | 2:C:601:LIG:C02  | 2.80                     | 0.68              |
| 1:A:533:VAL:HG12 | 2:A:601:LIG:O21  | 1.93                     | 0.68              |
| 2:C:601:LIG:S42  | 2:C:601:LIG:C04  | 2.79                     | 0.66              |

*Continued on next page...*

Continued from previous page...

| Atom-1           | Atom-2           | Interatomic distance (Å) | Clash overlap (Å) |
|------------------|------------------|--------------------------|-------------------|
| 1:A:333:PRO:O    | 1:A:335:ARG:HG3  | 1.96                     | 0.64              |
| 1:D:376:VAL:HG22 | 1:D:544:LEU:HD12 | 1.81                     | 0.62              |
| 1:B:488:HIS:NE2  | 1:B:492:LYS:HD2  | 2.16                     | 0.61              |
| 2:A:601:LIG:S42  | 2:A:601:LIG:C04  | 2.84                     | 0.60              |
| 1:A:332:ASP:O    | 3:S:242:HOH:O    | 2.17                     | 0.60              |
| 1:A:515:ARG:NE   | 3:S:238:HOH:O    | 2.33                     | 0.59              |
| 2:B:601:LIG:C02  | 2:B:601:LIG:S42  | 2.88                     | 0.58              |
| 1:D:415:GLY:C    | 1:D:422:VAL:HG22 | 2.24                     | 0.58              |
| 1:B:310:LEU:O    | 1:B:481:LYS:CE   | 2.54                     | 0.56              |
| 1:B:477:ARG:NH2  | 3:S:97:HOH:O     | 2.28                     | 0.55              |
| 1:A:461:PHE:HB2  | 1:A:472:LYS:HE3  | 1.90                     | 0.53              |
| 2:C:601:LIG:C08  | 2:C:601:LIG:C01  | 2.76                     | 0.53              |
| 1:C:462:LEU:CD2  | 1:D:430:ALA:HB2  | 2.39                     | 0.53              |
| 2:D:601:LIG:S42  | 2:D:601:LIG:C02  | 2.90                     | 0.53              |
| 1:A:427:MET:CE   | 1:A:516:HIS:HD2  | 2.22                     | 0.53              |
| 1:C:462:LEU:HD21 | 1:D:430:ALA:HB2  | 1.91                     | 0.53              |
| 1:B:463:SER:HB3  | 1:B:468:SER:OG   | 2.10                     | 0.51              |
| 1:A:539:LEU:HG   | 1:A:543:MET:CE   | 2.41                     | 0.50              |
| 1:A:427:MET:HE1  | 1:A:516:HIS:CD2  | 2.48                     | 0.49              |
| 1:D:316:VAL:HG21 | 1:D:489:LEU:HD21 | 1.95                     | 0.48              |
| 1:B:316:VAL:HG21 | 1:B:489:LEU:HD21 | 1.94                     | 0.48              |
| 1:C:396:MET:O    | 1:C:436:ARG:HD3  | 2.13                     | 0.48              |
| 1:C:454:LEU:HD22 | 1:C:475:ILE:HD12 | 1.96                     | 0.47              |
| 1:A:396:MET:O    | 1:A:436:ARG:HD3  | 2.15                     | 0.47              |
| 1:B:354:LEU:O    | 1:B:358:ILE:HD13 | 2.16                     | 0.46              |
| 1:D:376:VAL:CG2  | 1:D:544:LEU:HD12 | 2.45                     | 0.46              |
| 1:A:515:ARG:NH2  | 3:S:238:HOH:O    | 2.49                     | 0.45              |
| 1:C:421:MET:SD   | 2:C:601:LIG:N22  | 2.89                     | 0.45              |
| 1:B:469:LEU:HD13 | 1:C:493:ALA:O    | 2.16                     | 0.45              |
| 1:B:310:LEU:O    | 1:B:481:LYS:HE3  | 2.17                     | 0.45              |
| 1:A:525:LEU:HD23 | 1:A:525:LEU:C    | 2.37                     | 0.44              |
| 1:C:362:LYS:HD2  | 1:C:368:VAL:HG12 | 1.99                     | 0.44              |
| 1:A:427:MET:HE2  | 1:A:513:HIS:CE1  | 2.52                     | 0.44              |
| 1:A:354:LEU:O    | 1:A:358:ILE:HD13 | 2.17                     | 0.44              |
| 1:C:331:TYR:CE2  | 1:C:332:ASP:HB2  | 2.53                     | 0.43              |
| 1:D:353:GLU:OE1  | 2:D:601:LIG:O20  | 2.37                     | 0.43              |
| 1:A:539:LEU:HG   | 1:A:543:MET:HE1  | 1.99                     | 0.43              |
| 1:C:492:LYS:HE2  | 1:C:492:LYS:HB3  | 1.85                     | 0.43              |
| 1:A:427:MET:CE   | 1:A:516:HIS:CD2  | 3.01                     | 0.43              |
| 1:A:427:MET:HE1  | 1:A:516:HIS:HD2  | 1.83                     | 0.43              |
| 1:A:334:THR:O    | 1:A:334:THR:HG23 | 2.19                     | 0.42              |

Continued on next page...

Continued from previous page...

| Atom-1           | Atom-2           | Interatomic distance (Å) | Clash overlap (Å) |
|------------------|------------------|--------------------------|-------------------|
| 1:B:421:MET:HG3  | 2:B:601:LIG:C24  | 2.50                     | 0.42              |
| 1:C:354:LEU:O    | 1:C:358:ILE:HD13 | 2.19                     | 0.42              |
| 1:A:421:MET:SD   | 2:A:601:LIG:N22  | 2.93                     | 0.42              |
| 1:A:368:VAL:HG22 | 3:S:75:HOH:O     | 2.20                     | 0.41              |
| 2:B:601:LIG:C08  | 2:B:601:LIG:C01  | 2.81                     | 0.41              |
| 1:B:421:MET:HG3  | 2:B:601:LIG:F47  | 2.11                     | 0.41              |
| 1:C:370:LEU:CD1  | 1:C:475:ILE:HD11 | 2.40                     | 0.41              |
| 1:D:498:GLN:HA   | 1:D:501:HIS:CE1  | 2.56                     | 0.40              |
| 1:B:341:SER:N    | 3:S:278:HOH:O    | 2.54                     | 0.40              |
| 1:C:354:LEU:HD21 | 1:C:535:PRO:HB3  | 2.04                     | 0.40              |
| 1:A:316:VAL:HG21 | 1:A:489:LEU:HD21 | 2.03                     | 0.40              |
| 1:A:335:ARG:HA   | 1:A:336:PRO:C    | 2.42                     | 0.40              |

All (1) symmetry-related close contacts are listed below. The label for Atom-2 includes the symmetry operator and encoded unit-cell translations to be applied.

| Atom-1         | Atom-2                 | Interatomic distance (Å) | Clash overlap (Å) |
|----------------|------------------------|--------------------------|-------------------|
| 1:A:328:TYR:OH | 1:B:359:ASN:ND2[1_545] | 1.84                     | 0.36              |

## 5.3 Torsion angles [i](#)

### 5.3.1 Protein backbone [i](#)

In the following table, the Percentiles column shows the percent Ramachandran outliers of the chain as a percentile score with respect to all X-ray entries followed by that with respect to entries of similar resolution.

The Analysed column shows the number of residues for which the backbone conformation was analysed, and the total number of residues.

| Mol | Chain | Analysed       | Favoured   | Allowed | Outliers | Percentiles |     |
|-----|-------|----------------|------------|---------|----------|-------------|-----|
| 1   | A     | 240/257 (93%)  | 233 (97%)  | 4 (2%)  | 3 (1%)   | 12          | 2   |
| 1   | B     | 212/257 (82%)  | 210 (99%)  | 2 (1%)  | 0        | 100         | 100 |
| 1   | C     | 232/257 (90%)  | 230 (99%)  | 2 (1%)  | 0        | 100         | 100 |
| 1   | D     | 199/257 (77%)  | 198 (100%) | 1 (0%)  | 0        | 100         | 100 |
| All | All   | 883/1028 (86%) | 871 (99%)  | 9 (1%)  | 3 (0%)   | 41          | 23  |

All (3) Ramachandran outliers are listed below:



| Mol | Chain | Res | Type |
|-----|-------|-----|------|
| 1   | A     | 463 | SER  |
| 1   | A     | 529 | LYS  |
| 1   | A     | 332 | ASP  |

### 5.3.2 Protein sidechains [i](#)

In the following table, the Percentiles column shows the percent sidechain outliers of the chain as a percentile score with respect to all X-ray entries followed by that with respect to entries of similar resolution.

The Analysed column shows the number of residues for which the sidechain conformation was analysed, and the total number of residues.

| Mol | Chain | Analysed      | Rotameric | Outliers | Percentiles |
|-----|-------|---------------|-----------|----------|-------------|
| 1   | A     | 218/232 (94%) | 208 (95%) | 10 (5%)  | 27 9        |
| 1   | B     | 197/232 (85%) | 192 (98%) | 5 (2%)   | 47 26       |
| 1   | C     | 212/232 (91%) | 208 (98%) | 4 (2%)   | 57 38       |
| 1   | D     | 187/232 (81%) | 185 (99%) | 2 (1%)   | 73 61       |
| All | All   | 814/928 (88%) | 793 (97%) | 21 (3%)  | 46 25       |

All (21) residues with a non-rotameric sidechain are listed below:

| Mol | Chain | Res | Type |
|-----|-------|-----|------|
| 1   | A     | 309 | SER  |
| 1   | A     | 334 | THR  |
| 1   | A     | 396 | MET  |
| 1   | A     | 419 | GLU  |
| 1   | A     | 425 | PHE  |
| 1   | A     | 464 | SER  |
| 1   | A     | 492 | LYS  |
| 1   | A     | 515 | ARG  |
| 1   | A     | 531 | LYS  |
| 1   | A     | 538 | ASP  |
| 1   | B     | 396 | MET  |
| 1   | B     | 425 | PHE  |
| 1   | B     | 466 | LEU  |
| 1   | B     | 515 | ARG  |
| 1   | B     | 545 | ASP  |
| 1   | C     | 396 | MET  |
| 1   | C     | 425 | PHE  |
| 1   | C     | 477 | ARG  |
| 1   | C     | 538 | ASP  |

*Continued on next page...*

Continued from previous page...

| Mol | Chain | Res | Type |
|-----|-------|-----|------|
| 1   | D     | 306 | LEU  |
| 1   | D     | 396 | MET  |

Some sidechains can be flipped to improve hydrogen bonding and reduce clashes. All (11) such sidechains are listed below:

| Mol | Chain | Res | Type |
|-----|-------|-----|------|
| 1   | A     | 502 | GLN  |
| 1   | A     | 513 | HIS  |
| 1   | A     | 516 | HIS  |
| 1   | B     | 413 | ASN  |
| 1   | B     | 513 | HIS  |
| 1   | B     | 524 | HIS  |
| 1   | C     | 413 | ASN  |
| 1   | C     | 513 | HIS  |
| 1   | C     | 519 | ASN  |
| 1   | D     | 513 | HIS  |
| 1   | D     | 519 | ASN  |

### 5.3.3 RNA [i](#)

There are no RNA molecules in this entry.

### 5.4 Non-standard residues in protein, DNA, RNA chains [i](#)

There are no non-standard protein/DNA/RNA residues in this entry.

### 5.5 Carbohydrates [i](#)

There are no monosaccharides in this entry.

### 5.6 Ligand geometry [i](#)

Of 4 ligands modelled in this entry, 4 could not be matched to an existing wwPDB Chemical Component Dictionary definition at this stage - leaving 0 for Mogul analysis.

There are no bond length outliers.

There are no bond angle outliers.

There are no chirality outliers.

There are no torsion outliers.

There are no ring outliers.

No monomer is involved in short contacts.

The following is a two-dimensional graphical depiction of Mogul quality analysis of bond lengths, bond angles, torsion angles, and ring geometry for all instances of the Ligand of Interest. In addition, ligands with molecular weight > 250 and outliers as shown on the validation Tables will also be included. For torsion angles, if less than 5% of the Mogul distribution of torsion angles is within 10 degrees of the torsion angle in question, then that torsion angle is considered an outlier. Any bond that is central to one or more torsion angles identified as an outlier by Mogul will be highlighted in the graph. For rings, the root-mean-square deviation (RMSD) between the ring in question and similar rings identified by Mogul is calculated over all ring torsion angles. If the average RMSD is greater than 60 degrees and the minimal RMSD between the ring in question and any Mogul-identified rings is also greater than 60 degrees, then that ring is considered an outlier. The outliers are highlighted in purple. The color gray indicates Mogul did not find sufficient equivalents in the CSD to analyse the geometry.

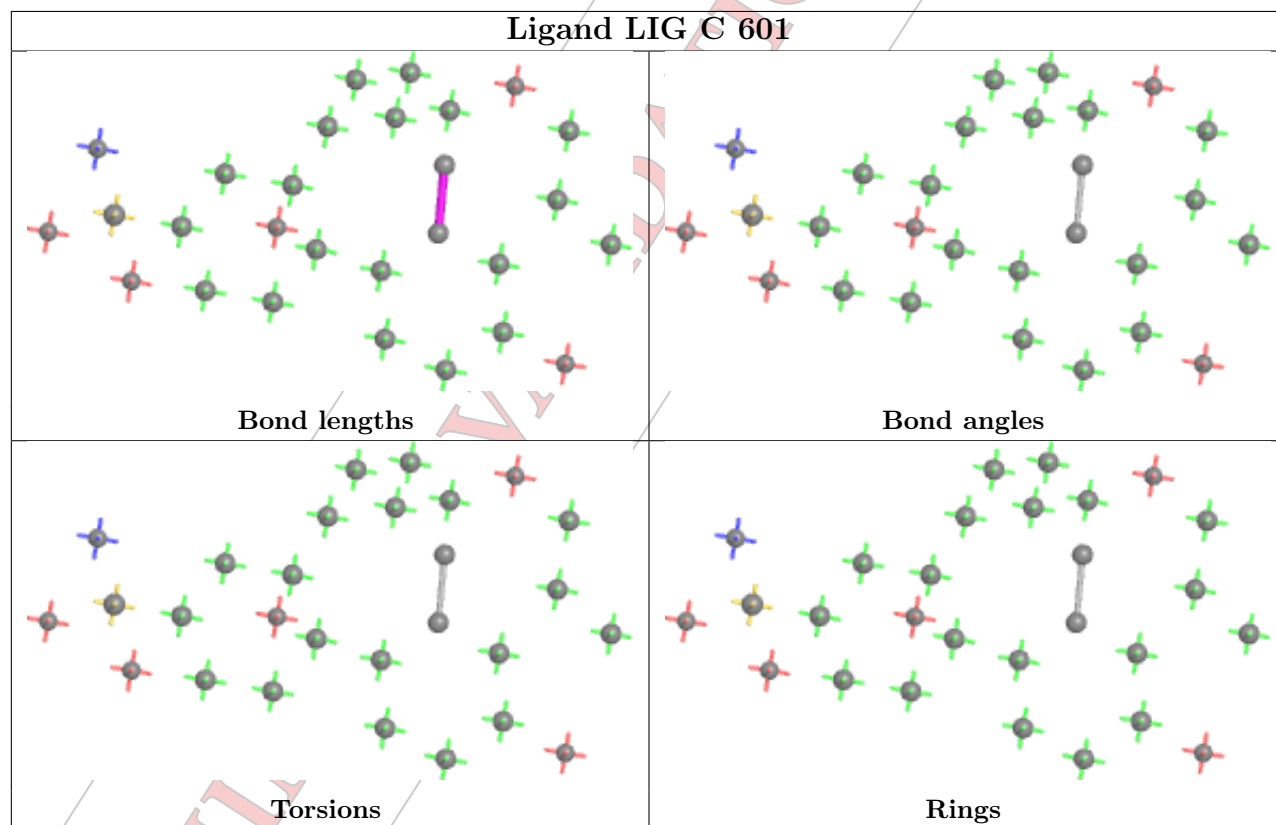

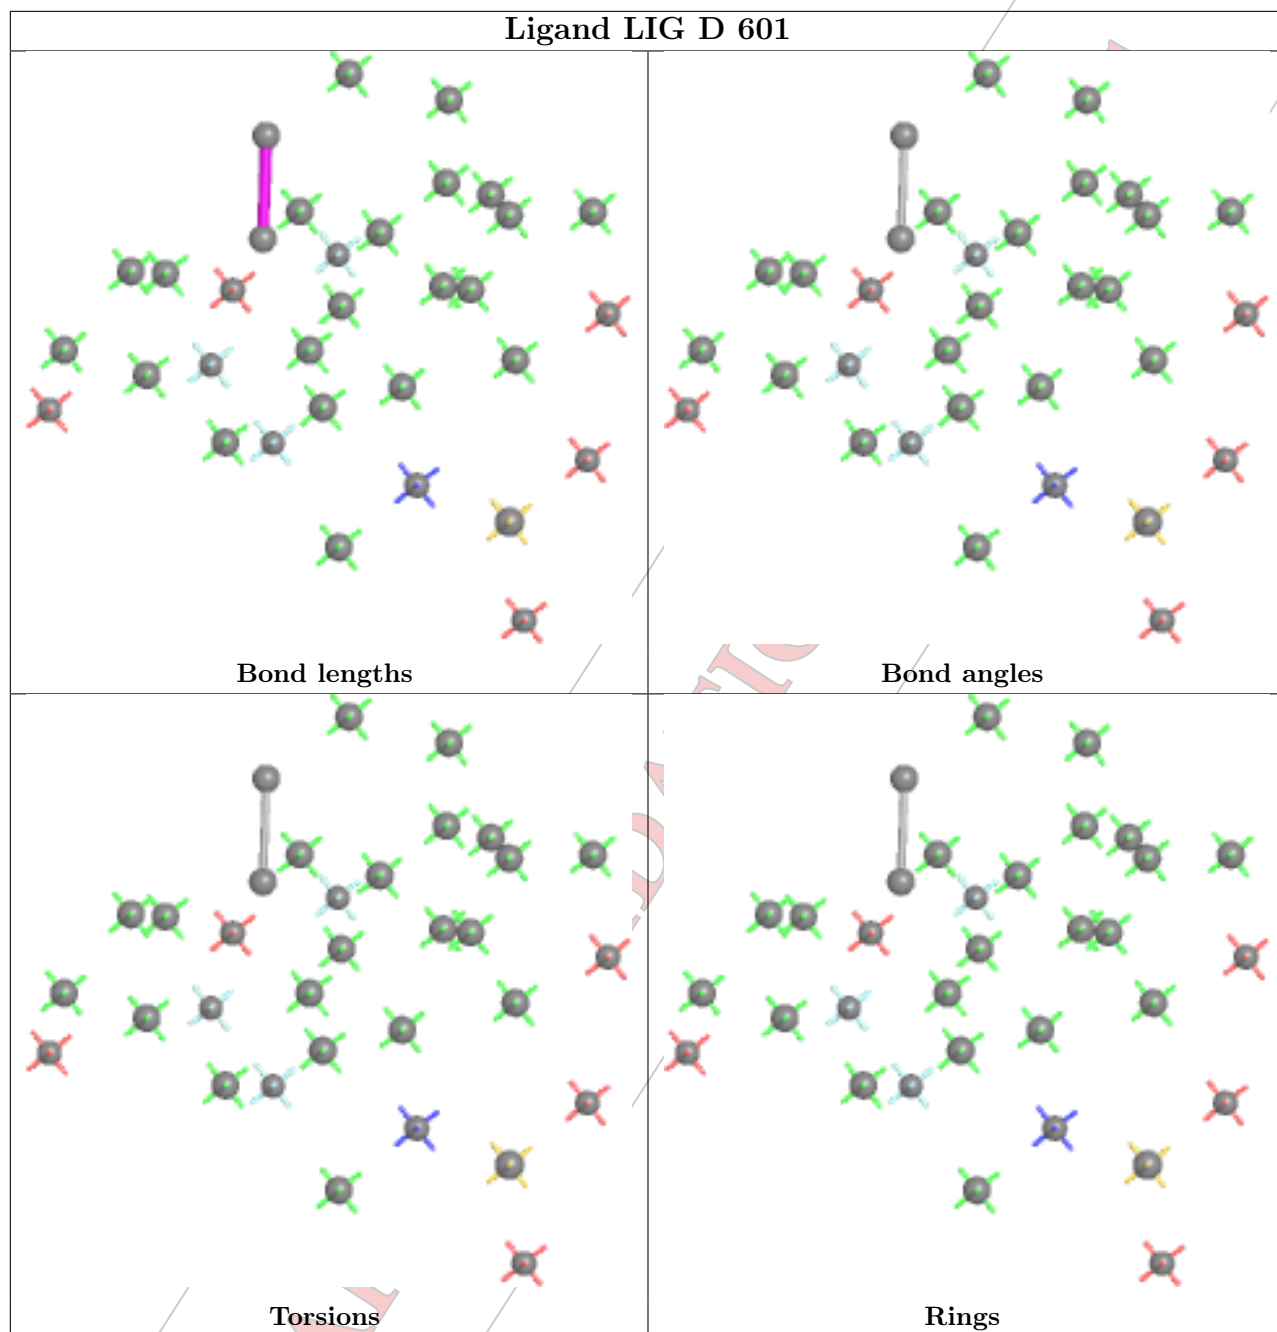

PRELIMINARY

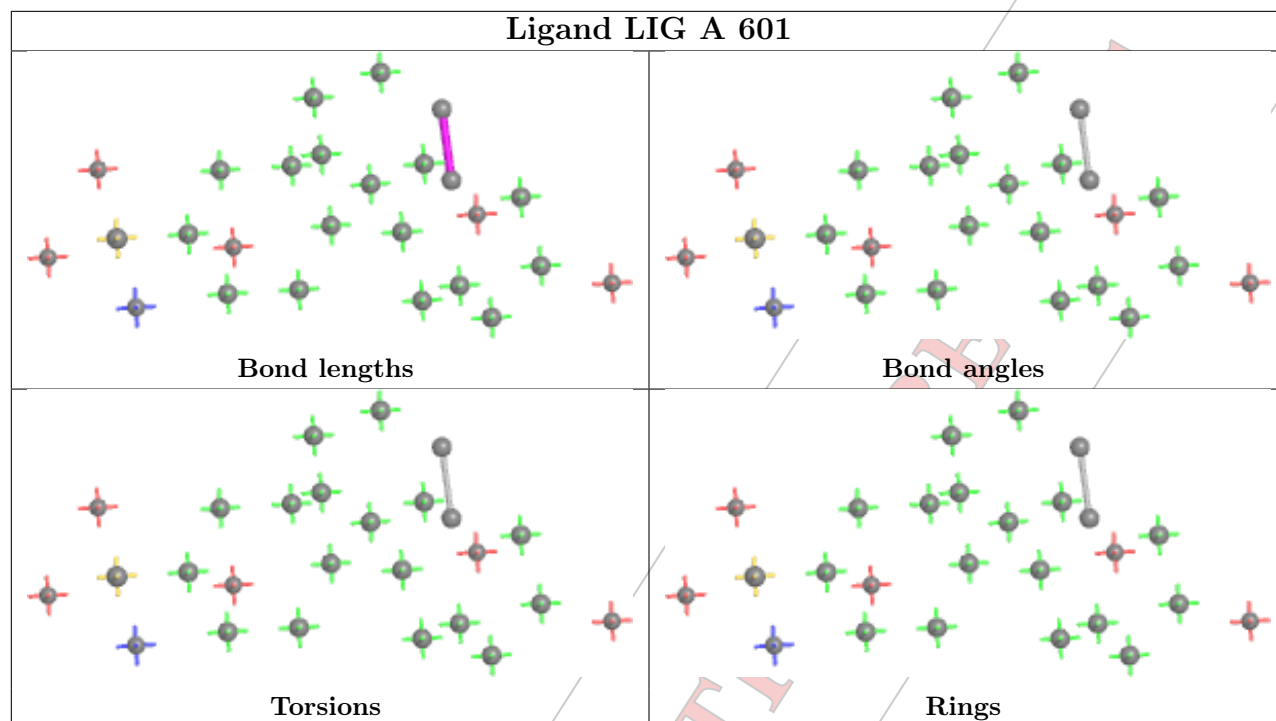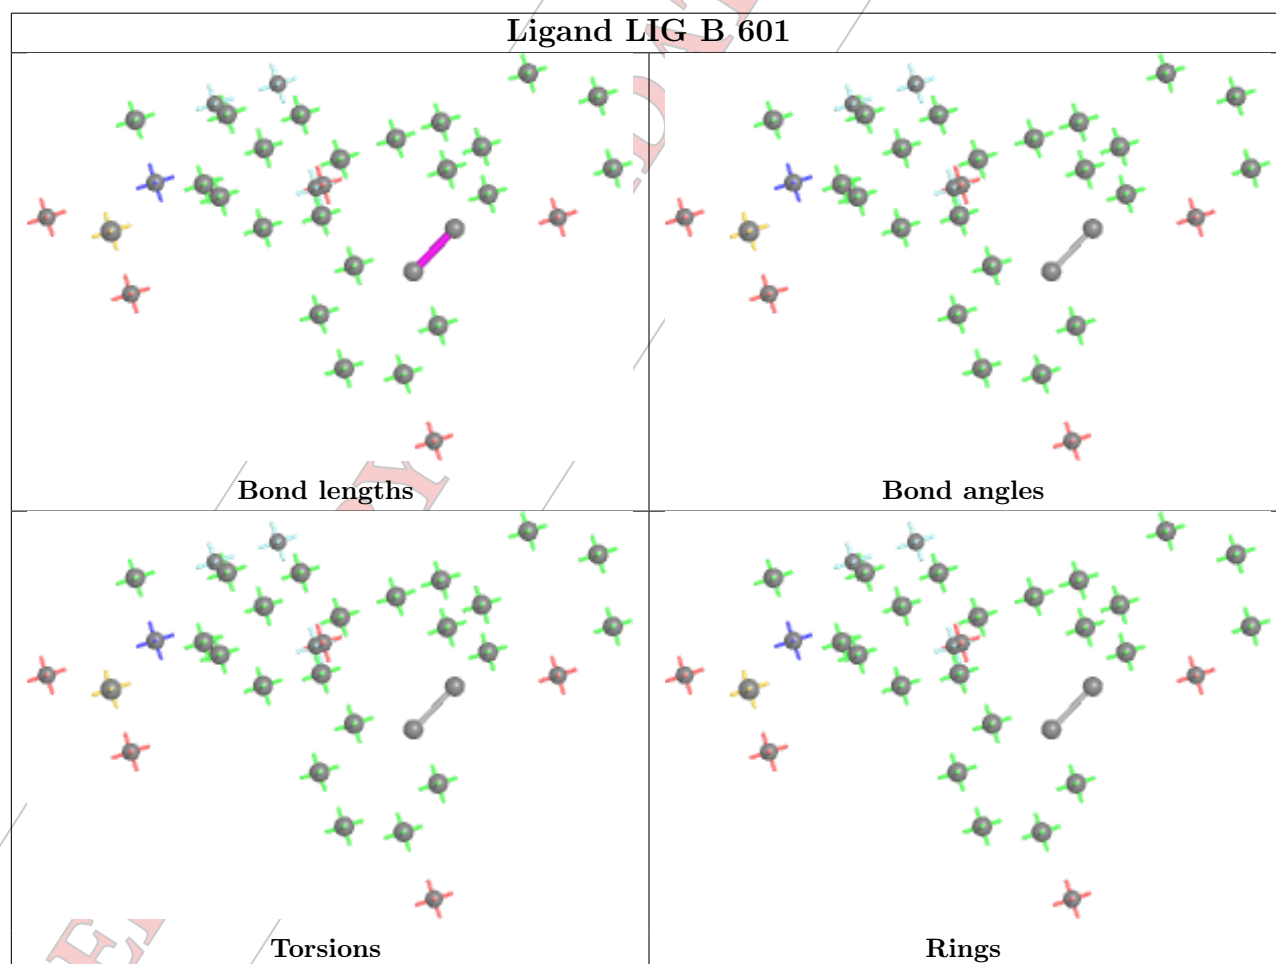

## 5.7 Other polymers [i](#)

There are no such residues in this entry.

## 5.8 Polymer linkage issues [i](#)

There are no chain breaks in this entry.

PRELIMINARY VALIDATION REPORT

## 6 Fit of model and data i

### 6.1 Protein, DNA and RNA chains i

In the following table, the column labelled '#RSRZ > 2' contains the number (and percentage) of RSRZ outliers, followed by percent RSRZ outliers for the chain as percentile scores relative to all X-ray entries and entries of similar resolution. The OWAB column contains the minimum, median, 95<sup>th</sup> percentile and maximum values of the occupancy-weighted average B-factor per residue. The column labelled 'Q < 0.9' lists the number of (and percentage) of residues with an average occupancy less than 0.9.

| Mol | Chain | Analysed       | <RSRZ> | #RSRZ>2       | OWAB(Å <sup>2</sup> ) | Q<0.9 |
|-----|-------|----------------|--------|---------------|-----------------------|-------|
| 1   | A     | 241/257 (93%)  | 0.53   | 19 (7%) 12 13 | 18, 42, 85, 131       | 0     |
| 1   | B     | 220/257 (85%)  | 0.13   | 5 (2%) 60 64  | 18, 36, 78, 104       | 0     |
| 1   | C     | 235/257 (91%)  | 0.37   | 13 (5%) 25 26 | 18, 36, 69, 106       | 0     |
| 1   | D     | 209/257 (81%)  | 0.16   | 4 (1%) 66 70  | 19, 36, 75, 91        | 0     |
| All | All   | 905/1028 (88%) | 0.31   | 41 (4%) 33 35 | 18, 38, 78, 131       | 0     |

All (41) RSRZ outliers are listed below:

| Mol | Chain | Res | Type | RSRZ |
|-----|-------|-----|------|------|
| 1   | A     | 305 | SER  | 8.9  |
| 1   | C     | 305 | SER  | 8.5  |
| 1   | A     | 530 | CYS  | 8.2  |
| 1   | A     | 462 | LEU  | 6.7  |
| 1   | A     | 333 | PRO  | 5.7  |
| 1   | B     | 306 | LEU  | 5.5  |
| 1   | A     | 531 | LYS  | 5.1  |
| 1   | D     | 461 | PHE  | 4.8  |
| 1   | C     | 462 | LEU  | 4.7  |
| 1   | C     | 464 | SER  | 4.6  |
| 1   | C     | 527 | SER  | 4.5  |
| 1   | A     | 306 | LEU  | 4.4  |
| 1   | B     | 421 | MET  | 4.2  |
| 1   | D     | 469 | LEU  | 4.2  |
| 1   | A     | 334 | THR  | 4.1  |
| 1   | A     | 307 | ALA  | 4.0  |
| 1   | A     | 529 | LYS  | 3.8  |
| 1   | C     | 306 | LEU  | 3.7  |
| 1   | A     | 525 | LEU  | 3.6  |
| 1   | D     | 305 | SER  | 3.4  |
| 1   | A     | 332 | ASP  | 3.3  |

*Continued on next page...*

Continued from previous page...

| Mol | Chain | Res    | Type | RSRZ |
|-----|-------|--------|------|------|
| 1   | C     | 309    | SER  | 3.3  |
| 1   | B     | 462    | LEU  | 3.1  |
| 1   | A     | 416    | LYS  | 3.1  |
| 1   | A     | 494    | GLY  | 3.1  |
| 1   | A     | 528    | MET  | 3.0  |
| 1   | C     | 524    | HIS  | 2.9  |
| 1   | A     | 464    | SER  | 2.8  |
| 1   | A     | 532    | ASN  | 2.7  |
| 1   | C     | 417    | CYS  | 2.7  |
| 1   | C     | 463    | SER  | 2.6  |
| 1   | B     | 420    | GLY  | 2.5  |
| 1   | A     | 418    | VAL  | 2.4  |
| 1   | C     | 307    | ALA  | 2.3  |
| 1   | D     | 473    | ASP  | 2.3  |
| 1   | C     | 418    | VAL  | 2.2  |
| 1   | B     | 524    | HIS  | 2.1  |
| 1   | A     | 310    | LEU  | 2.1  |
| 1   | C     | 397[A] | GLU  | 2.0  |
| 1   | A     | 526    | TYR  | 2.0  |
| 1   | C     | 473    | ASP  | 2.0  |

## 6.2 Non-standard residues in protein, DNA, RNA chains [i](#)

There are no non-standard protein/DNA/RNA residues in this entry.

## 6.3 Carbohydrates [i](#)

There are no monosaccharides in this entry.

## 6.4 Ligands [i](#)

In the following table, the Atoms column lists the number of modelled atoms in the group and the number defined in the chemical component dictionary. The B-factors column lists the minimum, median, 95<sup>th</sup> percentile and maximum values of B factors of atoms in the group. The column labelled 'Q< 0.9' lists the number of atoms with occupancy less than 0.9.

| Mol | Type | Chain | Res | Atoms | RSCC | RSR  | B-factors(Å <sup>2</sup> ) | Q<0.9 |
|-----|------|-------|-----|-------|------|------|----------------------------|-------|
| 2   | LIG  | D     | 601 | 33/?  | 0.84 | 0.18 | 38,68,108,119              | 0     |
| 2   | LIG  | C     | 601 | 28/?  | 0.86 | 0.16 | 34,59,83,90                | 0     |
| 2   | LIG  | A     | 601 | 26/?  | 0.87 | 0.14 | 31,52,77,94                | 0     |

Continued on next page...



Continued from previous page...

| Mol | Type | Chain | Res | Atoms | RSCC | RSR  | B-factors( $\text{\AA}^2$ ) | Q<0.9 |
|-----|------|-------|-----|-------|------|------|-----------------------------|-------|
| 2   | LIG  | B     | 601 | 34/?  | 0.88 | 0.16 | 38,68,131,181               | 0     |

The following is a graphical depiction of the model fit to experimental electron density of all instances of the Ligand of Interest. In addition, ligands with molecular weight > 250 and outliers as shown on the geometry validation Tables will also be included. Each fit is shown from different orientation to approximate a three-dimensional view.

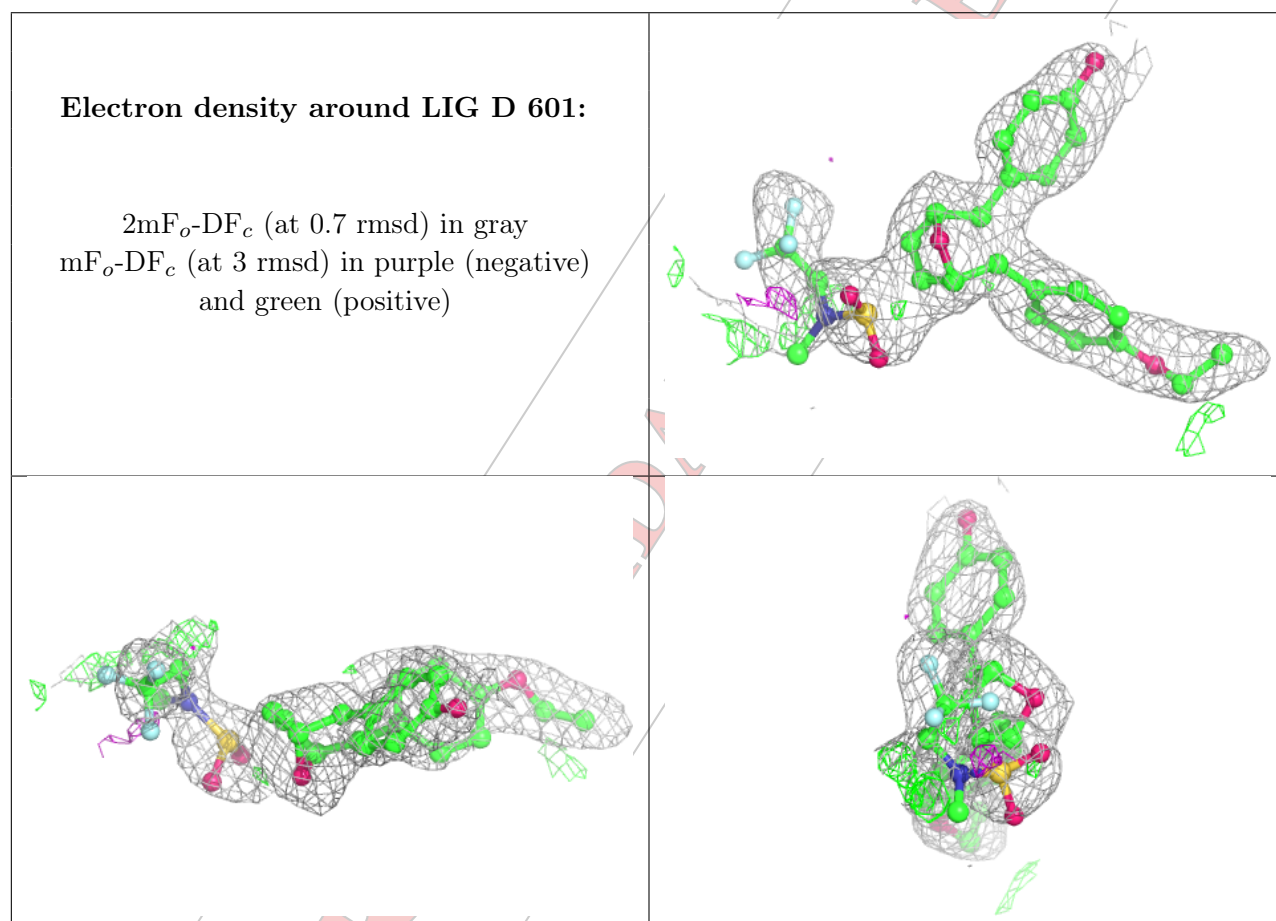

PRELIMINARY

**Electron density around LIG C 601:**

$2mF_o-DF_c$  (at 0.7 rmsd) in gray  
 $mF_o-DF_c$  (at 3 rmsd) in purple (negative)  
and green (positive)

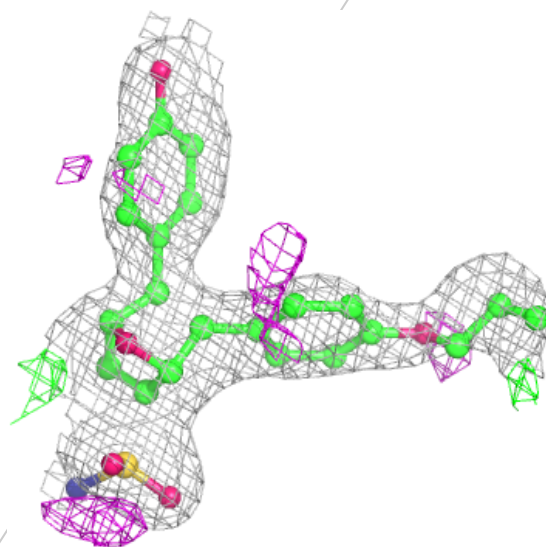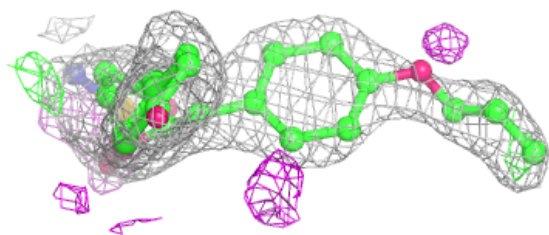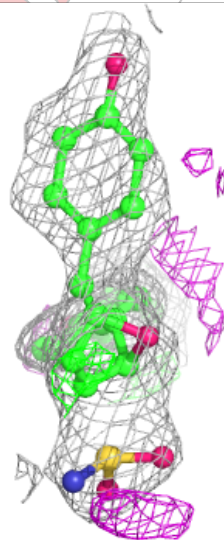

PRELIMINARY

**Electron density around LIG A 601:**

$2mF_o-DF_c$  (at 0.7 rmsd) in gray  
 $mF_o-DF_c$  (at 3 rmsd) in purple (negative)  
and green (positive)

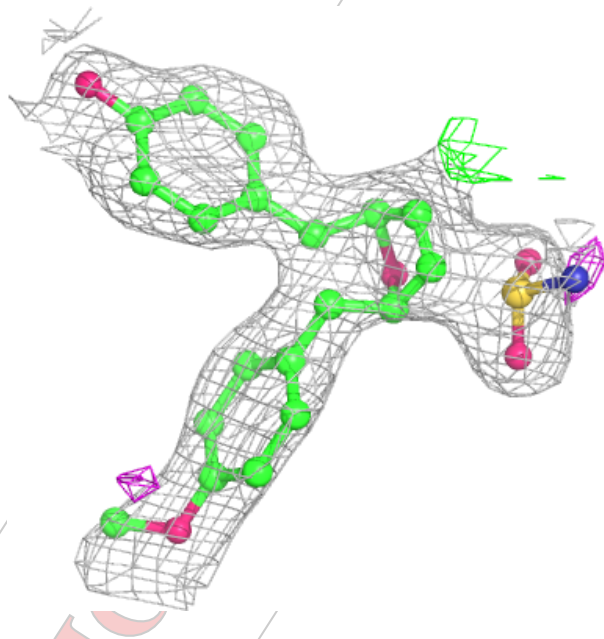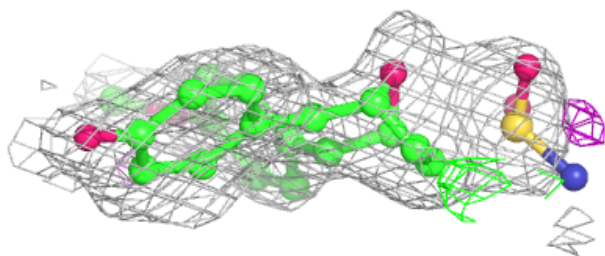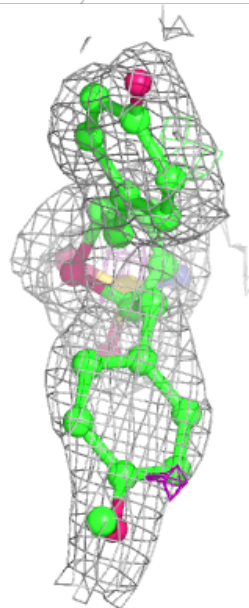

PRELIMINARY

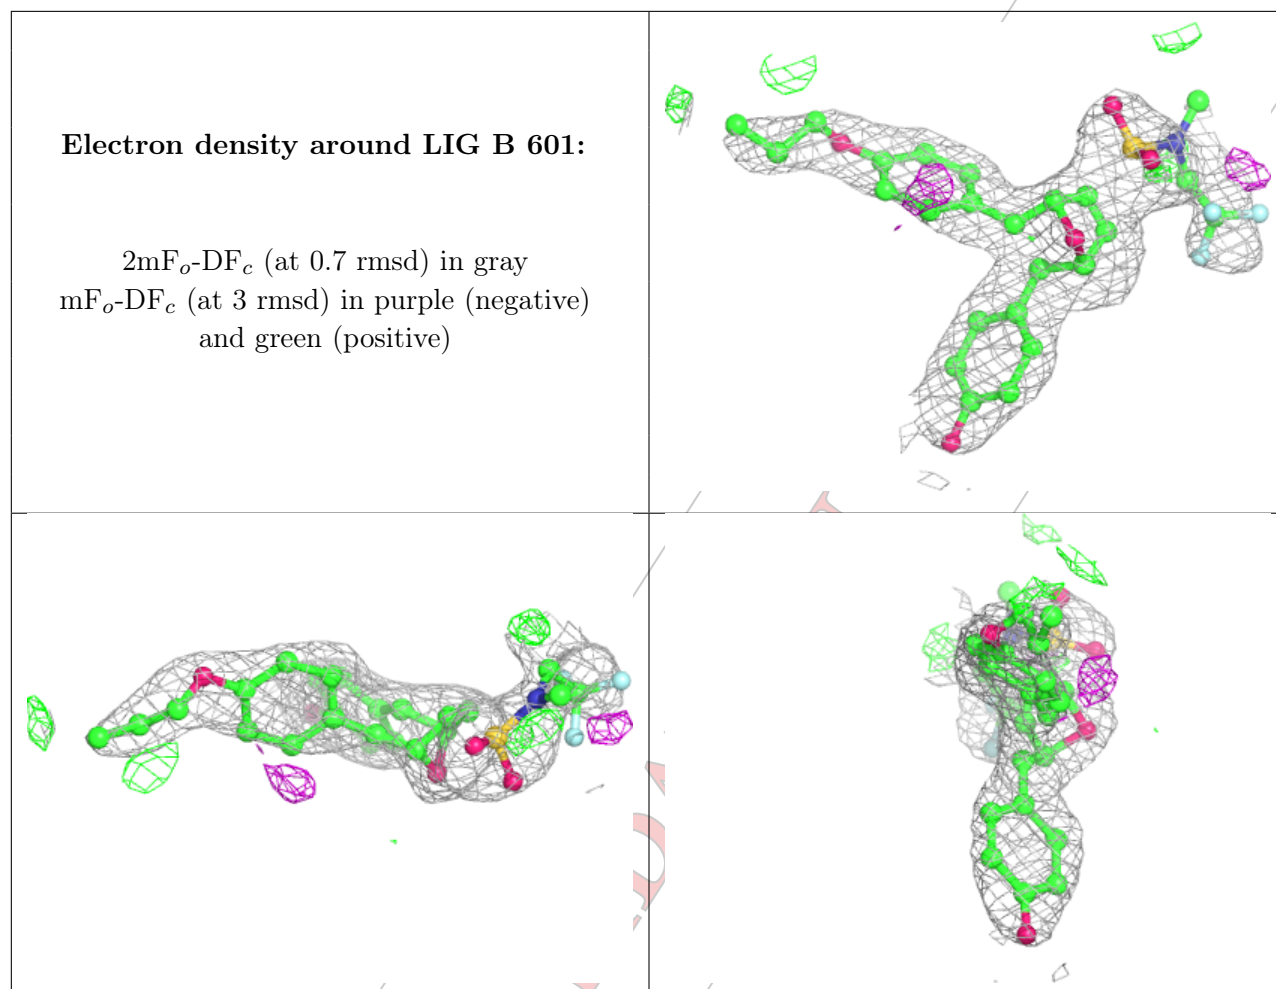

## 6.5 Other polymers [\(i\)](#)

There are no such residues in this entry.

PRELIMINARY VALIDATION



# Preliminary Full wwPDB X-ray Structure Validation Report ⓘ

Aug 9, 2020 – 10:10 PM EDT

Deposition ID : D\_1000251218

This is a Preliminary Full wwPDB X-ray Structure Validation Report.

This report is produced by the wwPDB Deposition System during initial deposition but before annotation of the structure.

We welcome your comments at [validation@mail.wwpdb.org](mailto:validation@mail.wwpdb.org)

A user guide is available at

<https://www.wwpdb.org/validation/2017/XrayValidationReportHelp>

with specific help available everywhere you see the ⓘ symbol.

---

The following versions of software and data (see [references ⓘ](#)) were used in the production of this report:

|                                |   |                                                                    |
|--------------------------------|---|--------------------------------------------------------------------|
| MolProbity                     | : | 4.02b-467                                                          |
| Mogul                          | : | 1.8.5 (274361), CSD as541be (2020)                                 |
| Xtriage (Phenix)               | : | 1.13                                                               |
| EDS                            | : | 2.13.1                                                             |
| buster-report                  | : | 1.1.7 (2018)                                                       |
| Percentile statistics          | : | 20191225.v01 (using entries in the PDB archive December 25th 2019) |
| Refmac                         | : | 5.8.0158                                                           |
| CCP4                           | : | 7.0.044 (Gargrove)                                                 |
| Ideal geometry (proteins)      | : | Engh & Huber (2001)                                                |
| Ideal geometry (DNA, RNA)      | : | Parkinson et al. (1996)                                            |
| Validation Pipeline (wwPDB-VP) | : | 2.13.1                                                             |

# 1 Overall quality at a glance i

The following experimental techniques were used to determine the structure:  
*X-RAY DIFFRACTION*

The reported resolution of this entry is 1.59 Å.

Percentile scores (ranging between 0-100) for global validation metrics of the entry are shown in the following graphic. The table shows the number of entries on which the scores are based.

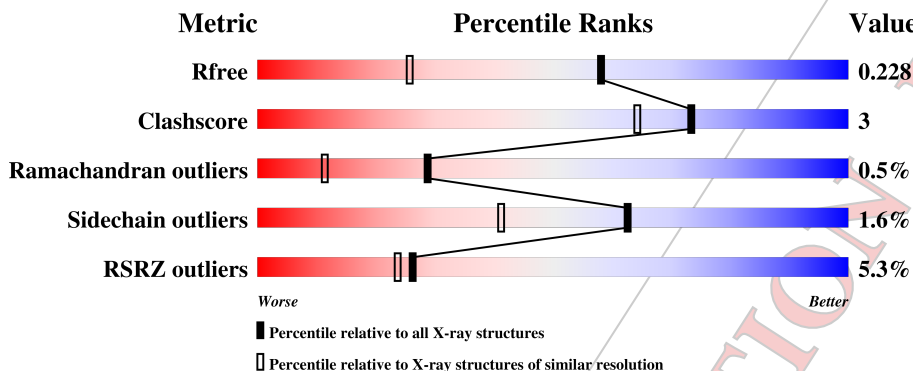

| Metric                | Whole archive<br>(#Entries) | Similar resolution<br>(#Entries, resolution range(Å)) |
|-----------------------|-----------------------------|-------------------------------------------------------|
| $R_{free}$            | 130704                      | 3398 (1.60-1.60)                                      |
| Clashscore            | 141614                      | 3665 (1.60-1.60)                                      |
| Ramachandran outliers | 138981                      | 3564 (1.60-1.60)                                      |
| Sidechain outliers    | 138945                      | 3563 (1.60-1.60)                                      |
| RSRZ outliers         | 127900                      | 3321 (1.60-1.60)                                      |

The table below summarises the geometric issues observed across the polymeric chains and their fit to the electron density. The red, orange, yellow and green segments on the lower bar indicate the fraction of residues that contain outliers for  $\geq 3$ , 2, 1 and 0 types of geometric quality criteria respectively. A grey segment represents the fraction of residues that are not modelled. The numeric value for each fraction is indicated below the corresponding segment, with a dot representing fractions  $\leq 5\%$ . The upper red bar (where present) indicates the fraction of residues that have poor fit to the electron density. The numeric value is given above the bar.

| Mol | Chain | Length | Quality of chain    |
|-----|-------|--------|---------------------|
| 1   | A     | 257    | <br>3% 82% 6% • 10% |
| 1   | B     | 257    | <br>4% 83% • 14%    |
| 1   | C     | 257    | <br>7% 83% 7% • 9%  |
| 1   | D     | 257    | <br>5% 85% • 12%    |

The following table lists non-polymeric compounds, carbohydrate monomers and non-standard

residues in protein, DNA, RNA chains that are outliers for geometric or electron-density-fit criteria:

| Mol | Type | Chain | Res | Chirality | Geometry | Clashes | Electron density |
|-----|------|-------|-----|-----------|----------|---------|------------------|
| 2   | LIG  | A     | 601 | -         | -        | X       | -                |
| 2   | LIG  | C     | 601 | -         | -        | X       | -                |

PRELIMINARY VALIDATION REPORT

## 2 Entry composition i

There are 3 unique types of molecules in this entry. The entry contains 7925 atoms, of which 0 are hydrogens and 0 are deuteriums.

In the tables below, the ZeroOcc column contains the number of atoms modelled with zero occupancy, the AltConf column contains the number of residues with at least one atom in alternate conformation and the Trace column contains the number of residues modelled with at most 2 atoms.

- Molecule 1 is a protein called Estrogen Receptor.

| Mol | Chain | Residues | Atoms         |           |          |          |         | ZeroOcc | AltConf | Trace |
|-----|-------|----------|---------------|-----------|----------|----------|---------|---------|---------|-------|
|     |       |          | Total         | C         | N        | O        | S       |         |         |       |
| 1   | A     | 231      | Total<br>1850 | C<br>1183 | N<br>313 | O<br>337 | S<br>17 | 0       | 1       | 0     |
| 1   | B     | 221      | Total<br>1765 | C<br>1130 | N<br>302 | O<br>316 | S<br>17 | 0       | 0       | 0     |
| 1   | C     | 233      | Total<br>1859 | C<br>1186 | N<br>315 | O<br>341 | S<br>17 | 0       | 1       | 0     |
| 1   | D     | 227      | Total<br>1809 | C<br>1158 | N<br>307 | O<br>326 | S<br>18 | 0       | 0       | 0     |

- Molecule 2 is a ligand with the chemical component id LIG but its atom names do not match the existing wwPDB Chemical Component Dictionary definition for LIG. Consequently no firm identification of ligand chemistry can be made. Once the structure is annotated then an identification and diagram will be given here.

| Mol | Chain | Residues | Atoms       |         |        |        |        | ZeroOcc | AltConf |   |
|-----|-------|----------|-------------|---------|--------|--------|--------|---------|---------|---|
|     |       |          | Total       | C       | F      | N      | O      |         |         | S |
| 2   | A     | 1        | Total<br>38 | C<br>28 | F<br>3 | N<br>1 | O<br>5 | S<br>1  | 0       | 0 |
| 2   | B     | 1        | Total<br>42 | C<br>30 | F<br>3 | N<br>1 | O<br>7 | S<br>1  | 0       | 0 |
| 2   | C     | 1        | Total<br>38 | C<br>28 | F<br>3 | N<br>1 | O<br>5 | S<br>1  | 0       | 0 |
| 2   | D     | 1        | Total<br>42 | C<br>30 | F<br>3 | N<br>1 | O<br>7 | S<br>1  | 0       | 0 |

- Molecule 3 is water.

| Mol | Chain | Residues | Atoms        |          | ZeroOcc | AltConf |
|-----|-------|----------|--------------|----------|---------|---------|
| 3   | S     | 482      | Total<br>482 | O<br>482 | 0       | 0       |



### 3 Residue-property plots

These plots are drawn for all protein, RNA, DNA and oligosaccharide chains in the entry. The first graphic for a chain summarises the proportions of the various outlier classes displayed in the second graphic. The second graphic shows the sequence view annotated by issues in geometry and electron density. Residues are color-coded according to the number of geometric quality criteria for which they contain at least one outlier: green = 0, yellow = 1, orange = 2 and red = 3 or more. A red dot above a residue indicates a poor fit to the electron density ( $RSRZ > 2$ ). Stretches of 2 or more consecutive residues without any outlier are shown as a green connector. Residues present in the sample, but not in the model, are shown in grey.

- Molecule 1: Estrogen Receptor

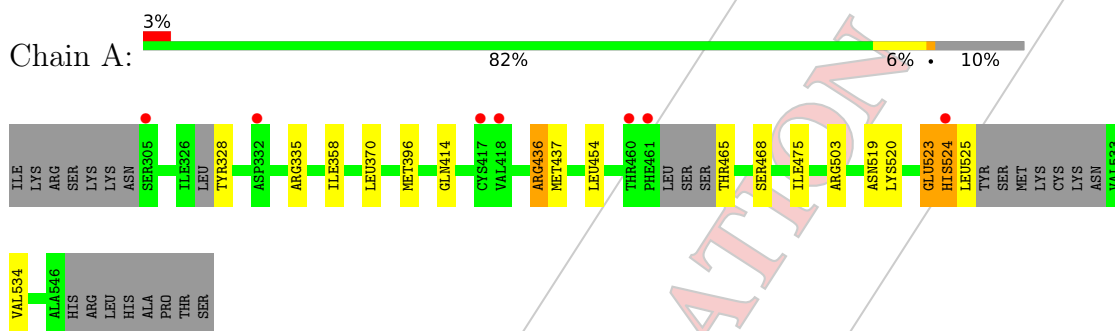

- Molecule 1: Estrogen Receptor

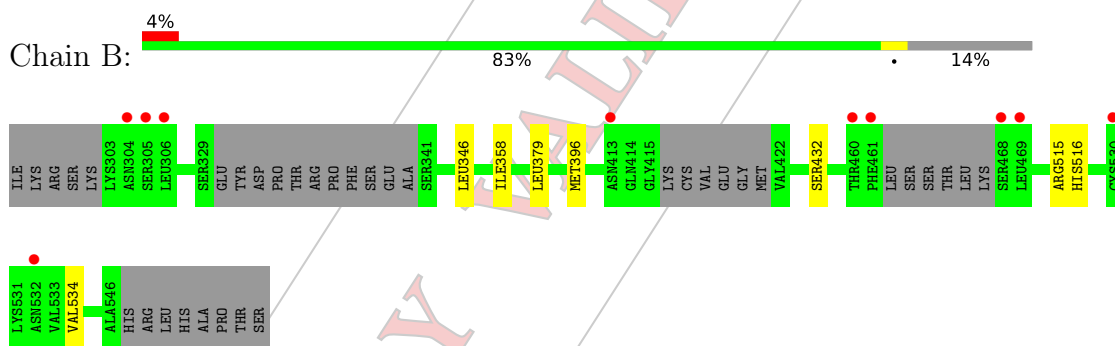

- Molecule 1: Estrogen Receptor

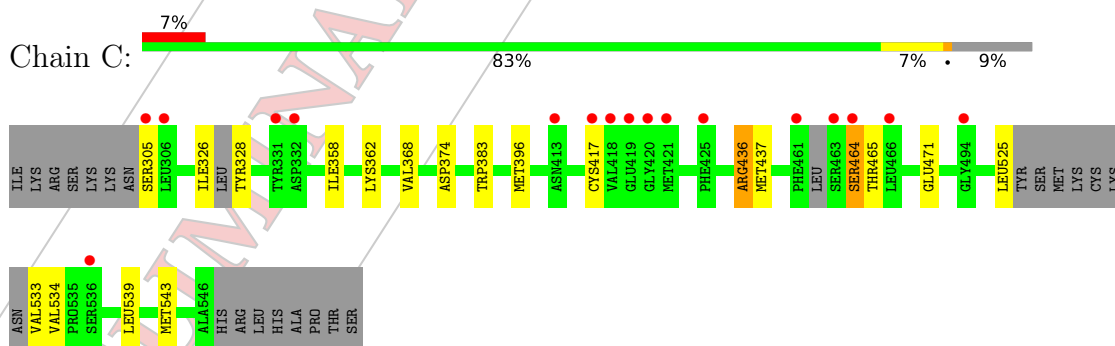

- Molecule 1: Estrogen Receptor

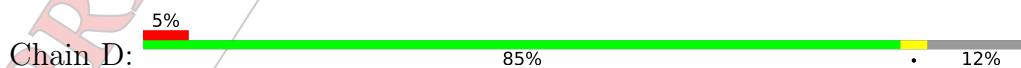

|        |   |
|--------|---|
| ILE    |   |
| LYS    |   |
| ARG    |   |
| SER    |   |
| LYS    |   |
| LYS    |   |
| ASN    |   |
| SER306 | ● |
| LEU306 | ● |
| TYR328 | ● |
| SER329 | ● |
| GLI330 | ● |
| TYR    |   |
| ASP    |   |
| PRO    |   |
| THR    |   |
| ARG    |   |
| PRO    |   |
| PHE    |   |
| SER    |   |
| GLU    |   |
| ALA    |   |
| SER341 | ● |
| HIS356 | ● |
| MET357 | ● |
| ILE368 | ● |
| HIS398 | ● |
| LYS401 | ● |
| GLY415 | ● |
| LYS    |   |
| CYS    |   |
| VAL    |   |
| GLU    |   |
| GLY    |   |
| MET421 | ● |
| PHE425 | ● |
| SER432 | ● |
| LEU462 | ● |
| SER463 | ● |
| LYS492 | ● |
| ARG515 | ● |
| TYR526 | ● |
| SER527 | ● |
| MET528 | ● |
| LYS529 | ● |
| CYS530 | ● |
| LYS531 | ● |
| ASN532 | ● |

|        |   |
|--------|---|
| LEU544 | ● |
| ASP545 | ● |
| ALA546 | ● |
| HIS    |   |
| ARG    |   |
| LEU    |   |
| HIS    |   |
| ALA    |   |
| PRO    |   |
| THR    |   |
| SER    |   |

PRELIMINARY VALIDATION REPORT

## 4 Data and refinement statistics i

| Property                                                                | Value                                                       | Source           |
|-------------------------------------------------------------------------|-------------------------------------------------------------|------------------|
| Space group                                                             | P 1                                                         | Depositor        |
| Cell constants<br>a, b, c, $\alpha$ , $\beta$ , $\gamma$                | 53.58Å 58.77Å 93.15Å<br>86.71° 75.09° 62.87°                | Depositor        |
| Resolution (Å)                                                          | 89.80 – 1.59<br>89.80 – 1.59                                | Depositor<br>EDS |
| % Data completeness<br>(in resolution range)                            | 71.0 (89.80-1.59)<br>71.0 (89.80-1.59)                      | Depositor<br>EDS |
| $R_{merge}$                                                             | (Not available)                                             | Depositor        |
| $R_{sym}$                                                               | (Not available)                                             | Depositor        |
| $\langle I/\sigma(I) \rangle$ <sup>1</sup>                              | 1.34 (at 1.58Å)                                             | Xtrriage         |
| Refinement program                                                      | REFMAC 5.8.0253                                             | Depositor        |
| R, $R_{free}$                                                           | 0.186 , 0.219<br>0.197 , 0.228                              | Depositor<br>DCC |
| $R_{free}$ test set                                                     | 4613 reflections (4.93%)                                    | wwPDB-VP         |
| Wilson B-factor (Å <sup>2</sup> )                                       | 23.7                                                        | Xtrriage         |
| Anisotropy                                                              | 0.025                                                       | Xtrriage         |
| Bulk solvent $k_{sol}$ (e/Å <sup>3</sup> ), $B_{sol}$ (Å <sup>2</sup> ) | 0.37 , 50.8                                                 | EDS              |
| L-test for twinning <sup>2</sup>                                        | $\langle  L  \rangle = 0.50$ , $\langle L^2 \rangle = 0.33$ | Xtrriage         |
| Estimated twinning fraction                                             | 0.079 for h,h-k,h-l                                         | Xtrriage         |
| $F_o, F_c$ correlation                                                  | 0.95                                                        | EDS              |
| Total number of atoms                                                   | 7925                                                        | wwPDB-VP         |
| Average B, all atoms (Å <sup>2</sup> )                                  | 34.0                                                        | wwPDB-VP         |

Xtrriage's analysis on translational NCS is as follows: *The largest off-origin peak in the Patterson function is 5.73% of the height of the origin peak. No significant pseudotranslation is detected.*

<sup>1</sup>Intensities estimated from amplitudes.

<sup>2</sup>Theoretical values of  $\langle |L| \rangle$ ,  $\langle L^2 \rangle$  for acentric reflections are 0.5, 0.333 respectively for untwinned datasets, and 0.375, 0.2 for perfectly twinned datasets.

## 5 Model quality i

### 5.1 Standard geometry i

Bond lengths and bond angles in the following residue types are not validated in this section: LIG, YCM

The Z score for a bond length (or angle) is the number of standard deviations the observed value is removed from the expected value. A bond length (or angle) with  $|Z| > 5$  is considered an outlier worth inspection. RMSZ is the root-mean-square of all Z scores of the bond lengths (or angles).

| Mol | Chain | Bond lengths |               | Bond angles |               |
|-----|-------|--------------|---------------|-------------|---------------|
|     |       | RMSZ         | # Z  >5       | RMSZ        | # Z  >5       |
| 1   | A     | 0.69         | 0/1871        | 0.76        | 2/2525 (0.1%) |
| 1   | B     | 0.64         | 0/1783        | 0.76        | 2/2403 (0.1%) |
| 1   | C     | 0.59         | 1/1880 (0.1%) | 0.71        | 3/2537 (0.1%) |
| 1   | D     | 0.58         | 0/1828        | 0.73        | 1/2465 (0.0%) |
| All | All   | 0.63         | 1/7362 (0.0%) | 0.74        | 8/9930 (0.1%) |

All (1) bond length outliers are listed below:

| Mol | Chain | Res | Type | Atoms | Z     | Observed(Å) | Ideal(Å) |
|-----|-------|-----|------|-------|-------|-------------|----------|
| 1   | C     | 383 | TRP  | CB-CG | -5.37 | 1.40        | 1.50     |

All (8) bond angle outliers are listed below:

| Mol | Chain | Res | Type | Atoms     | Z     | Observed(°) | Ideal(°) |
|-----|-------|-----|------|-----------|-------|-------------|----------|
| 1   | A     | 503 | ARG  | NE-CZ-NH1 | 7.00  | 123.80      | 120.30   |
| 1   | C     | 436 | ARG  | NE-CZ-NH1 | 6.34  | 123.47      | 120.30   |
| 1   | C     | 464 | SER  | N-CA-C    | 5.89  | 126.90      | 111.00   |
| 1   | A     | 436 | ARG  | NE-CZ-NH1 | 5.64  | 123.12      | 120.30   |
| 1   | B     | 515 | ARG  | NE-CZ-NH2 | -5.33 | 117.64      | 120.30   |
| 1   | D     | 515 | ARG  | NE-CZ-NH2 | -5.27 | 117.66      | 120.30   |
| 1   | C     | 436 | ARG  | NE-CZ-NH2 | -5.27 | 117.67      | 120.30   |
| 1   | B     | 515 | ARG  | CG-CD-NE  | -5.04 | 101.22      | 111.80   |

There are no chirality outliers.

There are no planarity outliers.

## 5.2 Too-close contacts [i](#)

In the following table, the Non-H and H(model) columns list the number of non-hydrogen atoms and hydrogen atoms in the chain respectively. The H(added) column lists the number of hydrogen atoms added and optimized by MolProbity. The Clashes column lists the number of clashes within the asymmetric unit, whereas Symm-Clashes lists symmetry related clashes.

| Mol | Chain | Non-H | H(model) | H(added) | Clashes | Symm-Clashes |
|-----|-------|-------|----------|----------|---------|--------------|
| 1   | A     | 1850  | 0        | 1882     | 14      | 0            |
| 1   | B     | 1765  | 0        | 1813     | 3       | 0            |
| 1   | C     | 1859  | 0        | 1883     | 18      | 0            |
| 1   | D     | 1809  | 0        | 1862     | 3       | 0            |
| 2   | A     | 38    | 0        | 1        | 6       | 0            |
| 2   | B     | 42    | 0        | 1        | 4       | 0            |
| 2   | C     | 38    | 0        | 1        | 12      | 0            |
| 2   | D     | 42    | 0        | 1        | 3       | 0            |
| 3   | S     | 482   | 0        | 0        | 6       | 2            |
| All | All   | 7925  | 0        | 7444     | 49      | 2            |

The all-atom clashscore is defined as the number of clashes found per 1000 atoms (including hydrogen atoms). The all-atom clashscore for this structure is 3.

All (49) close contacts within the same asymmetric unit are listed below, sorted by their clash magnitude.

| Atom-1           | Atom-2           | Interatomic distance (Å) | Clash overlap (Å) |
|------------------|------------------|--------------------------|-------------------|
| 2:A:601:LIG:S32  | 2:A:601:LIG:C03  | 2.11                     | 1.39              |
| 2:B:601:LIG:S32  | 2:B:601:LIG:C03  | 2.11                     | 1.39              |
| 2:D:601:LIG:S32  | 2:D:601:LIG:C03  | 2.12                     | 1.38              |
| 2:C:601:LIG:C03  | 2:C:601:LIG:S32  | 2.10                     | 1.37              |
| 1:C:525:LEU:CB   | 2:C:601:LIG:C27  | 2.31                     | 1.08              |
| 1:C:328:TYR:N    | 3:S:13:HOH:O     | 2.03                     | 0.92              |
| 1:C:305:SER:N    | 3:S:172:HOH:O    | 2.04                     | 0.87              |
| 1:A:370:LEU:HD11 | 1:A:475:ILE:HD11 | 1.58                     | 0.86              |
| 1:A:328:TYR:N    | 3:S:6:HOH:O      | 2.11                     | 0.84              |
| 1:C:326:ILE:C    | 3:S:287:HOH:O    | 2.16                     | 0.82              |
| 2:B:601:LIG:S32  | 2:B:601:LIG:C02  | 2.68                     | 0.81              |
| 1:C:525:LEU:CB   | 2:C:601:LIG:C31  | 2.60                     | 0.80              |
| 1:C:525:LEU:CB   | 2:C:601:LIG:C26  | 2.60                     | 0.79              |
| 2:C:601:LIG:C04  | 2:C:601:LIG:S32  | 2.71                     | 0.79              |
| 2:A:601:LIG:S32  | 2:A:601:LIG:C02  | 2.72                     | 0.77              |
| 2:D:601:LIG:S32  | 2:D:601:LIG:C02  | 2.74                     | 0.76              |
| 2:B:601:LIG:S32  | 2:B:601:LIG:C04  | 2.75                     | 0.74              |
| 2:A:601:LIG:S32  | 2:A:601:LIG:C04  | 2.74                     | 0.74              |

*Continued on next page...*

Continued from previous page...

| Atom-1           | Atom-2           | Interatomic distance (Å) | Clash overlap (Å) |
|------------------|------------------|--------------------------|-------------------|
| 2:C:601:LIG:C02  | 2:C:601:LIG:S32  | 2.78                     | 0.72              |
| 1:A:523:GLU:O    | 1:A:525:LEU:C    | 2.30                     | 0.70              |
| 1:A:534:VAL:HG22 | 2:A:601:LIG:C31  | 2.22                     | 0.69              |
| 2:D:601:LIG:S32  | 2:D:601:LIG:C04  | 2.79                     | 0.63              |
| 1:A:465:THR:HG23 | 1:A:468:SER:H    | 1.63                     | 0.63              |
| 1:C:525:LEU:CB   | 2:C:601:LIG:C30  | 2.78                     | 0.62              |
| 1:A:523:GLU:O    | 1:A:525:LEU:N    | 2.33                     | 0.61              |
| 1:A:335:ARG:NH2  | 1:A:414:GLN:HE22 | 1.99                     | 0.60              |
| 1:C:533:VAL:CG2  | 2:C:601:LIG:C31  | 2.78                     | 0.60              |
| 1:C:539:LEU:HG   | 1:C:543:MET:HE3  | 1.85                     | 0.58              |
| 1:C:396:MET:O    | 1:C:436:ARG:HD3  | 2.07                     | 0.55              |
| 1:C:533:VAL:HG23 | 2:C:601:LIG:C31  | 2.37                     | 0.54              |
| 1:A:525:LEU:HD22 | 2:A:601:LIG:C27  | 2.38                     | 0.54              |
| 1:A:396:MET:O    | 1:A:436:ARG:HD3  | 2.08                     | 0.53              |
| 1:C:539:LEU:HD11 | 1:C:543:MET:HE2  | 1.91                     | 0.51              |
| 1:D:356:HIS:HE1  | 3:S:20:HOH:O     | 1.95                     | 0.49              |
| 1:C:525:LEU:CB   | 2:C:601:LIG:C28  | 2.90                     | 0.48              |
| 1:D:492:LYS:HE2  | 1:D:492:LYS:HA   | 1.96                     | 0.48              |
| 1:A:525:LEU:HD22 | 2:A:601:LIG:C30  | 2.44                     | 0.47              |
| 1:B:346:LEU:HD12 | 2:B:601:LIG:HC26 | 1.97                     | 0.47              |
| 1:A:523:GLU:O    | 1:A:524:HIS:C    | 2.54                     | 0.46              |
| 1:C:533:VAL:HG22 | 2:C:601:LIG:C31  | 2.46                     | 0.46              |
| 1:C:534:VAL:HG23 | 2:C:601:LIG:C31  | 2.45                     | 0.46              |
| 1:D:398:HIS:HB3  | 1:D:401:LYS:HE2  | 1.99                     | 0.44              |
| 1:A:519:ASN:HD21 | 1:B:516:HIS:HA   | 1.83                     | 0.43              |
| 1:A:454:LEU:HD22 | 1:A:475:ILE:HD12 | 2.00                     | 0.43              |
| 1:C:362:LYS:HD2  | 1:C:368:VAL:HG12 | 2.01                     | 0.42              |
| 1:B:358:ILE:CD1  | 1:B:379:LEU:HD13 | 2.49                     | 0.41              |
| 1:C:328:TYR:N    | 3:S:287:HOH:O    | 2.54                     | 0.41              |
| 1:A:520:LYS:HD2  | 1:A:520:LYS:HA   | 1.84                     | 0.41              |
| 1:C:374:ASP:OD2  | 1:C:471:GLU:OE1  | 2.39                     | 0.40              |

All (2) symmetry-related close contacts are listed below. The label for Atom-2 includes the symmetry operator and encoded unit-cell translations to be applied.

| Atom-1        | Atom-2               | Interatomic distance (Å) | Clash overlap (Å) |
|---------------|----------------------|--------------------------|-------------------|
| 3:S:399:HOH:O | 3:S:438:HOH:O[1_545] | 2.04                     | 0.16              |
| 3:S:435:HOH:O | 3:S:442:HOH:O[1_545] | 2.14                     | 0.06              |

### 5.3 Torsion angles [i](#)

#### 5.3.1 Protein backbone [i](#)

In the following table, the Percentiles column shows the percent Ramachandran outliers of the chain as a percentile score with respect to all X-ray entries followed by that with respect to entries of similar resolution.

The Analysed column shows the number of residues for which the backbone conformation was analysed, and the total number of residues.

| Mol | Chain | Analysed       | Favoured   | Allowed | Outliers | Percentiles |     |
|-----|-------|----------------|------------|---------|----------|-------------|-----|
| 1   | A     | 223/257 (87%)  | 219 (98%)  | 2 (1%)  | 2 (1%)   | 17          | 4   |
| 1   | B     | 212/257 (82%)  | 211 (100%) | 1 (0%)  | 0        | 100         | 100 |
| 1   | C     | 225/257 (88%)  | 222 (99%)  | 1 (0%)  | 2 (1%)   | 17          | 4   |
| 1   | D     | 220/257 (86%)  | 219 (100%) | 1 (0%)  | 0        | 100         | 100 |
| All | All   | 880/1028 (86%) | 871 (99%)  | 5 (1%)  | 4 (0%)   | 29          | 11  |

All (4) Ramachandran outliers are listed below:

| Mol | Chain | Res | Type |
|-----|-------|-----|------|
| 1   | C     | 464 | SER  |
| 1   | A     | 523 | GLU  |
| 1   | A     | 524 | HIS  |
| 1   | C     | 465 | THR  |

#### 5.3.2 Protein sidechains [i](#)

In the following table, the Percentiles column shows the percent sidechain outliers of the chain as a percentile score with respect to all X-ray entries followed by that with respect to entries of similar resolution.

The Analysed column shows the number of residues for which the sidechain conformation was analysed, and the total number of residues.

| Mol | Chain | Analysed      | Rotameric | Outliers | Percentiles |    |
|-----|-------|---------------|-----------|----------|-------------|----|
| 1   | A     | 207/232 (89%) | 205 (99%) | 2 (1%)   | 76          | 61 |
| 1   | B     | 198/232 (85%) | 195 (98%) | 3 (2%)   | 65          | 44 |
| 1   | C     | 208/232 (90%) | 205 (99%) | 3 (1%)   | 67          | 47 |
| 1   | D     | 204/232 (88%) | 199 (98%) | 5 (2%)   | 47          | 22 |
| All | All   | 817/928 (88%) | 804 (98%) | 13 (2%)  | 62          | 41 |

All (13) residues with a non-rotameric sidechain are listed below:

| Mol | Chain | Res | Type |
|-----|-------|-----|------|
| 1   | A     | 358 | ILE  |
| 1   | A     | 437 | MET  |
| 1   | B     | 396 | MET  |
| 1   | B     | 432 | SER  |
| 1   | B     | 534 | VAL  |
| 1   | C     | 358 | ILE  |
| 1   | C     | 417 | CYS  |
| 1   | C     | 437 | MET  |
| 1   | D     | 306 | LEU  |
| 1   | D     | 358 | ILE  |
| 1   | D     | 432 | SER  |
| 1   | D     | 492 | LYS  |
| 1   | D     | 544 | LEU  |

Some sidechains can be flipped to improve hydrogen bonding and reduce clashes. All (10) such sidechains are listed below:

| Mol | Chain | Res | Type |
|-----|-------|-----|------|
| 1   | A     | 398 | HIS  |
| 1   | A     | 413 | ASN  |
| 1   | A     | 500 | GLN  |
| 1   | A     | 513 | HIS  |
| 1   | A     | 519 | ASN  |
| 1   | B     | 304 | ASN  |
| 1   | B     | 519 | ASN  |
| 1   | C     | 519 | ASN  |
| 1   | D     | 356 | HIS  |
| 1   | D     | 519 | ASN  |

### 5.3.3 RNA [i](#)

There are no RNA molecules in this entry.

### 5.4 Non-standard residues in protein, DNA, RNA chains [i](#)

There are no non-standard protein/DNA/RNA residues in this entry.

### 5.5 Carbohydrates [i](#)

There are no monosaccharides in this entry.



## 5.6 Ligand geometry

Of 4 ligands modelled in this entry, 4 could not be matched to an existing wwPDB Chemical Component Dictionary definition at this stage - leaving 0 for Mogul analysis.

There are no bond length outliers.

There are no bond angle outliers.

There are no chirality outliers.

There are no torsion outliers.

There are no ring outliers.

No monomer is involved in short contacts.

The following is a two-dimensional graphical depiction of Mogul quality analysis of bond lengths, bond angles, torsion angles, and ring geometry for all instances of the Ligand of Interest. In addition, ligands with molecular weight > 250 and outliers as shown on the validation Tables will also be included. For torsion angles, if less than 5% of the Mogul distribution of torsion angles is within 10 degrees of the torsion angle in question, then that torsion angle is considered an outlier. Any bond that is central to one or more torsion angles identified as an outlier by Mogul will be highlighted in the graph. For rings, the root-mean-square deviation (RMSD) between the ring in question and similar rings identified by Mogul is calculated over all ring torsion angles. If the average RMSD is greater than 60 degrees and the minimal RMSD between the ring in question and any Mogul-identified rings is also greater than 60 degrees, then that ring is considered an outlier. The outliers are highlighted in purple. The color gray indicates Mogul did not find sufficient equivalents in the CSD to analyse the geometry.

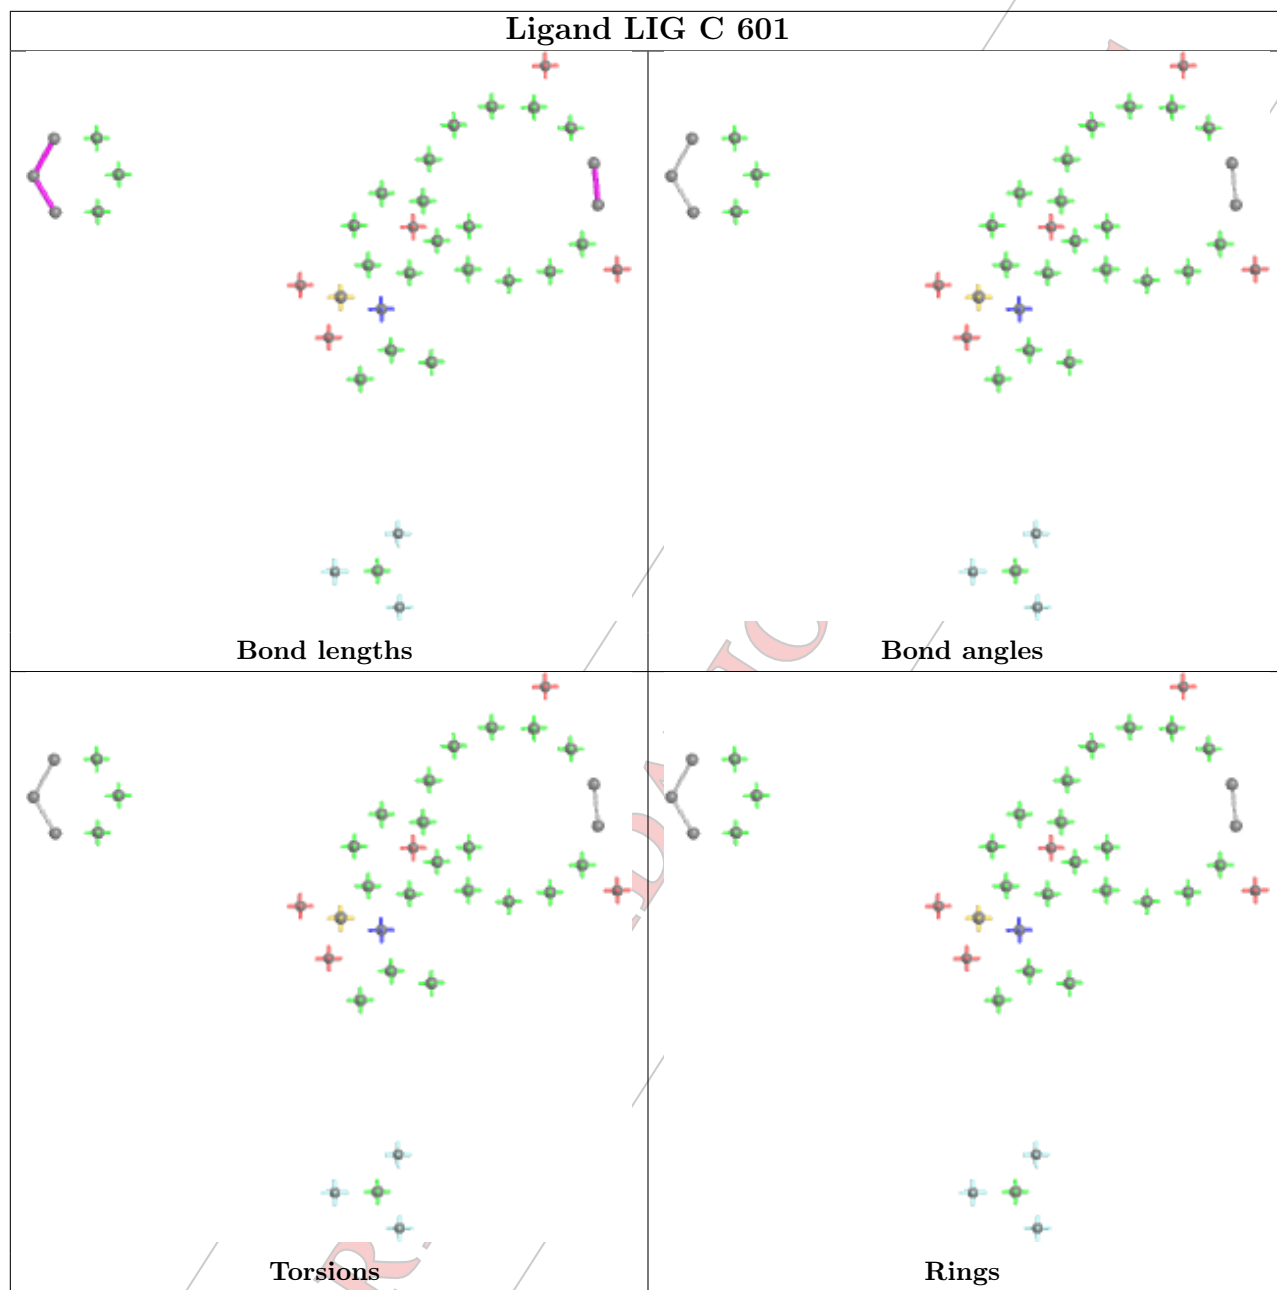

PRELIMINARY

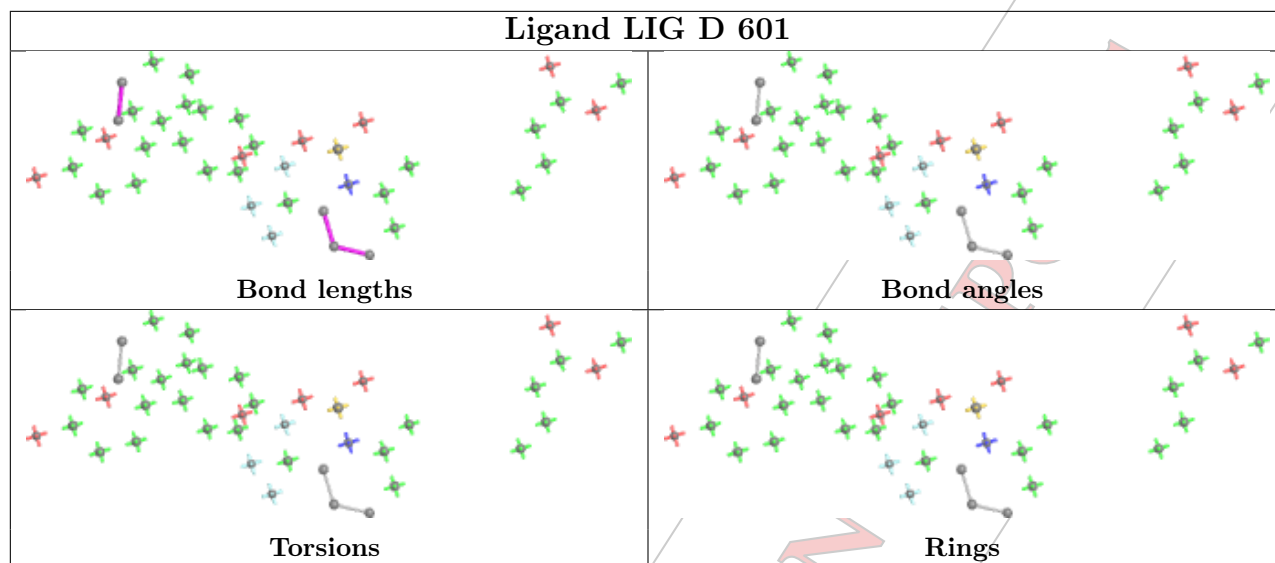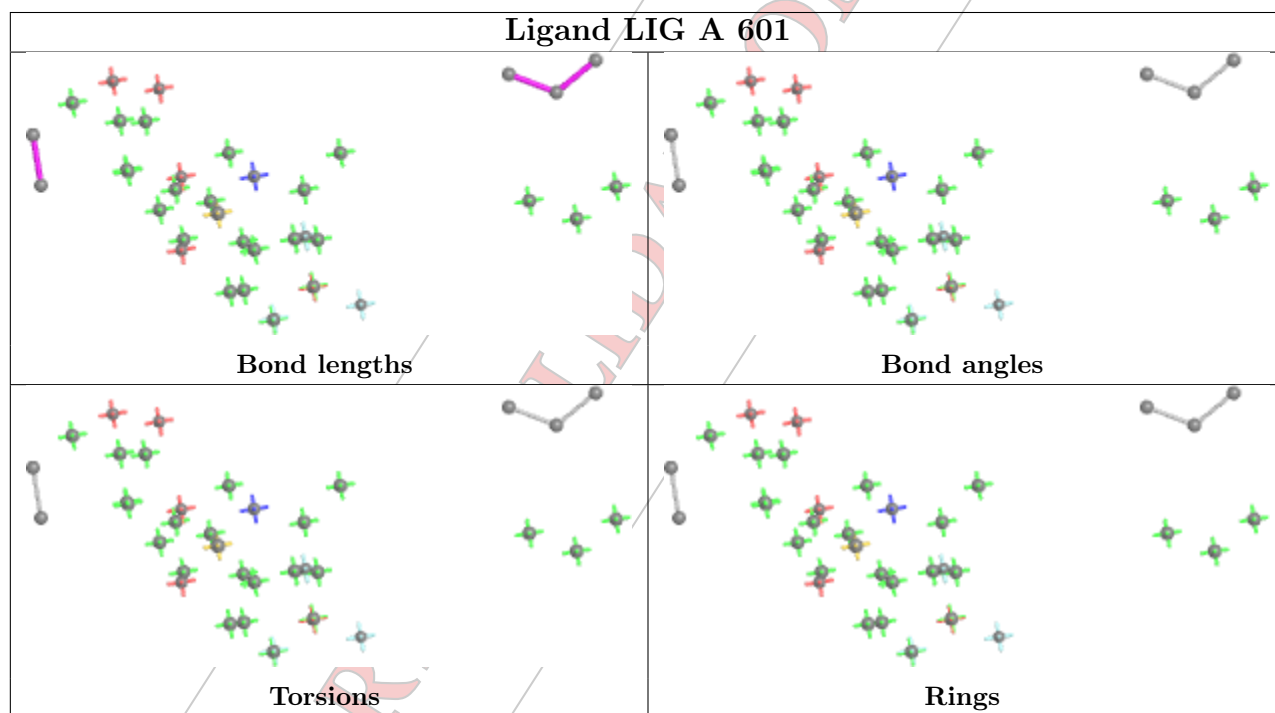

PRELIMINARY

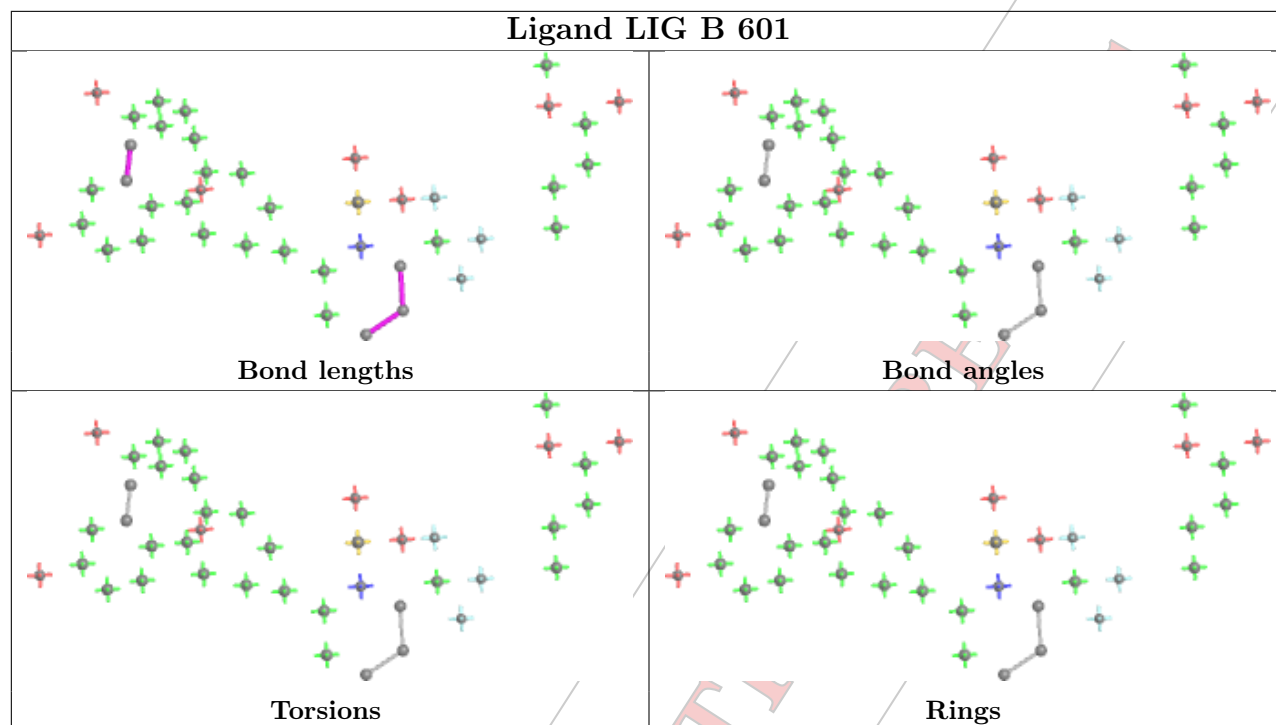

### 5.7 Other polymers [i](#)

There are no such residues in this entry.

### 5.8 Polymer linkage issues [i](#)

There are no chain breaks in this entry.

## 6 Fit of model and data [i](#)

### 6.1 Protein, DNA and RNA chains [i](#)

In the following table, the column labelled '#RSRZ > 2' contains the number (and percentage) of RSRZ outliers, followed by percent RSRZ outliers for the chain as percentile scores relative to all X-ray entries and entries of similar resolution. The OWAB column contains the minimum, median, 95<sup>th</sup> percentile and maximum values of the occupancy-weighted average B-factor per residue. The column labelled 'Q < 0.9' lists the number of (and percentage) of residues with an average occupancy less than 0.9.

| Mol | Chain | Analysed       | <RSRZ> | #RSRZ>2       | OWAB(Å <sup>2</sup> ) | Q<0.9 |
|-----|-------|----------------|--------|---------------|-----------------------|-------|
| 1   | A     | 230/257 (89%)  | 0.04   | 7 (3%) 50 48  | 15, 28, 54, 72        | 0     |
| 1   | B     | 220/257 (85%)  | 0.09   | 10 (4%) 33 30 | 17, 28, 63, 106       | 0     |
| 1   | C     | 232/257 (90%)  | 0.26   | 17 (7%) 15 13 | 16, 35, 65, 98        | 0     |
| 1   | D     | 226/257 (87%)  | 0.09   | 14 (6%) 20 18 | 17, 31, 66, 83        | 0     |
| All | All   | 908/1028 (88%) | 0.12   | 48 (5%) 26 24 | 15, 30, 64, 106       | 0     |

All (48) RSRZ outliers are listed below:

| Mol | Chain | Res | Type | RSRZ |
|-----|-------|-----|------|------|
| 1   | C     | 417 | CYS  | 6.0  |
| 1   | B     | 469 | LEU  | 5.7  |
| 1   | D     | 528 | MET  | 5.2  |
| 1   | C     | 464 | SER  | 4.7  |
| 1   | D     | 530 | CYS  | 4.6  |
| 1   | C     | 305 | SER  | 4.5  |
| 1   | B     | 304 | ASN  | 4.4  |
| 1   | B     | 468 | SER  | 4.3  |
| 1   | B     | 530 | CYS  | 4.2  |
| 1   | A     | 524 | HIS  | 4.2  |
| 1   | B     | 461 | PHE  | 4.1  |
| 1   | A     | 332 | ASP  | 3.9  |
| 1   | C     | 332 | ASP  | 3.9  |
| 1   | D     | 462 | LEU  | 3.8  |
| 1   | D     | 306 | LEU  | 3.6  |
| 1   | A     | 418 | VAL  | 3.6  |
| 1   | C     | 306 | LEU  | 3.5  |
| 1   | C     | 463 | SER  | 3.5  |
| 1   | C     | 466 | LEU  | 3.4  |
| 1   | C     | 420 | GLY  | 3.4  |
| 1   | A     | 461 | PHE  | 3.4  |

*Continued on next page...*

Continued from previous page...

| Mol | Chain | Res | Type | RSRZ |
|-----|-------|-----|------|------|
| 1   | C     | 418 | VAL  | 3.4  |
| 1   | B     | 305 | SER  | 3.4  |
| 1   | D     | 526 | TYR  | 3.1  |
| 1   | D     | 425 | PHE  | 3.0  |
| 1   | C     | 425 | PHE  | 3.0  |
| 1   | A     | 305 | SER  | 3.0  |
| 1   | A     | 460 | THR  | 2.7  |
| 1   | B     | 460 | THR  | 2.7  |
| 1   | D     | 527 | SER  | 2.6  |
| 1   | B     | 532 | ASN  | 2.6  |
| 1   | D     | 532 | ASN  | 2.6  |
| 1   | C     | 413 | ASN  | 2.4  |
| 1   | B     | 413 | ASN  | 2.4  |
| 1   | C     | 331 | TYR  | 2.4  |
| 1   | D     | 328 | TYR  | 2.4  |
| 1   | D     | 546 | ALA  | 2.3  |
| 1   | B     | 306 | LEU  | 2.3  |
| 1   | A     | 417 | CYS  | 2.3  |
| 1   | D     | 545 | ASP  | 2.3  |
| 1   | C     | 536 | SER  | 2.2  |
| 1   | D     | 415 | GLY  | 2.2  |
| 1   | C     | 461 | PHE  | 2.2  |
| 1   | D     | 463 | SER  | 2.1  |
| 1   | C     | 421 | MET  | 2.1  |
| 1   | C     | 419 | GLU  | 2.1  |
| 1   | D     | 421 | MET  | 2.0  |
| 1   | C     | 494 | GLY  | 2.0  |

## 6.2 Non-standard residues in protein, DNA, RNA chains [i](#)

There are no non-standard protein/DNA/RNA residues in this entry.

## 6.3 Carbohydrates [i](#)

There are no monosaccharides in this entry.

## 6.4 Ligands [i](#)

In the following table, the Atoms column lists the number of modelled atoms in the group and the number defined in the chemical component dictionary. The B-factors column lists the minimum,

median, 95<sup>th</sup> percentile and maximum values of B factors of atoms in the group. The column labelled 'Q < 0.9' lists the number of atoms with occupancy less than 0.9.

| Mol | Type | Chain | Res | Atoms | RSCC | RSR  | B-factors(Å <sup>2</sup> ) | Q < 0.9 |
|-----|------|-------|-----|-------|------|------|----------------------------|---------|
| 2   | LIG  | C     | 601 | 38/?  | 0.89 | 0.14 | 17,31,70,85                | 0       |
| 2   | LIG  | D     | 601 | 42/?  | 0.89 | 0.14 | 23,44,106,128              | 0       |
| 2   | LIG  | A     | 601 | 38/?  | 0.89 | 0.15 | 18,28,83,88                | 0       |
| 2   | LIG  | B     | 601 | 42/?  | 0.90 | 0.15 | 21,43,77,82                | 0       |

The following is a graphical depiction of the model fit to experimental electron density of all instances of the Ligand of Interest. In addition, ligands with molecular weight > 250 and outliers as shown on the geometry validation Tables will also be included. Each fit is shown from different orientation to approximate a three-dimensional view.

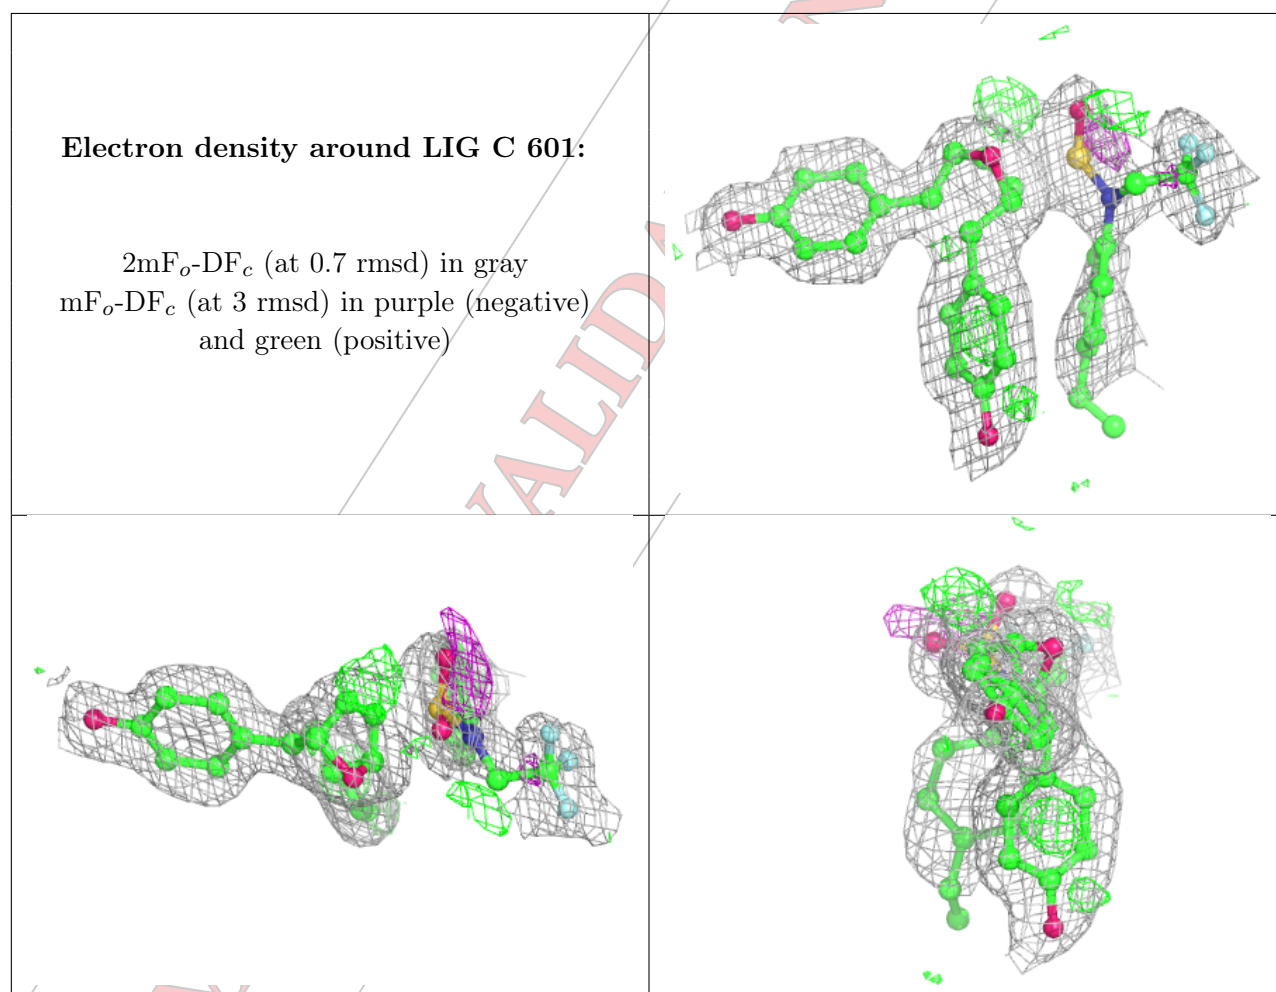

**Electron density around LIG D 601:**

$2mF_o-DF_c$  (at 0.7 rmsd) in gray  
 $mF_o-DF_c$  (at 3 rmsd) in purple (negative)  
and green (positive)

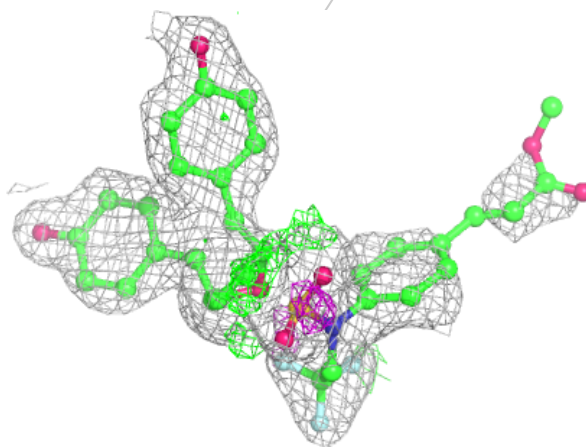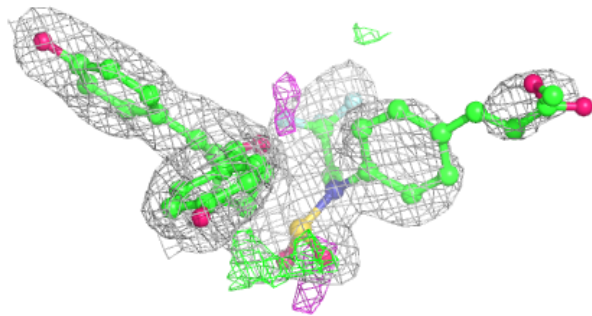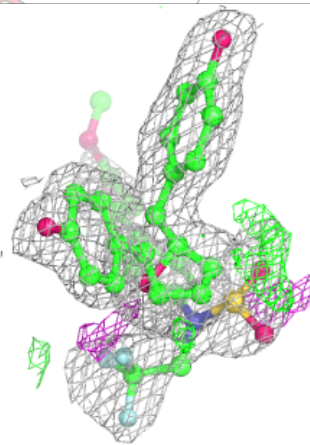

PRELIMINARY VALIDATION



**Electron density around LIG A 601:**

$2mF_o-DF_c$  (at 0.7 rmsd) in gray  
 $mF_o-DF_c$  (at 3 rmsd) in purple (negative)  
and green (positive)

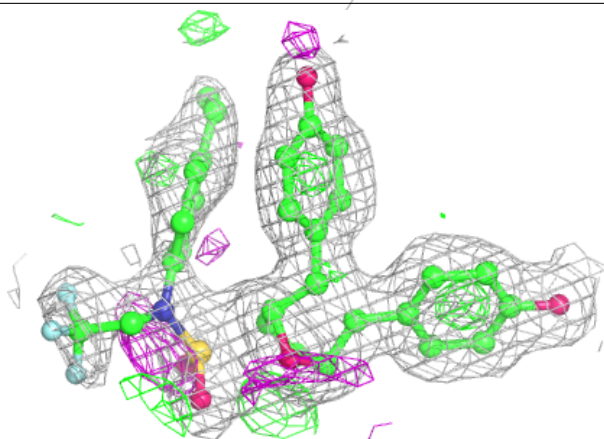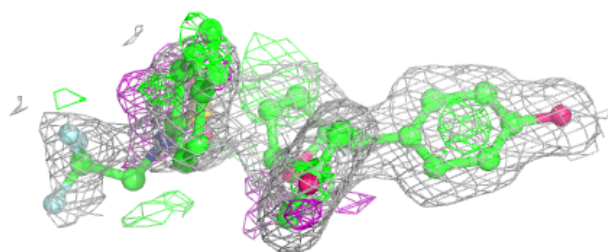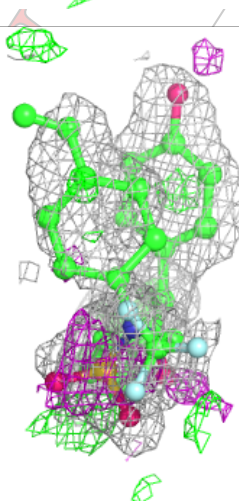

PRELIMINARY VALIDATION

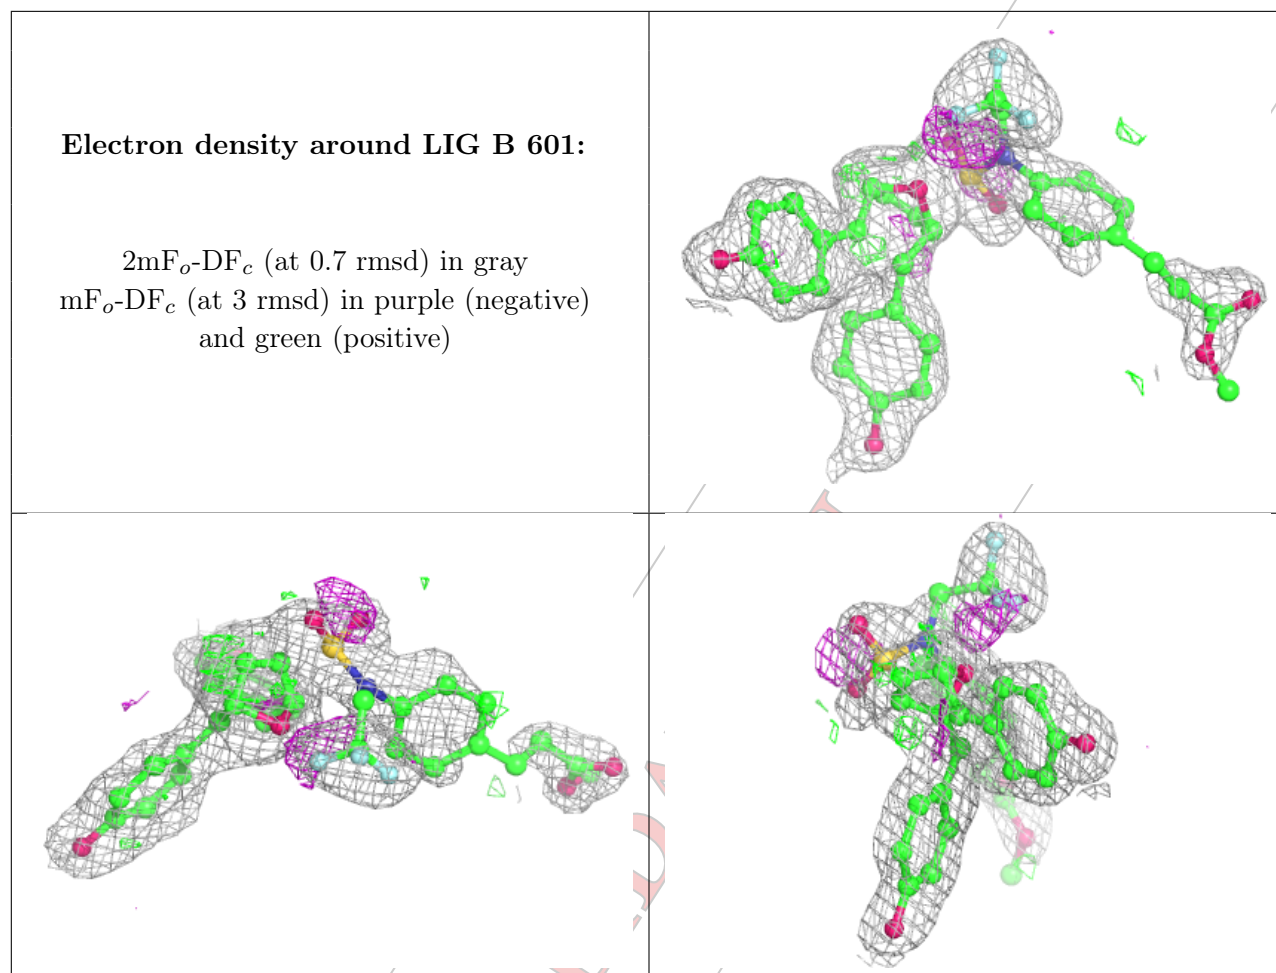

## 6.5 Other polymers [i](#)

There are no such residues in this entry.

PRELIMINARY VALIDATION



# Preliminary Full wwPDB X-ray Structure Validation Report ⓘ

Aug 9, 2020 – 10:26 PM EDT

Deposition ID : D\_1000251219

This is a Preliminary Full wwPDB X-ray Structure Validation Report.

This report is produced by the wwPDB Deposition System during initial deposition but before annotation of the structure.

We welcome your comments at [validation@mail.wwpdb.org](mailto:validation@mail.wwpdb.org)

A user guide is available at

<https://www.wwpdb.org/validation/2017/XrayValidationReportHelp>

with specific help available everywhere you see the ⓘ symbol.

---

The following versions of software and data (see [references ⓘ](#)) were used in the production of this report:

|                                |   |                                                                    |
|--------------------------------|---|--------------------------------------------------------------------|
| MolProbity                     | : | 4.02b-467                                                          |
| Mogul                          | : | 1.8.5 (274361), CSD as541be (2020)                                 |
| Xtriage (Phenix)               | : | 1.13                                                               |
| EDS                            | : | 2.13.1                                                             |
| buster-report                  | : | 1.1.7 (2018)                                                       |
| Percentile statistics          | : | 20191225.v01 (using entries in the PDB archive December 25th 2019) |
| Refmac                         | : | 5.8.0158                                                           |
| CCP4                           | : | 7.0.044 (Gargrove)                                                 |
| Ideal geometry (proteins)      | : | Engh & Huber (2001)                                                |
| Ideal geometry (DNA, RNA)      | : | Parkinson et al. (1996)                                            |
| Validation Pipeline (wwPDB-VP) | : | 2.13.1                                                             |

# 1 Overall quality at a glance i

The following experimental techniques were used to determine the structure:  
*X-RAY DIFFRACTION*

The reported resolution of this entry is 1.72 Å.

Percentile scores (ranging between 0-100) for global validation metrics of the entry are shown in the following graphic. The table shows the number of entries on which the scores are based.

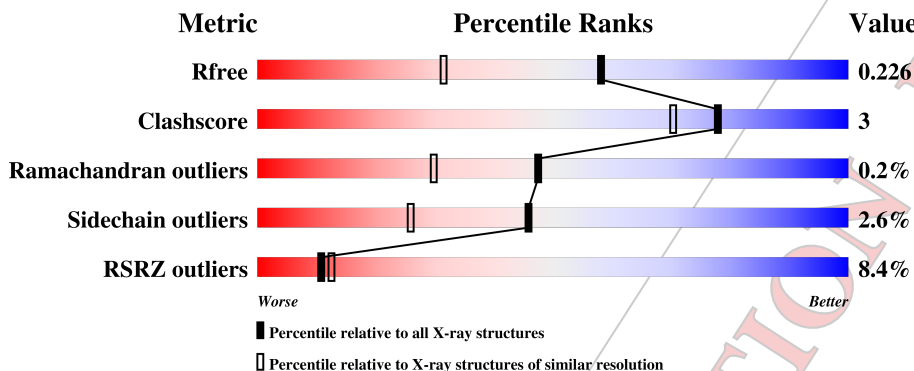

| Metric                | Whole archive<br>(#Entries) | Similar resolution<br>(#Entries, resolution range(Å)) |
|-----------------------|-----------------------------|-------------------------------------------------------|
| $R_{free}$            | 130704                      | 5722 (1.74-1.70)                                      |
| Clashscore            | 141614                      | 6152 (1.74-1.70)                                      |
| Ramachandran outliers | 138981                      | 6051 (1.74-1.70)                                      |
| Sidechain outliers    | 138945                      | 6051 (1.74-1.70)                                      |
| RSRZ outliers         | 127900                      | 5629 (1.74-1.70)                                      |

The table below summarises the geometric issues observed across the polymeric chains and their fit to the electron density. The red, orange, yellow and green segments on the lower bar indicate the fraction of residues that contain outliers for  $\geq 3$ , 2, 1 and 0 types of geometric quality criteria respectively. A grey segment represents the fraction of residues that are not modelled. The numeric value for each fraction is indicated below the corresponding segment, with a dot representing fractions  $\leq 5\%$ . The upper red bar (where present) indicates the fraction of residues that have poor fit to the electron density. The numeric value is given above the bar.

| Mol | Chain | Length | Quality of chain    |
|-----|-------|--------|---------------------|
| 1   | A     | 260    | <br>7% 87% 6% • 6%  |
| 1   | B     | 260    | <br>5% 84% • 12%    |
| 1   | C     | 260    | <br>12% 88% 6% • 5% |
| 1   | D     | 260    | <br>7% 84% 6% 10%   |

## 2 Entry composition i

There are 3 unique types of molecules in this entry. The entry contains 8127 atoms, of which 0 are hydrogens and 0 are deuteriums.

In the tables below, the ZeroOcc column contains the number of atoms modelled with zero occupancy, the AltConf column contains the number of residues with at least one atom in alternate conformation and the Trace column contains the number of residues modelled with at most 2 atoms.

- Molecule 1 is a protein called Estrogen Receptor.

| Mol | Chain | Residues | Atoms         |           |          |          |         | ZeroOcc | AltConf | Trace |
|-----|-------|----------|---------------|-----------|----------|----------|---------|---------|---------|-------|
|     |       |          | Total         | C         | N        | O        | S       |         |         |       |
| 1   | A     | 245      | Total<br>1962 | C<br>1252 | N<br>335 | O<br>358 | S<br>17 | 0       | 1       | 0     |
| 1   | B     | 230      | Total<br>1842 | C<br>1178 | N<br>314 | O<br>331 | S<br>19 | 0       | 0       | 0     |
| 1   | C     | 247      | Total<br>1965 | C<br>1252 | N<br>337 | O<br>360 | S<br>16 | 0       | 1       | 0     |
| 1   | D     | 234      | Total<br>1865 | C<br>1191 | N<br>318 | O<br>337 | S<br>19 | 0       | 0       | 0     |

- Molecule 2 is a ligand with the chemical component id LIG but its atom names do not match the existing wwPDB Chemical Component Dictionary definition for LIG. Consequently no firm identification of ligand chemistry can be made. Once the structure is annotated then an identification and diagram will be given here.

| Mol | Chain | Residues | Atoms       |         |        |        |        | ZeroOcc | AltConf |   |
|-----|-------|----------|-------------|---------|--------|--------|--------|---------|---------|---|
|     |       |          | Total       | C       | N      | O      | S      |         |         |   |
| 2   | E     | 1        | Total<br>33 | C<br>26 | N<br>1 | O<br>5 | S<br>1 | 0       | 0       |   |
| 2   | E     | 1        | Total<br>41 | C<br>29 | F<br>3 | N<br>1 | O<br>7 | S<br>1  | 0       | 0 |
| 2   | E     | 1        | Total<br>33 | C<br>26 | N<br>1 | O<br>5 | S<br>1 | 0       | 0       |   |
| 2   | E     | 1        | Total<br>41 | C<br>29 | F<br>3 | N<br>1 | O<br>7 | S<br>1  | 0       | 0 |

- Molecule 3 is water.

| Mol | Chain | Residues | Atoms        |          | ZeroOcc | AltConf |
|-----|-------|----------|--------------|----------|---------|---------|
| 3   | S     | 345      | Total<br>345 | O<br>345 | 0       | 0       |

### 3 Residue-property plots [i](#)

These plots are drawn for all protein, RNA, DNA and oligosaccharide chains in the entry. The first graphic for a chain summarises the proportions of the various outlier classes displayed in the second graphic. The second graphic shows the sequence view annotated by issues in geometry and electron density. Residues are color-coded according to the number of geometric quality criteria for which they contain at least one outlier: green = 0, yellow = 1, orange = 2 and red = 3 or more. A red dot above a residue indicates a poor fit to the electron density ( $RSRZ > 2$ ). Stretches of 2 or more consecutive residues without any outlier are shown as a green connector. Residues present in the sample, but not in the model, are shown in grey.

- Molecule 1: Estrogen Receptor

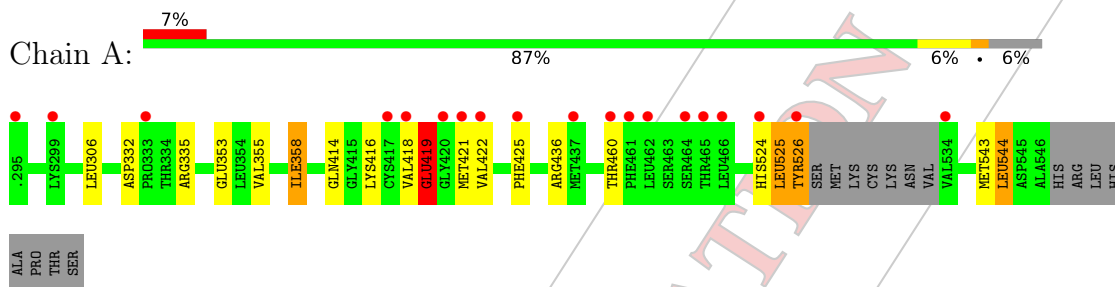

- Molecule 1: Estrogen Receptor

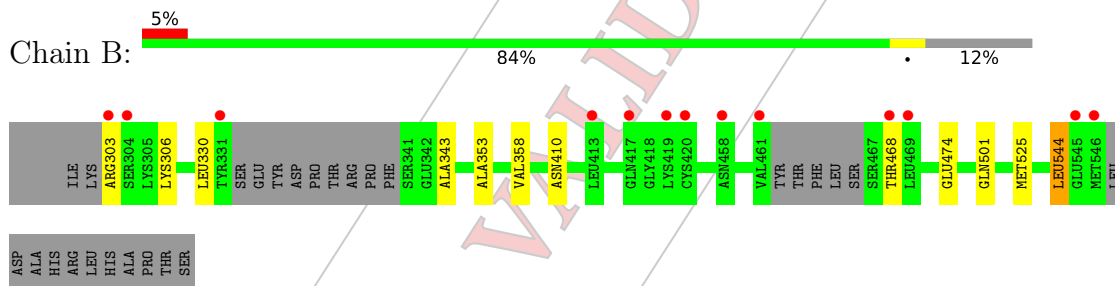

- Molecule 1: Estrogen Receptor

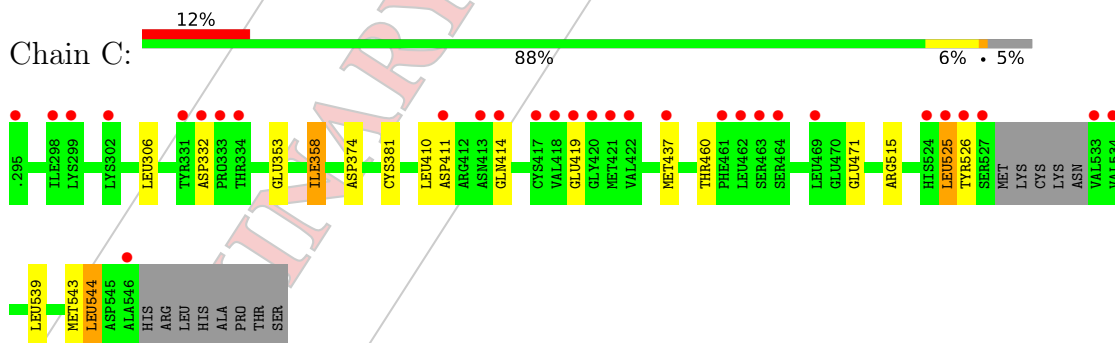

- Molecule 1: Estrogen Receptor

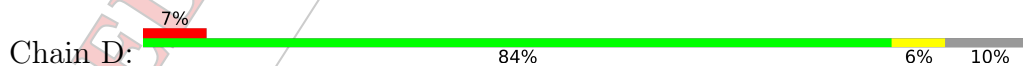

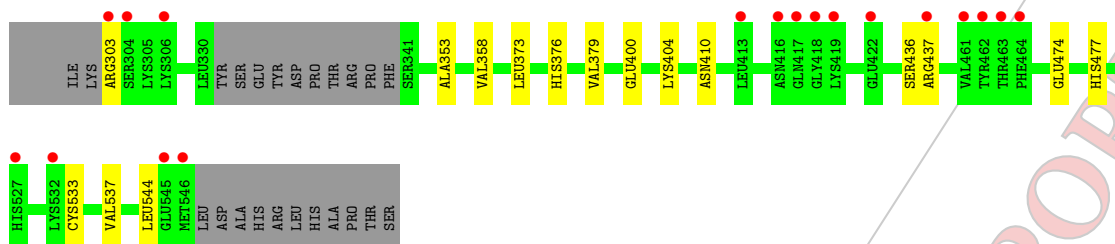

PRELIMINARY VALIDATION REPORT

## 4 Data and refinement statistics i

| Property                                                                | Value                                                       | Source           |
|-------------------------------------------------------------------------|-------------------------------------------------------------|------------------|
| Space group                                                             | P 1                                                         | Depositor        |
| Cell constants<br>a, b, c, $\alpha$ , $\beta$ , $\gamma$                | 53.86Å 58.76Å 93.70Å<br>86.45° 75.11° 62.82°                | Depositor        |
| Resolution (Å)                                                          | 90.36 – 1.72<br>90.36 – 1.72                                | Depositor<br>EDS |
| % Data completeness<br>(in resolution range)                            | 72.8 (90.36-1.72)<br>72.8 (90.36-1.72)                      | Depositor<br>EDS |
| $R_{merge}$                                                             | (Not available)                                             | Depositor        |
| $R_{sym}$                                                               | (Not available)                                             | Depositor        |
| $\langle I/\sigma(I) \rangle$ <sup>1</sup>                              | 1.55 (at 1.72Å)                                             | Xtrriage         |
| Refinement program                                                      | REFMAC 5.8.0253                                             | Depositor        |
| R, $R_{free}$                                                           | 0.194 , 0.221<br>0.203 , 0.226                              | Depositor<br>DCC |
| $R_{free}$ test set                                                     | 3761 reflections (4.96%)                                    | wwPDB-VP         |
| Wilson B-factor (Å <sup>2</sup> )                                       | 23.5                                                        | Xtrriage         |
| Anisotropy                                                              | 0.015                                                       | Xtrriage         |
| Bulk solvent $k_{sol}$ (e/Å <sup>3</sup> ), $B_{sol}$ (Å <sup>2</sup> ) | 0.37 , 47.1                                                 | EDS              |
| L-test for twinning <sup>2</sup>                                        | $\langle  L  \rangle = 0.50$ , $\langle L^2 \rangle = 0.33$ | Xtrriage         |
| Estimated twinning fraction                                             | 0.107 for h,h-k,h-l                                         | Xtrriage         |
| $F_o, F_c$ correlation                                                  | 0.94                                                        | EDS              |
| Total number of atoms                                                   | 8127                                                        | wwPDB-VP         |
| Average B, all atoms (Å <sup>2</sup> )                                  | 32.0                                                        | wwPDB-VP         |

Xtrriage's analysis on translational NCS is as follows: *The largest off-origin peak in the Patterson function is 6.71% of the height of the origin peak. No significant pseudotranslation is detected.*

<sup>1</sup>Intensities estimated from amplitudes.

<sup>2</sup>Theoretical values of  $\langle |L| \rangle$ ,  $\langle L^2 \rangle$  for acentric reflections are 0.5, 0.333 respectively for untwinned datasets, and 0.375, 0.2 for perfectly twinned datasets.



## 5 Model quality [i](#)

### 5.1 Standard geometry [i](#)

Bond lengths and bond angles in the following residue types are not validated in this section: LIG, YCM

The Z score for a bond length (or angle) is the number of standard deviations the observed value is removed from the expected value. A bond length (or angle) with  $|Z| > 5$  is considered an outlier worth inspection. RMSZ is the root-mean-square of all Z scores of the bond lengths (or angles).

| Mol | Chain | Bond lengths |         | Bond angles |         |
|-----|-------|--------------|---------|-------------|---------|
|     |       | RMSZ         | # Z  >5 | RMSZ        | # Z  >5 |
| 1   | A     | 0.71         | 0/1986  | 0.73        | 0/2680  |
| 1   | B     | 0.69         | 0/1851  | 0.76        | 0/2492  |
| 1   | C     | 0.70         | 0/1989  | 0.73        | 0/2684  |
| 1   | D     | 0.70         | 0/1874  | 0.76        | 0/2525  |
| All | All   | 0.70         | 0/7700  | 0.74        | 0/10381 |

Chiral center outliers are detected by calculating the chiral volume of a chiral center and verifying if the center is modelled as a planar moiety or with the opposite hand. A planarity outlier is detected by checking planarity of atoms in a peptide group, atoms in a mainchain group or atoms of a sidechain that are expected to be planar.

| Mol | Chain | #Chirality outliers | #Planarity outliers |
|-----|-------|---------------------|---------------------|
| 1   | A     | 0                   | 1                   |
| 1   | C     | 0                   | 1                   |
| All | All   | 0                   | 2                   |

There are no bond length outliers.

There are no bond angle outliers.

There are no chirality outliers.

All (2) planarity outliers are listed below:

| Mol | Chain | Res | Type | Group   |
|-----|-------|-----|------|---------|
| 1   | A     | 460 | THR  | Peptide |
| 1   | C     | 460 | THR  | Peptide |

## 5.2 Too-close contacts [i](#)

In the following table, the Non-H and H(model) columns list the number of non-hydrogen atoms and hydrogen atoms in the chain respectively. The H(added) column lists the number of hydrogen atoms added and optimized by MolProbity. The Clashes column lists the number of clashes within the asymmetric unit, whereas Symm-Clashes lists symmetry related clashes.

| Mol | Chain | Non-H | H(model) | H(added) | Clashes | Symm-Clashes |
|-----|-------|-------|----------|----------|---------|--------------|
| 1   | A     | 1962  | 0        | 2006     | 19      | 0            |
| 1   | B     | 1842  | 0        | 1889     | 5       | 1            |
| 1   | C     | 1965  | 0        | 2001     | 9       | 0            |
| 1   | D     | 1865  | 0        | 1920     | 12      | 0            |
| 2   | E     | 148   | 0        | 4        | 8       | 0            |
| 3   | S     | 345   | 0        | 0        | 4       | 1            |
| All | All   | 8127  | 0        | 7820     | 45      | 1            |

The all-atom clashscore is defined as the number of clashes found per 1000 atoms (including hydrogen atoms). The all-atom clashscore for this structure is 3.

All (45) close contacts within the same asymmetric unit are listed below, sorted by their clash magnitude.

| Atom-1           | Atom-2           | Interatomic distance (Å) | Clash overlap (Å) |
|------------------|------------------|--------------------------|-------------------|
| 1:D:533:VAL:HG11 | 2:E:4:LIG:O21    | 1.78                     | 0.82              |
| 1:D:533:VAL:CG1  | 2:E:4:LIG:O21    | 2.34                     | 0.74              |
| 1:A:416:LYS:HG2  | 1:A:422:VAL:HG21 | 1.69                     | 0.73              |
| 1:C:411:ASP:H    | 1:C:414:GLN:HE21 | 1.35                     | 0.73              |
| 1:A:525:LEU:HD12 | 2:E:1:LIG:C27    | 2.24                     | 0.67              |
| 1:A:355:VAL:HA   | 1:A:543:MET:CE   | 2.26                     | 0.66              |
| 1:C:525:LEU:HD13 | 1:C:526:TYR:N    | 2.13                     | 0.64              |
| 1:A:525:LEU:CD2  | 1:A:525:LEU:C    | 2.71                     | 0.59              |
| 1:A:525:LEU:HD12 | 2:E:1:LIG:C30    | 2.32                     | 0.58              |
| 1:D:400:GLY:O    | 3:S:208:HOH:O    | 2.17                     | 0.58              |
| 1:D:477:ARG:NH2  | 3:S:94:HOH:O     | 2.37                     | 0.57              |
| 1:A:526:TYR:CD1  | 1:A:526:TYR:C    | 2.82                     | 0.53              |
| 1:A:355:VAL:HA   | 1:A:543:MET:HE2  | 1.89                     | 0.52              |
| 1:A:335:ARG:NH1  | 1:A:414:GLN:HE22 | 2.06                     | 0.52              |
| 1:A:525:LEU:HD23 | 1:A:525:LEU:C    | 2.30                     | 0.52              |
| 1:A:525:LEU:HD23 | 1:A:525:LEU:O    | 2.10                     | 0.52              |
| 1:C:525:LEU:C    | 1:C:525:LEU:HD13 | 2.31                     | 0.51              |
| 1:D:353:GLU:OE1  | 2:E:4:LIG:O20    | 2.29                     | 0.51              |
| 1:B:353:GLU:OE1  | 2:E:2:LIG:O20    | 2.29                     | 0.50              |
| 1:D:373:HIS:HD2  | 1:D:537:TYR:OH   | 1.94                     | 0.50              |
| 1:C:381:YCM:HD3  | 3:S:171:HOH:O    | 2.12                     | 0.50              |

*Continued on next page...*

Continued from previous page...

| Atom-1           | Atom-2           | Interatomic distance (Å) | Clash overlap (Å) |
|------------------|------------------|--------------------------|-------------------|
| 1:D:376:VAL:HG22 | 1:D:544:LEU:HD12 | 1.94                     | 0.50              |
| 1:A:525:LEU:HD22 | 1:A:526:TYR:CD2  | 2.48                     | 0.49              |
| 1:C:410:LEU:HA   | 1:C:414:GLN:NE2  | 2.28                     | 0.49              |
| 1:B:358:ILE:HG23 | 1:B:544:LEU:HD13 | 1.95                     | 0.48              |
| 1:A:353:GLU:OE1  | 2:E:1:LIG:O20    | 2.31                     | 0.47              |
| 1:D:477:ARG:NH2  | 3:S:83:HOH:O     | 2.47                     | 0.47              |
| 1:B:410:LEU:N    | 1:B:410:LEU:HD12 | 2.30                     | 0.46              |
| 1:A:306:LEU:HD22 | 1:A:306:LEU:N    | 2.32                     | 0.45              |
| 1:C:539:LEU:HG   | 1:C:543:MET:CE   | 2.46                     | 0.45              |
| 1:C:353:GLU:OE1  | 2:E:3:LIG:O20    | 2.34                     | 0.45              |
| 1:A:526:TYR:HD1  | 1:A:526:TYR:C    | 2.20                     | 0.44              |
| 1:D:404:PHE:CE2  | 1:D:410:LEU:HD12 | 2.52                     | 0.44              |
| 1:D:376:VAL:CG2  | 1:D:544:LEU:HD12 | 2.48                     | 0.43              |
| 1:A:418:VAL:HG11 | 1:A:421:MET:CE   | 2.48                     | 0.43              |
| 1:A:525:LEU:HD22 | 1:A:526:TYR:HB3  | 2.00                     | 0.43              |
| 1:C:358:ILE:HG23 | 1:C:544:LEU:HD13 | 2.00                     | 0.43              |
| 1:A:358:ILE:HG23 | 1:A:544:LEU:HD13 | 2.00                     | 0.42              |
| 1:B:303:LYS:HG3  | 1:B:474:HIS:ND1  | 2.34                     | 0.42              |
| 1:A:416:LYS:HA   | 1:A:422:VAL:CG2  | 2.50                     | 0.42              |
| 1:A:418:VAL:HG12 | 1:A:419:GLU:HG2  | 2.01                     | 0.42              |
| 1:B:343:MET:HE1  | 1:B:525:LEU:CD2  | 2.52                     | 0.41              |
| 1:C:374:ASP:OD2  | 1:C:471:GLU:OE1  | 2.39                     | 0.41              |
| 1:D:358:ILE:HD12 | 1:D:379:LEU:HD13 | 2.04                     | 0.40              |
| 1:D:303:LYS:HG3  | 1:D:474:HIS:ND1  | 2.37                     | 0.40              |

All (1) symmetry-related close contacts are listed below. The label for Atom-2 includes the symmetry operator and encoded unit-cell translations to be applied.

| Atom-1          | Atom-2               | Interatomic distance (Å) | Clash overlap (Å) |
|-----------------|----------------------|--------------------------|-------------------|
| 1:B:330:GLU:OE2 | 3:S:275:HOH:O[1_545] | 2.10                     | 0.10              |

## 5.3 Torsion angles [i](#)

### 5.3.1 Protein backbone [i](#)

In the following table, the Percentiles column shows the percent Ramachandran outliers of the chain as a percentile score with respect to all X-ray entries followed by that with respect to entries of similar resolution.

The Analysed column shows the number of residues for which the backbone conformation was

analysed, and the total number of residues.

| Mol | Chain | Analysed       | Favoured  | Allowed | Outliers | Percentiles |     |
|-----|-------|----------------|-----------|---------|----------|-------------|-----|
| 1   | A     | 241/260 (93%)  | 238 (99%) | 2 (1%)  | 1 (0%)   | 34          | 18  |
| 1   | B     | 222/260 (85%)  | 219 (99%) | 3 (1%)  | 0        | 100         | 100 |
| 1   | C     | 243/260 (94%)  | 240 (99%) | 2 (1%)  | 1 (0%)   | 34          | 18  |
| 1   | D     | 228/260 (88%)  | 225 (99%) | 3 (1%)  | 0        | 100         | 100 |
| All | All   | 934/1040 (90%) | 922 (99%) | 10 (1%) | 2 (0%)   | 47          | 30  |

All (2) Ramachandran outliers are listed below:

| Mol | Chain | Res | Type |
|-----|-------|-----|------|
| 1   | A     | 419 | GLU  |
| 1   | C     | 419 | GLU  |

### 5.3.2 Protein sidechains [i](#)

In the following table, the Percentiles column shows the percent sidechain outliers of the chain as a percentile score with respect to all X-ray entries followed by that with respect to entries of similar resolution.

The Analysed column shows the number of residues for which the sidechain conformation was analysed, and the total number of residues.

| Mol | Chain | Analysed      | Rotameric | Outliers | Percentiles |    |
|-----|-------|---------------|-----------|----------|-------------|----|
| 1   | A     | 220/232 (95%) | 211 (96%) | 9 (4%)   | 30          | 11 |
| 1   | B     | 205/232 (88%) | 201 (98%) | 4 (2%)   | 55          | 37 |
| 1   | C     | 218/232 (94%) | 211 (97%) | 7 (3%)   | 39          | 18 |
| 1   | D     | 209/232 (90%) | 207 (99%) | 2 (1%)   | 76          | 65 |
| All | All   | 852/928 (92%) | 830 (97%) | 22 (3%)  | 46          | 26 |

All (22) residues with a non-rotameric sidechain are listed below:

| Mol | Chain | Res | Type |
|-----|-------|-----|------|
| 1   | A     | 332 | ASP  |
| 1   | A     | 358 | ILE  |
| 1   | A     | 419 | GLU  |
| 1   | A     | 425 | PHE  |
| 1   | A     | 436 | ARG  |
| 1   | A     | 524 | HIS  |
| 1   | A     | 525 | LEU  |

*Continued on next page...*

Continued from previous page...

| Mol | Chain | Res | Type |
|-----|-------|-----|------|
| 1   | A     | 526 | TYR  |
| 1   | A     | 544 | LEU  |
| 1   | B     | 306 | LEU  |
| 1   | B     | 468 | SER  |
| 1   | B     | 501 | HIS  |
| 1   | B     | 544 | LEU  |
| 1   | C     | 306 | LEU  |
| 1   | C     | 332 | ASP  |
| 1   | C     | 358 | ILE  |
| 1   | C     | 437 | MET  |
| 1   | C     | 515 | ARG  |
| 1   | C     | 525 | LEU  |
| 1   | C     | 544 | LEU  |
| 1   | D     | 436 | ARG  |
| 1   | D     | 437 | MET  |

Some sidechains can be flipped to improve hydrogen bonding and reduce clashes. All (5) such sidechains are listed below:

| Mol | Chain | Res | Type |
|-----|-------|-----|------|
| 1   | C     | 359 | ASN  |
| 1   | C     | 398 | HIS  |
| 1   | C     | 519 | ASN  |
| 1   | D     | 373 | HIS  |
| 1   | D     | 519 | ASN  |

### 5.3.3 RNA [i](#)

There are no RNA molecules in this entry.

### 5.4 Non-standard residues in protein, DNA, RNA chains [i](#)

There are no non-standard protein/DNA/RNA residues in this entry.

### 5.5 Carbohydrates [i](#)

There are no monosaccharides in this entry.

## 5.6 Ligand geometry

Of 4 ligands modelled in this entry, 4 could not be matched to an existing wwPDB Chemical Component Dictionary definition at this stage - leaving 0 for Mogul analysis.

There are no bond length outliers.

There are no bond angle outliers.

There are no chirality outliers.

There are no torsion outliers.

There are no ring outliers.

No monomer is involved in short contacts.

The following is a two-dimensional graphical depiction of Mogul quality analysis of bond lengths, bond angles, torsion angles, and ring geometry for all instances of the Ligand of Interest. In addition, ligands with molecular weight > 250 and outliers as shown on the validation Tables will also be included. For torsion angles, if less than 5% of the Mogul distribution of torsion angles is within 10 degrees of the torsion angle in question, then that torsion angle is considered an outlier. Any bond that is central to one or more torsion angles identified as an outlier by Mogul will be highlighted in the graph. For rings, the root-mean-square deviation (RMSD) between the ring in question and similar rings identified by Mogul is calculated over all ring torsion angles. If the average RMSD is greater than 60 degrees and the minimal RMSD between the ring in question and any Mogul-identified rings is also greater than 60 degrees, then that ring is considered an outlier. The outliers are highlighted in purple. The color gray indicates Mogul did not find sufficient equivalents in the CSD to analyse the geometry.

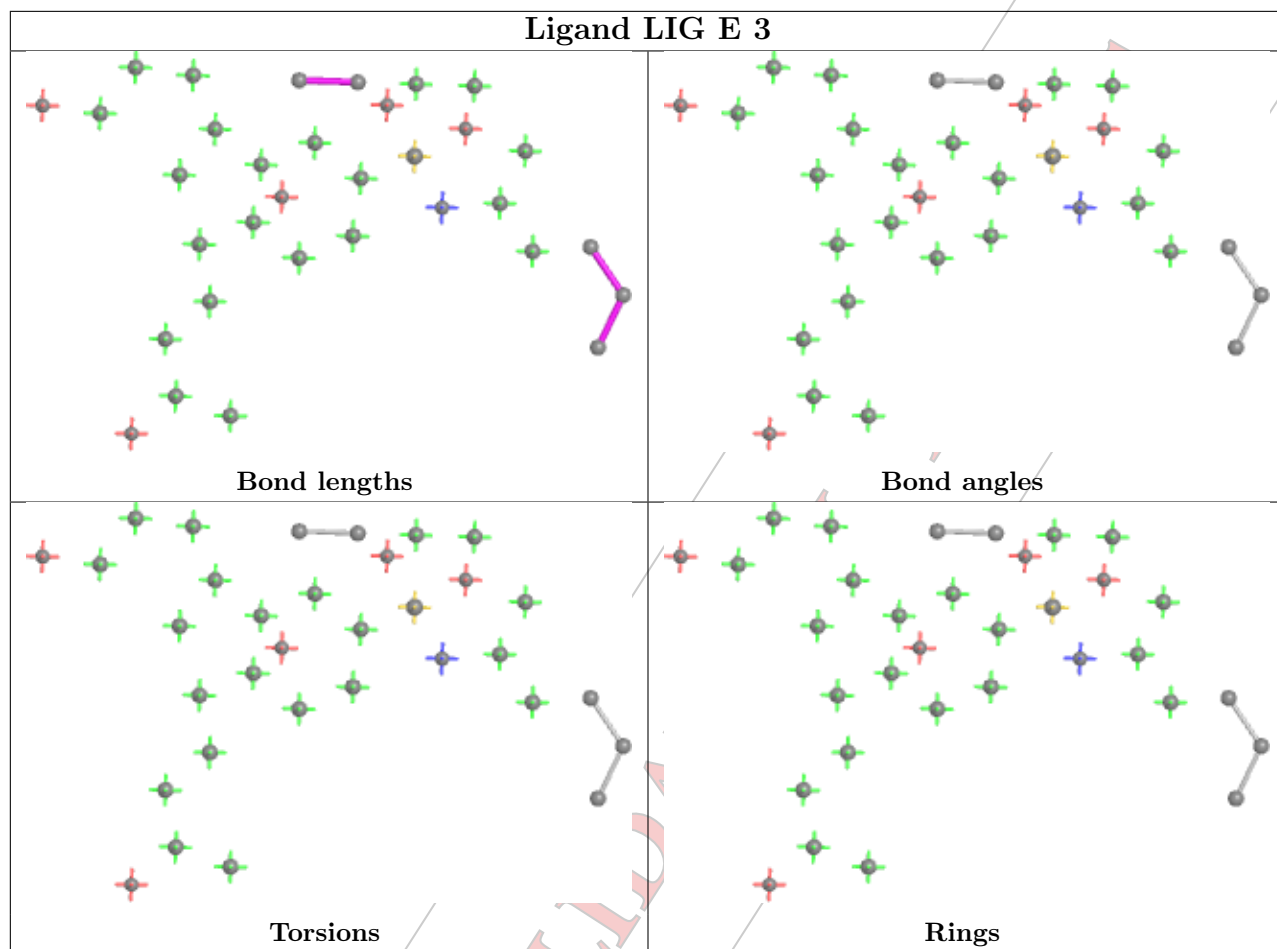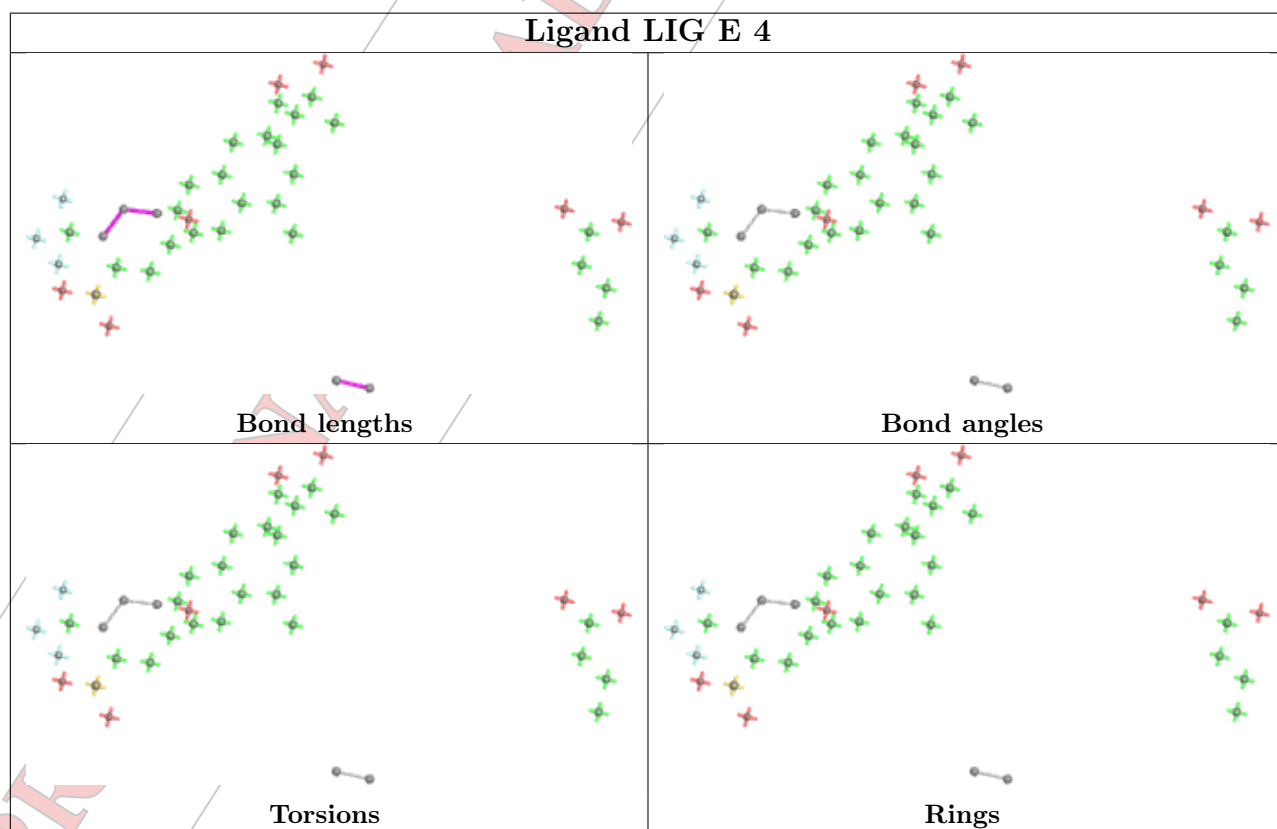

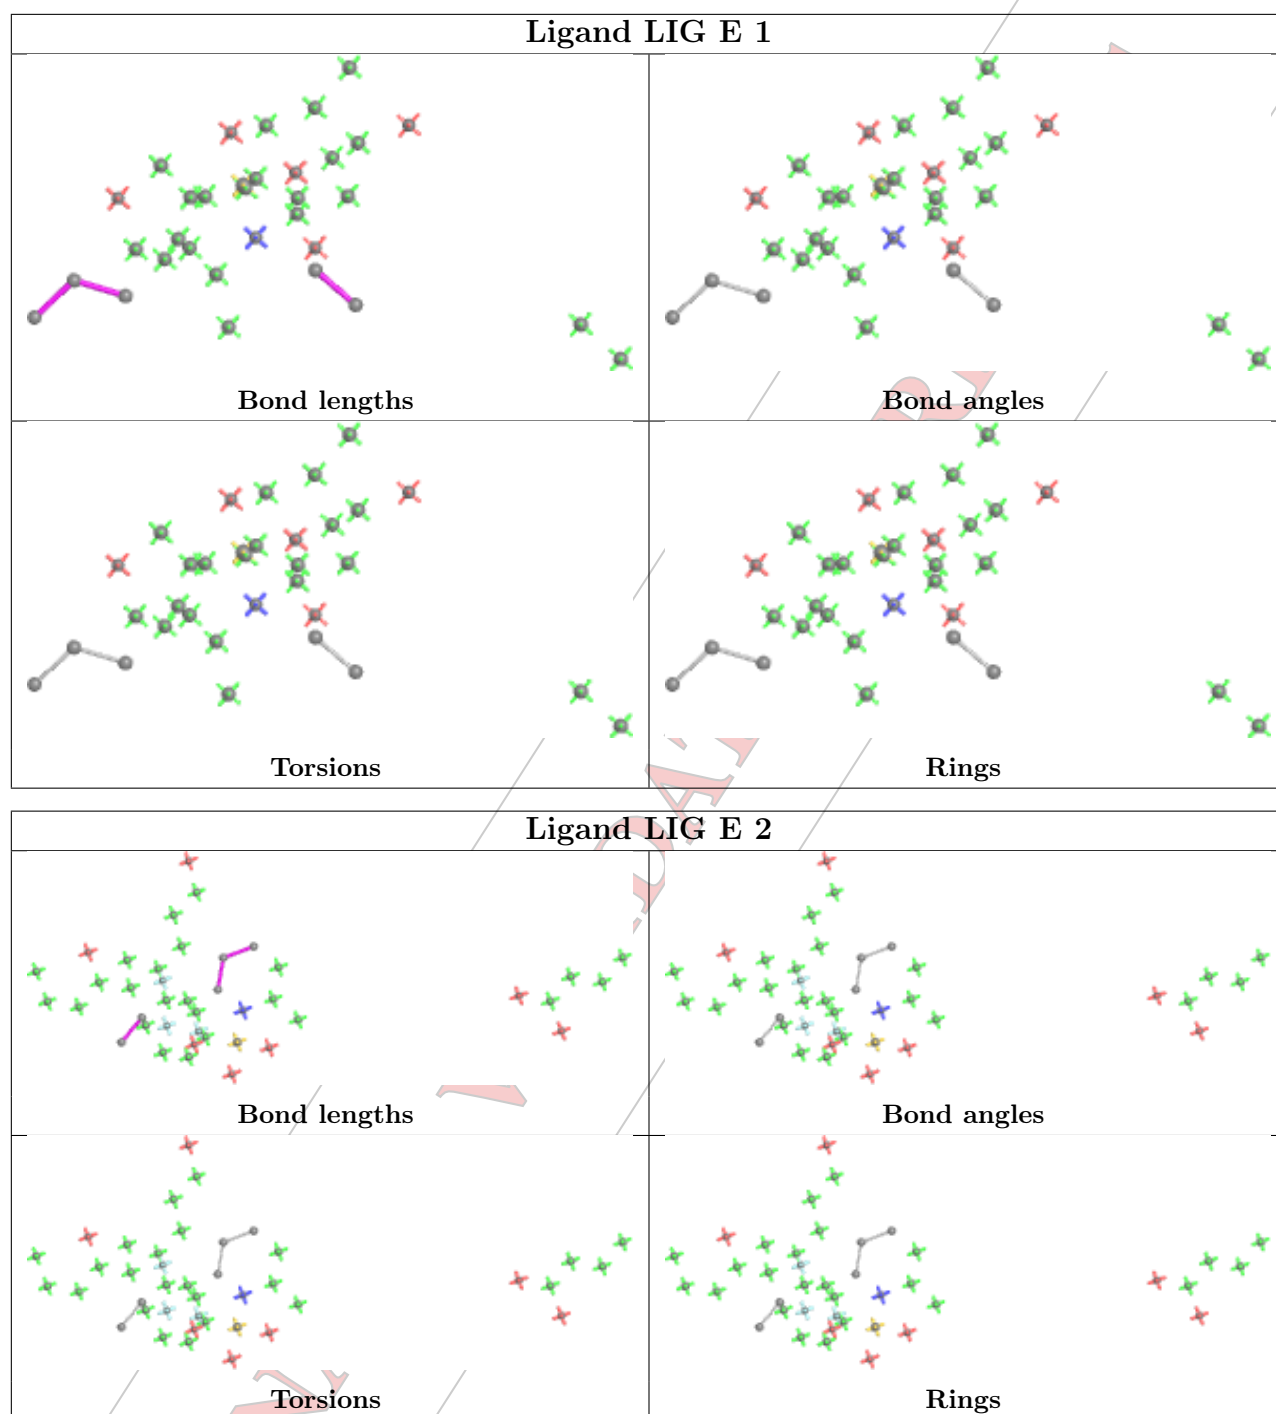

## 5.7 Other polymers [\(i\)](#)

There are no such residues in this entry.

## 5.8 Polymer linkage issues [\(i\)](#)

There are no chain breaks in this entry.



## 6 Fit of model and data i

### 6.1 Protein, DNA and RNA chains i

In the following table, the column labelled '#RSRZ > 2' contains the number (and percentage) of RSRZ outliers, followed by percent RSRZ outliers for the chain as percentile scores relative to all X-ray entries and entries of similar resolution. The OWAB column contains the minimum, median, 95<sup>th</sup> percentile and maximum values of the occupancy-weighted average B-factor per residue. The column labelled 'Q < 0.9' lists the number of (and percentage) of residues with an average occupancy less than 0.9.

| Mol | Chain | Analysed       | <RSRZ> | #RSRZ>2       | OWAB(Å <sup>2</sup> ) | Q<0.9 |
|-----|-------|----------------|--------|---------------|-----------------------|-------|
| 1   | A     | 244/260 (93%)  | 0.47   | 19 (7%) 13 15 | 14, 25, 62, 84        | 0     |
| 1   | B     | 228/260 (87%)  | 0.45   | 13 (5%) 23 26 | 14, 26, 65, 101       | 0     |
| 1   | C     | 246/260 (94%)  | 0.64   | 30 (12%) 4 4  | 16, 29, 67, 100       | 0     |
| 1   | D     | 232/260 (89%)  | 0.47   | 18 (7%) 13 15 | 14, 28, 60, 104       | 0     |
| All | All   | 950/1040 (91%) | 0.51   | 80 (8%) 11 12 | 14, 27, 65, 104       | 0     |

All (80) RSRZ outliers are listed below:

| Mol | Chain | Res | Type | RSRZ |
|-----|-------|-----|------|------|
| 1   | C     | 526 | TYR  | 9.9  |
| 1   | A     | 418 | VAL  | 8.6  |
| 1   | D     | 303 | LYS  | 8.6  |
| 1   | A     | 420 | GLY  | 8.2  |
| 1   | C     | 418 | VAL  | 7.6  |
| 1   | B     | 304 | ASN  | 7.1  |
| 1   | B     | 417 | CYS  | 6.9  |
| 1   | B     | 468 | SER  | 5.8  |
| 1   | A     | 526 | TYR  | 5.8  |
| 1   | C     | 464 | SER  | 5.7  |
| 1   | D     | 304 | ASN  | 5.6  |
| 1   | D     | 546 | ALA  | 5.3  |
| 1   | B     | 303 | LYS  | 5.3  |
| 1   | A     | 464 | SER  | 5.1  |
| 1   | D     | 417 | CYS  | 5.0  |
| 1   | D     | 462 | LEU  | 4.9  |
| 1   | B     | 469 | LEU  | 4.7  |
| 1   | A     | 417 | CYS  | 4.7  |
| 1   | C     | 524 | HIS  | 4.4  |
| 1   | C     | 527 | SER  | 4.3  |
| 1   | C     | 333 | PRO  | 4.3  |

*Continued on next page...*

*Continued from previous page...*

| Mol | Chain | Res | Type | RSRZ |
|-----|-------|-----|------|------|
| 1   | C     | 419 | GLU  | 4.1  |
| 1   | B     | 461 | PHE  | 4.0  |
| 1   | C     | 299 | LYS  | 3.9  |
| 1   | A     | 462 | LEU  | 3.8  |
| 1   | C     | 295 | SER  | 3.7  |
| 1   | C     | 413 | ASN  | 3.6  |
| 1   | C     | 332 | ASP  | 3.6  |
| 1   | C     | 298 | ILE  | 3.6  |
| 1   | C     | 421 | ALA  | 3.5  |
| 1   | B     | 546 | ALA  | 3.5  |
| 1   | C     | 420 | GLY  | 3.4  |
| 1   | C     | 334 | THR  | 3.4  |
| 1   | C     | 461 | PHE  | 3.3  |
| 1   | C     | 546 | ALA  | 3.3  |
| 1   | A     | 524 | HIS  | 3.3  |
| 1   | C     | 417 | CYS  | 3.3  |
| 1   | D     | 306 | LEU  | 3.2  |
| 1   | C     | 331 | TYR  | 3.2  |
| 1   | C     | 414 | GLN  | 3.1  |
| 1   | A     | 425 | PHE  | 3.0  |
| 1   | B     | 331 | TYR  | 3.0  |
| 1   | D     | 419 | GLU  | 3.0  |
| 1   | C     | 469 | LEU  | 3.0  |
| 1   | C     | 463 | SER  | 2.9  |
| 1   | A     | 333 | PRO  | 2.9  |
| 1   | D     | 413 | ASN  | 2.8  |
| 1   | A     | 461 | PHE  | 2.8  |
| 1   | C     | 462 | LEU  | 2.8  |
| 1   | D     | 532 | ASN  | 2.8  |
| 1   | C     | 534 | VAL  | 2.8  |
| 1   | D     | 437 | MET  | 2.8  |
| 1   | D     | 461 | PHE  | 2.8  |
| 1   | C     | 525 | LEU  | 2.7  |
| 1   | D     | 463 | SER  | 2.7  |
| 1   | C     | 422 | VAL  | 2.6  |
| 1   | D     | 464 | SER  | 2.6  |
| 1   | D     | 416 | LYS  | 2.6  |
| 1   | B     | 420 | GLY  | 2.6  |
| 1   | B     | 413 | ASN  | 2.6  |
| 1   | C     | 533 | ALA  | 2.6  |
| 1   | A     | 299 | LYS  | 2.5  |
| 1   | A     | 460 | THR  | 2.4  |

*Continued on next page...*

Continued from previous page...

| Mol | Chain | Res | Type | RSRZ |
|-----|-------|-----|------|------|
| 1   | C     | 411 | ASP  | 2.4  |
| 1   | D     | 422 | VAL  | 2.3  |
| 1   | A     | 421 | MET  | 2.3  |
| 1   | A     | 295 | SER  | 2.3  |
| 1   | B     | 419 | GLU  | 2.3  |
| 1   | A     | 437 | MET  | 2.3  |
| 1   | A     | 465 | THR  | 2.3  |
| 1   | C     | 302 | LYS  | 2.2  |
| 1   | D     | 527 | SER  | 2.2  |
| 1   | A     | 466 | LEU  | 2.2  |
| 1   | C     | 437 | MET  | 2.2  |
| 1   | A     | 534 | VAL  | 2.2  |
| 1   | B     | 458 | VAL  | 2.2  |
| 1   | B     | 545 | ASP  | 2.1  |
| 1   | D     | 545 | ASP  | 2.1  |
| 1   | A     | 422 | VAL  | 2.1  |
| 1   | D     | 418 | VAL  | 2.0  |

## 6.2 Non-standard residues in protein, DNA, RNA chains [i](#)

There are no non-standard protein/DNA/RNA residues in this entry.

## 6.3 Carbohydrates [i](#)

There are no monosaccharides in this entry.

## 6.4 Ligands [i](#)

In the following table, the Atoms column lists the number of modelled atoms in the group and the number defined in the chemical component dictionary. The B-factors column lists the minimum, median, 95<sup>th</sup> percentile and maximum values of B factors of atoms in the group. The column labelled 'Q < 0.9' lists the number of atoms with occupancy less than 0.9.

| Mol | Type | Chain | Res | Atoms | RSCC | RSR  | B-factors(Å <sup>2</sup> ) | Q < 0.9 |
|-----|------|-------|-----|-------|------|------|----------------------------|---------|
| 2   | LIG  | E     | 3   | 33/?  | 0.92 | 0.13 | 16,26,67,83                | 0       |
| 2   | LIG  | E     | 4   | 41/?  | 0.93 | 0.12 | 20,34,57,81                | 0       |
| 2   | LIG  | E     | 1   | 33/?  | 0.93 | 0.12 | 15,25,51,65                | 0       |
| 2   | LIG  | E     | 2   | 41/?  | 0.95 | 0.11 | 15,32,48,63                | 0       |

The following is a graphical depiction of the model fit to experimental electron density of all

instances of the Ligand of Interest. In addition, ligands with molecular weight > 250 and outliers as shown on the geometry validation Tables will also be included. Each fit is shown from different orientation to approximate a three-dimensional view.

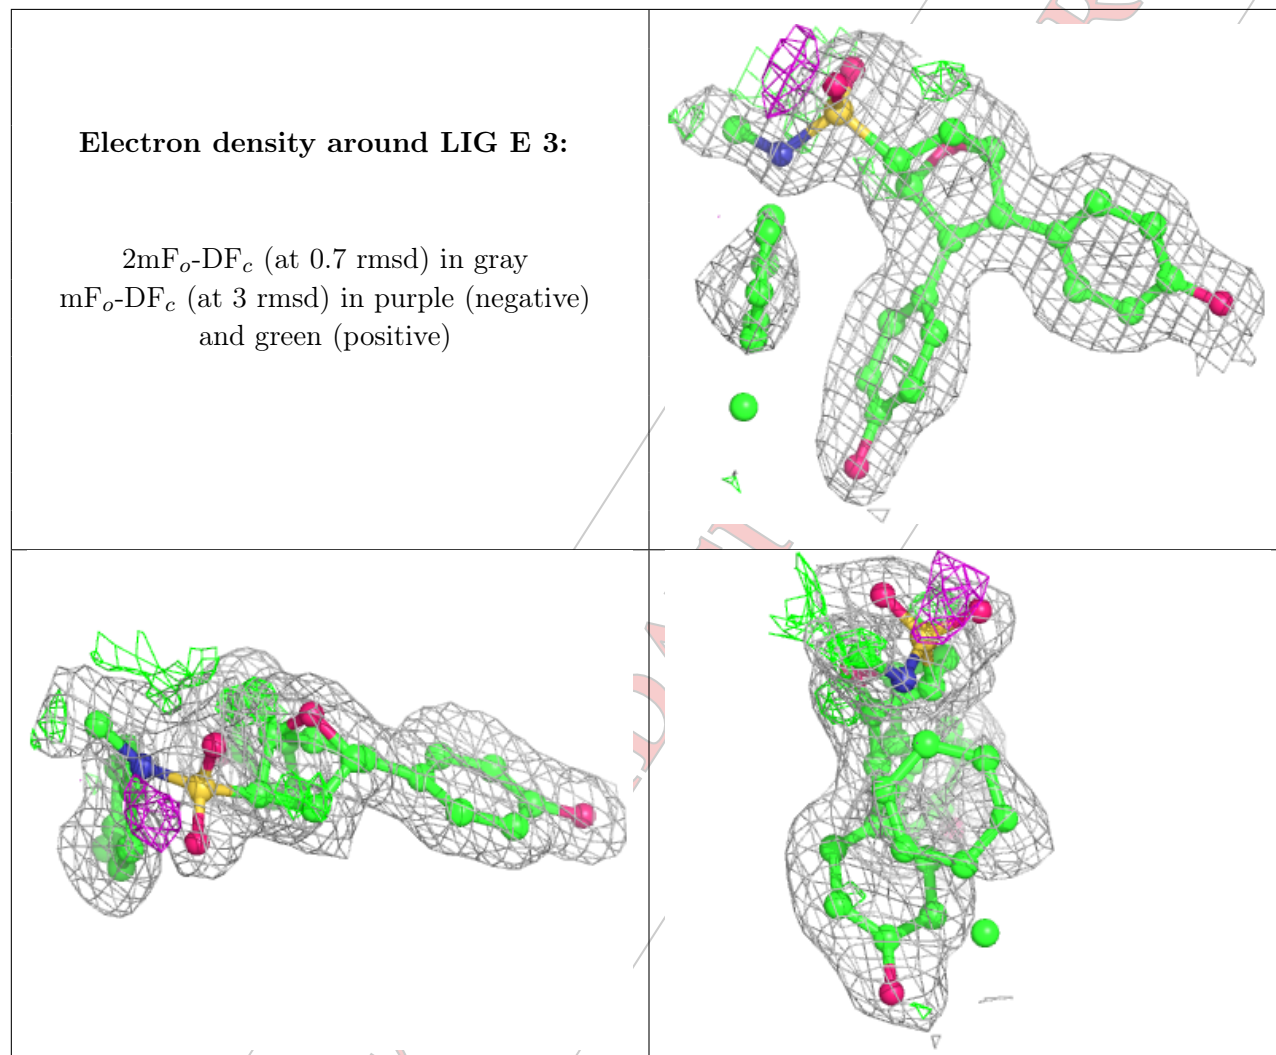

PRELIMINARY

**Electron density around LIG E 4:**

$2mF_o-DF_c$  (at 0.7 rmsd) in gray  
 $mF_o-DF_c$  (at 3 rmsd) in purple (negative)  
and green (positive)

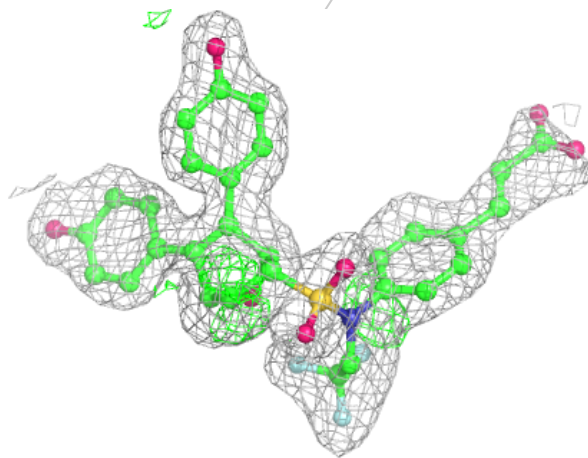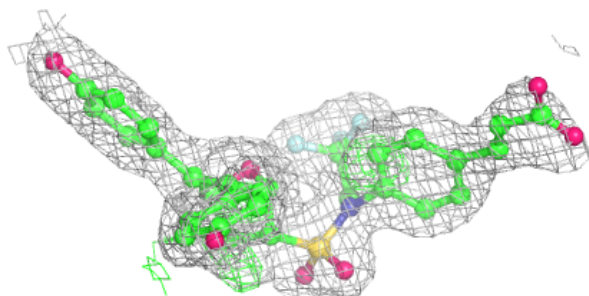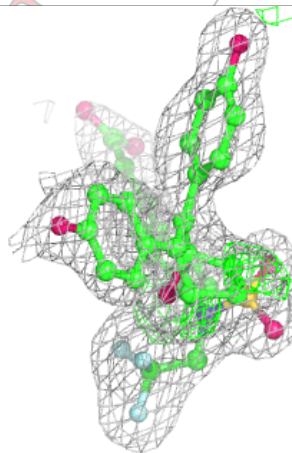

PRELIMINARY VALIDATION

**Electron density around LIG E 1:**

$2mF_o-DF_c$  (at 0.7 rmsd) in gray  
 $mF_o-DF_c$  (at 3 rmsd) in purple (negative)  
and green (positive)

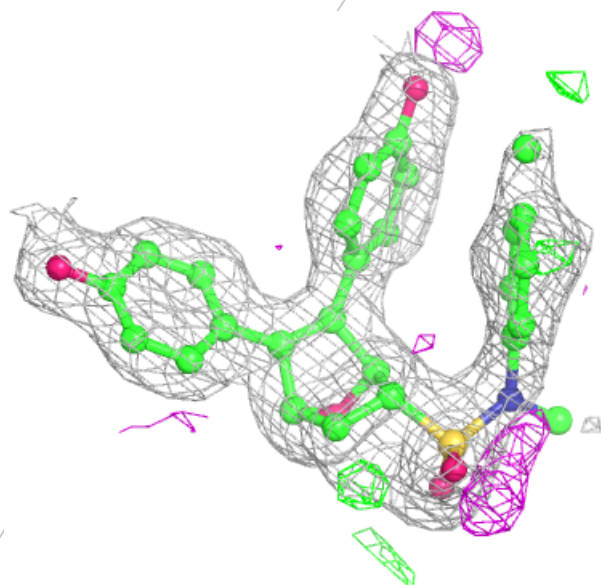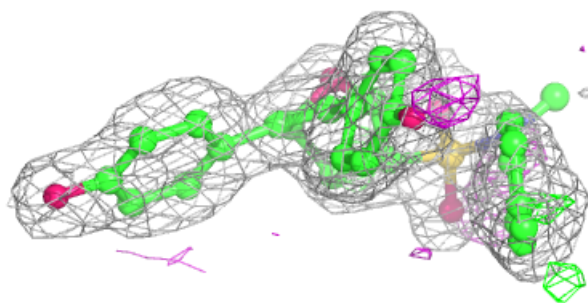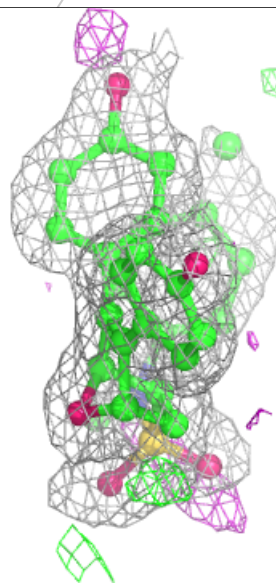

PRELIMINARY

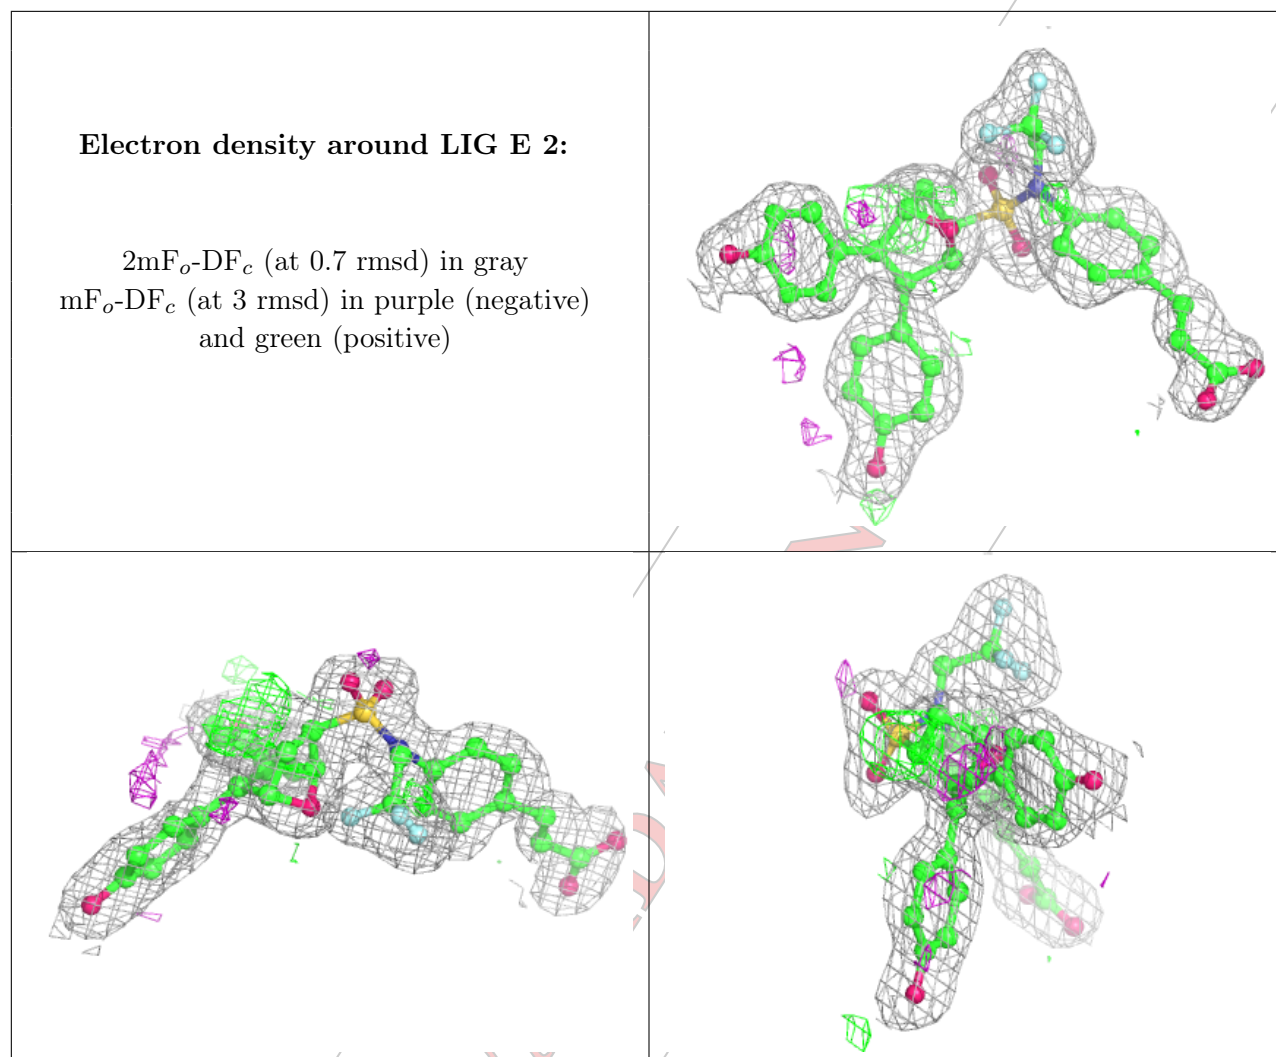

## 6.5 Other polymers [i](#)

There are no such residues in this entry.

PRELIMINARY



# Preliminary Full wwPDB X-ray Structure Validation Report ⓘ

Aug 9, 2020 – 10:41 PM EDT

Deposition ID : D\_1000251220

This is a Preliminary Full wwPDB X-ray Structure Validation Report.

This report is produced by the wwPDB Deposition System during initial deposition but before annotation of the structure.

We welcome your comments at [validation@mail.wwpdb.org](mailto:validation@mail.wwpdb.org)

A user guide is available at

<https://www.wwpdb.org/validation/2017/XrayValidationReportHelp>

with specific help available everywhere you see the ⓘ symbol.

---

The following versions of software and data (see [references ⓘ](#)) were used in the production of this report:

|                                |   |                                                                    |
|--------------------------------|---|--------------------------------------------------------------------|
| MolProbity                     | : | 4.02b-467                                                          |
| Mogul                          | : | 1.8.5 (274361), CSD as541be (2020)                                 |
| Xtriage (Phenix)               | : | 1.13                                                               |
| EDS                            | : | 2.13.1                                                             |
| buster-report                  | : | 1.1.7 (2018)                                                       |
| Percentile statistics          | : | 20191225.v01 (using entries in the PDB archive December 25th 2019) |
| Refmac                         | : | 5.8.0158                                                           |
| CCP4                           | : | 7.0.044 (Gargrove)                                                 |
| Ideal geometry (proteins)      | : | Engh & Huber (2001)                                                |
| Ideal geometry (DNA, RNA)      | : | Parkinson et al. (1996)                                            |
| Validation Pipeline (wwPDB-VP) | : | 2.13.1                                                             |



# 1 Overall quality at a glance i

The following experimental techniques were used to determine the structure:  
*X-RAY DIFFRACTION*

The reported resolution of this entry is 1.70 Å.

Percentile scores (ranging between 0-100) for global validation metrics of the entry are shown in the following graphic. The table shows the number of entries on which the scores are based.

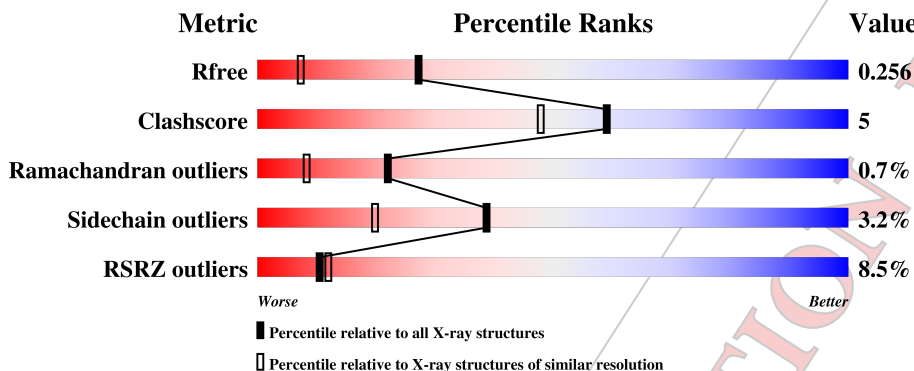

| Metric                | Whole archive (#Entries) | Similar resolution (#Entries, resolution range(Å)) |
|-----------------------|--------------------------|----------------------------------------------------|
| $R_{free}$            | 130704                   | 4298 (1.70-1.70)                                   |
| Clashscore            | 141614                   | 4695 (1.70-1.70)                                   |
| Ramachandran outliers | 138981                   | 4610 (1.70-1.70)                                   |
| Sidechain outliers    | 138945                   | 4610 (1.70-1.70)                                   |
| RSRZ outliers         | 127900                   | 4222 (1.70-1.70)                                   |

The table below summarises the geometric issues observed across the polymeric chains and their fit to the electron density. The red, orange, yellow and green segments on the lower bar indicate the fraction of residues that contain outliers for  $\geq 3$ , 2, 1 and 0 types of geometric quality criteria respectively. A grey segment represents the fraction of residues that are not modelled. The numeric value for each fraction is indicated below the corresponding segment, with a dot representing fractions  $\leq 5\%$ . The upper red bar (where present) indicates the fraction of residues that have poor fit to the electron density. The numeric value is given above the bar.

| Mol | Chain | Length | Quality of chain                                                                                                                                                                                                                                                                                                                                                                                                                                                          |
|-----|-------|--------|---------------------------------------------------------------------------------------------------------------------------------------------------------------------------------------------------------------------------------------------------------------------------------------------------------------------------------------------------------------------------------------------------------------------------------------------------------------------------|
| 1   | A     | 257    | <div style="display: flex; align-items: center;"> <div style="width: 11%; height: 10px; background-color: red; margin-right: 5px;"></div> <div style="width: 82%; height: 10px; background-color: green; margin-right: 5px;"></div> <div style="width: 11%; height: 10px; background-color: yellow; margin-right: 5px;"></div> <div style="width: 5%; height: 10px; background-color: grey;"></div> </div> <p style="text-align: center;">11%      82%      11% • 5%</p>  |
| 1   | B     | 257    | <div style="display: flex; align-items: center;"> <div style="width: 4%; height: 10px; background-color: red; margin-right: 5px;"></div> <div style="width: 77%; height: 10px; background-color: green; margin-right: 5px;"></div> <div style="width: 10%; height: 10px; background-color: yellow; margin-right: 5px;"></div> <div style="width: 12%; height: 10px; background-color: grey;"></div> </div> <p style="text-align: center;">4%      77%      10% • 12%</p>  |
| 1   | C     | 257    | <div style="display: flex; align-items: center;"> <div style="width: 8%; height: 10px; background-color: red; margin-right: 5px;"></div> <div style="width: 79%; height: 10px; background-color: green; margin-right: 5px;"></div> <div style="width: 12%; height: 10px; background-color: yellow; margin-right: 5px;"></div> <div style="width: 8%; height: 10px; background-color: grey;"></div> </div> <p style="text-align: center;">8%      79%      12% • 8%</p>    |
| 1   | D     | 257    | <div style="display: flex; align-items: center;"> <div style="width: 7%; height: 10px; background-color: red; margin-right: 5px;"></div> <div style="width: 78%; height: 10px; background-color: green; margin-right: 5px;"></div> <div style="width: 9%; height: 10px; background-color: yellow; margin-right: 5px;"></div> <div style="width: 13%; height: 10px; background-color: grey;"></div> </div> <p style="text-align: center;">7%      78%      9%      13%</p> |

## 2 Entry composition i

There are 3 unique types of molecules in this entry. The entry contains 7811 atoms, of which 0 are hydrogens and 0 are deuteriums.

In the tables below, the ZeroOcc column contains the number of atoms modelled with zero occupancy, the AltConf column contains the number of residues with at least one atom in alternate conformation and the Trace column contains the number of residues modelled with at most 2 atoms.

- Molecule 1 is a protein called Estrogen Receptor.

| Mol | Chain | Residues | Atoms         |           |          |          |         | ZeroOcc | AltConf | Trace |
|-----|-------|----------|---------------|-----------|----------|----------|---------|---------|---------|-------|
|     |       |          | Total         | C         | N        | O        | S       |         |         |       |
| 1   | A     | 243      | Total<br>1939 | C<br>1238 | N<br>329 | O<br>353 | S<br>19 | 0       | 1       | 0     |
| 1   | B     | 226      | Total<br>1809 | C<br>1160 | N<br>306 | O<br>326 | S<br>17 | 0       | 0       | 0     |
| 1   | C     | 237      | Total<br>1898 | C<br>1213 | N<br>319 | O<br>348 | S<br>18 | 0       | 1       | 0     |
| 1   | D     | 224      | Total<br>1789 | C<br>1144 | N<br>304 | O<br>323 | S<br>18 | 0       | 0       | 0     |

- Molecule 2 is a ligand with the chemical component id LIG but its atom names do not match the existing wwPDB Chemical Component Dictionary definition for LIG. Consequently no firm identification of ligand chemistry can be made. Once the structure is annotated then an identification and diagram will be given here.

| Mol | Chain | Residues | Atoms       |         |        |        |        | ZeroOcc | AltConf |   |
|-----|-------|----------|-------------|---------|--------|--------|--------|---------|---------|---|
|     |       |          | Total       | C       | F      | N      | O      |         |         | S |
| 2   | E     | 1        | Total<br>36 | C<br>26 | F<br>3 | N<br>1 | O<br>5 | S<br>1  | 0       | 0 |
| 2   | E     | 1        | Total<br>37 | C<br>26 | F<br>3 | N<br>1 | O<br>6 | S<br>1  | 0       | 0 |
| 2   | E     | 1        | Total<br>31 | C<br>21 | F<br>3 | N<br>1 | O<br>5 | S<br>1  | 0       | 0 |
| 2   | E     | 1        | Total<br>37 | C<br>26 | F<br>3 | N<br>1 | O<br>6 | S<br>1  | 0       | 0 |

- Molecule 3 is water.

| Mol | Chain | Residues | Atoms        |          | ZeroOcc | AltConf |
|-----|-------|----------|--------------|----------|---------|---------|
| 3   | S     | 235      | Total<br>235 | O<br>235 | 0       | 0       |

### 3 Residue-property plots [i](#)

These plots are drawn for all protein, RNA, DNA and oligosaccharide chains in the entry. The first graphic for a chain summarises the proportions of the various outlier classes displayed in the second graphic. The second graphic shows the sequence view annotated by issues in geometry and electron density. Residues are color-coded according to the number of geometric quality criteria for which they contain at least one outlier: green = 0, yellow = 1, orange = 2 and red = 3 or more. A red dot above a residue indicates a poor fit to the electron density ( $RSRZ > 2$ ). Stretches of 2 or more consecutive residues without any outlier are shown as a green connector. Residues present in the sample, but not in the model, are shown in grey.

- Molecule 1: Estrogen Receptor

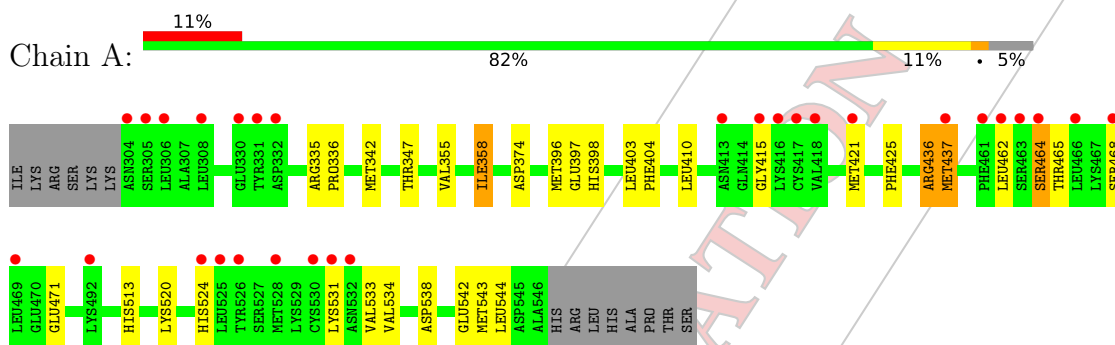

- Molecule 1: Estrogen Receptor

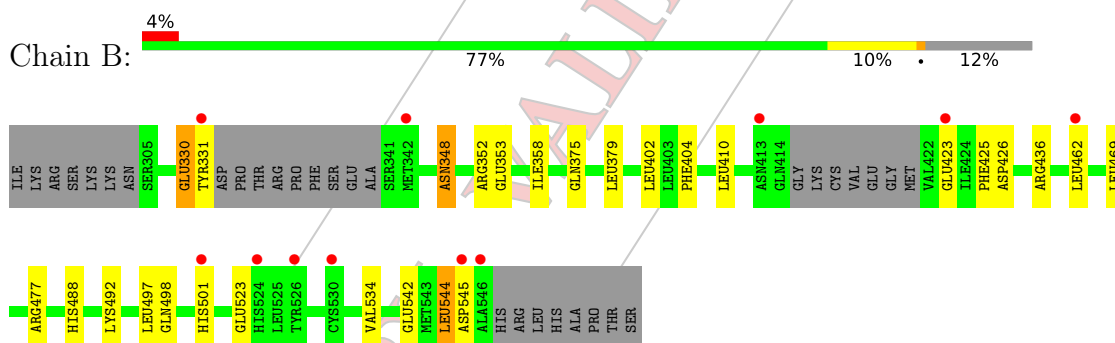

- Molecule 1: Estrogen Receptor

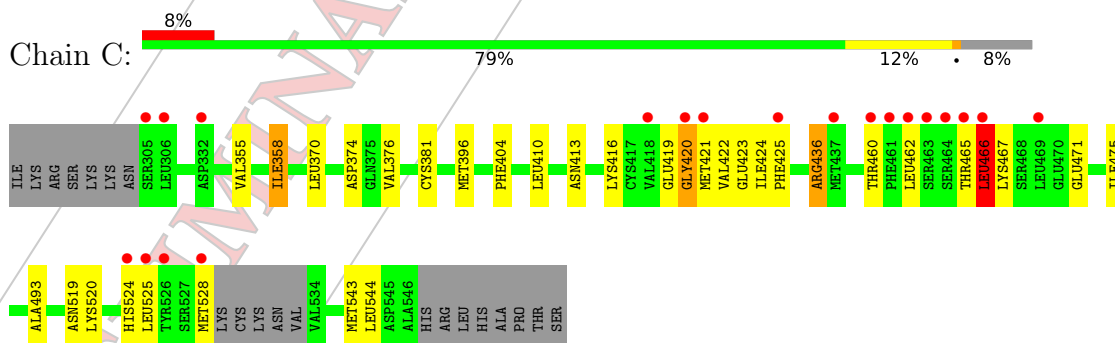

- Molecule 1: Estrogen Receptor

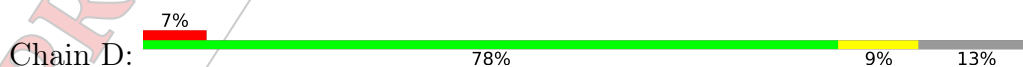

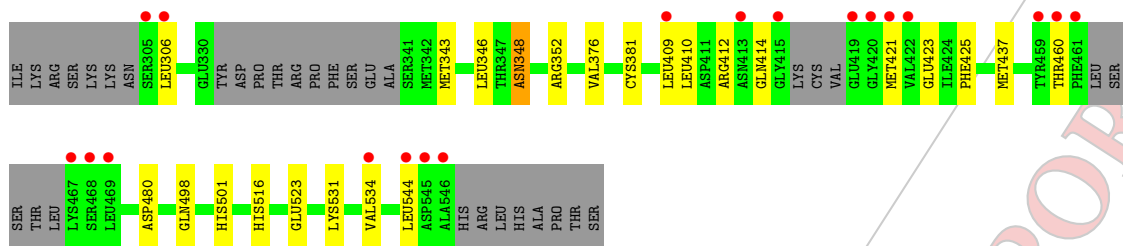

PRELIMINARY VALIDATION REPORT

## 4 Data and refinement statistics i

| Property                                                                | Value                                                       | Source           |
|-------------------------------------------------------------------------|-------------------------------------------------------------|------------------|
| Space group                                                             | P 1                                                         | Depositor        |
| Cell constants<br>a, b, c, $\alpha$ , $\beta$ , $\gamma$                | 53.57Å 58.81Å 92.86Å<br>86.70° 75.09° 62.91°                | Depositor        |
| Resolution (Å)                                                          | 89.52 – 1.70<br>89.51 – 1.70                                | Depositor<br>EDS |
| % Data completeness<br>(in resolution range)                            | 58.9 (89.52-1.70)<br>58.9 (89.51-1.70)                      | Depositor<br>EDS |
| $R_{merge}$                                                             | (Not available)                                             | Depositor        |
| $R_{sym}$                                                               | (Not available)                                             | Depositor        |
| $\langle I/\sigma(I) \rangle$ <sup>1</sup>                              | 1.11 (at 1.70Å)                                             | Xtrriage         |
| Refinement program                                                      | REFMAC 5.8.0258                                             | Depositor        |
| R, $R_{free}$                                                           | 0.214 , 0.252<br>0.225 , 0.256                              | Depositor<br>DCC |
| $R_{free}$ test set                                                     | 3121 reflections (4.97%)                                    | wwPDB-VP         |
| Wilson B-factor (Å <sup>2</sup> )                                       | 27.9                                                        | Xtrriage         |
| Anisotropy                                                              | 0.027                                                       | Xtrriage         |
| Bulk solvent $k_{sol}$ (e/Å <sup>3</sup> ), $B_{sol}$ (Å <sup>2</sup> ) | 0.38 , 47.7                                                 | EDS              |
| L-test for twinning <sup>2</sup>                                        | $\langle  L  \rangle = 0.50$ , $\langle L^2 \rangle = 0.33$ | Xtrriage         |
| Estimated twinning fraction                                             | 0.115 for h,h-k,h-l                                         | Xtrriage         |
| $F_o, F_c$ correlation                                                  | 0.93                                                        | EDS              |
| Total number of atoms                                                   | 7811                                                        | wwPDB-VP         |
| Average B, all atoms (Å <sup>2</sup> )                                  | 39.0                                                        | wwPDB-VP         |

Xtrriage's analysis on translational NCS is as follows: *The largest off-origin peak in the Patterson function is 6.50% of the height of the origin peak. No significant pseudotranslation is detected.*

<sup>1</sup>Intensities estimated from amplitudes.

<sup>2</sup>Theoretical values of  $\langle |L| \rangle$ ,  $\langle L^2 \rangle$  for acentric reflections are 0.5, 0.333 respectively for untwinned datasets, and 0.375, 0.2 for perfectly twinned datasets.

## 5 Model quality i

### 5.1 Standard geometry i

Bond lengths and bond angles in the following residue types are not validated in this section: LIG, YCM

The Z score for a bond length (or angle) is the number of standard deviations the observed value is removed from the expected value. A bond length (or angle) with  $|Z| > 5$  is considered an outlier worth inspection. RMSZ is the root-mean-square of all Z scores of the bond lengths (or angles).

| Mol | Chain | Bond lengths |         | Bond angles |                |
|-----|-------|--------------|---------|-------------|----------------|
|     |       | RMSZ         | # Z  >5 | RMSZ        | # Z  >5        |
| 1   | A     | 0.55         | 0/1964  | 0.72        | 1/2653 (0.0%)  |
| 1   | B     | 0.55         | 0/1829  | 0.75        | 1/2468 (0.0%)  |
| 1   | C     | 0.57         | 0/1922  | 0.75        | 1/2595 (0.0%)  |
| 1   | D     | 0.56         | 0/1796  | 0.74        | 1/2416 (0.0%)  |
| All | All   | 0.56         | 0/7511  | 0.74        | 4/10132 (0.0%) |

Chiral center outliers are detected by calculating the chiral volume of a chiral center and verifying if the center is modelled as a planar moiety or with the opposite hand. A planarity outlier is detected by checking planarity of atoms in a peptide group, atoms in a mainchain group or atoms of a sidechain that are expected to be planar.

| Mol | Chain | #Chirality outliers | #Planarity outliers |
|-----|-------|---------------------|---------------------|
| 1   | A     | 0                   | 1                   |

There are no bond length outliers.

All (4) bond angle outliers are listed below:

| Mol | Chain | Res | Type | Atoms     | Z     | Observed(°) | Ideal(°) |
|-----|-------|-----|------|-----------|-------|-------------|----------|
| 1   | A     | 436 | ARG  | NE-CZ-NH1 | 7.10  | 123.85      | 120.30   |
| 1   | C     | 436 | ARG  | NE-CZ-NH1 | 6.93  | 123.76      | 120.30   |
| 1   | B     | 436 | ARG  | NE-CZ-NH2 | -5.46 | 117.57      | 120.30   |
| 1   | D     | 480 | ASP  | CB-CG-OD2 | -5.09 | 113.72      | 118.30   |

There are no chirality outliers.

All (1) planarity outliers are listed below:

| Mol | Chain | Res | Type | Group   |
|-----|-------|-----|------|---------|
| 1   | A     | 335 | ARG  | Peptide |

## 5.2 Too-close contacts [i](#)

In the following table, the Non-H and H(model) columns list the number of non-hydrogen atoms and hydrogen atoms in the chain respectively. The H(added) column lists the number of hydrogen atoms added and optimized by MolProbity. The Clashes column lists the number of clashes within the asymmetric unit, whereas Symm-Clashes lists symmetry related clashes.

| Mol | Chain | Non-H | H(model) | H(added) | Clashes | Symm-Clashes |
|-----|-------|-------|----------|----------|---------|--------------|
| 1   | A     | 1939  | 0        | 1978     | 16      | 1            |
| 1   | B     | 1809  | 0        | 1859     | 16      | 0            |
| 1   | C     | 1898  | 0        | 1930     | 29      | 1            |
| 1   | D     | 1789  | 0        | 1832     | 13      | 0            |
| 2   | E     | 141   | 0        | 4        | 7       | 0            |
| 3   | S     | 235   | 0        | 0        | 4       | 0            |
| All | All   | 7811  | 0        | 7603     | 72      | 1            |

The all-atom clashscore is defined as the number of clashes found per 1000 atoms (including hydrogen atoms). The all-atom clashscore for this structure is 5.

All (72) close contacts within the same asymmetric unit are listed below, sorted by their clash magnitude.

| Atom-1             | Atom-2            | Interatomic distance (Å) | Clash overlap (Å) |
|--------------------|-------------------|--------------------------|-------------------|
| 1:C:421:MET:SD     | 1:C:423:GLU:HB2   | 1.92                     | 1.10              |
| 1:D:348:ASN:ND2    | 3:S:119:HOH:O     | 1.98                     | 0.94              |
| 1:C:370:LEU:HD11   | 1:C:475:ILE:HD11  | 1.56                     | 0.87              |
| 1:A:397[B]:GLU:OE1 | 1:A:397[B]:GLU:HA | 1.76                     | 0.86              |
| 1:C:416:LYS:HG2    | 1:C:422:VAL:HG21  | 1.60                     | 0.84              |
| 1:A:513:HIS:ND1    | 3:S:86:HOH:O      | 2.17                     | 0.77              |
| 1:A:355:VAL:HG22   | 1:A:543:MET:CE    | 2.17                     | 0.75              |
| 1:A:355:VAL:HG22   | 1:A:543:MET:HE1   | 1.69                     | 0.73              |
| 1:C:413:ASN:OD1    | 3:S:135:HOH:O     | 2.09                     | 0.71              |
| 1:C:421:MET:SD     | 1:C:423:GLU:CB    | 2.78                     | 0.67              |
| 1:A:464:SER:O      | 1:A:468:SER:HB2   | 1.97                     | 0.65              |
| 1:C:355:VAL:HG22   | 1:C:543:MET:CE    | 2.28                     | 0.64              |
| 1:A:404:PHE:CE2    | 1:A:410:LEU:HD12  | 2.39                     | 0.58              |
| 1:C:421:MET:CE     | 1:C:524:HIS:CE1   | 2.88                     | 0.57              |
| 1:B:469:LEU:HD13   | 1:C:493:ALA:O     | 2.06                     | 0.56              |
| 1:B:404:PHE:CE2    | 1:B:410:LEU:HD12  | 2.41                     | 0.56              |
| 1:C:404:PHE:CE2    | 1:C:410:LEU:HD12  | 2.41                     | 0.56              |
| 1:D:343:MET:HE1    | 2:E:4:LIG:C18     | 2.37                     | 0.55              |
| 1:A:347:THR:HG23   | 1:A:533:VAL:HG22  | 1.88                     | 0.55              |
| 1:B:542:GLU:HA     | 1:B:545:ASP:OD1   | 2.07                     | 0.55              |
| 1:D:346:LEU:CD1    | 2:E:4:LIG:C16     | 2.86                     | 0.53              |

*Continued on next page...*

Continued from previous page...

| Atom-1           | Atom-2           | Interatomic distance (Å) | Clash overlap (Å) |
|------------------|------------------|--------------------------|-------------------|
| 1:B:488:HIS:NE2  | 1:B:492:LYS:HD2  | 2.24                     | 0.52              |
| 1:D:343:MET:CE   | 2:E:4:LIG:C18    | 2.88                     | 0.51              |
| 1:C:419:GLU:O    | 1:C:420:GLY:C    | 2.49                     | 0.50              |
| 1:C:419:GLU:O    | 1:C:420:GLY:O    | 2.30                     | 0.49              |
| 1:B:358:ILE:HG23 | 1:B:544:LEU:HD13 | 1.95                     | 0.49              |
| 1:C:466:LEU:HG   | 1:C:467:LYS:N    | 2.27                     | 0.49              |
| 1:C:462:LEU:O    | 1:C:462:LEU:HG   | 2.13                     | 0.49              |
| 1:B:477:ARG:NH2  | 3:S:61:HOH:O     | 2.33                     | 0.48              |
| 2:E:1:LIG:C12    | 2:E:1:LIG:O01    | 2.62                     | 0.48              |
| 1:B:488:HIS:CD2  | 1:B:492:LYS:HD2  | 2.49                     | 0.48              |
| 1:A:358:ILE:HG23 | 1:A:544:LEU:HD23 | 1.97                     | 0.47              |
| 1:C:355:VAL:HG22 | 1:C:543:MET:HE3  | 1.97                     | 0.47              |
| 1:C:465:THR:O    | 1:C:467:LYS:N    | 2.47                     | 0.47              |
| 1:C:421:MET:HE2  | 1:C:524:HIS:CE1  | 2.51                     | 0.46              |
| 1:A:462:LEU:HG   | 1:B:426:ASP:HB3  | 1.98                     | 0.46              |
| 1:C:355:VAL:HA   | 1:C:543:MET:CE   | 2.46                     | 0.46              |
| 1:A:415:GLY:O    | 1:A:421:MET:HB3  | 2.15                     | 0.46              |
| 1:C:520:LYS:O    | 1:C:524:HIS:CD2  | 2.69                     | 0.46              |
| 1:D:346:LEU:HD12 | 2:E:4:LIG:C16    | 2.46                     | 0.46              |
| 1:C:396:MET:O    | 1:C:436:ARG:HD3  | 2.15                     | 0.45              |
| 1:C:519:ASN:HD21 | 1:D:516:HIS:HA   | 1.81                     | 0.45              |
| 1:A:520:LYS:O    | 1:A:524:HIS:CD2  | 2.70                     | 0.45              |
| 1:C:358:ILE:HG23 | 1:C:544:LEU:HD23 | 1.99                     | 0.45              |
| 1:B:375:GLN:HB3  | 1:B:544:LEU:HD21 | 1.98                     | 0.45              |
| 1:B:330:GLU:HA   | 1:B:330:GLU:OE1  | 2.18                     | 0.44              |
| 1:D:348:ASN:HD21 | 1:D:352:ARG:HH21 | 1.63                     | 0.44              |
| 1:B:353:GLU:OE2  | 2:E:2:LIG:O03    | 2.35                     | 0.44              |
| 1:A:396:MET:O    | 1:A:436:ARG:HD3  | 2.18                     | 0.43              |
| 1:B:542:GLU:O    | 1:B:545:ASP:OD1  | 2.36                     | 0.43              |
| 1:B:498:GLN:HA   | 1:B:501:HIS:CE1  | 2.53                     | 0.43              |
| 1:D:498:GLN:HA   | 1:D:501:HIS:CE1  | 2.53                     | 0.43              |
| 1:C:525:LEU:O    | 1:C:528:MET:HG3  | 2.18                     | 0.43              |
| 1:D:412:ARG:HA   | 1:D:425:PHE:CE1  | 2.54                     | 0.42              |
| 1:C:421:MET:HB3  | 1:C:424:ILE:H    | 1.84                     | 0.42              |
| 1:C:421:MET:HE1  | 1:C:524:HIS:CE1  | 2.54                     | 0.42              |
| 1:B:402:LEU:HD12 | 1:B:425:PHE:CE2  | 2.55                     | 0.42              |
| 1:C:374:ASP:OD2  | 1:C:471:GLU:OE2  | 2.37                     | 0.42              |
| 1:D:409:LEU:C    | 1:D:410:LEU:HD12 | 2.40                     | 0.42              |
| 1:A:437:MET:HE3  | 1:A:437:MET:O    | 2.20                     | 0.42              |
| 1:B:348:ASN:HD21 | 1:B:352:ARG:HH21 | 1.66                     | 0.42              |
| 1:D:376:VAL:CG2  | 1:D:544:LEU:HD12 | 2.50                     | 0.41              |

Continued on next page...



Continued from previous page...

| Atom-1           | Atom-2           | Interatomic distance (Å) | Clash overlap (Å) |
|------------------|------------------|--------------------------|-------------------|
| 1:C:355:VAL:HA   | 1:C:543:MET:HE2  | 2.03                     | 0.41              |
| 1:A:398:HIS:CE1  | 1:A:403:LEU:HD12 | 2.55                     | 0.41              |
| 1:C:466:LEU:HG   | 1:C:467:LYS:H    | 1.84                     | 0.41              |
| 1:D:348:ASN:ND2  | 1:D:352:ARG:HH21 | 2.19                     | 0.41              |
| 1:A:533:VAL:HG13 | 2:E:1:LIG:O06    | 2.21                     | 0.41              |
| 1:A:374:ASP:OD2  | 1:A:471:GLU:OE1  | 2.39                     | 0.40              |
| 1:C:376:VAL:CG2  | 1:C:544:LEU:HD12 | 2.52                     | 0.40              |
| 1:D:381:YCM:NZ2  | 1:D:460:THR:HG21 | 2.37                     | 0.40              |
| 1:C:381:YCM:NZ2  | 1:C:460:THR:HG21 | 2.36                     | 0.40              |
| 1:B:358:ILE:CD1  | 1:B:379:LEU:HD13 | 2.52                     | 0.40              |

All (1) symmetry-related close contacts are listed below. The label for Atom-2 includes the symmetry operator and encoded unit-cell translations to be applied.

| Atom-1          | Atom-2                 | Interatomic distance (Å) | Clash overlap (Å) |
|-----------------|------------------------|--------------------------|-------------------|
| 1:A:542:GLU:OE2 | 1:C:465:THR:OG1[1_556] | 2.16                     | 0.04              |

## 5.3 Torsion angles [i](#)

### 5.3.1 Protein backbone [i](#)

In the following table, the Percentiles column shows the percent Ramachandran outliers of the chain as a percentile score with respect to all X-ray entries followed by that with respect to entries of similar resolution.

The Analysed column shows the number of residues for which the backbone conformation was analysed, and the total number of residues.

| Mol | Chain | Analysed       | Favoured  | Allowed | Outliers | Percentiles |
|-----|-------|----------------|-----------|---------|----------|-------------|
| 1   | A     | 241/257 (94%)  | 234 (97%) | 4 (2%)  | 3 (1%)   | 13 3        |
| 1   | B     | 219/257 (85%)  | 217 (99%) | 2 (1%)  | 0        | 100 100     |
| 1   | C     | 233/257 (91%)  | 226 (97%) | 5 (2%)  | 2 (1%)   | 17 5        |
| 1   | D     | 214/257 (83%)  | 210 (98%) | 3 (1%)  | 1 (0%)   | 29 13       |
| All | All   | 907/1028 (88%) | 887 (98%) | 14 (2%) | 6 (1%)   | 22 8        |

All (6) Ramachandran outliers are listed below:

| Mol | Chain | Res | Type |
|-----|-------|-----|------|
| 1   | A     | 336 | PRO  |
| 1   | C     | 466 | LEU  |
| 1   | D     | 421 | MET  |
| 1   | A     | 465 | THR  |
| 1   | C     | 420 | GLY  |
| 1   | A     | 464 | SER  |

### 5.3.2 Protein sidechains [i](#)

In the following table, the Percentiles column shows the percent sidechain outliers of the chain as a percentile score with respect to all X-ray entries followed by that with respect to entries of similar resolution.

The Analysed column shows the number of residues for which the sidechain conformation was analysed, and the total number of residues.

| Mol | Chain | Analysed      | Rotameric | Outliers | Percentiles |    |
|-----|-------|---------------|-----------|----------|-------------|----|
| 1   | A     | 218/232 (94%) | 211 (97%) | 7 (3%)   | 39          | 20 |
| 1   | B     | 204/232 (88%) | 195 (96%) | 9 (4%)   | 28          | 11 |
| 1   | C     | 213/232 (92%) | 210 (99%) | 3 (1%)   | 67          | 53 |
| 1   | D     | 198/232 (85%) | 190 (96%) | 8 (4%)   | 31          | 13 |
| All | All   | 833/928 (90%) | 806 (97%) | 27 (3%)  | 39          | 20 |

All (27) residues with a non-rotameric sidechain are listed below:

| Mol | Chain | Res | Type |
|-----|-------|-----|------|
| 1   | A     | 342 | MET  |
| 1   | A     | 358 | ILE  |
| 1   | A     | 425 | PHE  |
| 1   | A     | 437 | MET  |
| 1   | A     | 531 | LYS  |
| 1   | A     | 534 | VAL  |
| 1   | A     | 538 | ASP  |
| 1   | B     | 330 | GLU  |
| 1   | B     | 331 | TYR  |
| 1   | B     | 348 | ASN  |
| 1   | B     | 423 | GLU  |
| 1   | B     | 462 | LEU  |
| 1   | B     | 497 | LEU  |
| 1   | B     | 523 | GLU  |
| 1   | B     | 534 | VAL  |
| 1   | B     | 544 | LEU  |

*Continued on next page...*

Continued from previous page...

| Mol | Chain | Res | Type |
|-----|-------|-----|------|
| 1   | C     | 358 | ILE  |
| 1   | C     | 425 | PHE  |
| 1   | C     | 466 | LEU  |
| 1   | D     | 306 | LEU  |
| 1   | D     | 348 | ASN  |
| 1   | D     | 414 | GLN  |
| 1   | D     | 423 | GLU  |
| 1   | D     | 437 | MET  |
| 1   | D     | 523 | GLU  |
| 1   | D     | 531 | LYS  |
| 1   | D     | 534 | VAL  |

Some sidechains can be flipped to improve hydrogen bonding and reduce clashes. All (10) such sidechains are listed below:

| Mol | Chain | Res | Type |
|-----|-------|-----|------|
| 1   | A     | 398 | HIS  |
| 1   | A     | 519 | ASN  |
| 1   | A     | 524 | HIS  |
| 1   | B     | 373 | HIS  |
| 1   | B     | 519 | ASN  |
| 1   | C     | 398 | HIS  |
| 1   | C     | 488 | HIS  |
| 1   | C     | 519 | ASN  |
| 1   | C     | 524 | HIS  |
| 1   | D     | 519 | ASN  |

### 5.3.3 RNA [i](#)

There are no RNA molecules in this entry.

### 5.4 Non-standard residues in protein, DNA, RNA chains [i](#)

There are no non-standard protein/DNA/RNA residues in this entry.

### 5.5 Carbohydrates [i](#)

There are no monosaccharides in this entry.

## 5.6 Ligand geometry

Of 4 ligands modelled in this entry, 4 could not be matched to an existing wwPDB Chemical Component Dictionary definition at this stage - leaving 0 for Mogul analysis.

There are no bond length outliers.

There are no bond angle outliers.

There are no chirality outliers.

There are no torsion outliers.

There are no ring outliers.

No monomer is involved in short contacts.

The following is a two-dimensional graphical depiction of Mogul quality analysis of bond lengths, bond angles, torsion angles, and ring geometry for all instances of the Ligand of Interest. In addition, ligands with molecular weight > 250 and outliers as shown on the validation Tables will also be included. For torsion angles, if less than 5% of the Mogul distribution of torsion angles is within 10 degrees of the torsion angle in question, then that torsion angle is considered an outlier. Any bond that is central to one or more torsion angles identified as an outlier by Mogul will be highlighted in the graph. For rings, the root-mean-square deviation (RMSD) between the ring in question and similar rings identified by Mogul is calculated over all ring torsion angles. If the average RMSD is greater than 60 degrees and the minimal RMSD between the ring in question and any Mogul-identified rings is also greater than 60 degrees, then that ring is considered an outlier. The outliers are highlighted in purple. The color gray indicates Mogul did not find sufficient equivalents in the CSD to analyse the geometry.

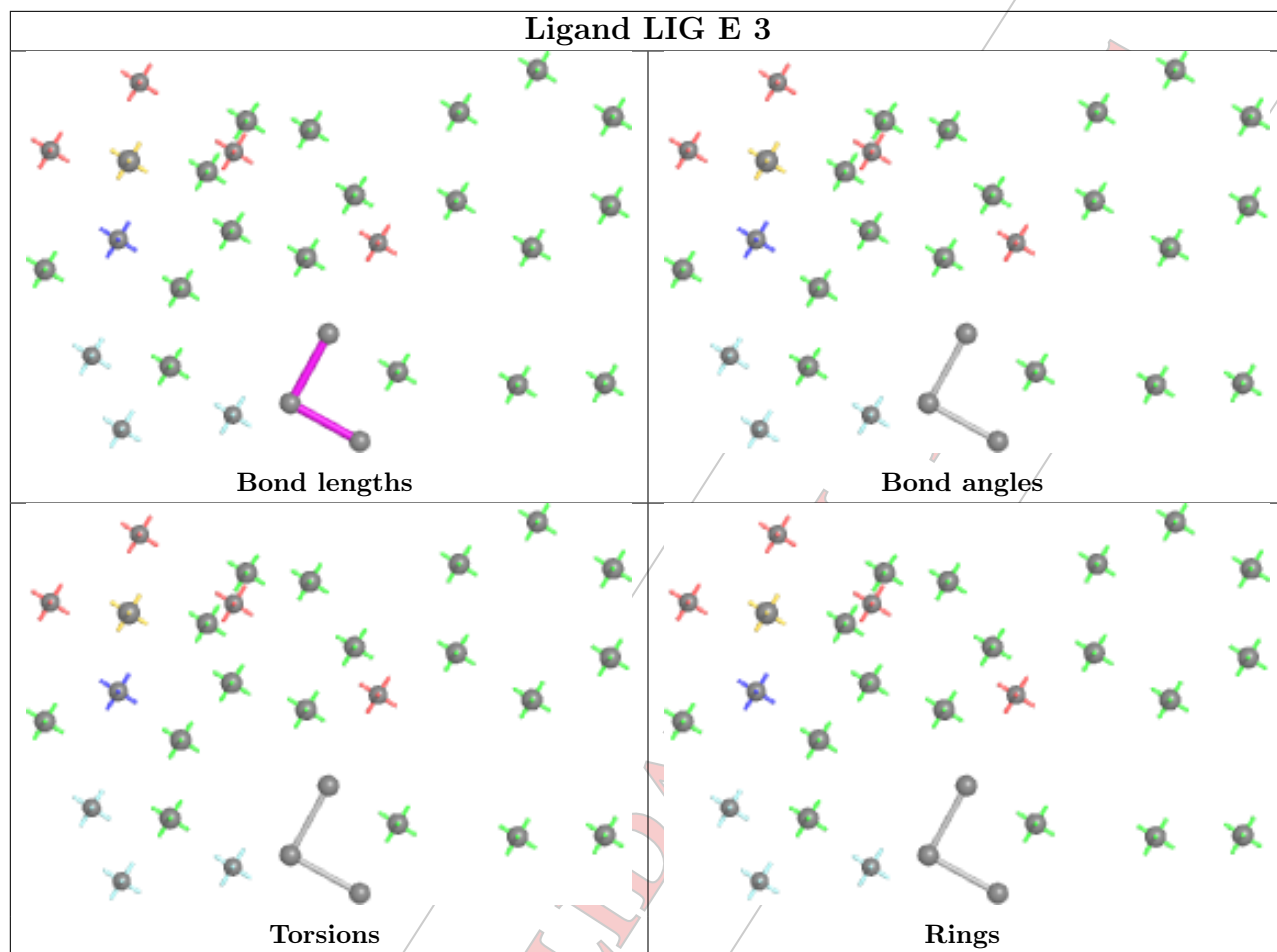

PRELIMINARY VALIDATION

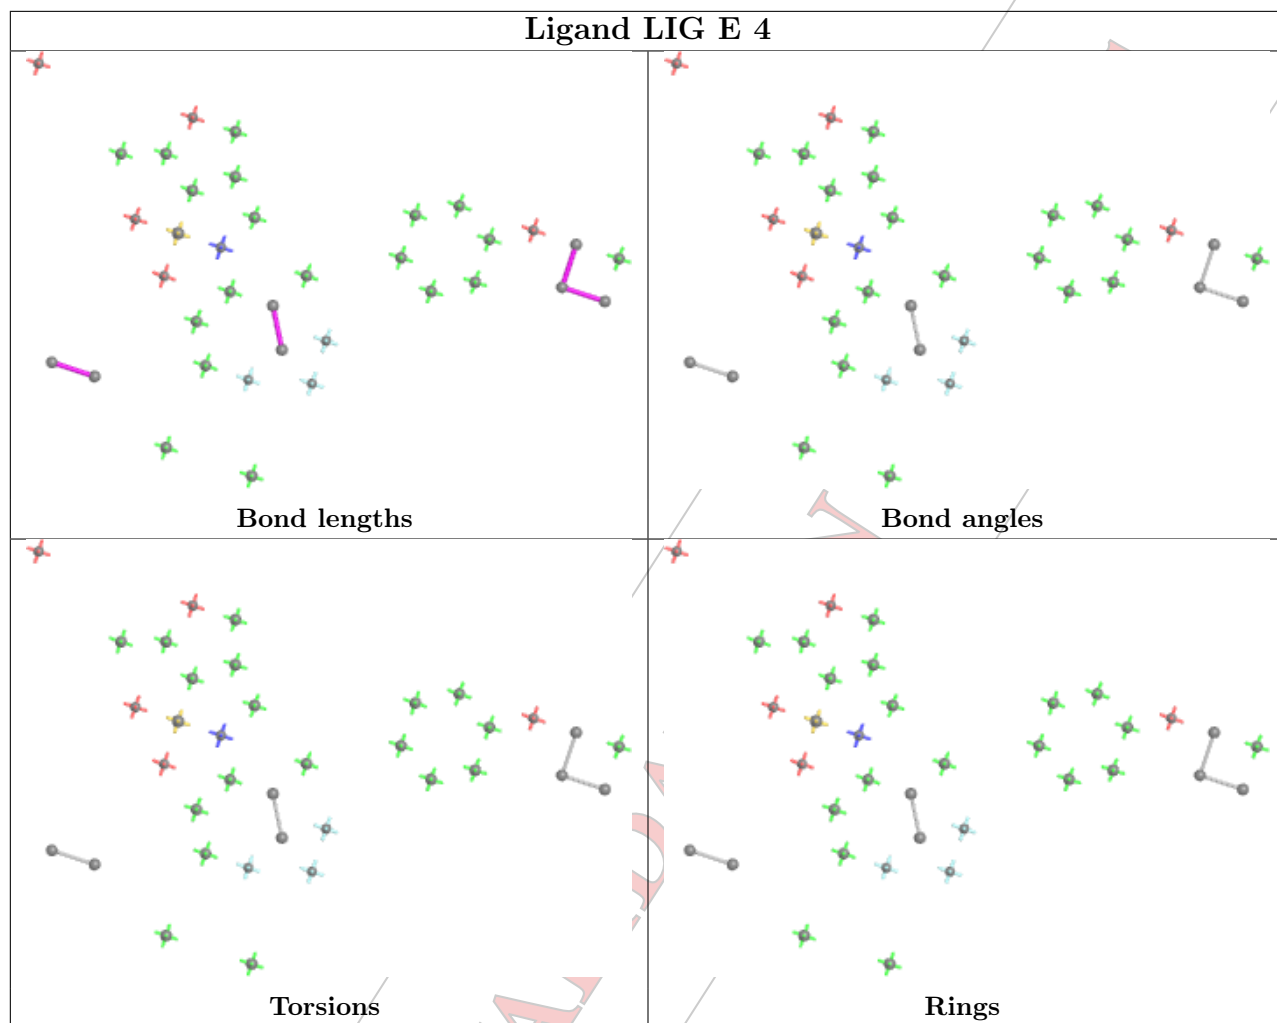

PRELIMINARY VALIDATION

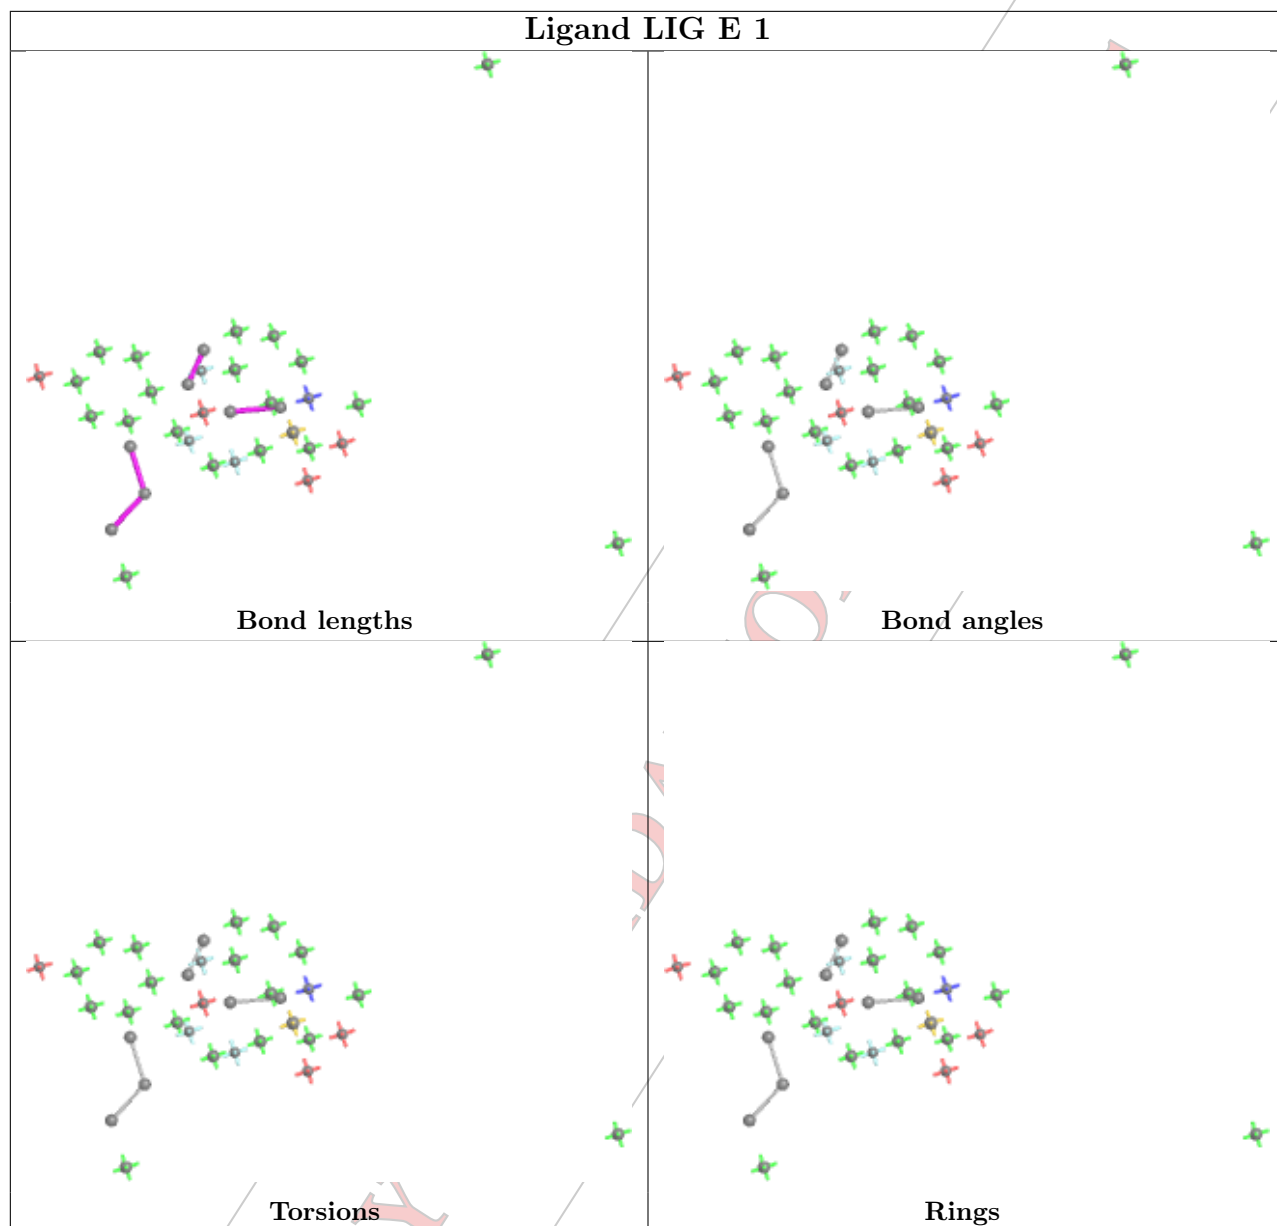

PRELIMINARY

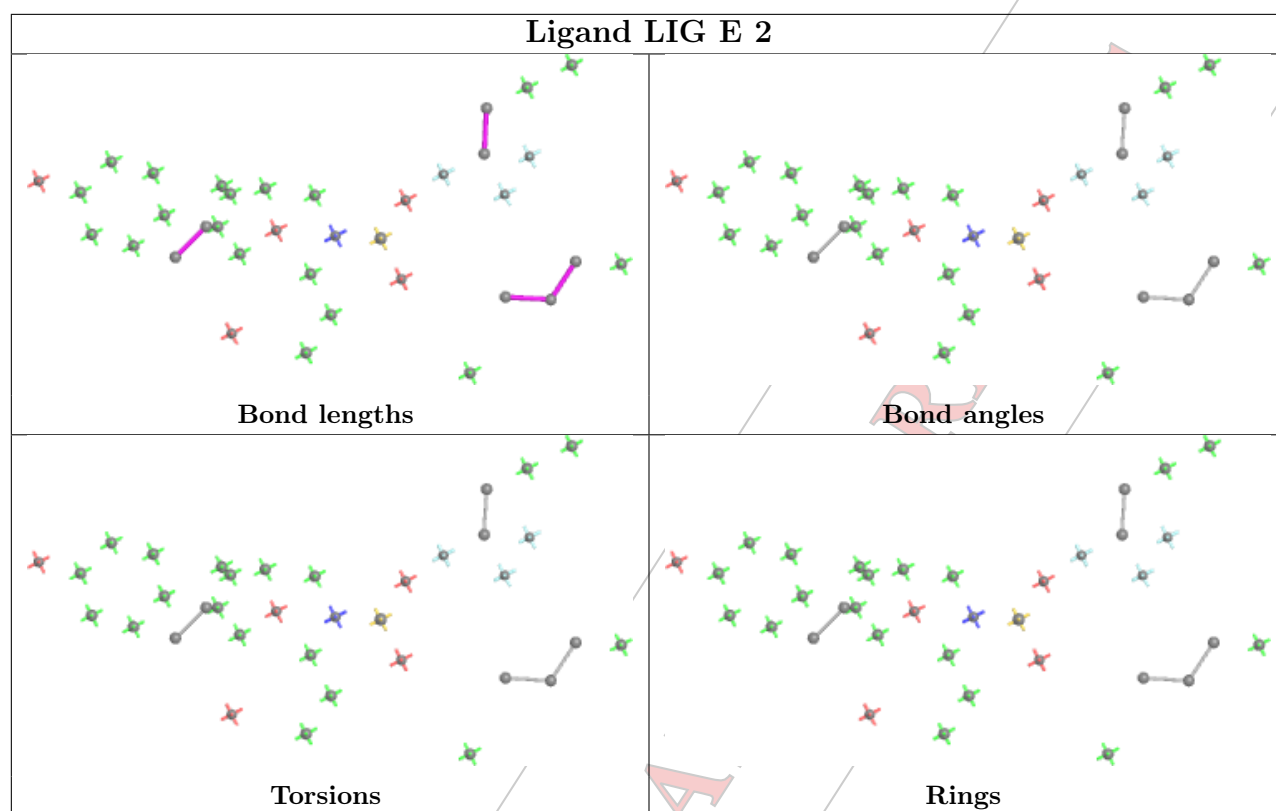

## 5.7 Other polymers [i](#)

There are no such residues in this entry.

## 5.8 Polymer linkage issues [i](#)

There are no chain breaks in this entry.

PRELIMINARY VALIDATION



## 6 Fit of model and data i

### 6.1 Protein, DNA and RNA chains i

In the following table, the column labelled '#RSRZ > 2' contains the number (and percentage) of RSRZ outliers, followed by percent RSRZ outliers for the chain as percentile scores relative to all X-ray entries and entries of similar resolution. The OWAB column contains the minimum, median, 95<sup>th</sup> percentile and maximum values of the occupancy-weighted average B-factor per residue. The column labelled 'Q < 0.9' lists the number of (and percentage) of residues with an average occupancy less than 0.9.

| Mol | Chain | Analysed       | <RSRZ> | #RSRZ>2       | OWAB(Å <sup>2</sup> ) | Q<0.9 |
|-----|-------|----------------|--------|---------------|-----------------------|-------|
| 1   | A     | 242/257 (94%)  | 0.68   | 29 (11%) 4 5  | 17, 36, 78, 114       | 0     |
| 1   | B     | 225/257 (87%)  | 0.45   | 11 (4%) 29 33 | 18, 34, 68, 92        | 0     |
| 1   | C     | 236/257 (91%)  | 0.58   | 20 (8%) 10 12 | 18, 33, 79, 126       | 0     |
| 1   | D     | 222/257 (86%)  | 0.50   | 19 (8%) 10 12 | 19, 33, 74, 96        | 0     |
| All | All   | 925/1028 (89%) | 0.56   | 79 (8%) 10 12 | 17, 34, 77, 126       | 0     |

All (79) RSRZ outliers are listed below:

| Mol | Chain | Res | Type | RSRZ |
|-----|-------|-----|------|------|
| 1   | C     | 526 | TYR  | 8.5  |
| 1   | C     | 464 | SER  | 8.2  |
| 1   | C     | 462 | LEU  | 7.5  |
| 1   | A     | 462 | LEU  | 7.1  |
| 1   | A     | 530 | CYS  | 6.8  |
| 1   | C     | 420 | GLY  | 6.4  |
| 1   | A     | 464 | SER  | 6.3  |
| 1   | B     | 546 | ALA  | 6.0  |
| 1   | D     | 420 | GLY  | 5.9  |
| 1   | A     | 463 | SER  | 5.4  |
| 1   | D     | 546 | ALA  | 5.4  |
| 1   | D     | 461 | PHE  | 5.2  |
| 1   | A     | 305 | SER  | 4.6  |
| 1   | A     | 466 | LEU  | 4.5  |
| 1   | D     | 545 | ASP  | 4.4  |
| 1   | D     | 305 | SER  | 3.9  |
| 1   | B     | 331 | TYR  | 3.9  |
| 1   | C     | 463 | SER  | 3.9  |
| 1   | A     | 418 | VAL  | 3.8  |
| 1   | C     | 421 | MET  | 3.7  |
| 1   | B     | 413 | ASN  | 3.6  |

*Continued on next page...*

*Continued from previous page...*

| Mol | Chain | Res | Type | RSRZ |
|-----|-------|-----|------|------|
| 1   | A     | 304 | ASN  | 3.6  |
| 1   | D     | 467 | LYS  | 3.6  |
| 1   | C     | 305 | SER  | 3.5  |
| 1   | B     | 530 | CYS  | 3.5  |
| 1   | A     | 437 | MET  | 3.5  |
| 1   | C     | 461 | PHE  | 3.5  |
| 1   | A     | 526 | TYR  | 3.4  |
| 1   | A     | 332 | ASP  | 3.4  |
| 1   | A     | 306 | LEU  | 3.4  |
| 1   | A     | 417 | CYS  | 3.4  |
| 1   | A     | 528 | MET  | 3.3  |
| 1   | D     | 422 | VAL  | 3.2  |
| 1   | B     | 526 | TYR  | 3.2  |
| 1   | A     | 421 | MET  | 3.2  |
| 1   | D     | 534 | VAL  | 3.1  |
| 1   | B     | 462 | LEU  | 3.1  |
| 1   | C     | 524 | HIS  | 3.1  |
| 1   | D     | 415 | GLY  | 3.0  |
| 1   | C     | 528 | MET  | 3.0  |
| 1   | A     | 461 | PHE  | 2.9  |
| 1   | D     | 468 | SER  | 2.9  |
| 1   | B     | 545 | ASP  | 2.9  |
| 1   | D     | 413 | ASN  | 2.8  |
| 1   | D     | 421 | MET  | 2.8  |
| 1   | A     | 413 | ASN  | 2.8  |
| 1   | A     | 330 | GLU  | 2.8  |
| 1   | A     | 415 | GLY  | 2.7  |
| 1   | C     | 465 | THR  | 2.7  |
| 1   | A     | 524 | HIS  | 2.7  |
| 1   | A     | 492 | LYS  | 2.7  |
| 1   | C     | 460 | THR  | 2.7  |
| 1   | D     | 459 | TYR  | 2.6  |
| 1   | B     | 524 | HIS  | 2.6  |
| 1   | A     | 532 | ASN  | 2.6  |
| 1   | C     | 469 | LEU  | 2.6  |
| 1   | A     | 416 | LYS  | 2.5  |
| 1   | C     | 425 | PHE  | 2.5  |
| 1   | D     | 544 | LEU  | 2.5  |
| 1   | C     | 437 | MET  | 2.5  |
| 1   | C     | 332 | ASP  | 2.4  |
| 1   | A     | 308 | LEU  | 2.4  |
| 1   | D     | 460 | THR  | 2.4  |

*Continued on next page...*

Continued from previous page...

| Mol | Chain | Res | Type | RSRZ |
|-----|-------|-----|------|------|
| 1   | A     | 531 | LYS  | 2.3  |
| 1   | A     | 331 | TYR  | 2.3  |
| 1   | A     | 469 | LEU  | 2.3  |
| 1   | C     | 466 | LEU  | 2.2  |
| 1   | A     | 468 | SER  | 2.2  |
| 1   | D     | 419 | GLU  | 2.2  |
| 1   | A     | 525 | LEU  | 2.1  |
| 1   | C     | 306 | LEU  | 2.1  |
| 1   | C     | 418 | VAL  | 2.1  |
| 1   | D     | 306 | LEU  | 2.1  |
| 1   | D     | 409 | LEU  | 2.1  |
| 1   | B     | 342 | MET  | 2.1  |
| 1   | B     | 501 | HIS  | 2.1  |
| 1   | C     | 525 | LEU  | 2.0  |
| 1   | B     | 423 | GLU  | 2.0  |
| 1   | D     | 469 | LEU  | 2.0  |

## 6.2 Non-standard residues in protein, DNA, RNA chains [i](#)

There are no non-standard protein/DNA/RNA residues in this entry.

## 6.3 Carbohydrates [i](#)

There are no monosaccharides in this entry.

## 6.4 Ligands [i](#)

In the following table, the Atoms column lists the number of modelled atoms in the group and the number defined in the chemical component dictionary. The B-factors column lists the minimum, median, 95<sup>th</sup> percentile and maximum values of B factors of atoms in the group. The column labelled 'Q< 0.9' lists the number of atoms with occupancy less than 0.9.

| Mol | Type | Chain | Res | Atoms | RSCC | RSR  | B-factors(Å <sup>2</sup> ) | Q<0.9 |
|-----|------|-------|-----|-------|------|------|----------------------------|-------|
| 2   | LIG  | E     | 1   | 36/?  | 0.89 | 0.15 | 30,58,129,171              | 0     |
| 2   | LIG  | E     | 2   | 37/?  | 0.89 | 0.14 | 27,53,78,83                | 0     |
| 2   | LIG  | E     | 3   | 31/?  | 0.90 | 0.11 | 27,45,125,136              | 0     |
| 2   | LIG  | E     | 4   | 37/?  | 0.91 | 0.12 | 22,44,71,77                | 0     |

The following is a graphical depiction of the model fit to experimental electron density of all instances of the Ligand of Interest. In addition, ligands with molecular weight > 250 and outliers

as shown on the geometry validation Tables will also be included. Each fit is shown from different orientation to approximate a three-dimensional view.

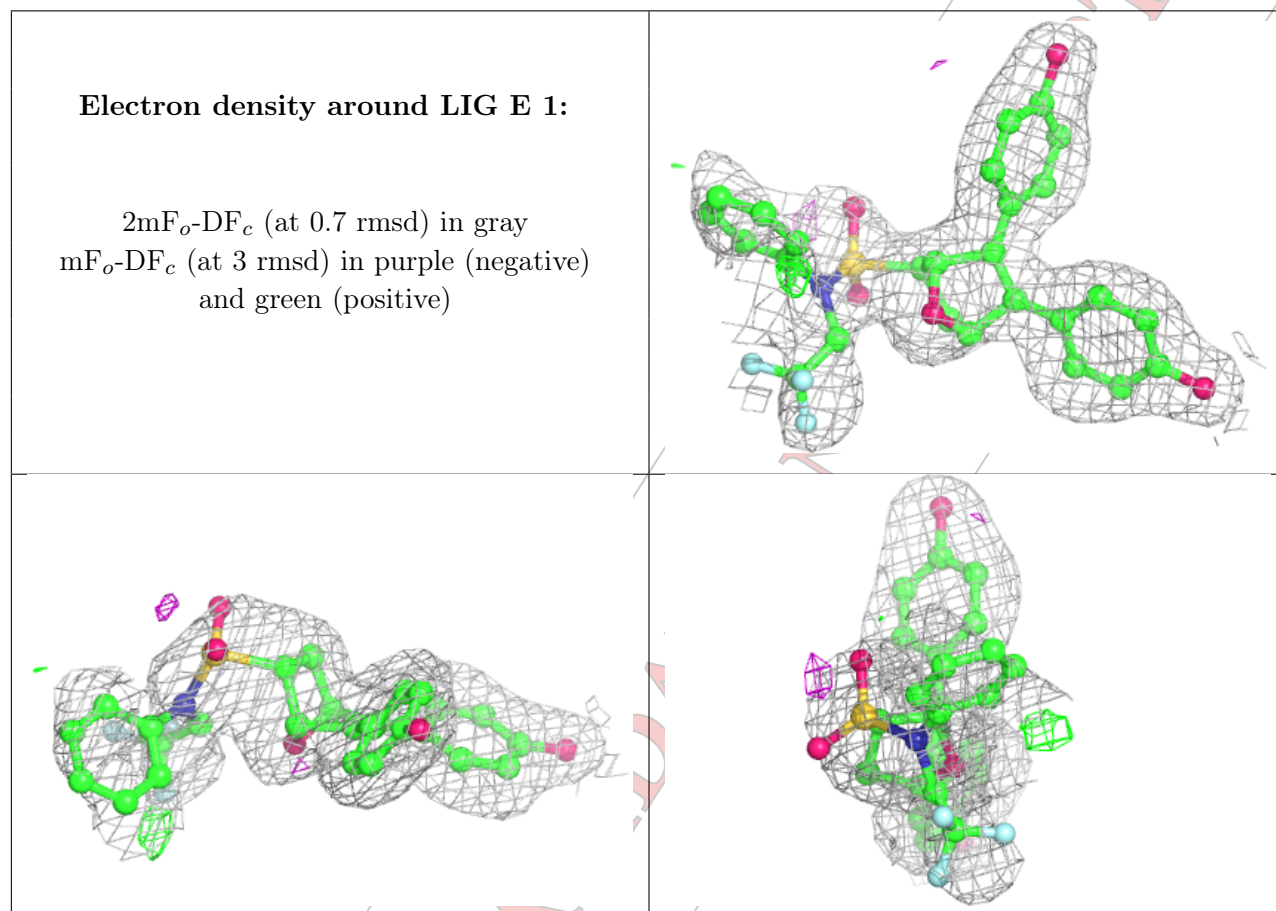

PRELIMINARY VA

**Electron density around LIG E 2:**

$2mF_o-DF_c$  (at 0.7 rmsd) in gray  
 $mF_o-DF_c$  (at 3 rmsd) in purple (negative)  
and green (positive)

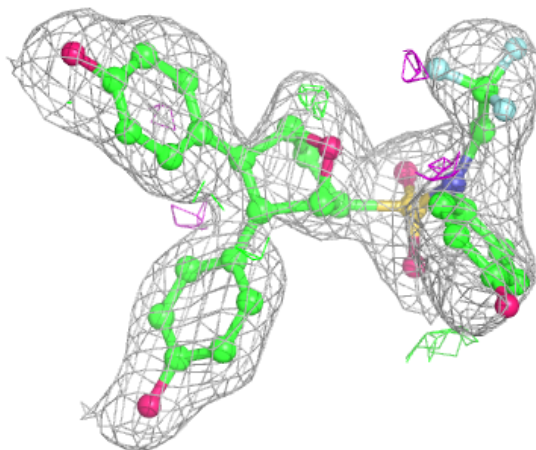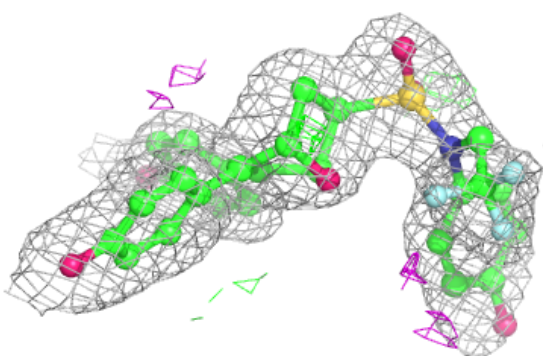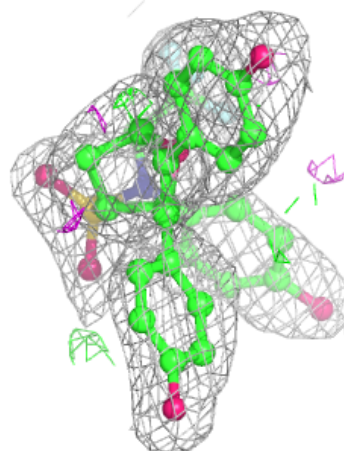

PRELIMINARY VALIDATION

**Electron density around LIG E 3:**

$2mF_o-DF_c$  (at 0.7 rmsd) in gray  
 $mF_o-DF_c$  (at 3 rmsd) in purple (negative)  
and green (positive)

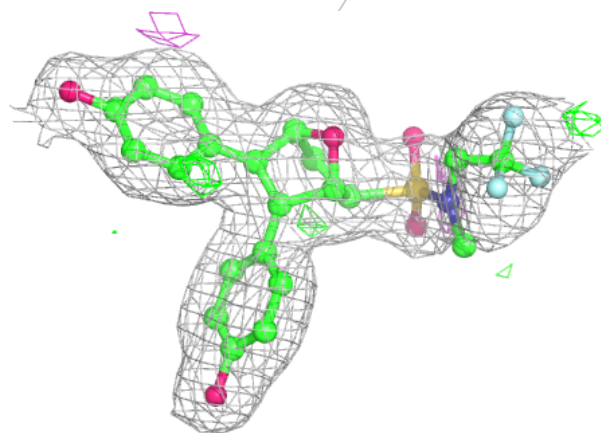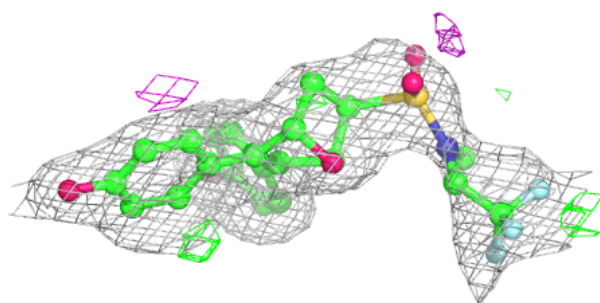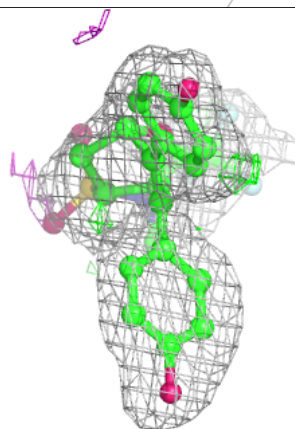

PRELIMINARY VALIDATION

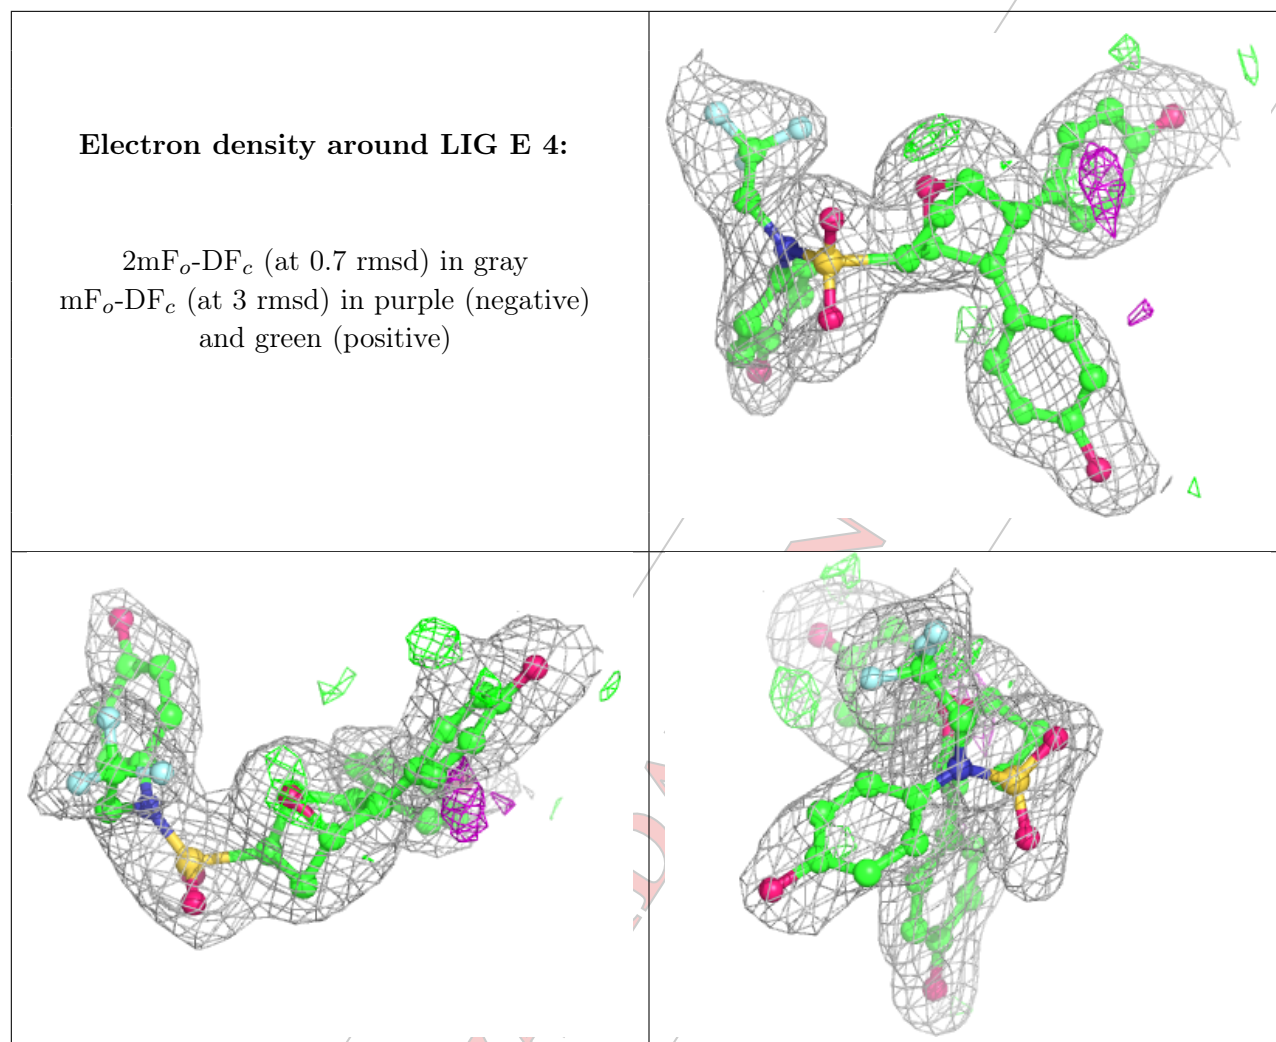

## 6.5 Other polymers [\(i\)](#)

There are no such residues in this entry.

PRELIMINARY



# Preliminary Full wwPDB X-ray Structure Validation Report ⓘ

Aug 9, 2020 – 10:51 PM EDT

Deposition ID : D\_1000251221

This is a Preliminary Full wwPDB X-ray Structure Validation Report.

This report is produced by the wwPDB Deposition System during initial deposition but before annotation of the structure.

We welcome your comments at [validation@mail.wwpdb.org](mailto:validation@mail.wwpdb.org)

A user guide is available at

<https://www.wwpdb.org/validation/2017/XrayValidationReportHelp>

with specific help available everywhere you see the ⓘ symbol.

---

The following versions of software and data (see [references ⓘ](#)) were used in the production of this report:

|                                |   |                                                                    |
|--------------------------------|---|--------------------------------------------------------------------|
| MolProbity                     | : | 4.02b-467                                                          |
| Mogul                          | : | 1.8.5 (274361), CSD as541be (2020)                                 |
| Xtriage (Phenix)               | : | 1.13                                                               |
| EDS                            | : | 2.13.1                                                             |
| buster-report                  | : | 1.1.7 (2018)                                                       |
| Percentile statistics          | : | 20191225.v01 (using entries in the PDB archive December 25th 2019) |
| Refmac                         | : | 5.8.0158                                                           |
| CCP4                           | : | 7.0.044 (Gargrove)                                                 |
| Ideal geometry (proteins)      | : | Engh & Huber (2001)                                                |
| Ideal geometry (DNA, RNA)      | : | Parkinson et al. (1996)                                            |
| Validation Pipeline (wwPDB-VP) | : | 2.13.1                                                             |



# 1 Overall quality at a glance i

The following experimental techniques were used to determine the structure:  
*X-RAY DIFFRACTION*

The reported resolution of this entry is 1.84 Å.

Percentile scores (ranging between 0-100) for global validation metrics of the entry are shown in the following graphic. The table shows the number of entries on which the scores are based.

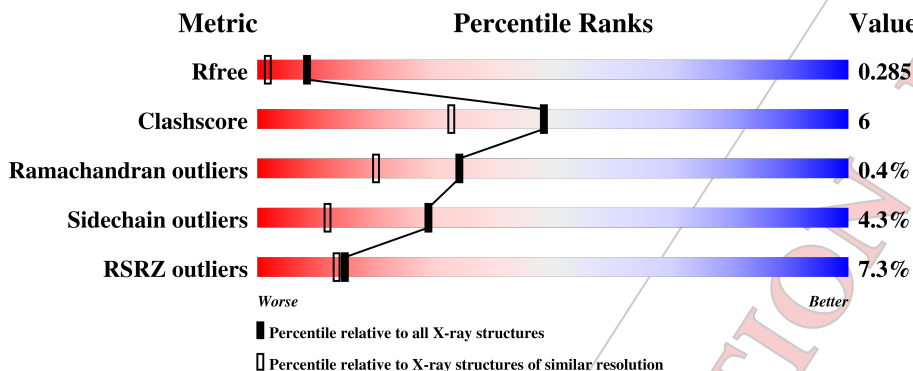

| Metric                | Whole archive<br>(#Entries) | Similar resolution<br>(#Entries, resolution range(Å)) |
|-----------------------|-----------------------------|-------------------------------------------------------|
| $R_{free}$            | 130704                      | 4003 (1.86-1.82)                                      |
| Clashscore            | 141614                      | 4233 (1.86-1.82)                                      |
| Ramachandran outliers | 138981                      | 4185 (1.86-1.82)                                      |
| Sidechain outliers    | 138945                      | 4186 (1.86-1.82)                                      |
| RSRZ outliers         | 127900                      | 3957 (1.86-1.82)                                      |

The table below summarises the geometric issues observed across the polymeric chains and their fit to the electron density. The red, orange, yellow and green segments on the lower bar indicate the fraction of residues that contain outliers for  $\geq 3$ , 2, 1 and 0 types of geometric quality criteria respectively. A grey segment represents the fraction of residues that are not modelled. The numeric value for each fraction is indicated below the corresponding segment, with a dot representing fractions  $\leq 5\%$ . The upper red bar (where present) indicates the fraction of residues that have poor fit to the electron density. The numeric value is given above the bar.

| Mol | Chain | Length | Quality of chain     |
|-----|-------|--------|----------------------|
| 1   | A     | 257    | <br>8% 69% 16% • 13% |
| 1   | B     | 257    | <br>5% 73% 9% • 18%  |
| 1   | C     | 257    | <br>2% 71% 5% 23%    |
| 1   | D     | 257    | <br>9% 77% 13% •• 8% |

## 2 Entry composition i

There are 6 unique types of molecules in this entry. The entry contains 7212 atoms, of which 0 are hydrogens and 0 are deuteriums.

In the tables below, the ZeroOcc column contains the number of atoms modelled with zero occupancy, the AltConf column contains the number of residues with at least one atom in alternate conformation and the Trace column contains the number of residues modelled with at most 2 atoms.

- Molecule 1 is a protein called Estrogen Receptor.

| Mol | Chain | Residues | Atoms         |           |          |          |         | ZeroOcc | AltConf | Trace |
|-----|-------|----------|---------------|-----------|----------|----------|---------|---------|---------|-------|
|     |       |          | Total         | C         | N        | O        | S       |         |         |       |
| 1   | A     | 223      | Total<br>1779 | C<br>1138 | N<br>302 | O<br>321 | S<br>18 | 0       | 1       | 0     |
| 1   | B     | 212      | Total<br>1681 | C<br>1074 | N<br>292 | O<br>299 | S<br>16 | 0       | 0       | 0     |
| 1   | C     | 198      | Total<br>1591 | C<br>1017 | N<br>276 | O<br>284 | S<br>14 | 0       | 1       | 0     |
| 1   | D     | 237      | Total<br>1890 | C<br>1208 | N<br>321 | O<br>343 | S<br>18 | 0       | 0       | 0     |

- Molecule 2 is a ligand with the chemical component id LIG but its atom names do not match the existing wwPDB Chemical Component Dictionary definition for LIG. Consequently no firm identification of ligand chemistry can be made. Once the structure is annotated then an identification and diagram will be given here.

| Mol | Chain | Residues | Atoms       |         |        |        |        | ZeroOcc | AltConf |   |
|-----|-------|----------|-------------|---------|--------|--------|--------|---------|---------|---|
|     |       |          | Total       | C       | F      | N      | O      |         |         | S |
| 2   | A     | 1        | Total<br>45 | C<br>34 | F<br>3 | N<br>1 | O<br>6 | S<br>1  | 0       | 0 |
| 2   | B     | 1        | Total<br>45 | C<br>34 | F<br>3 | N<br>1 | O<br>6 | S<br>1  | 0       | 0 |
| 2   | C     | 1        | Total<br>45 | C<br>34 | F<br>3 | N<br>1 | O<br>6 | S<br>1  | 0       | 0 |
| 2   | D     | 1        | Total<br>45 | C<br>34 | F<br>3 | N<br>1 | O<br>6 | S<br>1  | 0       | 0 |

- Molecule 3 is TYROSINE (three-letter code: TYR) (formula: C<sub>9</sub>H<sub>11</sub>NO<sub>3</sub>).

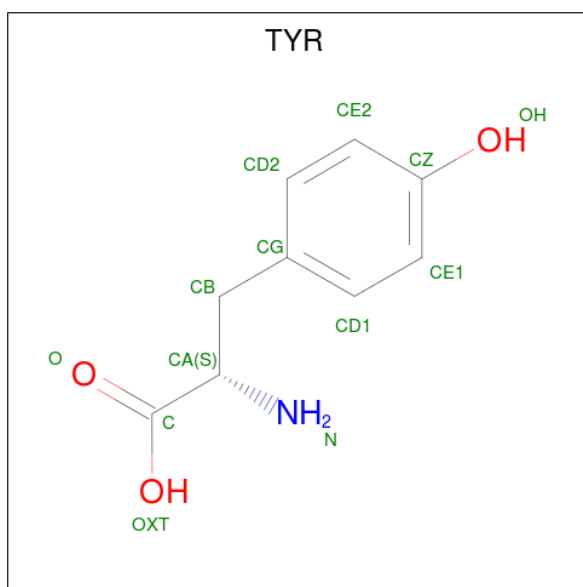

| Mol | Chain | Residues | Atoms |   |   |   | ZeroOcc | AltConf |
|-----|-------|----------|-------|---|---|---|---------|---------|
|     |       |          | Total | C | N | O |         |         |
| 3   | B     | 1        | 5     | 3 | 1 | 1 | 0       | 0       |
| 3   | C     | 1        | 5     | 3 | 1 | 1 | 0       | 0       |

- Molecule 4 is SERINE (three-letter code: SER) (formula:  $C_3H_7NO_3$ ).

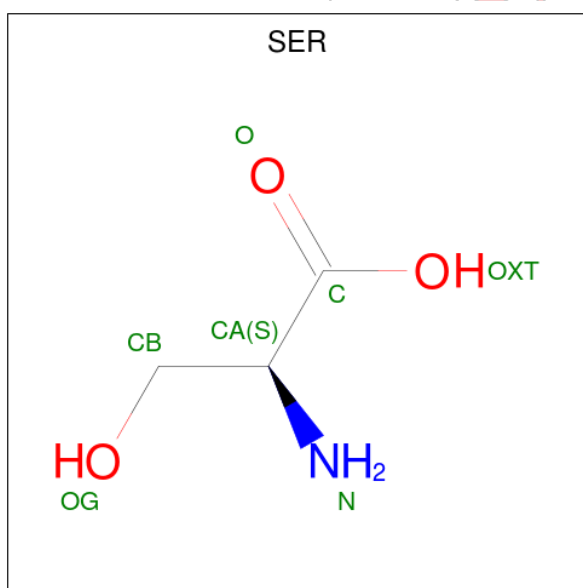

| Mol | Chain | Residues | Atoms |   |   |   | ZeroOcc | AltConf |
|-----|-------|----------|-------|---|---|---|---------|---------|
|     |       |          | Total | C | N | O |         |         |
| 4   | B     | 1        | 5     | 3 | 1 | 1 | 0       | 0       |

- Molecule 5 is CYSTEINE (three-letter code: CYS) (formula:  $C_3H_7NO_2S$ ).

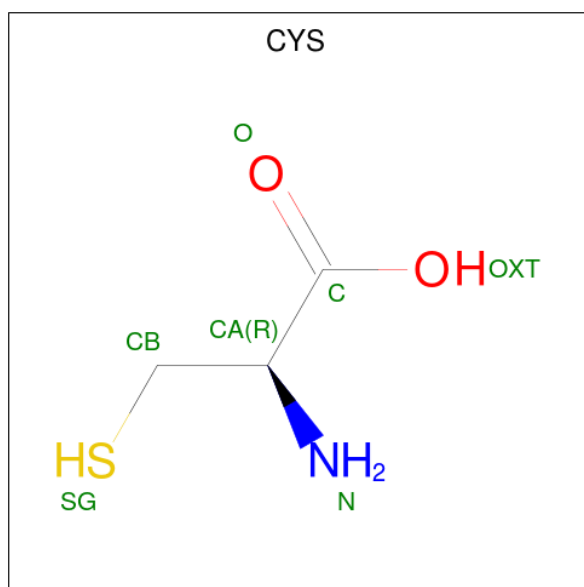

| Mol | Chain | Residues | Atoms |   |   | ZeroOcc | AltConf |   |
|-----|-------|----------|-------|---|---|---------|---------|---|
|     |       |          | Total | C | N |         |         | O |
| 5   | B     | 1        | 5     | 3 | 1 | 1       | 0       | 0 |

- Molecule 6 is water.

| Mol | Chain | Residues | Atoms |    | ZeroOcc | AltConf |
|-----|-------|----------|-------|----|---------|---------|
|     |       |          | Total | O  |         |         |
| 6   | S     | 71       | 71    | 71 | 0       | 0       |

### 3 Residue-property plots

These plots are drawn for all protein, RNA, DNA and oligosaccharide chains in the entry. The first graphic for a chain summarises the proportions of the various outlier classes displayed in the second graphic. The second graphic shows the sequence view annotated by issues in geometry and electron density. Residues are color-coded according to the number of geometric quality criteria for which they contain at least one outlier: green = 0, yellow = 1, orange = 2 and red = 3 or more. A red dot above a residue indicates a poor fit to the electron density ( $RSRZ > 2$ ). Stretches of 2 or more consecutive residues without any outlier are shown as a green connector. Residues present in the sample, but not in the model, are shown in grey.

- Molecule 1: Estrogen Receptor

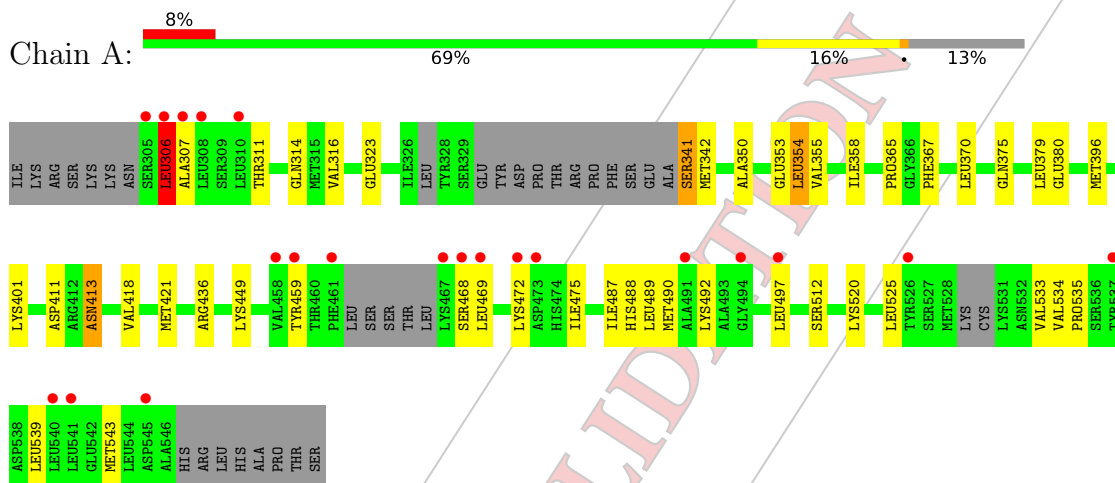

- Molecule 1: Estrogen Receptor

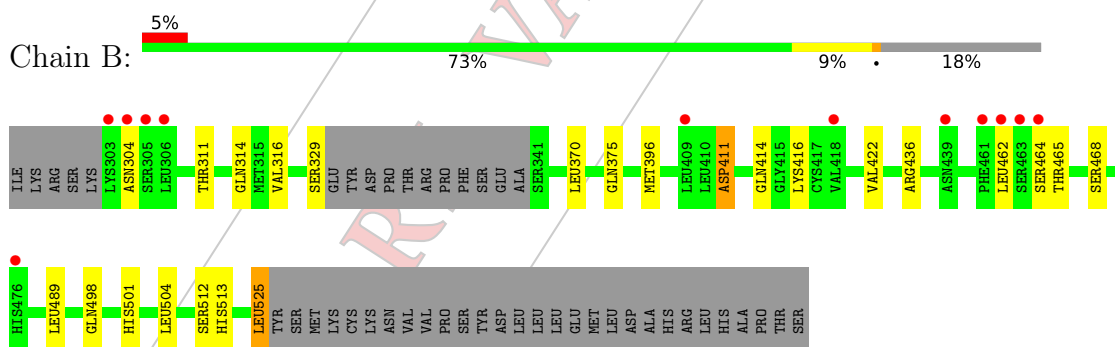

- Molecule 1: Estrogen Receptor

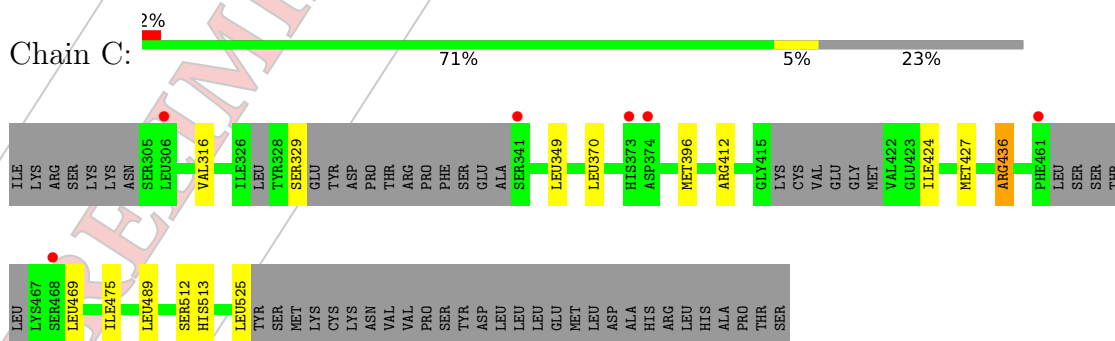



## 4 Data and refinement statistics i

| Property                                                                | Value                                                       | Source           |
|-------------------------------------------------------------------------|-------------------------------------------------------------|------------------|
| Space group                                                             | P 1                                                         | Depositor        |
| Cell constants<br>a, b, c, $\alpha$ , $\beta$ , $\gamma$                | 52.56Å 58.98Å 91.67Å<br>89.03° 74.59° 63.60°                | Depositor        |
| Resolution (Å)                                                          | 87.76 – 1.84<br>87.76 – 1.84                                | Depositor<br>EDS |
| % Data completeness<br>(in resolution range)                            | 51.0 (87.76-1.84)<br>51.0 (87.76-1.84)                      | Depositor<br>EDS |
| $R_{merge}$                                                             | (Not available)                                             | Depositor        |
| $R_{sym}$                                                               | (Not available)                                             | Depositor        |
| $\langle I/\sigma(I) \rangle$ <sup>1</sup>                              | 1.62 (at 1.84Å)                                             | Xtrriage         |
| Refinement program                                                      | REFMAC 5.8.0258                                             | Depositor        |
| R, $R_{free}$                                                           | 0.236 , 0.283<br>0.243 , 0.285                              | Depositor<br>DCC |
| $R_{free}$ test set                                                     | 2072 reflections (4.95%)                                    | wwPDB-VP         |
| Wilson B-factor (Å <sup>2</sup> )                                       | 28.3                                                        | Xtrriage         |
| Anisotropy                                                              | 0.088                                                       | Xtrriage         |
| Bulk solvent $k_{sol}$ (e/Å <sup>3</sup> ), $B_{sol}$ (Å <sup>2</sup> ) | 0.35 , 33.7                                                 | EDS              |
| L-test for twinning <sup>2</sup>                                        | $\langle  L  \rangle = 0.48$ , $\langle L^2 \rangle = 0.31$ | Xtrriage         |
| Estimated twinning fraction                                             | 0.209 for h,h-k,h-l                                         | Xtrriage         |
| $F_o, F_c$ correlation                                                  | 0.92                                                        | EDS              |
| Total number of atoms                                                   | 7212                                                        | wwPDB-VP         |
| Average B, all atoms (Å <sup>2</sup> )                                  | 42.0                                                        | wwPDB-VP         |

Xtrriage's analysis on translational NCS is as follows: *The largest off-origin peak in the Patterson function is 8.07% of the height of the origin peak. No significant pseudotranslation is detected.*

<sup>1</sup>Intensities estimated from amplitudes.

<sup>2</sup>Theoretical values of  $\langle |L| \rangle$ ,  $\langle L^2 \rangle$  for acentric reflections are 0.5, 0.333 respectively for untwinned datasets, and 0.375, 0.2 for perfectly twinned datasets.

## 5 Model quality [i](#)

### 5.1 Standard geometry [i](#)

Bond lengths and bond angles in the following residue types are not validated in this section: LIG, YCM

The Z score for a bond length (or angle) is the number of standard deviations the observed value is removed from the expected value. A bond length (or angle) with  $|Z| > 5$  is considered an outlier worth inspection. RMSZ is the root-mean-square of all Z scores of the bond lengths (or angles).

| Mol | Chain | Bond lengths |         | Bond angles |               |
|-----|-------|--------------|---------|-------------|---------------|
|     |       | RMSZ         | # Z  >5 | RMSZ        | # Z  >5       |
| 1   | A     | 0.54         | 0/1796  | 0.74        | 1/2419 (0.0%) |
| 1   | B     | 0.52         | 0/1698  | 0.73        | 0/2289        |
| 1   | C     | 0.52         | 0/1605  | 0.74        | 2/2160 (0.1%) |
| 1   | D     | 0.53         | 0/1913  | 0.73        | 0/2582        |
| All | All   | 0.53         | 0/7012  | 0.73        | 3/9450 (0.0%) |

Chiral center outliers are detected by calculating the chiral volume of a chiral center and verifying if the center is modelled as a planar moiety or with the opposite hand. A planarity outlier is detected by checking planarity of atoms in a peptide group, atoms in a mainchain group or atoms of a sidechain that are expected to be planar.

| Mol | Chain | #Chirality outliers | #Planarity outliers |
|-----|-------|---------------------|---------------------|
| 1   | B     | 0                   | 1                   |

There are no bond length outliers.

All (3) bond angle outliers are listed below:

| Mol | Chain | Res | Type | Atoms     | Z     | Observed(°) | Ideal(°) |
|-----|-------|-----|------|-----------|-------|-------------|----------|
| 1   | C     | 436 | ARG  | NE-CZ-NH1 | 6.17  | 123.38      | 120.30   |
| 1   | A     | 306 | LEU  | CA-CB-CG  | 6.03  | 129.16      | 115.30   |
| 1   | C     | 349 | LEU  | CB-CG-CD2 | -5.63 | 101.42      | 111.00   |

There are no chirality outliers.

All (1) planarity outliers are listed below:

| Mol | Chain | Res | Type | Group   |
|-----|-------|-----|------|---------|
| 1   | B     | 462 | LEU  | Peptide |



## 5.2 Too-close contacts [i](#)

In the following table, the Non-H and H(model) columns list the number of non-hydrogen atoms and hydrogen atoms in the chain respectively. The H(added) column lists the number of hydrogen atoms added and optimized by MolProbity. The Clashes column lists the number of clashes within the asymmetric unit, whereas Symm-Clashes lists symmetry related clashes.

| Mol | Chain | Non-H | H(model) | H(added) | Clashes | Symm-Clashes |
|-----|-------|-------|----------|----------|---------|--------------|
| 1   | A     | 1779  | 0        | 1812     | 34      | 0            |
| 1   | B     | 1681  | 0        | 1737     | 20      | 0            |
| 1   | C     | 1591  | 0        | 1629     | 7       | 0            |
| 1   | D     | 1890  | 0        | 1921     | 28      | 0            |
| 2   | A     | 45    | 0        | 1        | 2       | 0            |
| 2   | B     | 45    | 0        | 1        | 0       | 0            |
| 2   | C     | 45    | 0        | 1        | 0       | 0            |
| 2   | D     | 45    | 0        | 1        | 3       | 0            |
| 3   | B     | 5     | 0        | 1        | 0       | 0            |
| 3   | C     | 5     | 0        | 1        | 0       | 0            |
| 4   | B     | 5     | 0        | 2        | 0       | 0            |
| 5   | B     | 5     | 0        | 2        | 0       | 0            |
| 6   | S     | 71    | 0        | 0        | 2       | 0            |
| All | All   | 7212  | 0        | 7109     | 85      | 0            |

The all-atom clashscore is defined as the number of clashes found per 1000 atoms (including hydrogen atoms). The all-atom clashscore for this structure is 6.

All (85) close contacts within the same asymmetric unit are listed below, sorted by their clash magnitude.

| Atom-1           | Atom-2           | Interatomic distance (Å) | Clash overlap (Å) |
|------------------|------------------|--------------------------|-------------------|
| 1:D:447:CYS:HB3  | 1:D:486:LEU:HD21 | 1.58                     | 0.84              |
| 1:B:311:THR:H    | 1:B:314:GLN:HE21 | 1.26                     | 0.82              |
| 1:A:534:VAL:HG22 | 1:A:535:PRO:HD2  | 1.64                     | 0.80              |
| 1:A:367:PHE:HZ   | 1:A:379:LEU:CD2  | 1.99                     | 0.75              |
| 1:D:469:LEU:O    | 1:D:472:LYS:HG3  | 1.87                     | 0.75              |
| 1:A:367:PHE:CZ   | 1:A:379:LEU:CD2  | 2.70                     | 0.74              |
| 1:B:311:THR:H    | 1:B:314:GLN:NE2  | 1.85                     | 0.74              |
| 1:D:447:CYS:HB3  | 1:D:486:LEU:CD2  | 2.17                     | 0.73              |
| 1:A:358:ILE:HD13 | 1:A:543:MET:HE2  | 1.69                     | 0.73              |
| 1:D:358:ILE:HD13 | 1:D:543:MET:HE2  | 1.71                     | 0.71              |
| 1:A:367:PHE:CZ   | 1:A:379:LEU:HD21 | 2.26                     | 0.71              |
| 1:D:487:ILE:HD13 | 1:D:490:MET:CE   | 2.24                     | 0.67              |
| 1:A:487:ILE:HD13 | 1:A:490:MET:CE   | 2.25                     | 0.67              |
| 1:B:504:LEU:C    | 1:B:504:LEU:HD13 | 2.14                     | 0.66              |

*Continued on next page...*

*Continued from previous page...*

| Atom-1           | Atom-2           | Interatomic distance (Å) | Clash overlap (Å) |
|------------------|------------------|--------------------------|-------------------|
| 1:A:342:MET:HE3  | 1:A:418:VAL:HG23 | 1.79                     | 0.63              |
| 1:B:465:THR:HG23 | 1:B:468:SER:HB2  | 1.81                     | 0.63              |
| 1:A:534:VAL:CG2  | 1:A:535:PRO:HD2  | 2.28                     | 0.63              |
| 1:A:342:MET:CE   | 1:A:418:VAL:HG23 | 2.31                     | 0.61              |
| 1:D:447:CYS:CB   | 1:D:486:LEU:HD21 | 2.31                     | 0.60              |
| 1:A:367:PHE:HZ   | 1:A:379:LEU:HD23 | 1.67                     | 0.58              |
| 1:A:306:LEU:H    | 1:A:306:LEU:HD22 | 1.70                     | 0.57              |
| 1:A:375:GLN:O    | 1:A:379:LEU:HD23 | 2.05                     | 0.56              |
| 1:B:416:LYS:HA   | 1:B:422:VAL:HG22 | 1.86                     | 0.56              |
| 1:C:424:ILE:HD13 | 1:C:427:MET:CE   | 2.36                     | 0.55              |
| 1:A:396:MET:O    | 1:A:436:ARG:HD3  | 2.06                     | 0.55              |
| 1:A:468:SER:O    | 1:A:472:LYS:HD3  | 2.06                     | 0.55              |
| 1:D:525:LEU:HD21 | 1:D:534:VAL:CG2  | 2.36                     | 0.55              |
| 1:D:534:VAL:HG13 | 1:D:535:PRO:HD2  | 1.88                     | 0.54              |
| 1:A:487:ILE:HD13 | 1:A:490:MET:HE3  | 1.90                     | 0.54              |
| 1:B:316:VAL:HG21 | 1:B:489:LEU:HD21 | 1.90                     | 0.54              |
| 1:B:436:ARG:NH1  | 6:S:19:HOH:O     | 2.37                     | 0.54              |
| 1:D:487:ILE:HD13 | 1:D:490:MET:HE3  | 1.90                     | 0.53              |
| 1:C:396:MET:O    | 1:C:436:ARG:HD3  | 2.10                     | 0.52              |
| 1:D:447:CYS:CB   | 1:D:486:LEU:CD2  | 2.87                     | 0.52              |
| 1:D:346:LEU:HB3  | 2:D:601:LIG:C15  | 2.40                     | 0.52              |
| 1:B:465:THR:CG2  | 1:B:468:SER:HB2  | 2.40                     | 0.51              |
| 1:B:525:LEU:O    | 1:B:525:LEU:HD22 | 2.10                     | 0.51              |
| 1:C:316:VAL:HG21 | 1:C:489:LEU:HD21 | 1.93                     | 0.51              |
| 1:B:311:THR:N    | 1:B:314:GLN:HE21 | 2.02                     | 0.51              |
| 1:A:413:ASN:N    | 1:A:413:ASN:HD22 | 2.08                     | 0.51              |
| 1:A:459:TYR:CD2  | 1:B:513:HIS:HB2  | 2.45                     | 0.51              |
| 1:D:316:VAL:HG21 | 1:D:489:LEU:HD21 | 1.93                     | 0.51              |
| 1:A:323:GLU:OE1  | 1:A:449:LYS:NZ   | 2.30                     | 0.50              |
| 1:D:525:LEU:HD22 | 2:D:601:LIG:C27  | 2.42                     | 0.50              |
| 1:B:525:LEU:C    | 1:B:525:LEU:HD22 | 2.33                     | 0.49              |
| 1:A:534:VAL:HG22 | 1:A:535:PRO:CD   | 2.40                     | 0.49              |
| 1:A:316:VAL:HG21 | 1:A:489:LEU:HD21 | 1.95                     | 0.49              |
| 1:D:307:ALA:HB1  | 1:D:365:PRO:HB3  | 1.95                     | 0.49              |
| 1:B:411:ASP:H    | 1:B:414:GLN:NE2  | 2.11                     | 0.48              |
| 1:A:307:ALA:HB1  | 1:A:365:PRO:HB3  | 1.95                     | 0.48              |
| 1:A:311:THR:HG23 | 1:A:314:GLN:H    | 1.79                     | 0.48              |
| 1:A:468:SER:O    | 1:A:472:LYS:CD   | 2.62                     | 0.48              |
| 1:A:488:HIS:NE2  | 1:A:492:LYS:HD2  | 2.30                     | 0.47              |
| 1:C:513:HIS:HB2  | 1:D:459:TYR:CD2  | 2.49                     | 0.47              |
| 1:B:498:GLN:HA   | 1:B:501:HIS:CE1  | 2.50                     | 0.47              |

*Continued on next page...*

Continued from previous page...

| Atom-1           | Atom-2           | Interatomic distance (Å) | Clash overlap (Å) |
|------------------|------------------|--------------------------|-------------------|
| 1:D:311:THR:HG23 | 1:D:314:GLN:H    | 1.80                     | 0.47              |
| 1:D:355:VAL:HG22 | 1:D:543:MET:HE3  | 1.97                     | 0.47              |
| 1:D:498:GLN:HA   | 1:D:501:HIS:CE1  | 2.50                     | 0.46              |
| 1:A:355:VAL:HG22 | 1:A:543:MET:HE3  | 1.98                     | 0.46              |
| 1:A:401:LYS:CD   | 1:A:411:ASP:HB3  | 2.46                     | 0.45              |
| 1:D:403:LEU:HD12 | 1:D:405:ALA:O    | 2.16                     | 0.45              |
| 1:B:525:LEU:CD2  | 1:B:525:LEU:C    | 2.85                     | 0.45              |
| 1:D:328:TYR:CE1  | 1:D:406:PRO:HB2  | 2.51                     | 0.45              |
| 1:B:411:ASP:H    | 1:B:414:GLN:HE21 | 1.64                     | 0.45              |
| 1:C:370:LEU:HD11 | 1:C:475:ILE:HD11 | 1.99                     | 0.44              |
| 1:D:525:LEU:HD13 | 2:D:601:LIG:C28  | 2.47                     | 0.44              |
| 1:A:341:SER:HB3  | 6:S:13:HOH:O     | 2.16                     | 0.44              |
| 1:B:396:MET:O    | 1:B:436:ARG:NE   | 2.47                     | 0.44              |
| 1:A:413:ASN:H    | 1:A:413:ASN:HD22 | 1.65                     | 0.44              |
| 1:A:525:LEU:HG   | 2:A:601:LIG:C27  | 2.47                     | 0.44              |
| 1:D:532:ASN:HA   | 1:D:532:ASN:HD22 | 1.63                     | 0.44              |
| 1:A:350:ALA:O    | 1:A:354:LEU:HD13 | 2.18                     | 0.43              |
| 1:C:513:HIS:HB2  | 1:D:459:TYR:CE2  | 2.53                     | 0.43              |
| 1:D:370:LEU:O    | 1:D:375:GLN:NE2  | 2.51                     | 0.43              |
| 1:A:370:LEU:O    | 1:A:375:GLN:NE2  | 2.51                     | 0.42              |
| 1:B:465:THR:HG23 | 1:B:468:SER:H    | 1.85                     | 0.42              |
| 1:D:468:SER:HA   | 1:D:471:GLU:HG3  | 2.02                     | 0.42              |
| 1:A:353:GLU:OE2  | 2:A:601:LIG:O20  | 2.38                     | 0.42              |
| 1:A:401:LYS:HE3  | 1:A:411:ASP:HB3  | 2.01                     | 0.41              |
| 1:D:311:THR:HG22 | 1:D:314:GLN:CD   | 2.41                     | 0.41              |
| 1:C:513:HIS:CD2  | 1:D:459:TYR:HB2  | 2.54                     | 0.41              |
| 1:A:370:LEU:HD11 | 1:A:475:ILE:HD11 | 2.02                     | 0.41              |
| 1:D:396:MET:O    | 1:D:436:ARG:NE   | 2.48                     | 0.41              |
| 1:B:504:LEU:C    | 1:B:504:LEU:CD1  | 2.86                     | 0.40              |
| 1:B:370:LEU:O    | 1:B:375:GLN:NE2  | 2.52                     | 0.40              |

There are no symmetry-related clashes.

## 5.3 Torsion angles [i](#)

### 5.3.1 Protein backbone [i](#)

In the following table, the Percentiles column shows the percent Ramachandran outliers of the chain as a percentile score with respect to all X-ray entries followed by that with respect to entries of similar resolution.

The Analysed column shows the number of residues for which the backbone conformation was analysed, and the total number of residues.

| Mol | Chain | Analysed       | Favoured   | Allowed | Outliers | Percentiles |     |
|-----|-------|----------------|------------|---------|----------|-------------|-----|
| 1   | A     | 213/257 (83%)  | 211 (99%)  | 2 (1%)  | 0        | 100         | 100 |
| 1   | B     | 207/257 (80%)  | 204 (99%)  | 3 (1%)  | 0        | 100         | 100 |
| 1   | C     | 188/257 (73%)  | 187 (100%) | 1 (0%)  | 0        | 100         | 100 |
| 1   | D     | 230/257 (90%)  | 224 (97%)  | 3 (1%)  | 3 (1%)   | 12          | 3   |
| All | All   | 838/1028 (82%) | 826 (99%)  | 9 (1%)  | 3 (0%)   | 34          | 20  |

All (3) Ramachandran outliers are listed below:

| Mol | Chain | Res | Type |
|-----|-------|-----|------|
| 1   | D     | 304 | ASN  |
| 1   | D     | 468 | SER  |
| 1   | D     | 532 | ASN  |

### 5.3.2 Protein sidechains [i](#)

In the following table, the Percentiles column shows the percent sidechain outliers of the chain as a percentile score with respect to all X-ray entries followed by that with respect to entries of similar resolution.

The Analysed column shows the number of residues for which the sidechain conformation was analysed, and the total number of residues.

| Mol | Chain | Analysed      | Rotameric | Outliers | Percentiles |    |
|-----|-------|---------------|-----------|----------|-------------|----|
| 1   | A     | 198/232 (85%) | 186 (94%) | 12 (6%)  | 18          | 5  |
| 1   | B     | 188/232 (81%) | 182 (97%) | 6 (3%)   | 39          | 21 |
| 1   | C     | 177/232 (76%) | 172 (97%) | 5 (3%)   | 43          | 26 |
| 1   | D     | 211/232 (91%) | 201 (95%) | 10 (5%)  | 26          | 10 |
| All | All   | 774/928 (83%) | 741 (96%) | 33 (4%)  | 29          | 12 |

All (33) residues with a non-rotameric sidechain are listed below:

| Mol | Chain | Res | Type |
|-----|-------|-----|------|
| 1   | A     | 306 | LEU  |
| 1   | A     | 341 | SER  |
| 1   | A     | 354 | LEU  |
| 1   | A     | 380 | GLU  |
| 1   | A     | 413 | ASN  |

*Continued on next page...*

*Continued from previous page...*

| Mol | Chain | Res | Type |
|-----|-------|-----|------|
| 1   | A     | 421 | MET  |
| 1   | A     | 469 | LEU  |
| 1   | A     | 497 | LEU  |
| 1   | A     | 512 | SER  |
| 1   | A     | 520 | LYS  |
| 1   | A     | 533 | VAL  |
| 1   | A     | 539 | LEU  |
| 1   | B     | 304 | ASN  |
| 1   | B     | 329 | SER  |
| 1   | B     | 411 | ASP  |
| 1   | B     | 464 | SER  |
| 1   | B     | 512 | SER  |
| 1   | B     | 525 | LEU  |
| 1   | C     | 329 | SER  |
| 1   | C     | 412 | ARG  |
| 1   | C     | 469 | LEU  |
| 1   | C     | 512 | SER  |
| 1   | C     | 525 | LEU  |
| 1   | D     | 346 | LEU  |
| 1   | D     | 434 | ARG  |
| 1   | D     | 468 | SER  |
| 1   | D     | 469 | LEU  |
| 1   | D     | 472 | LYS  |
| 1   | D     | 512 | SER  |
| 1   | D     | 515 | ARG  |
| 1   | D     | 532 | ASN  |
| 1   | D     | 533 | VAL  |
| 1   | D     | 537 | TYR  |

Some sidechains can be flipped to improve hydrogen bonding and reduce clashes. All (12) such sidechains are listed below:

| Mol | Chain | Res | Type |
|-----|-------|-----|------|
| 1   | A     | 398 | HIS  |
| 1   | A     | 413 | ASN  |
| 1   | A     | 519 | ASN  |
| 1   | B     | 314 | GLN  |
| 1   | B     | 414 | GLN  |
| 1   | B     | 488 | HIS  |
| 1   | B     | 519 | ASN  |
| 1   | C     | 398 | HIS  |
| 1   | C     | 488 | HIS  |
| 1   | C     | 519 | ASN  |

*Continued on next page...*

*Continued from previous page...*

| Mol | Chain | Res | Type |
|-----|-------|-----|------|
| 1   | D     | 519 | ASN  |
| 1   | D     | 532 | ASN  |

### 5.3.3 RNA [i](#)

There are no RNA molecules in this entry.

### 5.4 Non-standard residues in protein, DNA, RNA chains [i](#)

There are no non-standard protein/DNA/RNA residues in this entry.

### 5.5 Carbohydrates [i](#)

There are no monosaccharides in this entry.

### 5.6 Ligand geometry [i](#)

Of 8 ligands modelled in this entry, 4 could not be matched to an existing wwPDB Chemical Component Dictionary definition at this stage - leaving 4 for Mogul analysis.

There are no bond length outliers.

There are no bond angle outliers.

There are no chirality outliers.

There are no torsion outliers.

There are no ring outliers.

No monomer is involved in short contacts.

The following is a two-dimensional graphical depiction of Mogul quality analysis of bond lengths, bond angles, torsion angles, and ring geometry for all instances of the Ligand of Interest. In addition, ligands with molecular weight > 250 and outliers as shown on the validation Tables will also be included. For torsion angles, if less than 5% of the Mogul distribution of torsion angles is within 10 degrees of the torsion angle in question, then that torsion angle is considered an outlier. Any bond that is central to one or more torsion angles identified as an outlier by Mogul will be highlighted in the graph. For rings, the root-mean-square deviation (RMSD) between the ring in question and similar rings identified by Mogul is calculated over all ring torsion angles. If the average RMSD is greater than 60 degrees and the minimal RMSD between the ring in question and any Mogul-identified rings is also greater than 60 degrees, then that ring is considered an outlier. The outliers are highlighted in purple. The color gray indicates Mogul did not find sufficient equivalents in the CSD to analyse the geometry.

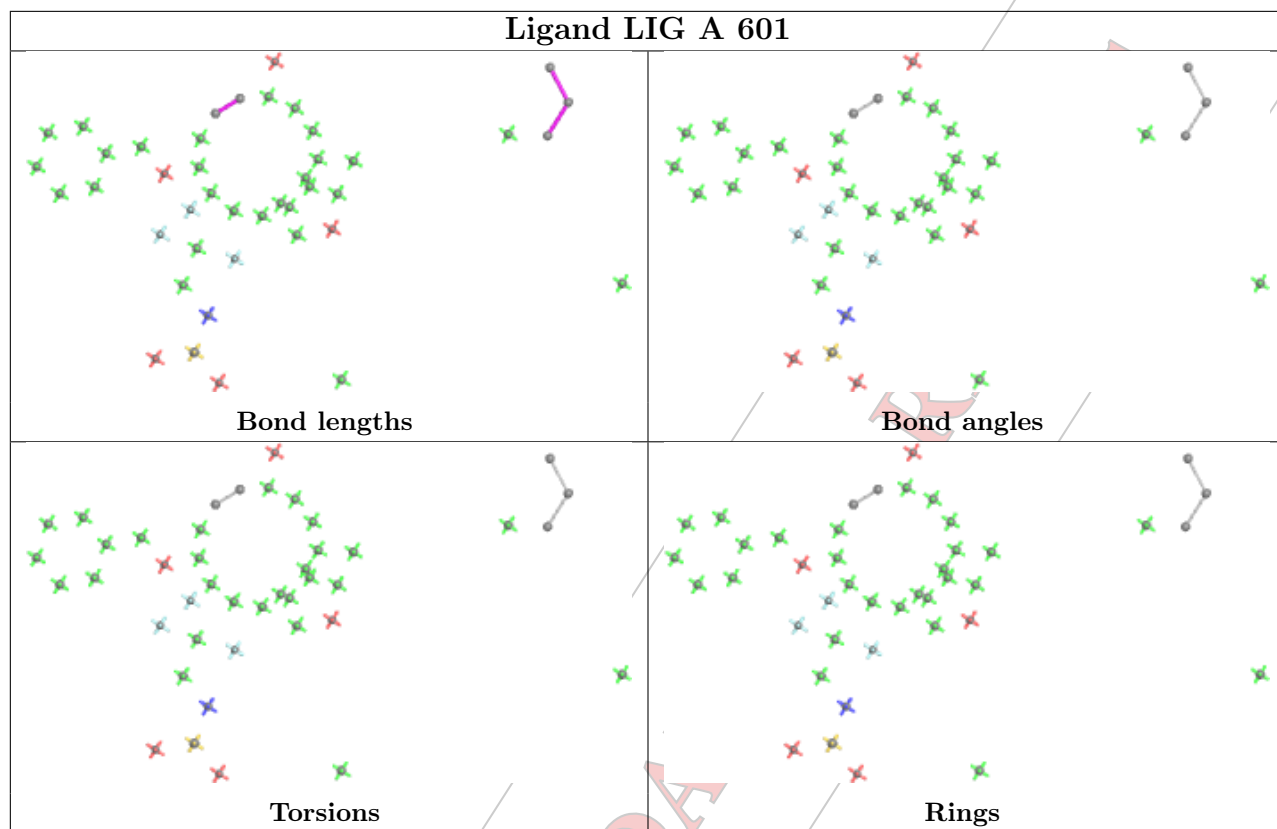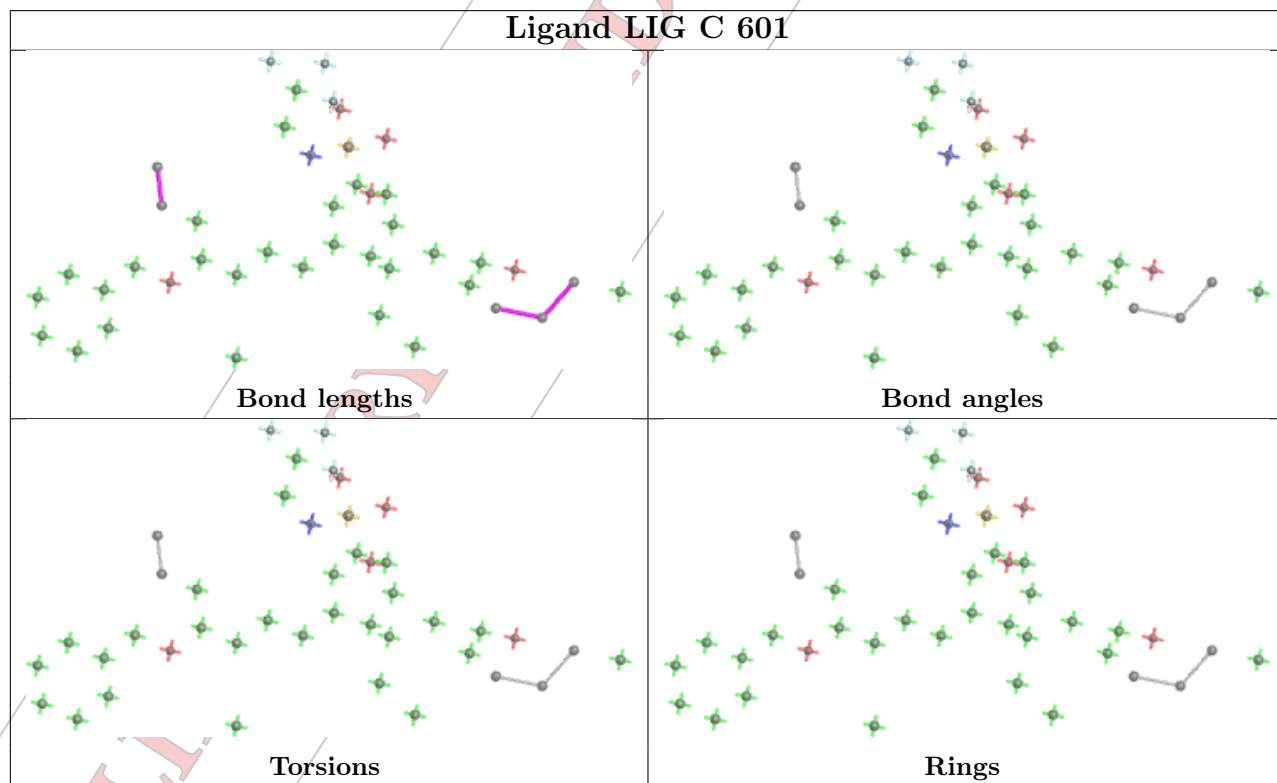

PRELIMINARY

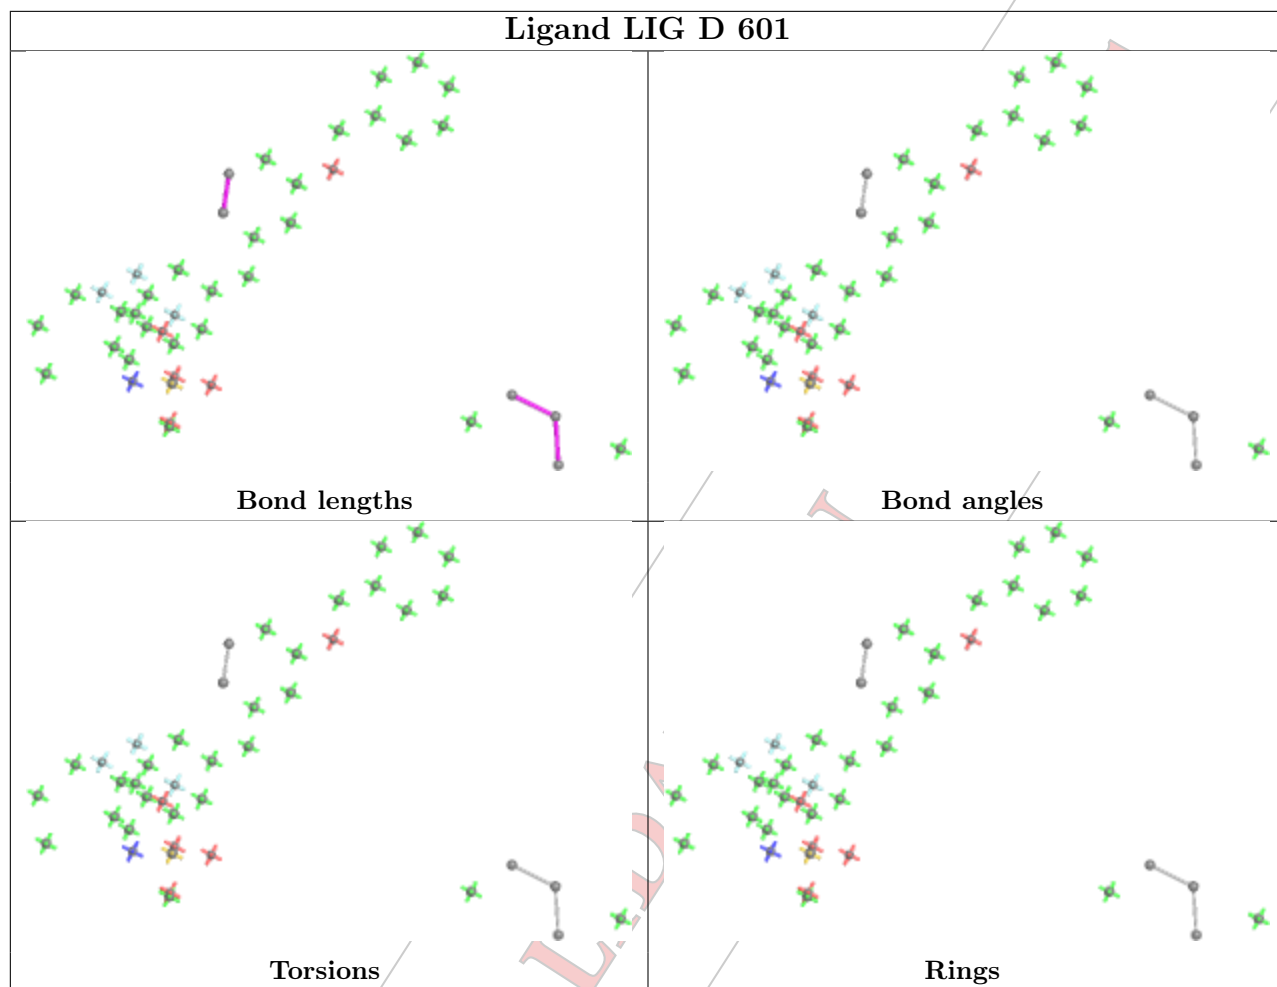

PRELIMINARY VALIDATION



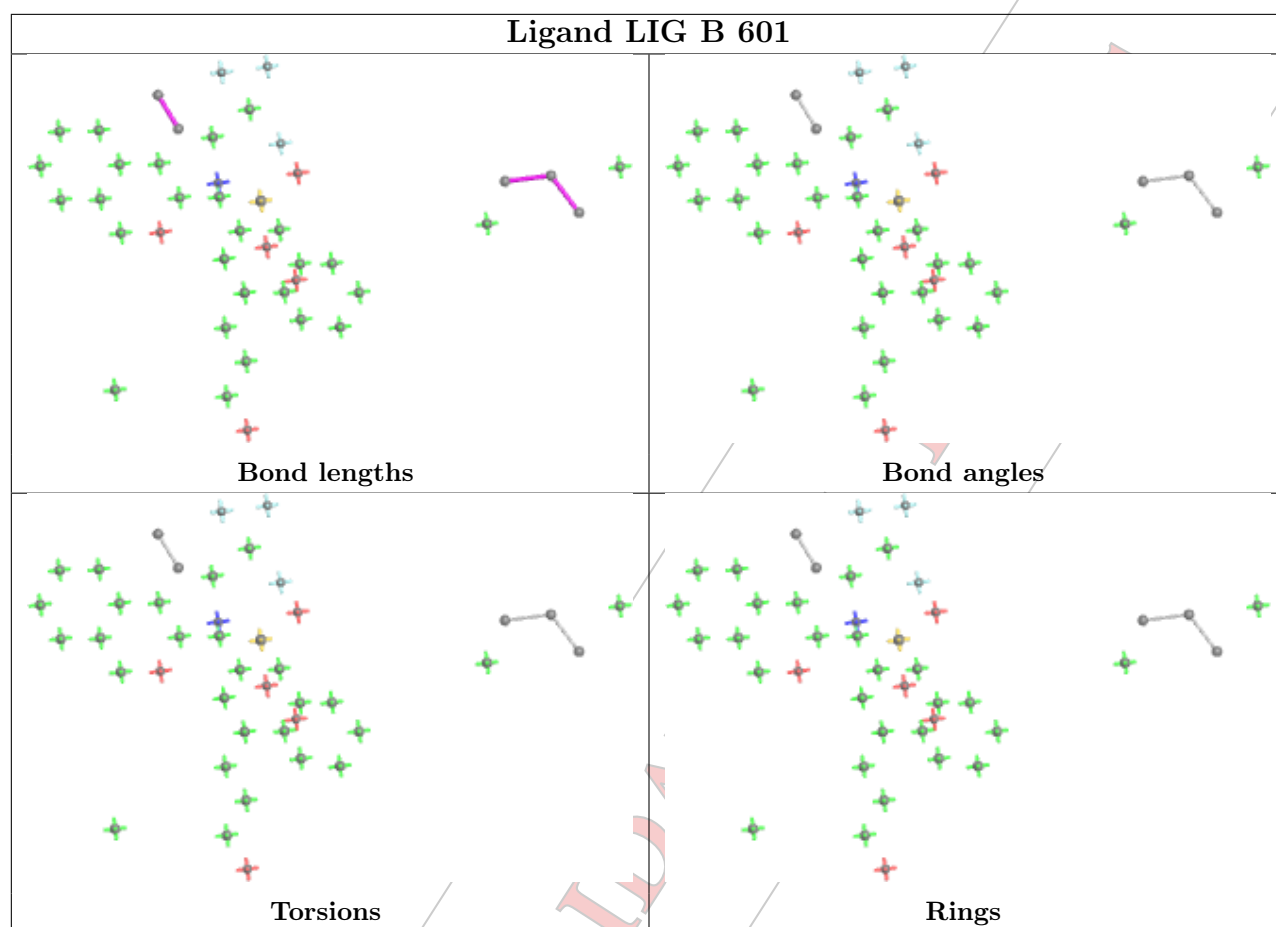

## 5.7 Other polymers [\(i\)](#)

There are no such residues in this entry.

## 5.8 Polymer linkage issues [\(i\)](#)

There are no chain breaks in this entry.

## 6 Fit of model and data i

### 6.1 Protein, DNA and RNA chains i

In the following table, the column labelled '#RSRZ > 2' contains the number (and percentage) of RSRZ outliers, followed by percent RSRZ outliers for the chain as percentile scores relative to all X-ray entries and entries of similar resolution. The OWAB column contains the minimum, median, 95<sup>th</sup> percentile and maximum values of the occupancy-weighted average B-factor per residue. The column labelled 'Q < 0.9' lists the number of (and percentage) of residues with an average occupancy less than 0.9.

| Mol | Chain | Analysed       | <RSRZ> | #RSRZ>2       | OWAB(Å <sup>2</sup> ) | Q<0.9 |
|-----|-------|----------------|--------|---------------|-----------------------|-------|
| 1   | A     | 222/257 (86%)  | 0.68   | 21 (9%) 8 7   | 19, 40, 88, 124       | 0     |
| 1   | B     | 211/257 (82%)  | 0.44   | 12 (5%) 23 21 | 17, 36, 77, 102       | 0     |
| 1   | C     | 197/257 (76%)  | 0.34   | 6 (3%) 50 47  | 17, 36, 74, 90        | 0     |
| 1   | D     | 236/257 (91%)  | 0.77   | 24 (10%) 6 5  | 18, 41, 94, 135       | 0     |
| All | All   | 866/1028 (84%) | 0.57   | 63 (7%) 15 13 | 17, 38, 83, 135       | 0     |

All (63) RSRZ outliers are listed below:

| Mol | Chain | Res | Type | RSRZ |
|-----|-------|-----|------|------|
| 1   | D     | 459 | TYR  | 13.2 |
| 1   | A     | 459 | TYR  | 12.3 |
| 1   | D     | 305 | SER  | 8.5  |
| 1   | D     | 469 | LEU  | 7.5  |
| 1   | D     | 304 | ASN  | 6.8  |
| 1   | D     | 472 | LYS  | 6.7  |
| 1   | A     | 467 | LYS  | 5.9  |
| 1   | D     | 307 | ALA  | 5.7  |
| 1   | B     | 304 | ASN  | 5.6  |
| 1   | D     | 470 | GLU  | 5.5  |
| 1   | A     | 472 | LYS  | 5.3  |
| 1   | D     | 526 | TYR  | 4.9  |
| 1   | A     | 310 | LEU  | 4.8  |
| 1   | A     | 491 | ALA  | 4.4  |
| 1   | D     | 468 | SER  | 4.4  |
| 1   | A     | 308 | LEU  | 4.3  |
| 1   | B     | 305 | SER  | 4.0  |
| 1   | B     | 462 | LEU  | 4.0  |
| 1   | B     | 463 | SER  | 3.9  |
| 1   | A     | 458 | VAL  | 3.9  |
| 1   | D     | 458 | VAL  | 3.8  |

*Continued on next page...*

*Continued from previous page...*

| Mol | Chain | Res | Type | RSRZ |
|-----|-------|-----|------|------|
| 1   | D     | 467 | LYS  | 3.8  |
| 1   | C     | 373 | HIS  | 3.8  |
| 1   | D     | 473 | ASP  | 3.7  |
| 1   | D     | 497 | LEU  | 3.7  |
| 1   | A     | 306 | LEU  | 3.5  |
| 1   | D     | 310 | LEU  | 3.5  |
| 1   | C     | 461 | PHE  | 3.5  |
| 1   | A     | 305 | SER  | 3.5  |
| 1   | D     | 534 | VAL  | 3.4  |
| 1   | B     | 461 | PHE  | 3.4  |
| 1   | B     | 303 | LYS  | 3.4  |
| 1   | C     | 306 | LEU  | 3.4  |
| 1   | A     | 307 | ALA  | 3.3  |
| 1   | B     | 418 | VAL  | 3.3  |
| 1   | A     | 461 | PHE  | 3.2  |
| 1   | A     | 497 | LEU  | 3.2  |
| 1   | D     | 545 | ASP  | 3.2  |
| 1   | A     | 526 | TYR  | 3.1  |
| 1   | D     | 303 | LYS  | 3.1  |
| 1   | D     | 417 | CYS  | 2.8  |
| 1   | C     | 468 | SER  | 2.7  |
| 1   | A     | 473 | ASP  | 2.6  |
| 1   | A     | 545 | ASP  | 2.6  |
| 1   | D     | 358 | ILE  | 2.6  |
| 1   | C     | 341 | SER  | 2.6  |
| 1   | A     | 469 | LEU  | 2.5  |
| 1   | C     | 374 | ASP  | 2.5  |
| 1   | D     | 309 | SER  | 2.4  |
| 1   | A     | 494 | GLY  | 2.4  |
| 1   | B     | 306 | LEU  | 2.3  |
| 1   | D     | 471 | GLU  | 2.3  |
| 1   | A     | 537 | TYR  | 2.3  |
| 1   | A     | 541 | LEU  | 2.3  |
| 1   | A     | 468 | SER  | 2.2  |
| 1   | D     | 541 | LEU  | 2.2  |
| 1   | B     | 476 | HIS  | 2.2  |
| 1   | B     | 409 | LEU  | 2.2  |
| 1   | D     | 461 | PHE  | 2.2  |
| 1   | D     | 495 | LEU  | 2.1  |
| 1   | B     | 439 | ASN  | 2.1  |
| 1   | A     | 540 | LEU  | 2.0  |
| 1   | B     | 464 | SER  | 2.0  |

## 6.2 Non-standard residues in protein, DNA, RNA chains [i](#)

There are no non-standard protein/DNA/RNA residues in this entry.

## 6.3 Carbohydrates [i](#)

There are no monosaccharides in this entry.

## 6.4 Ligands [i](#)

In the following table, the Atoms column lists the number of modelled atoms in the group and the number defined in the chemical component dictionary. The B-factors column lists the minimum, median, 95<sup>th</sup> percentile and maximum values of B factors of atoms in the group. The column labelled 'Q< 0.9' lists the number of atoms with occupancy less than 0.9.

| Mol | Type | Chain | Res | Atoms | RSCC | RSR  | B-factors(Å <sup>2</sup> ) | Q<0.9 |
|-----|------|-------|-----|-------|------|------|----------------------------|-------|
| 3   | TYR  | B     | 526 | 5/?   | 0.74 | 0.19 | 30,30,30,30                | 0     |
| 3   | TYR  | C     | 526 | 5/?   | 0.78 | 0.22 | 30,30,30,30                | 0     |
| 4   | SER  | B     | 527 | 5/?   | 0.87 | 0.21 | 30,30,30,30                | 0     |
| 5   | CYS  | B     | 528 | 5/?   | 0.88 | 0.15 | 30,30,30,30                | 0     |
| 2   | LIG  | B     | 601 | 45/?  | 0.92 | 0.12 | 24,33,62,67                | 0     |
| 2   | LIG  | D     | 601 | 45/?  | 0.94 | 0.10 | 20,26,46,50                | 0     |
| 2   | LIG  | C     | 601 | 45/?  | 0.94 | 0.12 | 16,32,77,83                | 0     |
| 2   | LIG  | A     | 601 | 45/?  | 0.95 | 0.11 | 19,30,51,59                | 0     |

The following is a graphical depiction of the model fit to experimental electron density of all instances of the Ligand of Interest. In addition, ligands with molecular weight > 250 and outliers as shown on the geometry validation Tables will also be included. Each fit is shown from different orientation to approximate a three-dimensional view.

**Electron density around LIG B 601:**

$2mF_o-DF_c$  (at 0.7 rmsd) in gray  
 $mF_o-DF_c$  (at 3 rmsd) in purple (negative)  
and green (positive)

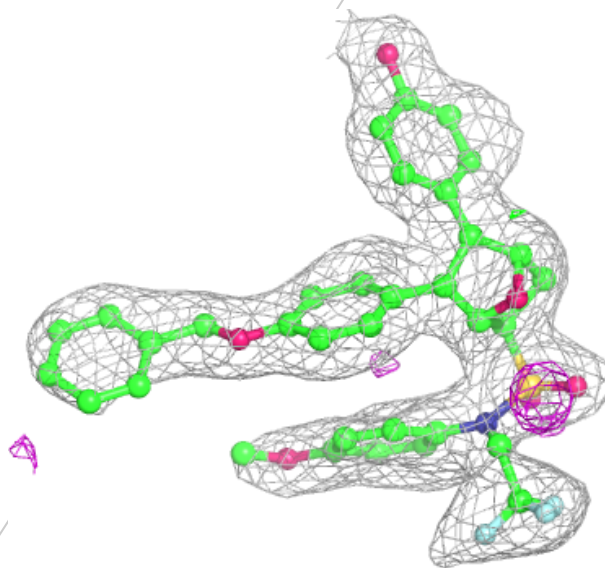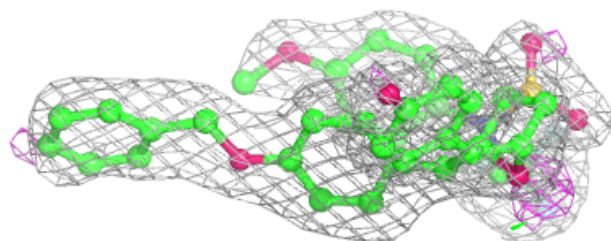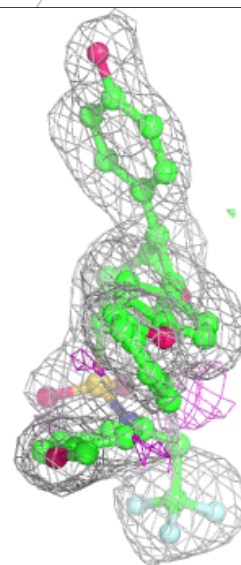

PRELIMINARY

**Electron density around LIG D 601:**

$2mF_o-DF_c$  (at 0.7 rmsd) in gray  
 $mF_o-DF_c$  (at 3 rmsd) in purple (negative)  
and green (positive)

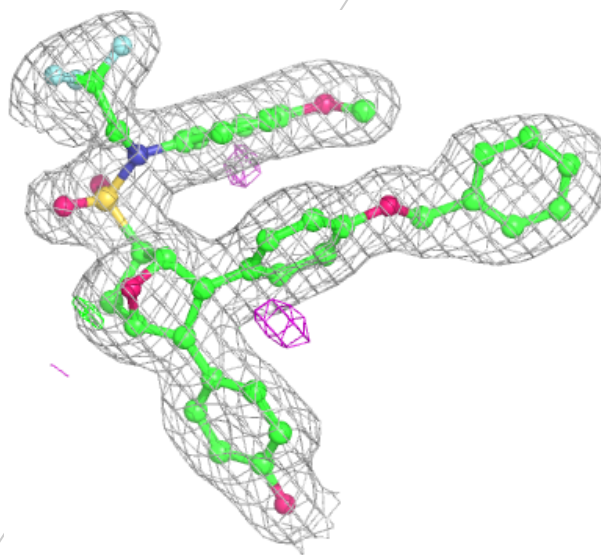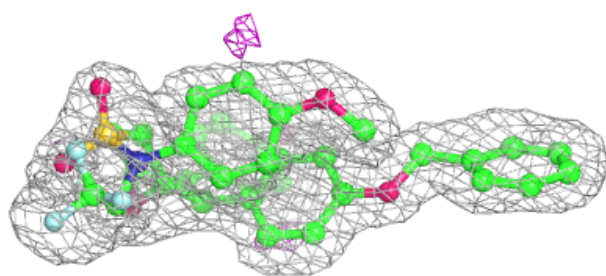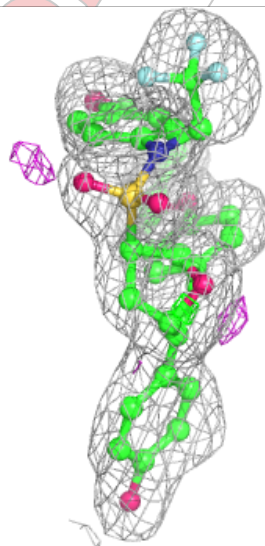

PRELIMINARY

**Electron density around LIG C 601:**

$2mF_o-DF_c$  (at 0.7 rmsd) in gray  
 $mF_o-DF_c$  (at 3 rmsd) in purple (negative)  
and green (positive)

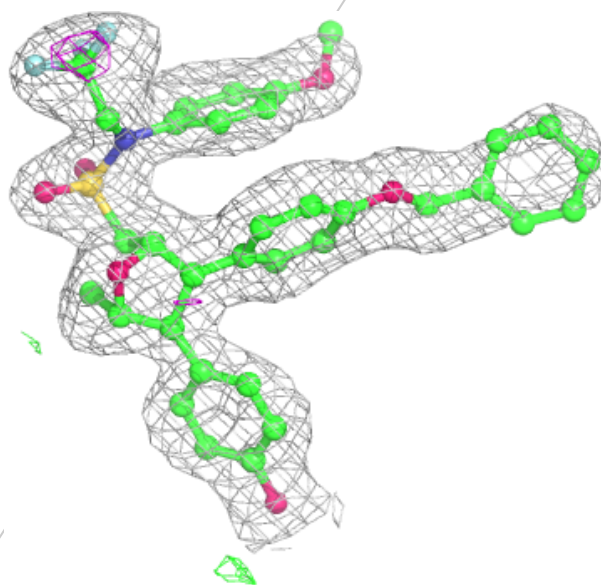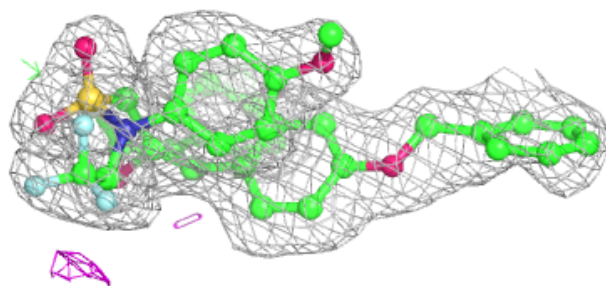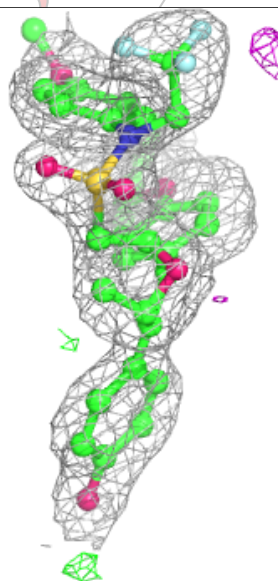

PRELIMINARY

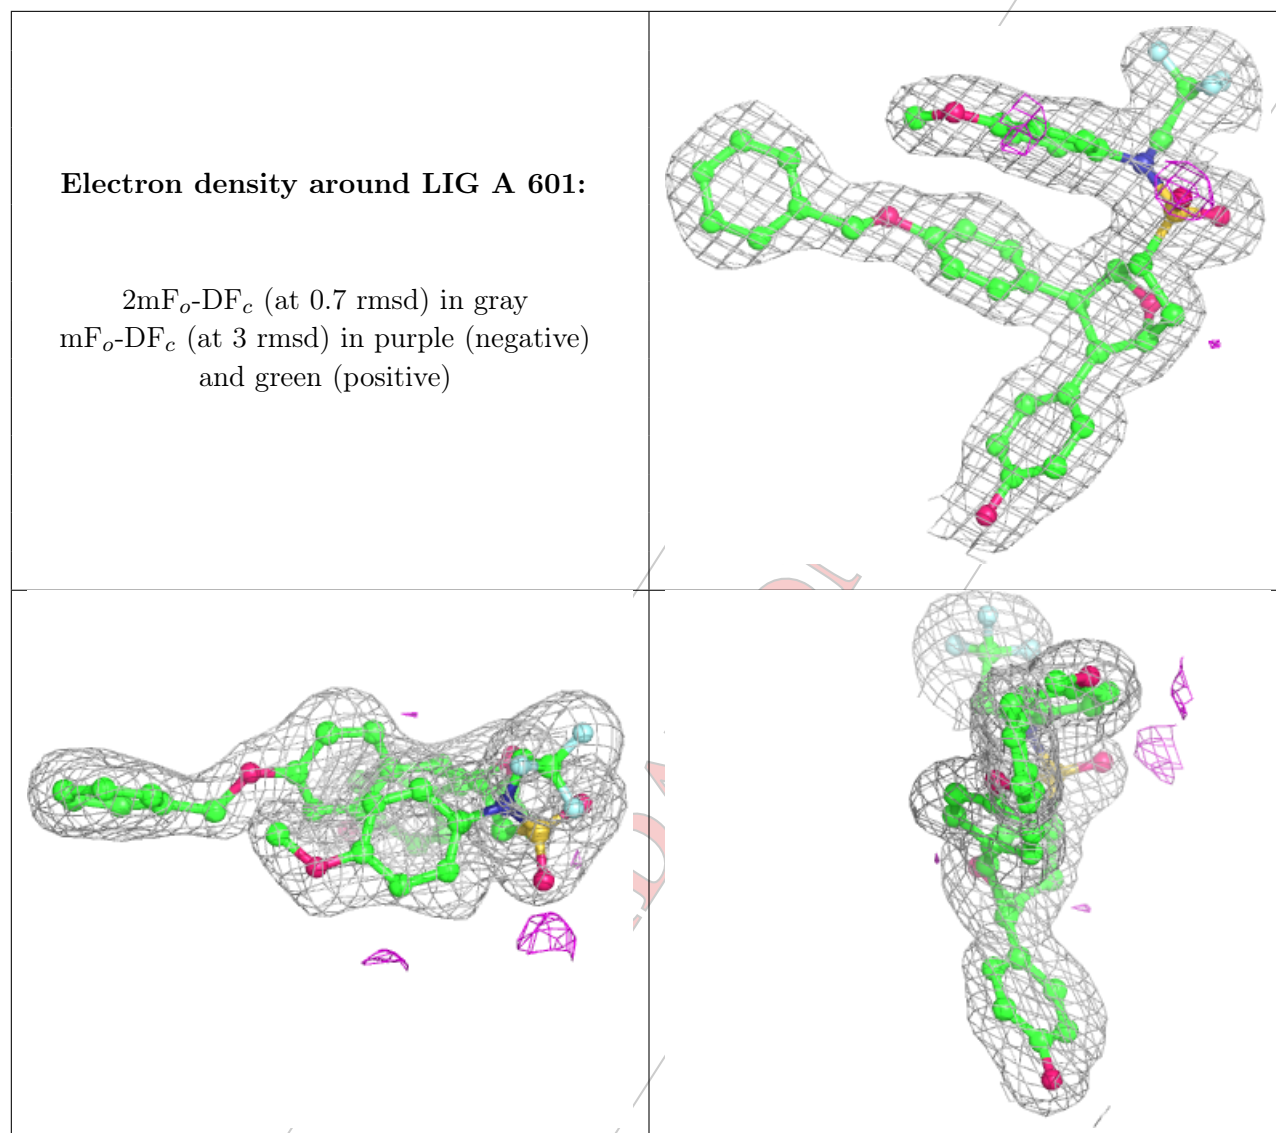

## 6.5 Other polymers [i](#)

There are no such residues in this entry.

PRELIMINARY





# Preliminary Full wwPDB X-ray Structure Validation Report ⓘ

Aug 9, 2020 – 11:03 PM EDT

Deposition ID : D\_1000251222

This is a Preliminary Full wwPDB X-ray Structure Validation Report.

This report is produced by the wwPDB Deposition System during initial deposition but before annotation of the structure.

We welcome your comments at [validation@mail.wwpdb.org](mailto:validation@mail.wwpdb.org)

A user guide is available at

<https://www.wwpdb.org/validation/2017/XrayValidationReportHelp>

with specific help available everywhere you see the ⓘ symbol.

---

The following versions of software and data (see [references ⓘ](#)) were used in the production of this report:

|                                |   |                                                                    |
|--------------------------------|---|--------------------------------------------------------------------|
| MolProbity                     | : | 4.02b-467                                                          |
| Mogul                          | : | 1.8.5 (274361), CSD as541be (2020)                                 |
| Xtriage (Phenix)               | : | 1.13                                                               |
| EDS                            | : | 2.13.1                                                             |
| buster-report                  | : | 1.1.7 (2018)                                                       |
| Percentile statistics          | : | 20191225.v01 (using entries in the PDB archive December 25th 2019) |
| Refmac                         | : | 5.8.0158                                                           |
| CCP4                           | : | 7.0.044 (Gargrove)                                                 |
| Ideal geometry (proteins)      | : | Engh & Huber (2001)                                                |
| Ideal geometry (DNA, RNA)      | : | Parkinson et al. (1996)                                            |
| Validation Pipeline (wwPDB-VP) | : | 2.13.1                                                             |

# 1 Overall quality at a glance i

The following experimental techniques were used to determine the structure:  
*X-RAY DIFFRACTION*

The reported resolution of this entry is 1.78 Å.

Percentile scores (ranging between 0-100) for global validation metrics of the entry are shown in the following graphic. The table shows the number of entries on which the scores are based.

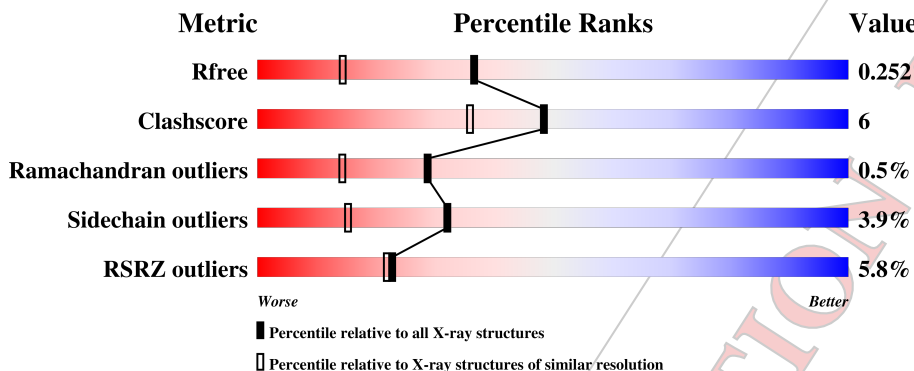

| Metric                | Whole archive<br>(#Entries) | Similar resolution<br>(#Entries, resolution range(Å)) |
|-----------------------|-----------------------------|-------------------------------------------------------|
| $R_{free}$            | 130704                      | 9185 (1.80-1.76)                                      |
| Clashscore            | 141614                      | 10184 (1.80-1.76)                                     |
| Ramachandran outliers | 138981                      | 10051 (1.80-1.76)                                     |
| Sidechain outliers    | 138945                      | 10050 (1.80-1.76)                                     |
| RSRZ outliers         | 127900                      | 9032 (1.80-1.76)                                      |

The table below summarises the geometric issues observed across the polymeric chains and their fit to the electron density. The red, orange, yellow and green segments on the lower bar indicate the fraction of residues that contain outliers for  $\geq 3$ , 2, 1 and 0 types of geometric quality criteria respectively. A grey segment represents the fraction of residues that are not modelled. The numeric value for each fraction is indicated below the corresponding segment, with a dot representing fractions  $\leq 5\%$ . The upper red bar (where present) indicates the fraction of residues that have poor fit to the electron density. The numeric value is given above the bar.

| Mol | Chain | Length | Quality of chain    |
|-----|-------|--------|---------------------|
| 1   | A     | 257    | <br>4% 84% 10% • 5% |
| 1   | B     | 257    | <br>7% 81% 13% • •  |
| 1   | C     | 257    | <br>4% 83% 10% • 5% |
| 1   | D     | 257    | <br>7% 79% 15% 5%   |

## 2 Entry composition i

There are 4 unique types of molecules in this entry. The entry contains 8147 atoms, of which 0 are hydrogens and 0 are deuteriums.

In the tables below, the ZeroOcc column contains the number of atoms modelled with zero occupancy, the AltConf column contains the number of residues with at least one atom in alternate conformation and the Trace column contains the number of residues modelled with at most 2 atoms.

- Molecule 1 is a protein called Estrogen Receptor.

| Mol | Chain | Residues | Atoms |      |     |     |    | ZeroOcc | AltConf | Trace |
|-----|-------|----------|-------|------|-----|-----|----|---------|---------|-------|
|     |       |          | Total | C    | N   | O   | S  |         |         |       |
| 1   | A     | 244      | Total | C    | N   | O   | S  | 0       | 1       | 0     |
|     |       |          | 1956  | 1249 | 333 | 356 | 18 |         |         |       |
| 1   | B     | 246      | Total | C    | N   | O   | S  | 0       | 0       | 0     |
|     |       |          | 1965  | 1254 | 337 | 355 | 19 |         |         |       |
| 1   | C     | 244      | Total | C    | N   | O   | S  | 0       | 0       | 0     |
|     |       |          | 1944  | 1242 | 330 | 353 | 19 |         |         |       |
| 1   | D     | 243      | Total | C    | N   | O   | S  | 0       | 0       | 0     |
|     |       |          | 1947  | 1245 | 336 | 347 | 19 |         |         |       |

- Molecule 2 is CHLORIDE ION (three-letter code: CL) (formula: Cl).

| Mol | Chain | Residues | Atoms | ZeroOcc | AltConf |   |
|-----|-------|----------|-------|---------|---------|---|
| 2   | F     | 1        | Total | Cl      | 0       | 0 |
|     |       |          | 1     | 1       |         |   |
| 2   | F     | 1        | Total | Cl      | 0       | 0 |
|     |       |          | 1     | 1       |         |   |

- Molecule 3 is a ligand with the chemical component id LIG but its atom names do not match the existing wwPDB Chemical Component Dictionary definition for LIG. Consequently no firm identification of ligand chemistry can be made. Once the structure is annotated then an identification and diagram will be given here.

| Mol | Chain | Residues | Atoms |    |    |   |   | ZeroOcc | AltConf |   |
|-----|-------|----------|-------|----|----|---|---|---------|---------|---|
|     |       |          | Total | C  | Cl | F | N |         |         | O |
| 3   | E     | 1        | Total | C  | Cl | F | N | O       | 0       | 0 |
|     |       |          | 32    | 26 | 1  | 1 | 2 | 2       |         |   |
| 3   | E     | 1        | Total | C  | Cl | F | N | O       | 0       | 0 |
|     |       |          | 32    | 26 | 1  | 1 | 2 | 2       |         |   |
| 3   | E     | 1        | Total | C  | Cl | F | N | O       | 0       | 0 |
|     |       |          | 32    | 26 | 1  | 1 | 2 | 2       |         |   |
| 3   | E     | 1        | Total | C  | Cl | F | N | O       | 0       | 0 |
|     |       |          | 32    | 26 | 1  | 1 | 2 | 2       |         |   |

- Molecule 4 is water.

| Mol | Chain | Residues | Atoms        |          | ZeroOcc | AltConf |
|-----|-------|----------|--------------|----------|---------|---------|
| 4   | S     | 205      | Total<br>205 | O<br>205 | 0       | 0       |

**PRELIMINARY VALIDATION REPORT**

### 3 Residue-property plots

These plots are drawn for all protein, RNA, DNA and oligosaccharide chains in the entry. The first graphic for a chain summarises the proportions of the various outlier classes displayed in the second graphic. The second graphic shows the sequence view annotated by issues in geometry and electron density. Residues are color-coded according to the number of geometric quality criteria for which they contain at least one outlier: green = 0, yellow = 1, orange = 2 and red = 3 or more. A red dot above a residue indicates a poor fit to the electron density ( $RSRZ > 2$ ). Stretches of 2 or more consecutive residues without any outlier are shown as a green connector. Residues present in the sample, but not in the model, are shown in grey.

- Molecule 1: Estrogen Receptor

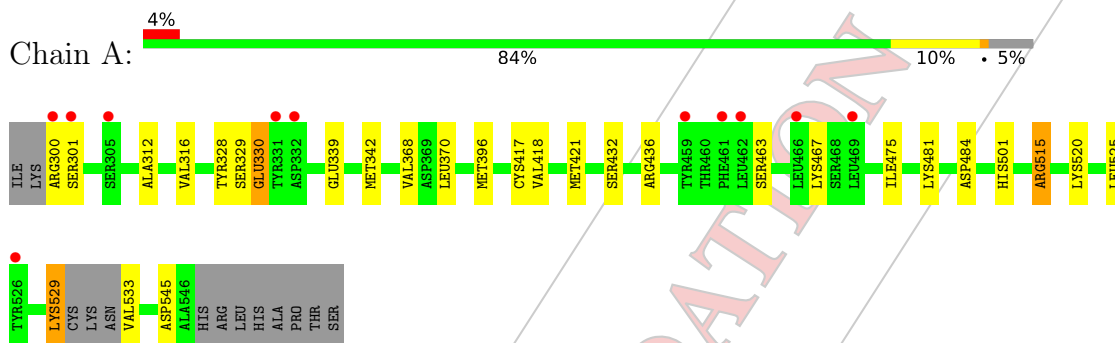

- Molecule 1: Estrogen Receptor

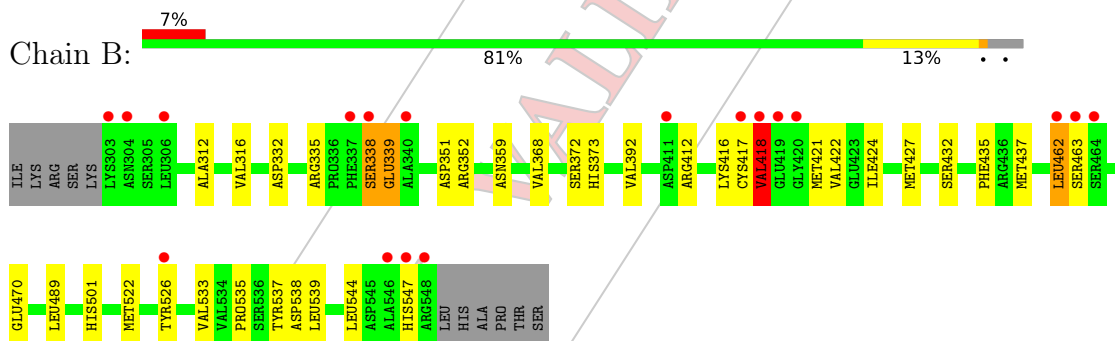

- Molecule 1: Estrogen Receptor

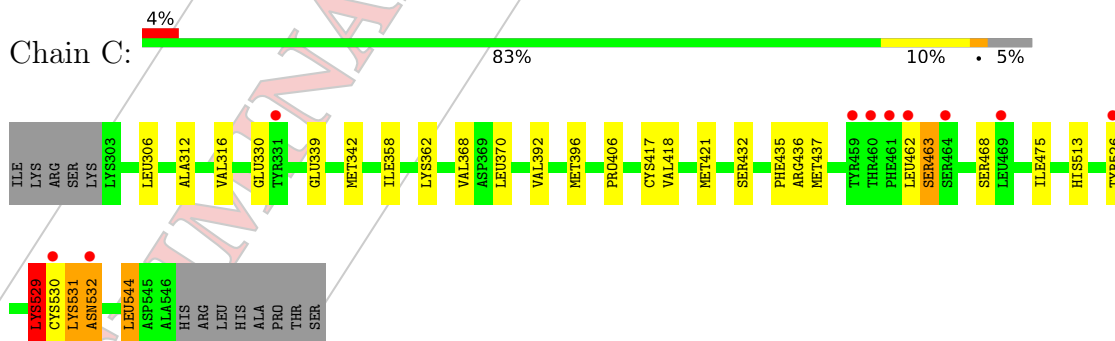

- Molecule 1: Estrogen Receptor

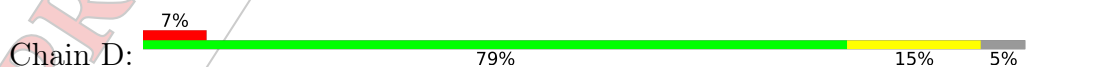

|        |  |
|--------|--|
| ILE    |  |
| LYS    |  |
| ARG    |  |
| SER    |  |
| LYS    |  |
| LYS303 |  |
| ASN304 |  |
| SER305 |  |
| LEU306 |  |
| ALA312 |  |
| VAL316 |  |
| TYR331 |  |
| THR334 |  |
| PHE337 |  |
| ALA340 |  |
| MET343 |  |
| ASN348 |  |
| ARG352 |  |
| HIS373 |  |
| VAL392 |  |
| MET396 |  |
| ASN407 |  |
| ARG412 |  |
| VAL418 |  |
| GLU    |  |
| GLY    |  |
| MET421 |  |
| VAL423 |  |
| ILE424 |  |
| PHE425 |  |
| ASP426 |  |
| MET427 |  |
| SER432 |  |
| PHE435 |  |
| ARG436 |  |
| MET437 |  |
| TYR459 |  |
| THR460 |  |
| PHE461 |  |
| LEU    |  |
| SER    |  |
| SER    |  |
| THR    |  |
| LEU    |  |
| LYS467 |  |
| SER468 |  |
| LEU469 |  |
| GLU470 |  |
| ASP473 |  |
| ARG477 |  |
| LEU489 |  |
| LYS492 |  |
| ALA493 |  |
| GLN498 |  |
| HIS501 |  |
| MET528 |  |
| LYS529 |  |
| CYS530 |  |
| PRO535 |  |
| SER536 |  |
| TYR537 |  |
| ASP538 |  |
| LEU539 |  |
| LEU544 |  |
| LEU549 |  |
| PRO552 |  |
| THR    |  |
| SER    |  |

PRELIMINARY VALIDATION REPORT

## 4 Data and refinement statistics i

| Property                                                                | Value                                                       | Source           |
|-------------------------------------------------------------------------|-------------------------------------------------------------|------------------|
| Space group                                                             | P 1                                                         | Depositor        |
| Cell constants<br>a, b, c, $\alpha$ , $\beta$ , $\gamma$                | 53.09Å 58.82Å 93.71Å<br>86.88° 75.21° 63.40°                | Depositor        |
| Resolution (Å)                                                          | 90.39 – 1.78<br>90.39 – 1.78                                | Depositor<br>EDS |
| % Data completeness<br>(in resolution range)                            | 53.0 (90.39-1.78)<br>53.0 (90.39-1.78)                      | Depositor<br>EDS |
| $R_{merge}$                                                             | (Not available)                                             | Depositor        |
| $R_{sym}$                                                               | (Not available)                                             | Depositor        |
| $\langle I/\sigma(I) \rangle$ <sup>1</sup>                              | 1.66 (at 1.77Å)                                             | Xtrriage         |
| Refinement program                                                      | REFMAC 5.8.0258                                             | Depositor        |
| R, $R_{free}$                                                           | 0.196 , 0.251<br>0.205 , 0.252                              | Depositor<br>DCC |
| $R_{free}$ test set                                                     | 2474 reflections (4.97%)                                    | wwPDB-VP         |
| Wilson B-factor (Å <sup>2</sup> )                                       | 26.0                                                        | Xtrriage         |
| Anisotropy                                                              | 0.051                                                       | Xtrriage         |
| Bulk solvent $k_{sol}$ (e/Å <sup>3</sup> ), $B_{sol}$ (Å <sup>2</sup> ) | 0.36 , 41.0                                                 | EDS              |
| L-test for twinning <sup>2</sup>                                        | $\langle  L  \rangle = 0.50$ , $\langle L^2 \rangle = 0.34$ | Xtrriage         |
| Estimated twinning fraction                                             | 0.125 for h,h-k,h-l                                         | Xtrriage         |
| $F_o, F_c$ correlation                                                  | 0.94                                                        | EDS              |
| Total number of atoms                                                   | 8147                                                        | wwPDB-VP         |
| Average B, all atoms (Å <sup>2</sup> )                                  | 36.0                                                        | wwPDB-VP         |

Xtrriage's analysis on translational NCS is as follows: *The largest off-origin peak in the Patterson function is 7.01% of the height of the origin peak. No significant pseudotranslation is detected.*

<sup>1</sup>Intensities estimated from amplitudes.

<sup>2</sup>Theoretical values of  $\langle |L| \rangle$ ,  $\langle L^2 \rangle$  for acentric reflections are 0.5, 0.333 respectively for untwinned datasets, and 0.375, 0.2 for perfectly twinned datasets.

## 5 Model quality i

### 5.1 Standard geometry i

Bond lengths and bond angles in the following residue types are not validated in this section: LIG, YCM, CL

The Z score for a bond length (or angle) is the number of standard deviations the observed value is removed from the expected value. A bond length (or angle) with  $|Z| > 5$  is considered an outlier worth inspection. RMSZ is the root-mean-square of all Z scores of the bond lengths (or angles).

| Mol | Chain | Bond lengths |         | Bond angles |                |
|-----|-------|--------------|---------|-------------|----------------|
|     |       | RMSZ         | # Z  >5 | RMSZ        | # Z  >5        |
| 1   | A     | 0.50         | 0/1980  | 0.69        | 1/2671 (0.0%)  |
| 1   | B     | 0.49         | 0/1991  | 0.71        | 0/2688         |
| 1   | C     | 0.49         | 0/1969  | 0.71        | 0/2659         |
| 1   | D     | 0.49         | 0/1973  | 0.68        | 0/2662         |
| All | All   | 0.49         | 0/7913  | 0.70        | 1/10680 (0.0%) |

Chiral center outliers are detected by calculating the chiral volume of a chiral center and verifying if the center is modelled as a planar moiety or with the opposite hand. A planarity outlier is detected by checking planarity of atoms in a peptide group, atoms in a mainchain group or atoms of a sidechain that are expected to be planar.

| Mol | Chain | #Chirality outliers | #Planarity outliers |
|-----|-------|---------------------|---------------------|
| 1   | B     | 0                   | 1                   |
| 1   | C     | 0                   | 2                   |
| All | All   | 0                   | 3                   |

There are no bond length outliers.

All (1) bond angle outliers are listed below:

| Mol | Chain | Res | Type | Atoms     | Z    | Observed(°) | Ideal(°) |
|-----|-------|-----|------|-----------|------|-------------|----------|
| 1   | A     | 515 | ARG  | NE-CZ-NH1 | 5.56 | 123.08      | 120.30   |

There are no chirality outliers.

All (3) planarity outliers are listed below:

| Mol | Chain | Res | Type | Group   |
|-----|-------|-----|------|---------|
| 1   | B     | 338 | SER  | Peptide |
| 1   | C     | 529 | LYS  | Peptide |
| 1   | C     | 530 | CYS  | Peptide |



## 5.2 Too-close contacts [i](#)

In the following table, the Non-H and H(model) columns list the number of non-hydrogen atoms and hydrogen atoms in the chain respectively. The H(added) column lists the number of hydrogen atoms added and optimized by MolProbity. The Clashes column lists the number of clashes within the asymmetric unit, whereas Symm-Clashes lists symmetry related clashes.

| Mol | Chain | Non-H | H(model) | H(added) | Clashes | Symm-Clashes |
|-----|-------|-------|----------|----------|---------|--------------|
| 1   | A     | 1956  | 0        | 2002     | 18      | 2            |
| 1   | B     | 1965  | 0        | 2011     | 29      | 2            |
| 1   | C     | 1944  | 0        | 1991     | 28      | 0            |
| 1   | D     | 1947  | 0        | 1991     | 27      | 0            |
| 2   | F     | 2     | 0        | 0        | 1       | 0            |
| 3   | E     | 128   | 0        | 4        | 2       | 0            |
| 4   | S     | 205   | 0        | 0        | 14      | 0            |
| All | All   | 8147  | 0        | 7999     | 95      | 2            |

The all-atom clashscore is defined as the number of clashes found per 1000 atoms (including hydrogen atoms). The all-atom clashscore for this structure is 6.

All (95) close contacts within the same asymmetric unit are listed below, sorted by their clash magnitude.

| Atom-1           | Atom-2           | Interatomic distance (Å) | Clash overlap (Å) |
|------------------|------------------|--------------------------|-------------------|
| 1:A:501:HIS:HE1  | 4:S:11:HOH:O     | 1.50                     | 0.94              |
| 1:D:343:MET:HG2  | 1:D:418:VAL:HG21 | 1.59                     | 0.83              |
| 1:C:370:LEU:HD11 | 1:C:475:ILE:HD11 | 1.63                     | 0.81              |
| 1:D:459:TYR:OH   | 4:S:120:HOH:O    | 1.99                     | 0.80              |
| 1:A:370:LEU:HD11 | 1:A:475:ILE:HD11 | 1.65                     | 0.78              |
| 1:A:525:LEU:HD13 | 1:A:533:VAL:HG11 | 1.65                     | 0.78              |
| 1:B:417:CYS:O    | 1:B:418:VAL:HG13 | 1.85                     | 0.77              |
| 1:C:342:MET:HE2  | 1:C:417:CYS:HB3  | 1.68                     | 0.76              |
| 1:C:463:SER:OG   | 4:S:191:HOH:O    | 1.72                     | 0.76              |
| 1:B:437:MET:HG3  | 4:S:207:HOH:O    | 1.85                     | 0.75              |
| 1:C:463:SER:HB3  | 1:C:468:SER:HB2  | 1.70                     | 0.73              |
| 1:B:338:SER:O    | 1:B:339:GLU:HG3  | 1.89                     | 0.73              |
| 1:A:545:ASP:OD2  | 4:S:66:HOH:O     | 2.08                     | 0.70              |
| 1:C:513:HIS:CD2  | 1:D:459:TYR:HD2  | 2.11                     | 0.68              |
| 1:C:406:PRO:O    | 4:S:111:HOH:O    | 2.13                     | 0.65              |
| 1:B:533:VAL:HG22 | 3:E:2:LIG:C21    | 2.28                     | 0.64              |
| 1:A:501:HIS:CE1  | 4:S:11:HOH:O     | 2.35                     | 0.64              |
| 1:C:532:ASN:CG   | 1:C:532:ASN:O    | 2.37                     | 0.62              |
| 1:A:368:VAL:HG22 | 4:S:73:HOH:O     | 2.00                     | 0.61              |
| 1:B:359:ASN:OD1  | 1:B:547:HIS:CE1  | 2.54                     | 0.61              |

*Continued on next page...*

*Continued from previous page...*

| Atom-1           | Atom-2           | Interatomic distance (Å) | Clash overlap (Å) |
|------------------|------------------|--------------------------|-------------------|
| 1:A:396:MET:O    | 1:A:436:ARG:HD3  | 2.01                     | 0.60              |
| 1:C:396:MET:O    | 1:C:436:ARG:HD3  | 2.02                     | 0.60              |
| 1:A:484:ASP:OD1  | 1:B:501:HIS:HE1  | 1.84                     | 0.60              |
| 1:D:396:MET:O    | 1:D:436:ARG:HD3  | 2.02                     | 0.60              |
| 1:D:489:LEU:O    | 1:D:492:LYS:HE3  | 2.03                     | 0.59              |
| 1:A:418:VAL:CG1  | 1:A:421:MET:HE3  | 2.34                     | 0.58              |
| 1:A:418:VAL:HG11 | 1:A:421:MET:HE3  | 1.84                     | 0.57              |
| 1:C:531:LYS:HG3  | 1:C:532:ASN:H    | 1.68                     | 0.57              |
| 1:B:501:HIS:HD2  | 4:S:11:HOH:O     | 1.87                     | 0.56              |
| 1:B:338:SER:O    | 1:B:339:GLU:CG   | 2.53                     | 0.56              |
| 1:B:332:ASP:HB3  | 1:B:335:ARG:HG2  | 1.88                     | 0.55              |
| 1:D:535:PRO:HA   | 1:D:539:LEU:HD23 | 1.90                     | 0.54              |
| 1:D:348:ASN:ND2  | 1:D:352:ARG:HH21 | 2.05                     | 0.53              |
| 1:B:462:LEU:O    | 1:B:462:LEU:HD13 | 2.08                     | 0.53              |
| 1:C:418:VAL:HG22 | 1:C:421:MET:HB2  | 1.91                     | 0.53              |
| 1:B:338:SER:O    | 1:B:339:GLU:CB   | 2.57                     | 0.53              |
| 1:A:418:VAL:HG22 | 1:A:421:MET:HB2  | 1.92                     | 0.52              |
| 1:A:342:MET:CE   | 1:A:417:CYS:HB3  | 2.39                     | 0.52              |
| 1:B:535:PRO:HA   | 1:B:539:LEU:HD23 | 1.91                     | 0.52              |
| 1:C:513:HIS:CD2  | 1:D:459:TYR:CD2  | 2.96                     | 0.52              |
| 1:C:532:ASN:ND2  | 1:C:532:ASN:O    | 2.43                     | 0.52              |
| 1:D:492:LYS:C    | 1:D:492:LYS:HD2  | 2.30                     | 0.52              |
| 1:A:342:MET:HE2  | 1:A:417:CYS:HB3  | 1.91                     | 0.51              |
| 1:C:513:HIS:CE1  | 1:D:459:TYR:CE2  | 2.99                     | 0.51              |
| 1:B:417:CYS:O    | 1:B:418:VAL:CG1  | 2.58                     | 0.51              |
| 1:C:342:MET:CE   | 1:C:417:CYS:HB3  | 2.39                     | 0.51              |
| 1:C:531:LYS:HG3  | 1:C:532:ASN:N    | 2.25                     | 0.51              |
| 1:D:467:LYS:HB2  | 4:S:175:HOH:O    | 2.12                     | 0.50              |
| 1:D:418:VAL:HB   | 1:D:421:MET:SD   | 2.52                     | 0.50              |
| 1:D:423:GLU:HG3  | 1:D:424:ILE:N    | 2.25                     | 0.50              |
| 1:B:418:VAL:HG22 | 1:B:421:MET:HB2  | 1.94                     | 0.50              |
| 1:C:362:LYS:HD3  | 1:C:544:LEU:HD12 | 1.94                     | 0.50              |
| 1:D:373:HIS:CD2  | 1:D:537:TYR:OH   | 2.65                     | 0.50              |
| 1:B:373:HIS:CD2  | 1:B:537:TYR:OH   | 2.65                     | 0.49              |
| 1:D:424:ILE:HD13 | 1:D:427:MET:CE   | 2.43                     | 0.49              |
| 1:C:342:MET:HE3  | 1:C:418:VAL:HG13 | 1.95                     | 0.49              |
| 1:C:368:VAL:HG22 | 4:S:156:HOH:O    | 2.13                     | 0.49              |
| 1:C:339:GLU:HG3  | 1:C:418:VAL:HB   | 1.94                     | 0.48              |
| 1:B:424:ILE:HD13 | 1:B:427:MET:CE   | 2.43                     | 0.48              |
| 1:C:342:MET:HE3  | 1:C:418:VAL:CG1  | 2.44                     | 0.48              |
| 1:B:416:LYS:CG   | 1:B:422:VAL:HG11 | 2.43                     | 0.47              |

*Continued on next page...*

Continued from previous page...

| Atom-1           | Atom-2           | Interatomic distance (Å) | Clash overlap (Å) |
|------------------|------------------|--------------------------|-------------------|
| 1:C:513:HIS:CG   | 1:D:459:TYR:HD2  | 2.33                     | 0.47              |
| 1:C:513:HIS:CE1  | 1:D:459:TYR:CD2  | 3.02                     | 0.47              |
| 1:C:513:HIS:NE2  | 1:D:459:TYR:CD2  | 2.83                     | 0.47              |
| 1:A:339:GLU:HG3  | 1:A:418:VAL:HB   | 1.96                     | 0.47              |
| 1:B:462:LEU:HD22 | 1:B:462:LEU:C    | 2.36                     | 0.46              |
| 1:B:533:VAL:HG22 | 3:E:2:LIG:C22    | 2.46                     | 0.46              |
| 1:B:352:ARG:HD2  | 2:F:2:CL:CL      | 2.53                     | 0.46              |
| 1:D:498:GLN:HA   | 1:D:501:HIS:CE1  | 2.51                     | 0.46              |
| 1:C:358:ILE:HG23 | 1:C:544:LEU:HD13 | 1.99                     | 0.45              |
| 1:D:473:ASP:OD2  | 1:D:477:ARG:NH1  | 2.50                     | 0.45              |
| 1:A:312:ALA:O    | 1:A:316:VAL:HG23 | 2.16                     | 0.44              |
| 1:C:312:ALA:O    | 1:C:316:VAL:HG23 | 2.17                     | 0.44              |
| 1:D:492:LYS:HD2  | 1:D:493:ALA:N    | 2.32                     | 0.44              |
| 1:B:501:HIS:CD2  | 4:S:11:HOH:O     | 2.67                     | 0.44              |
| 1:B:416:LYS:HG3  | 1:B:422:VAL:HG11 | 2.00                     | 0.43              |
| 1:B:417:CYS:C    | 1:B:418:VAL:CG1  | 2.87                     | 0.43              |
| 1:C:463:SER:CB   | 1:C:468:SER:HB2  | 2.45                     | 0.43              |
| 1:A:529:LYS:HD3  | 1:A:529:LYS:N    | 2.35                     | 0.42              |
| 1:B:522:MET:HG3  | 1:B:526:TYR:CE1  | 2.53                     | 0.42              |
| 1:D:392:VAL:HG12 | 1:D:435:PHE:CD2  | 2.55                     | 0.42              |
| 1:B:312:ALA:O    | 1:B:316:VAL:HG23 | 2.19                     | 0.42              |
| 1:C:526:TYR:O    | 1:C:529:LYS:O    | 2.37                     | 0.42              |
| 1:B:351:ASP:HB2  | 1:B:533:VAL:HG11 | 2.00                     | 0.42              |
| 1:B:392:VAL:HG12 | 1:B:435:PHE:CD2  | 2.55                     | 0.41              |
| 1:A:342:MET:HE3  | 1:A:418:VAL:HG13 | 2.02                     | 0.41              |
| 1:D:489:LEU:O    | 1:D:492:LYS:HG3  | 2.20                     | 0.41              |
| 1:B:368:VAL:HG22 | 4:S:37:HOH:O     | 2.21                     | 0.41              |
| 1:D:316:VAL:HG21 | 1:D:489:LEU:HD21 | 2.01                     | 0.41              |
| 1:D:312:ALA:O    | 1:D:316:VAL:HG23 | 2.20                     | 0.41              |
| 1:D:331:TYR:OH   | 1:D:407:ASN:O    | 2.31                     | 0.41              |
| 1:C:392:VAL:HG12 | 1:C:435:PHE:CD2  | 2.55                     | 0.41              |
| 1:D:460:THR:HG23 | 4:S:181:HOH:O    | 2.22                     | 0.40              |
| 1:A:329:SER:O    | 1:A:330:GLU:C    | 2.60                     | 0.40              |
| 1:B:316:VAL:HG21 | 1:B:489:LEU:HD21 | 2.02                     | 0.40              |

All (2) symmetry-related close contacts are listed below. The label for Atom-2 includes the symmetry operator and encoded unit-cell translations to be applied.

| Atom-1         | Atom-2                 | Interatomic distance (Å) | Clash overlap (Å) |
|----------------|------------------------|--------------------------|-------------------|
| 1:A:328:TYR:OH | 1:B:359:ASN:ND2[1_645] | 2.05                     | 0.15              |
| 1:A:481:LYS:NZ | 1:B:538:ASP:OD2[1_655] | 2.19                     | 0.01              |

## 5.3 Torsion angles [i](#)

### 5.3.1 Protein backbone [i](#)

In the following table, the Percentiles column shows the percent Ramachandran outliers of the chain as a percentile score with respect to all X-ray entries followed by that with respect to entries of similar resolution.

The Analysed column shows the number of residues for which the backbone conformation was analysed, and the total number of residues.

| Mol | Chain | Analysed       | Favoured  | Allowed | Outliers | Percentiles |     |
|-----|-------|----------------|-----------|---------|----------|-------------|-----|
| 1   | A     | 240/257 (93%)  | 237 (99%) | 2 (1%)  | 1 (0%)   | 34          | 19  |
| 1   | B     | 243/257 (95%)  | 237 (98%) | 4 (2%)  | 2 (1%)   | 19          | 7   |
| 1   | C     | 241/257 (94%)  | 236 (98%) | 3 (1%)  | 2 (1%)   | 19          | 7   |
| 1   | D     | 236/257 (92%)  | 233 (99%) | 3 (1%)  | 0        | 100         | 100 |
| All | All   | 960/1028 (93%) | 943 (98%) | 12 (1%) | 5 (0%)   | 29          | 14  |

All (5) Ramachandran outliers are listed below:

| Mol | Chain | Res | Type |
|-----|-------|-----|------|
| 1   | B     | 339 | GLU  |
| 1   | C     | 531 | LYS  |
| 1   | A     | 330 | GLU  |
| 1   | B     | 418 | VAL  |
| 1   | C     | 330 | GLU  |

### 5.3.2 Protein sidechains [i](#)

In the following table, the Percentiles column shows the percent sidechain outliers of the chain as a percentile score with respect to all X-ray entries followed by that with respect to entries of similar resolution.

The Analysed column shows the number of residues for which the sidechain conformation was analysed, and the total number of residues.

| Mol | Chain | Analysed      | Rotameric | Outliers | Percentiles |    |
|-----|-------|---------------|-----------|----------|-------------|----|
| 1   | A     | 220/232 (95%) | 212 (96%) | 8 (4%)   | 35          | 18 |
| 1   | B     | 221/232 (95%) | 213 (96%) | 8 (4%)   | 35          | 18 |
| 1   | C     | 219/232 (94%) | 211 (96%) | 8 (4%)   | 34          | 17 |
| 1   | D     | 218/232 (94%) | 208 (95%) | 10 (5%)  | 27          | 11 |
| All | All   | 878/928 (95%) | 844 (96%) | 34 (4%)  | 32          | 15 |

All (34) residues with a non-rotameric sidechain are listed below:

| Mol | Chain | Res | Type |
|-----|-------|-----|------|
| 1   | A     | 300 | ARG  |
| 1   | A     | 301 | SER  |
| 1   | A     | 432 | SER  |
| 1   | A     | 463 | SER  |
| 1   | A     | 467 | LYS  |
| 1   | A     | 515 | ARG  |
| 1   | A     | 520 | LYS  |
| 1   | A     | 529 | LYS  |
| 1   | B     | 372 | SER  |
| 1   | B     | 412 | ARG  |
| 1   | B     | 418 | VAL  |
| 1   | B     | 432 | SER  |
| 1   | B     | 462 | LEU  |
| 1   | B     | 463 | SER  |
| 1   | B     | 470 | GLU  |
| 1   | B     | 544 | LEU  |
| 1   | C     | 306 | LEU  |
| 1   | C     | 432 | SER  |
| 1   | C     | 437 | MET  |
| 1   | C     | 462 | LEU  |
| 1   | C     | 463 | SER  |
| 1   | C     | 529 | LYS  |
| 1   | C     | 532 | ASN  |
| 1   | C     | 544 | LEU  |
| 1   | D     | 303 | LYS  |
| 1   | D     | 337 | PHE  |
| 1   | D     | 412 | ARG  |
| 1   | D     | 425 | PHE  |
| 1   | D     | 432 | SER  |
| 1   | D     | 437 | MET  |
| 1   | D     | 470 | GLU  |
| 1   | D     | 492 | LYS  |
| 1   | D     | 529 | LYS  |
| 1   | D     | 544 | LEU  |

Some sidechains can be flipped to improve hydrogen bonding and reduce clashes. All (15) such sidechains are listed below:

| Mol | Chain | Res | Type |
|-----|-------|-----|------|
| 1   | A     | 398 | HIS  |
| 1   | A     | 488 | HIS  |
| 1   | A     | 501 | HIS  |

*Continued on next page...*

*Continued from previous page...*

| Mol | Chain | Res | Type |
|-----|-------|-----|------|
| 1   | B     | 373 | HIS  |
| 1   | B     | 398 | HIS  |
| 1   | B     | 501 | HIS  |
| 1   | B     | 547 | HIS  |
| 1   | C     | 398 | HIS  |
| 1   | C     | 413 | ASN  |
| 1   | C     | 513 | HIS  |
| 1   | C     | 532 | ASN  |
| 1   | D     | 348 | ASN  |
| 1   | D     | 373 | HIS  |
| 1   | D     | 398 | HIS  |
| 1   | D     | 439 | ASN  |

### 5.3.3 RNA [i](#)

There are no RNA molecules in this entry.

### 5.4 Non-standard residues in protein, DNA, RNA chains [i](#)

There are no non-standard protein/DNA/RNA residues in this entry.

### 5.5 Carbohydrates [i](#)

There are no monosaccharides in this entry.

### 5.6 Ligand geometry [i](#)

Of 6 ligands modelled in this entry, 4 could not be matched to an existing wwPDB Chemical Component Dictionary definition at this stage and 2 are monoatomic - leaving 0 for Mogul analysis.

There are no bond length outliers.

There are no bond angle outliers.

There are no chirality outliers.

There are no torsion outliers.

There are no ring outliers.

No monomer is involved in short contacts.

The following is a two-dimensional graphical depiction of Mogul quality analysis of bond lengths, bond angles, torsion angles, and ring geometry for all instances of the Ligand of Interest. In addition, ligands with molecular weight > 250 and outliers as shown on the validation Tables will also be included. For torsion angles, if less than 5% of the Mogul distribution of torsion angles is within 10 degrees of the torsion angle in question, then that torsion angle is considered an outlier. Any bond that is central to one or more torsion angles identified as an outlier by Mogul will be highlighted in the graph. For rings, the root-mean-square deviation (RMSD) between the ring in question and similar rings identified by Mogul is calculated over all ring torsion angles. If the average RMSD is greater than 60 degrees and the minimal RMSD between the ring in question and any Mogul-identified rings is also greater than 60 degrees, then that ring is considered an outlier. The outliers are highlighted in purple. The color gray indicates Mogul did not find sufficient equivalents in the CSD to analyse the geometry.

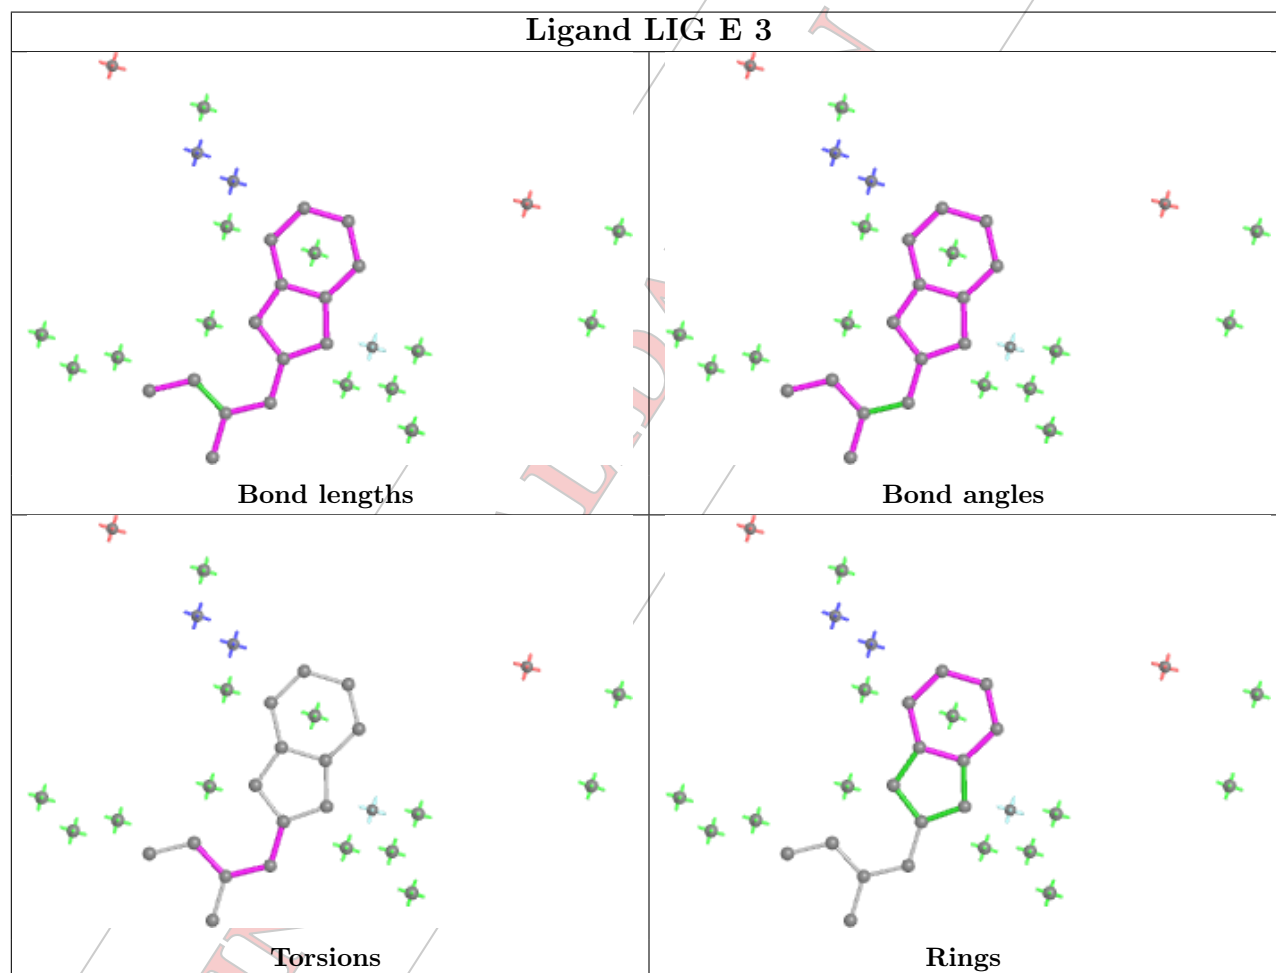

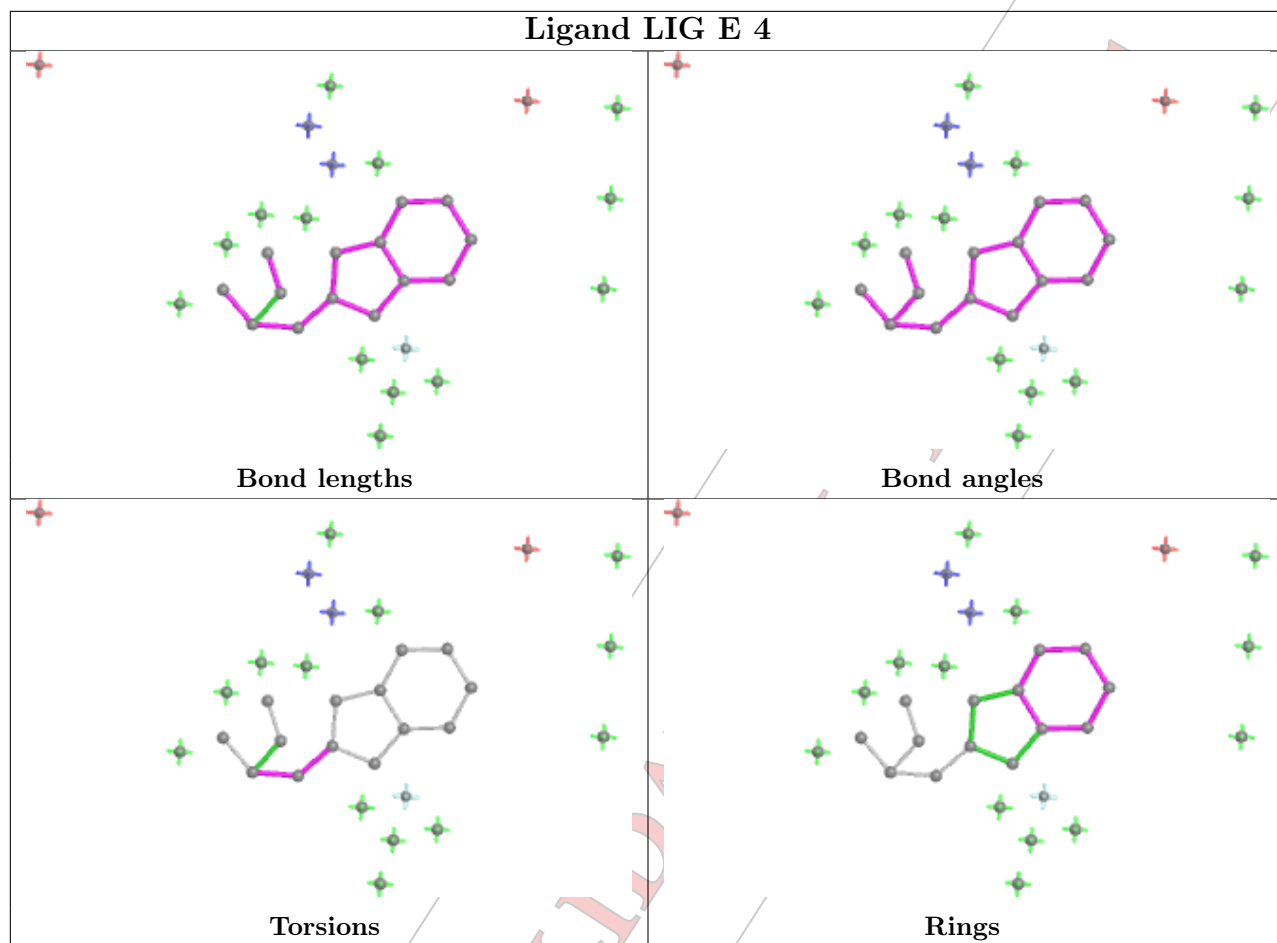

PRELIMINARY VALIDATION



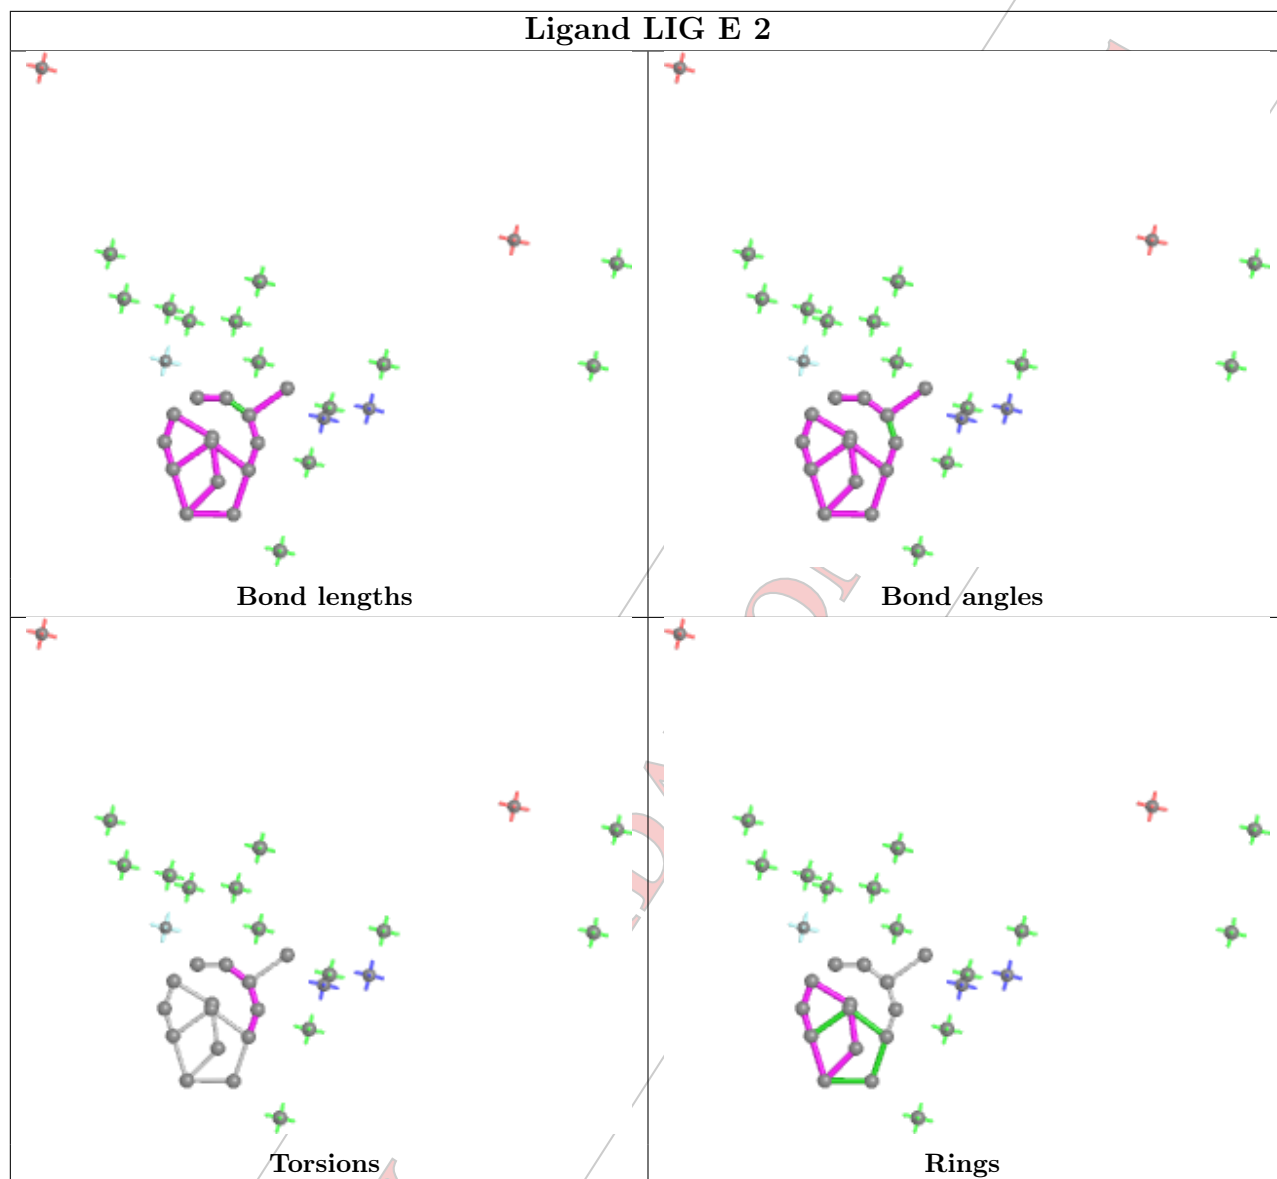

PRELIMINARY

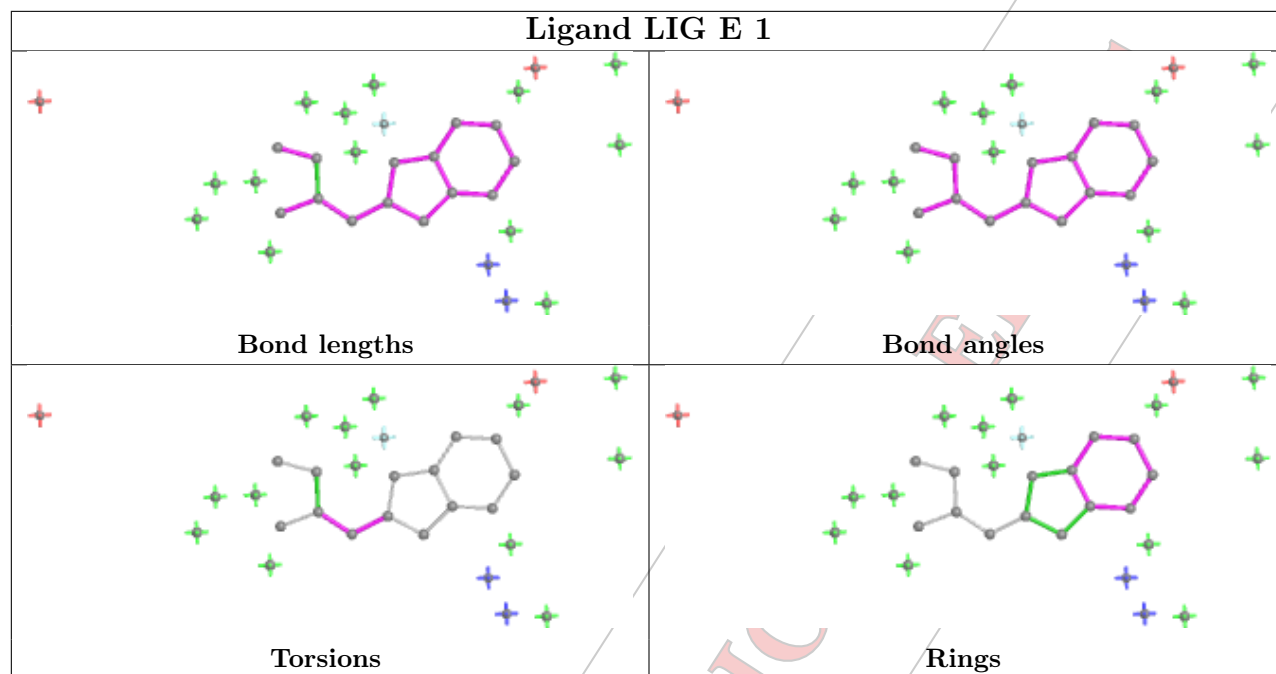

## 5.7 Other polymers [i](#)

There are no such residues in this entry.

## 5.8 Polymer linkage issues [i](#)

There are no chain breaks in this entry.

PRELIMINARY VALIDATION

## 6 Fit of model and data i

### 6.1 Protein, DNA and RNA chains i

In the following table, the column labelled '#RSRZ > 2' contains the number (and percentage) of RSRZ outliers, followed by percent RSRZ outliers for the chain as percentile scores relative to all X-ray entries and entries of similar resolution. The OWAB column contains the minimum, median, 95<sup>th</sup> percentile and maximum values of the occupancy-weighted average B-factor per residue. The column labelled 'Q < 0.9' lists the number of (and percentage) of residues with an average occupancy less than 0.9.

| Mol | Chain | Analysed       | <RSRZ> | #RSRZ>2       | OWAB(Å <sup>2</sup> ) | Q<0.9 |
|-----|-------|----------------|--------|---------------|-----------------------|-------|
| 1   | A     | 243/257 (94%)  | 0.23   | 11 (4%) 33 31 | 18, 31, 60, 96        | 0     |
| 1   | B     | 245/257 (95%)  | 0.40   | 18 (7%) 15 14 | 16, 31, 68, 108       | 0     |
| 1   | C     | 243/257 (94%)  | 0.17   | 10 (4%) 37 35 | 17, 30, 61, 108       | 0     |
| 1   | D     | 242/257 (94%)  | 0.46   | 17 (7%) 16 16 | 17, 32, 76, 123       | 0     |
| All | All   | 973/1028 (94%) | 0.31   | 56 (5%) 23 22 | 16, 31, 69, 123       | 0     |

All (56) RSRZ outliers are listed below:

| Mol | Chain | Res | Type | RSRZ |
|-----|-------|-----|------|------|
| 1   | D     | 468 | SER  | 9.2  |
| 1   | D     | 304 | ASN  | 8.1  |
| 1   | D     | 467 | LYS  | 8.1  |
| 1   | C     | 462 | LEU  | 7.5  |
| 1   | A     | 462 | LEU  | 7.5  |
| 1   | D     | 469 | LEU  | 7.3  |
| 1   | B     | 304 | ASN  | 7.1  |
| 1   | D     | 337 | PHE  | 7.0  |
| 1   | B     | 337 | PHE  | 5.8  |
| 1   | B     | 418 | VAL  | 5.8  |
| 1   | B     | 420 | GLY  | 5.7  |
| 1   | B     | 419 | GLU  | 5.6  |
| 1   | C     | 530 | CYS  | 5.4  |
| 1   | B     | 462 | LEU  | 5.3  |
| 1   | B     | 526 | TYR  | 4.3  |
| 1   | B     | 464 | SER  | 4.3  |
| 1   | C     | 532 | ASN  | 4.3  |
| 1   | D     | 340 | ALA  | 4.3  |
| 1   | A     | 300 | ARG  | 4.3  |
| 1   | C     | 526 | TYR  | 4.2  |
| 1   | B     | 463 | SER  | 4.1  |

*Continued on next page...*

Continued from previous page...

| Mol | Chain | Res | Type | RSRZ |
|-----|-------|-----|------|------|
| 1   | A     | 526 | TYR  | 4.0  |
| 1   | A     | 461 | PHE  | 4.0  |
| 1   | B     | 546 | ALA  | 3.9  |
| 1   | C     | 460 | THR  | 3.9  |
| 1   | B     | 417 | CYS  | 3.6  |
| 1   | D     | 306 | LEU  | 3.4  |
| 1   | A     | 331 | TYR  | 3.3  |
| 1   | B     | 338 | SER  | 3.3  |
| 1   | B     | 547 | HIS  | 3.3  |
| 1   | B     | 340 | ALA  | 3.2  |
| 1   | A     | 332 | ASP  | 3.1  |
| 1   | B     | 303 | LYS  | 3.1  |
| 1   | D     | 459 | TYR  | 3.1  |
| 1   | D     | 305 | SER  | 3.0  |
| 1   | D     | 530 | CYS  | 3.0  |
| 1   | A     | 469 | LEU  | 3.0  |
| 1   | D     | 552 | PRO  | 2.9  |
| 1   | A     | 305 | SER  | 2.9  |
| 1   | A     | 301 | SER  | 2.9  |
| 1   | D     | 461 | PHE  | 2.8  |
| 1   | D     | 334 | THR  | 2.8  |
| 1   | C     | 331 | TYR  | 2.8  |
| 1   | D     | 331 | TYR  | 2.5  |
| 1   | B     | 306 | LEU  | 2.5  |
| 1   | B     | 548 | ARG  | 2.4  |
| 1   | D     | 529 | LYS  | 2.3  |
| 1   | D     | 549 | LEU  | 2.3  |
| 1   | C     | 464 | SER  | 2.2  |
| 1   | A     | 459 | TYR  | 2.1  |
| 1   | C     | 461 | PHE  | 2.1  |
| 1   | A     | 466 | LEU  | 2.1  |
| 1   | D     | 528 | MET  | 2.1  |
| 1   | C     | 469 | LEU  | 2.1  |
| 1   | C     | 459 | TYR  | 2.1  |
| 1   | B     | 411 | ASP  | 2.0  |

## 6.2 Non-standard residues in protein, DNA, RNA chains [i](#)

There are no non-standard protein/DNA/RNA residues in this entry.

### 6.3 Carbohydrates [i](#)

There are no monosaccharides in this entry.

### 6.4 Ligands [i](#)

In the following table, the Atoms column lists the number of modelled atoms in the group and the number defined in the chemical component dictionary. The B-factors column lists the minimum, median, 95<sup>th</sup> percentile and maximum values of B factors of atoms in the group. The column labelled 'Q< 0.9' lists the number of atoms with occupancy less than 0.9.

| Mol | Type | Chain | Res | Atoms | RSCC | RSR  | B-factors(Å <sup>2</sup> ) | Q<0.9 |
|-----|------|-------|-----|-------|------|------|----------------------------|-------|
| 3   | LIG  | E     | 4   | 32/?  | 0.95 | 0.09 | 18,26,36,40                | 0     |
| 3   | LIG  | E     | 3   | 32/?  | 0.96 | 0.09 | 16,20,26,30                | 0     |
| 3   | LIG  | E     | 2   | 32/?  | 0.96 | 0.09 | 16,25,33,35                | 0     |
| 3   | LIG  | E     | 1   | 32/?  | 0.96 | 0.07 | 16,19,27,29                | 0     |
| 2   | CL   | F     | 1   | 1/?   | 0.99 | 0.09 | 34,34,34,34                | 0     |
| 2   | CL   | F     | 2   | 1/?   | 0.99 | 0.06 | 36,36,36,36                | 0     |

The following is a graphical depiction of the model fit to experimental electron density of all instances of the Ligand of Interest. In addition, ligands with molecular weight > 250 and outliers as shown on the geometry validation Tables will also be included. Each fit is shown from different orientation to approximate a three-dimensional view.

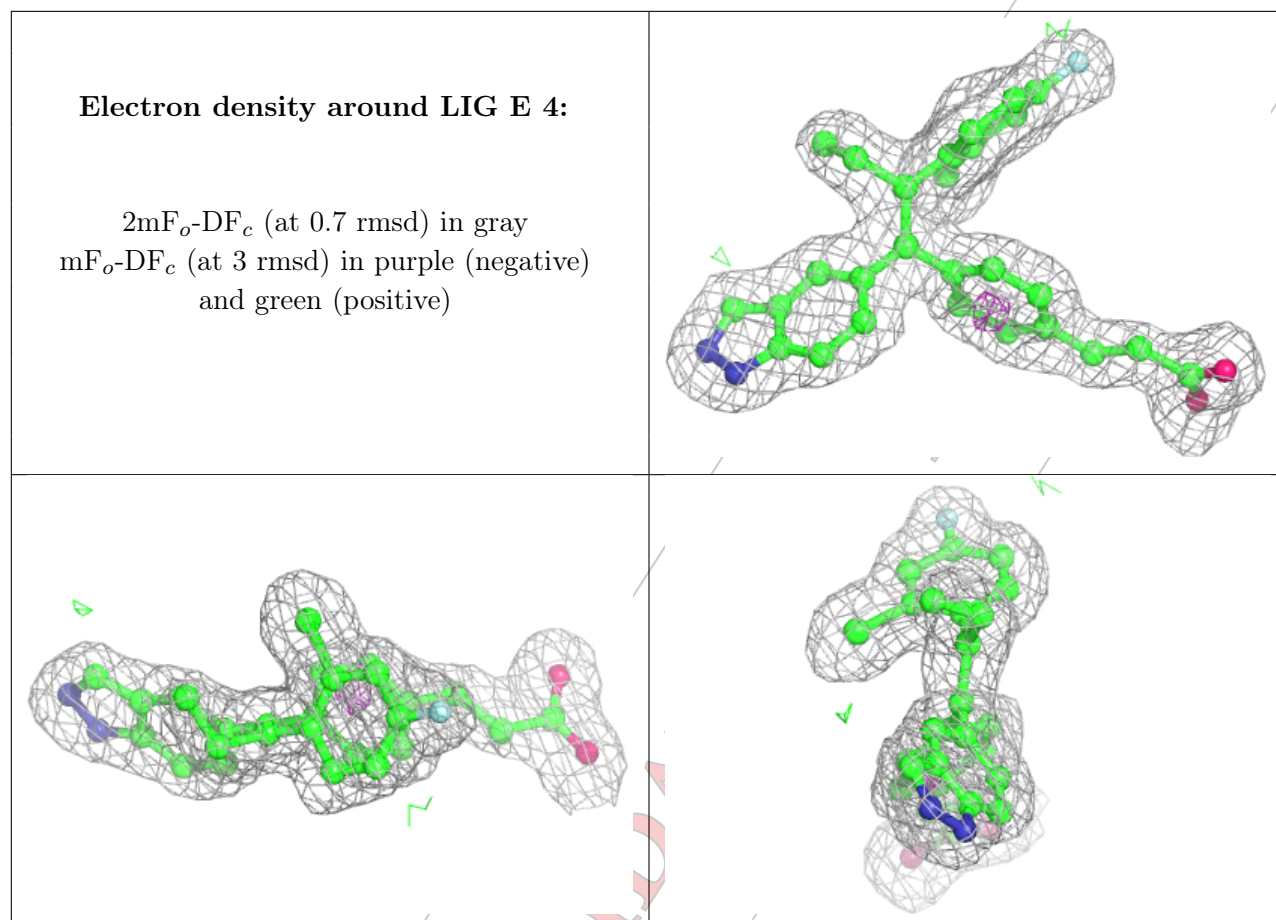

PRELIMINARY VALIDATION

**Electron density around LIG E 3:**

$2mF_o-DF_c$  (at 0.7 rmsd) in gray  
 $mF_o-DF_c$  (at 3 rmsd) in purple (negative)  
and green (positive)

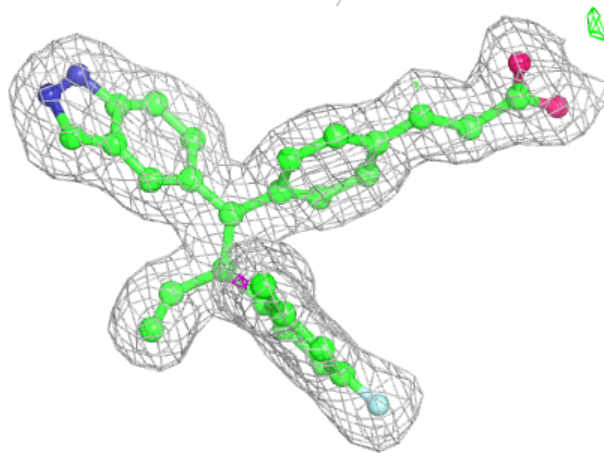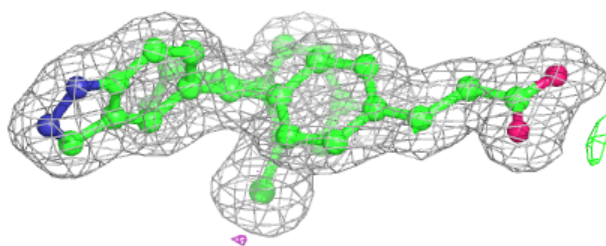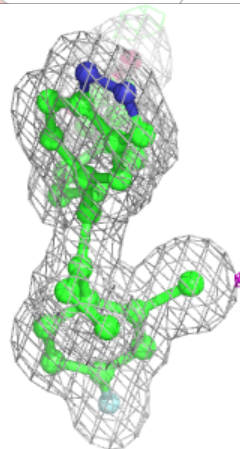

PRELIMINARY VALIDATION

**Electron density around LIG E 2:**

$2mF_o-DF_c$  (at 0.7 rmsd) in gray  
 $mF_o-DF_c$  (at 3 rmsd) in purple (negative)  
and green (positive)

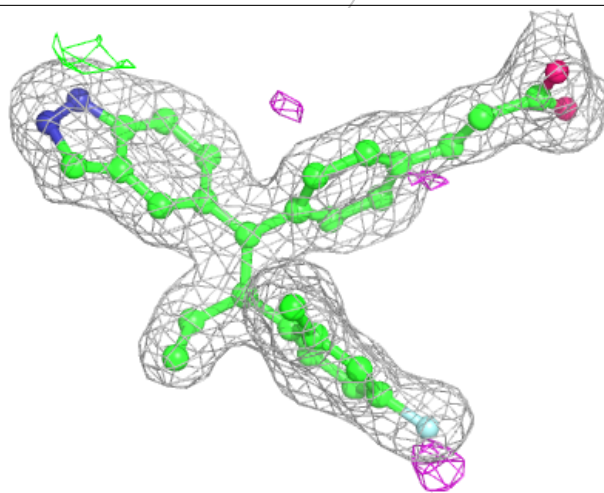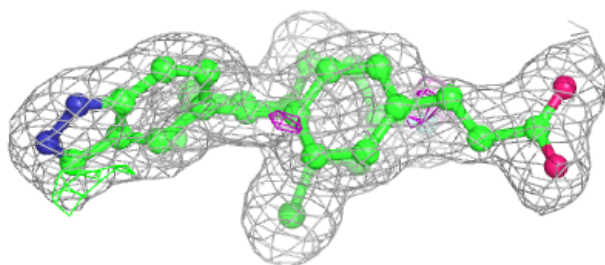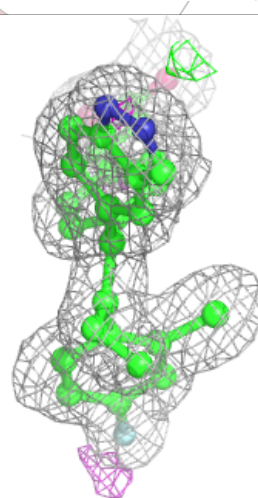

PRELIMINARY VA



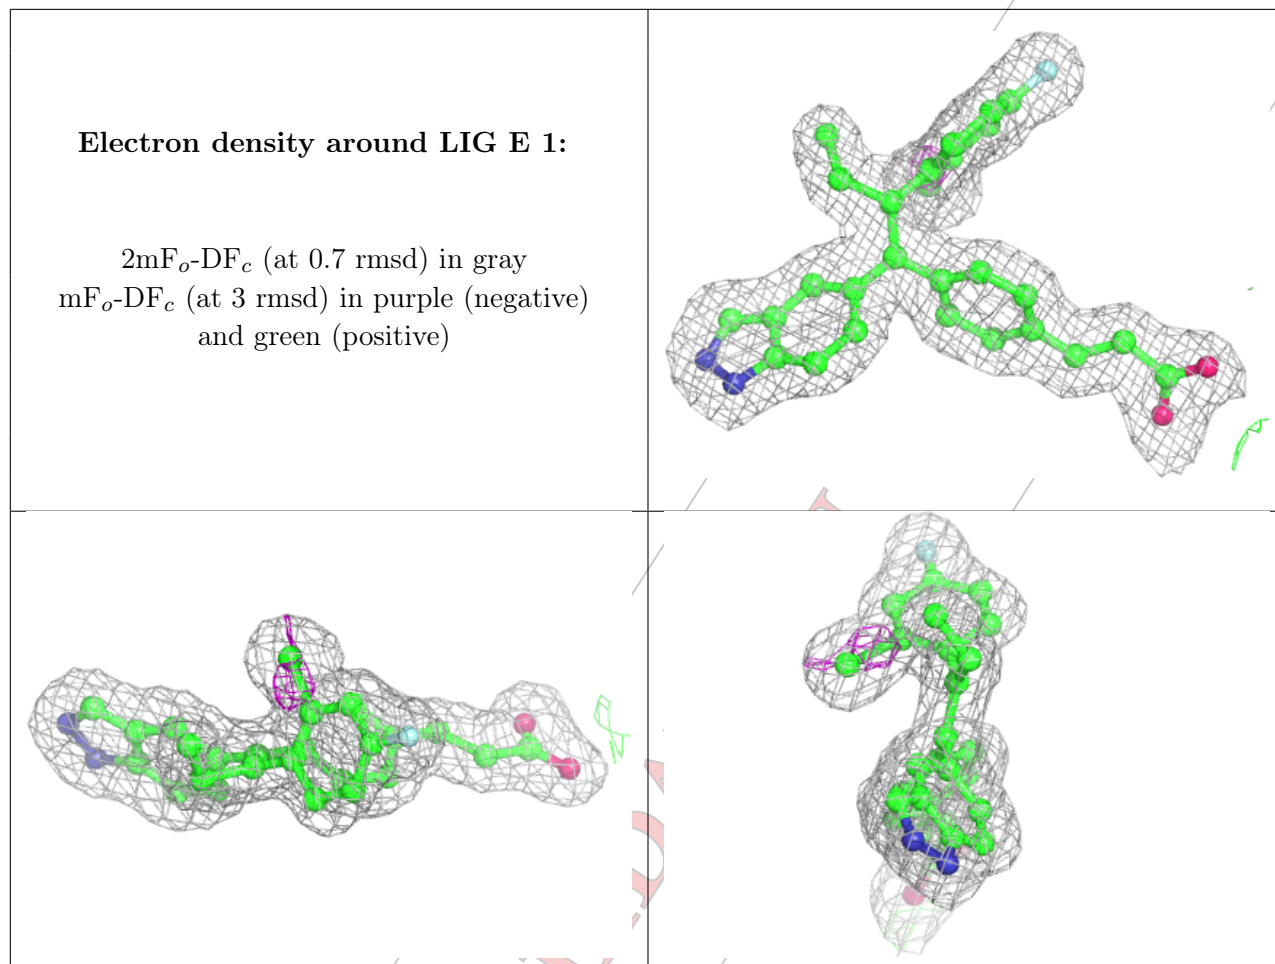

## 6.5 Other polymers [\(i\)](#)

There are no such residues in this entry.

PRELIMINARY VALIDATION
